# Supplementary material
Source: publisher figshare collection journal article supplement (https://acs.figshare.com/ndownloader/files/4202839)
Supplement: Supplementary file 1 [file 4202839]

data_xzrvi-199b 

_audit_update_record
;
2014-05-09 # Formatted by publCIF

;

# publcif _publ_body_element loop start
loop_
_publ_body_element
_publ_body_title
_publ_body_contents

 section 
;
Introduction
; 
;

;
 section 
;
Experimental
; 
;

;
 subsection 
;
Synthesis and crystallization
; 
;

;
 subsection 
;
Refinement
;
;
Crystal data, data collection and structure refinement details are summarized
in Table 1.
;

 section 
;
Results and discussion
; 
;

;
# publcif _publ_body_element loop end
  
_audit_creation_method            SHELXL-97 
_chemical_name_systematic 
? 
_chemical_name_common             ? 
_chemical_melting_point           ? 
_chemical_formula_moiety 
 'C19 H22 N2 O3, 2(C H Cl3)' 
_chemical_formula_sum 
 'C21 H24 Cl6 N2 O3' 
_chemical_formula_weight          565.12 
  
loop_ 
 _atom_type_symbol 
 _atom_type_description 
 _atom_type_scat_dispersion_real 
 _atom_type_scat_dispersion_imag 
 _atom_type_scat_source 
 'C'  'C'   0.0033   0.0016 
 'International Tables Vol C Tables 4.2.6.8 and 6.1.1.4' 
 'H'  'H'   0.0000   0.0000 
 'International Tables Vol C Tables 4.2.6.8 and 6.1.1.4' 
 'N'  'N'   0.0061   0.0033 
 'International Tables Vol C Tables 4.2.6.8 and 6.1.1.4' 
 'O'  'O'   0.0106   0.0060 
 'International Tables Vol C Tables 4.2.6.8 and 6.1.1.4' 
 'Cl'  'Cl'   0.1484   0.1585 
 'International Tables Vol C Tables 4.2.6.8 and 6.1.1.4' 
  
_symmetry_cell_setting            triclinic 
_symmetry_space_group_name_H-M    'P -1'
_symmetry_space_group_name_Hall   '-P 1'  
  
loop_ 
 _symmetry_equiv_pos_as_xyz 
 'x, y, z' 
 '-x, -y, -z' 
  
_cell_length_a                    16.5205(19) 
_cell_length_b                    16.738(3) 
_cell_length_c                    18.753(3) 
_cell_angle_alpha                 95.956(12) 
_cell_angle_beta                  91.273(10) 
_cell_angle_gamma                 103.102(11) 
_cell_volume                      5017.7(13) 
_cell_formula_units_Z             8 
_cell_measurement_temperature     100(2) 
_cell_measurement_reflns_used     137 
_cell_measurement_theta_min       3 
_cell_measurement_theta_max       22 
  
_exptl_crystal_description        prism 
_exptl_crystal_colour             colourless 
_exptl_crystal_size_max           0.45 
_exptl_crystal_size_mid           0.36 
_exptl_crystal_size_min           0.19 
_exptl_crystal_density_meas       ? 
_exptl_crystal_density_diffrn     1.496 
_exptl_crystal_density_method     'not measured' 
_exptl_crystal_F_000              2320 
_exptl_absorpt_coefficient_mu     0.711 
_exptl_absorpt_correction_type    multi-scan 
_exptl_absorpt_correction_T_min   0.3791 
_exptl_absorpt_correction_T_max   0.7460 
_exptl_absorpt_process_details    'SADABS 2008, Bruker, 2008' 
  
_exptl_special_details 
? 
  
_diffrn_ambient_temperature       100(2) 
_diffrn_radiation_wavelength      0.71073 
_diffrn_radiation_type            MoK\a 
_diffrn_radiation_source          'fine-focus sealed tube' 
_diffrn_radiation_monochromator   graphite 
_diffrn_measurement_device_type   'Bruker APEX II CCD' 
_diffrn_measurement_method        'phi and omega scans' 
_diffrn_detector_area_resol_mean  ? 
_diffrn_standards_number          ? 
_diffrn_standards_interval_count  ? 
_diffrn_standards_interval_time   ? 
_diffrn_standards_decay_%         ? 
_diffrn_reflns_number             69487 
_diffrn_reflns_av_R_equivalents   0.0655 
_diffrn_reflns_av_sigmaI/netI     0.0773 
_diffrn_reflns_limit_h_min        -23 
_diffrn_reflns_limit_h_max        22 
_diffrn_reflns_limit_k_min        -23 
_diffrn_reflns_limit_k_max        23 
_diffrn_reflns_limit_l_min        -26 
_diffrn_reflns_limit_l_max        26 
_diffrn_reflns_theta_min          3.07 
_diffrn_reflns_theta_max          30.00 
_reflns_number_total              27892 
_reflns_number_gt                 18747 
_reflns_threshold_expression      >2sigma(I) 
  
_computing_data_collection        'Collect (Bruker AXS BV, 1997-2004)' 
_computing_cell_refinement        'Dirax/lsq (Duisenberg & Schreurs, 1989-2000)' 
_computing_data_reduction         'EvalCCD (Duisenberg & Schreurs, 1990-2000)' 
_computing_structure_solution     'SHELXS-97 (Sheldrick, 1990)' 
_computing_structure_refinement   'SHELXL-97 (Sheldrick, 1997)' 
_computing_molecular_graphics     'Bruker SHELXTL' 
_computing_publication_material   'Bruker SHELXTL' 
  
_refine_special_details 
; 
 Refinement of F^2^ against ALL reflections.  The weighted R-factor wR and 
 goodness of fit S are based on F^2^, conventional R-factors R are based 
 on F, with F set to zero for negative F^2^. The threshold expression of 
 F^2^ > 2sigma(F^2^) is used only for calculating R-factors(gt) etc. and is 
 not relevant to the choice of reflections for refinement.  R-factors based 
 on F^2^ are statistically about twice as large as those based on F, and R- 
 factors based on ALL data will be even larger. 
; 
  
_refine_ls_structure_factor_coef  Fsqd 
_refine_ls_matrix_type            full 
_refine_ls_weighting_scheme       calc 
_refine_ls_weighting_details 
 'calc w=1/[\s^2^(Fo^2^)+(0.1020P)^2^+19.1513P] where P=(Fo^2^+2Fc^2^)/3' 
_atom_sites_solution_primary      direct 
_atom_sites_solution_secondary    difmap 
_atom_sites_solution_hydrogens    geom 
_refine_ls_hydrogen_treatment     constr 
_refine_ls_extinction_method      none 
_refine_ls_extinction_coef        ? 
_refine_ls_number_reflns          27892 
_refine_ls_number_parameters      1153 
_refine_ls_number_restraints      0 
_refine_ls_R_factor_all           0.1309 
_refine_ls_R_factor_gt            0.0872 
_refine_ls_wR_factor_ref          0.2560 
_refine_ls_wR_factor_gt           0.2172 
_refine_ls_goodness_of_fit_ref    1.040 
_refine_ls_restrained_S_all       1.040 
_refine_ls_shift/su_max           0.000 
_refine_ls_shift/su_mean          0.000 
  
loop_ 
 _atom_site_label 
 _atom_site_type_symbol 
 _atom_site_fract_x 
 _atom_site_fract_y 
 _atom_site_fract_z 
 _atom_site_U_iso_or_equiv 
 _atom_site_adp_type 
 _atom_site_occupancy 
 _atom_site_symmetry_multiplicity 
 _atom_site_calc_flag 
 _atom_site_refinement_flags 
 _atom_site_disorder_assembly 
 _atom_site_disorder_group 
O1 O 0.13934(14) -0.05822(16) 0.08866(13) 0.0174(5) Uani 1 1 d . . . 
H1 H 0.1624 -0.0192 0.1195 0.026 Uiso 1 1 calc R . . 
O2 O 0.29642(16) -0.07151(17) 0.29328(14) 0.0237(5) Uani 1 1 d . . . 
O3 O 0.20613(17) -0.29463(18) -0.03677(15) 0.0278(6) Uani 1 1 d . . . 
O4 O -0.82788(15) -0.06752(16) -0.40992(13) 0.0198(5) Uani 1 1 d . . . 
H4A H -0.8109 -0.0288 -0.3771 0.030 Uiso 1 1 calc R . . 
O5 O -0.67920(17) -0.05439(18) -0.19163(14) 0.0247(5) Uani 1 1 d . . . 
O6 O -0.74212(18) -0.30868(17) -0.50565(15) 0.0283(6) Uani 1 1 d . . . 
O7 O -0.32866(16) -0.04418(16) -0.40720(13) 0.0194(5) Uani 1 1 d . . . 
H7A H -0.3061 -0.0060 -0.3754 0.029 Uiso 1 1 calc R . . 
O8 O -0.17824(16) -0.06321(17) -0.19898(14) 0.0237(5) Uani 1 1 d . . . 
O9 O -0.27594(18) -0.28723(18) -0.53050(16) 0.0298(6) Uani 1 1 d . . . 
O10 O 0.63784(15) -0.07867(16) 0.09035(13) 0.0180(5) Uani 1 1 d . . . 
H10 H 0.6598 -0.0359 0.1177 0.027 Uiso 1 1 calc R . . 
O11 O 0.79660(16) -0.05523(17) 0.30068(13) 0.0212(5) Uani 1 1 d . . . 
O12 O 0.72426(18) -0.31878(18) -0.00783(16) 0.0292(6) Uani 1 1 d . . . 
N1 N 0.24997(17) -0.14681(18) 0.18689(15) 0.0150(5) Uani 1 1 d . . . 
N2 N 0.20764(18) -0.24836(18) 0.08350(16) 0.0183(6) Uani 1 1 d . . . 
N3 N -0.71934(18) -0.13908(18) -0.29486(15) 0.0164(5) Uani 1 1 d . . . 
N4 N -0.75471(18) -0.25195(18) -0.39084(16) 0.0181(5) Uani 1 1 d . . . 
N5 N -0.22334(17) -0.13641(18) -0.30656(15) 0.0158(5) Uani 1 1 d . . . 
N6 N -0.26567(18) -0.23744(19) -0.41068(16) 0.0193(6) Uani 1 1 d . . . 
N7 N 0.75368(17) -0.14525(17) 0.20112(14) 0.0149(5) Uani 1 1 d . . . 
N8 N 0.71668(18) -0.26038(18) 0.10750(16) 0.0181(5) Uani 1 1 d . . . 
C1 C 0.1820(2) -0.1832(2) 0.13050(17) 0.0150(6) Uani 1 1 d . . . 
C2 C 0.1912(2) -0.1139(2) 0.07700(17) 0.0171(6) Uani 1 1 d . . . 
C3 C 0.2839(2) -0.0747(2) 0.08901(18) 0.0168(6) Uani 1 1 d . . . 
C4 C 0.3360(2) -0.0241(2) 0.04652(19) 0.0196(6) Uani 1 1 d . . . 
H4 H 0.3145 -0.0086 0.0040 0.024 Uiso 1 1 calc R . . 
C5 C 0.4200(2) 0.0036(2) 0.0669(2) 0.0217(7) Uani 1 1 d . . . 
H5 H 0.4556 0.0393 0.0388 0.026 Uiso 1 1 calc R . . 
C6 C 0.4525(2) -0.0208(2) 0.1288(2) 0.0219(7) Uani 1 1 d . . . 
H6 H 0.5101 -0.0022 0.1417 0.026 Uiso 1 1 calc R . . 
C7 C 0.4005(2) -0.0725(2) 0.17177(19) 0.0195(6) Uani 1 1 d . . . 
H7 H 0.4221 -0.0899 0.2134 0.023 Uiso 1 1 calc R . . 
C8 C 0.3166(2) -0.0970(2) 0.15119(18) 0.0168(6) Uani 1 1 d . . . 
C9 C 0.2376(2) -0.1173(2) 0.25648(18) 0.0170(6) Uani 1 1 d . . . 
C10 C 0.1523(2) -0.1415(2) 0.28537(19) 0.0212(7) Uani 1 1 d . . . 
H10A H 0.1441 -0.0964 0.3210 0.025 Uiso 1 1 calc R . . 
H10B H 0.1489 -0.1912 0.3105 0.025 Uiso 1 1 calc R . . 
C11 C 0.0823(2) -0.1595(2) 0.22716(18) 0.0192(6) Uani 1 1 d . . . 
H11A H 0.0779 -0.1072 0.2088 0.023 Uiso 1 1 calc R . . 
H11B H 0.0289 -0.1828 0.2484 0.023 Uiso 1 1 calc R . . 
C12 C 0.0973(2) -0.2208(2) 0.16401(18) 0.0182(6) Uani 1 1 d . . . 
C13 C 0.1036(2) -0.3030(2) 0.1928(2) 0.0216(7) Uani 1 1 d . . . 
H13A H 0.1444 -0.2902 0.2342 0.026 Uiso 1 1 calc R . . 
H13B H 0.0489 -0.3287 0.2105 0.026 Uiso 1 1 calc R . . 
C14 C 0.1293(2) -0.3657(2) 0.1380(2) 0.0254(8) Uani 1 1 d . . . 
H14A H 0.0872 -0.3824 0.0976 0.031 Uiso 1 1 calc R . . 
H14B H 0.1334 -0.4155 0.1607 0.031 Uiso 1 1 calc R . . 
C15 C 0.2139(2) -0.3256(2) 0.1102(2) 0.0237(7) Uani 1 1 d . . . 
H15A H 0.2574 -0.3147 0.1495 0.028 Uiso 1 1 calc R . . 
H15B H 0.2294 -0.3631 0.0712 0.028 Uiso 1 1 calc R . . 
C16 C 0.1976(2) -0.2421(2) 0.0123(2) 0.0210(7) Uani 1 1 d . . . 
C17 C 0.1740(2) -0.1623(2) 0.00233(18) 0.0206(7) Uani 1 1 d . . . 
H17A H 0.1145 -0.1719 -0.0131 0.025 Uiso 1 1 calc R . . 
H17B H 0.2084 -0.1328 -0.0336 0.025 Uiso 1 1 calc R . . 
C18 C 0.0261(2) -0.2343(2) 0.1051(2) 0.0221(7) Uani 1 1 d . . . 
H18A H 0.0246 -0.1802 0.0888 0.027 Uiso 1 1 calc R . . 
H18B H 0.0395 -0.2696 0.0634 0.027 Uiso 1 1 calc R . . 
C19 C -0.0606(2) -0.2741(2) 0.1288(2) 0.0259(8) Uani 1 1 d . . . 
H19A H -0.0614 -0.3298 0.1409 0.039 Uiso 1 1 calc R . . 
H19B H -0.1019 -0.2772 0.0897 0.039 Uiso 1 1 calc R . . 
H19C H -0.0740 -0.2406 0.1710 0.039 Uiso 1 1 calc R . . 
C21 C -0.7842(2) -0.1838(2) -0.35131(17) 0.0155(6) Uani 1 1 d . . . 
C22 C -0.7741(2) -0.1223(2) -0.41229(17) 0.0168(6) Uani 1 1 d . . . 
C23 C -0.6826(2) -0.0784(2) -0.39812(18) 0.0181(6) Uani 1 1 d . . . 
C24 C -0.6305(2) -0.0295(2) -0.44217(18) 0.0203(7) Uani 1 1 d . . . 
H24 H -0.6502 -0.0207 -0.4880 0.024 Uiso 1 1 calc R . . 
C25 C -0.5480(2) 0.0065(2) -0.4170(2) 0.0222(7) Uani 1 1 d . . . 
H25 H -0.5122 0.0419 -0.4452 0.027 Uiso 1 1 calc R . . 
C26 C -0.5186(2) -0.0095(2) -0.3511(2) 0.0214(7) Uani 1 1 d . . . 
H26 H -0.4621 0.0133 -0.3359 0.026 Uiso 1 1 calc R . . 
C27 C -0.5709(2) -0.0587(2) -0.30682(19) 0.0185(6) Uani 1 1 d . . . 
H27 H -0.5512 -0.0693 -0.2616 0.022 Uiso 1 1 calc R . . 
C28 C -0.6528(2) -0.0911(2) -0.33173(18) 0.0164(6) Uani 1 1 d . . . 
C29 C -0.7349(2) -0.1044(2) -0.22782(18) 0.0186(6) Uani 1 1 d . . . 
C30 C -0.8215(2) -0.1296(2) -0.20092(19) 0.0213(7) Uani 1 1 d . . . 
H30A H -0.8327 -0.0833 -0.1683 0.026 Uiso 1 1 calc R . . 
H30B H -0.8245 -0.1771 -0.1729 0.026 Uiso 1 1 calc R . . 
C31 C -0.8890(2) -0.1533(2) -0.26179(19) 0.0205(7) Uani 1 1 d . . . 
H31A H -0.8930 -0.1034 -0.2844 0.025 Uiso 1 1 calc R . . 
H31B H -0.9434 -0.1754 -0.2416 0.025 Uiso 1 1 calc R . . 
C32 C -0.8703(2) -0.2187(2) -0.31948(18) 0.0184(6) Uani 1 1 d . . . 
C33 C -0.8645(2) -0.2969(2) -0.2831(2) 0.0241(7) Uani 1 1 d . . . 
H33A H -0.8252 -0.2798 -0.2408 0.029 Uiso 1 1 calc R . . 
H33B H -0.9199 -0.3211 -0.2657 0.029 Uiso 1 1 calc R . . 
C34 C -0.8362(2) -0.3639(2) -0.3320(2) 0.0263(8) Uani 1 1 d . . . 
H34A H -0.8339 -0.4114 -0.3053 0.032 Uiso 1 1 calc R . . 
H34B H -0.8758 -0.3836 -0.3739 0.032 Uiso 1 1 calc R . . 
C35 C -0.7500(2) -0.3258(2) -0.3567(2) 0.0237(7) Uani 1 1 d . . . 
H35A H -0.7094 -0.3108 -0.3151 0.028 Uiso 1 1 calc R . . 
H35B H -0.7314 -0.3660 -0.3913 0.028 Uiso 1 1 calc R . . 
C36 C -0.7581(2) -0.2532(2) -0.46325(19) 0.0220(7) Uani 1 1 d . . . 
C37 C -0.7854(2) -0.1777(2) -0.48327(18) 0.0215(7) Uani 1 1 d . . . 
H37A H -0.8442 -0.1919 -0.5015 0.026 Uiso 1 1 calc R . . 
H37B H -0.7500 -0.1510 -0.5200 0.026 Uiso 1 1 calc R . . 
C38 C -0.9396(2) -0.2389(3) -0.3804(2) 0.0256(8) Uani 1 1 d . . . 
H38A H -0.9417 -0.1874 -0.4011 0.031 Uiso 1 1 calc R . . 
H38B H -0.9242 -0.2771 -0.4189 0.031 Uiso 1 1 calc R . . 
C39 C -1.0269(2) -0.2779(3) -0.3570(2) 0.0340(10) Uani 1 1 d . . . 
H39A H -1.0271 -0.3318 -0.3410 0.051 Uiso 1 1 calc R . . 
H39B H -1.0672 -0.2849 -0.3976 0.051 Uiso 1 1 calc R . . 
H39C H -1.0420 -0.2418 -0.3175 0.051 Uiso 1 1 calc R . . 
C41 C -0.2904(2) -0.1713(2) -0.36369(17) 0.0163(6) Uani 1 1 d . . . 
C42 C -0.2781(2) -0.1018(2) -0.41732(17) 0.0171(6) Uani 1 1 d . . . 
C43 C -0.1852(2) -0.0636(2) -0.40307(17) 0.0173(6) Uani 1 1 d . . . 
C44 C -0.1319(2) -0.0114(2) -0.44402(18) 0.0214(7) Uani 1 1 d . . . 
H44 H -0.1517 0.0053 -0.4867 0.026 Uiso 1 1 calc R . . 
C45 C -0.0482(2) 0.0154(2) -0.42017(19) 0.0217(7) Uani 1 1 d . . . 
H45 H -0.0112 0.0526 -0.4462 0.026 Uiso 1 1 calc R . . 
C46 C -0.0180(2) -0.0114(2) -0.3587(2) 0.0230(7) Uani 1 1 d . . . 
H46 H 0.0395 0.0057 -0.3447 0.028 Uiso 1 1 calc R . . 
C47 C -0.0721(2) -0.0634(2) -0.31767(19) 0.0196(6) Uani 1 1 d . . . 
H47 H -0.0526 -0.0816 -0.2756 0.024 Uiso 1 1 calc R . . 
C48 C -0.1551(2) -0.0873(2) -0.34085(17) 0.0163(6) Uani 1 1 d . . . 
C49 C -0.2365(2) -0.1079(2) -0.23641(17) 0.0177(6) Uani 1 1 d . . . 
C50 C -0.3230(2) -0.1307(2) -0.20908(19) 0.0213(7) Uani 1 1 d . . . 
H50A H -0.3311 -0.0854 -0.1736 0.026 Uiso 1 1 calc R . . 
H50B H -0.3283 -0.1808 -0.1841 0.026 Uiso 1 1 calc R . . 
C51 C -0.3915(2) -0.1469(2) -0.26908(19) 0.0199(7) Uani 1 1 d . . . 
H51A H -0.3943 -0.0939 -0.2870 0.024 Uiso 1 1 calc R . . 
H51B H -0.4459 -0.1697 -0.2492 0.024 Uiso 1 1 calc R . . 
C52 C -0.3761(2) -0.2073(2) -0.33203(18) 0.0179(6) Uani 1 1 d . . . 
C53 C -0.3727(2) -0.2908(2) -0.30314(19) 0.0213(7) Uani 1 1 d . . . 
H53A H -0.3329 -0.2792 -0.2611 0.026 Uiso 1 1 calc R . . 
H53B H -0.4283 -0.3156 -0.2864 0.026 Uiso 1 1 calc R . . 
C54 C -0.3472(2) -0.3542(2) -0.3579(2) 0.0268(8) Uani 1 1 d . . . 
H54A H -0.3447 -0.4045 -0.3353 0.032 Uiso 1 1 calc R . . 
H54B H -0.3887 -0.3700 -0.3989 0.032 Uiso 1 1 calc R . . 
C55 C -0.2619(2) -0.3157(2) -0.3844(2) 0.0237(7) Uani 1 1 d . . . 
H55A H -0.2192 -0.3061 -0.3446 0.028 Uiso 1 1 calc R . . 
H55B H -0.2467 -0.3533 -0.4234 0.028 Uiso 1 1 calc R . . 
C56 C -0.2777(2) -0.2320(2) -0.48185(19) 0.0212(7) Uani 1 1 d . . . 
C57 C -0.2952(2) -0.1489(2) -0.49208(18) 0.0211(7) Uani 1 1 d . . . 
H57A H -0.3537 -0.1548 -0.5089 0.025 Uiso 1 1 calc R . . 
H57B H -0.2578 -0.1208 -0.5270 0.025 Uiso 1 1 calc R . . 
C58 C -0.4460(2) -0.2200(2) -0.39181(19) 0.0221(7) Uani 1 1 d . . . 
H58A H -0.4481 -0.1654 -0.4066 0.027 Uiso 1 1 calc R . . 
H58B H -0.4309 -0.2533 -0.4340 0.027 Uiso 1 1 calc R . . 
C59 C -0.5331(2) -0.2623(3) -0.3711(2) 0.0282(8) Uani 1 1 d . . . 
H59A H -0.5341 -0.3194 -0.3629 0.042 Uiso 1 1 calc R . . 
H59B H -0.5737 -0.2621 -0.4099 0.042 Uiso 1 1 calc R . . 
H59C H -0.5474 -0.2326 -0.3270 0.042 Uiso 1 1 calc R . . 
C61 C 0.6868(2) -0.1926(2) 0.14711(17) 0.0159(6) Uani 1 1 d . . . 
C62 C 0.6924(2) -0.1326(2) 0.08531(17) 0.0154(6) Uani 1 1 d . . . 
C63 C 0.7843(2) -0.0879(2) 0.09545(18) 0.0168(6) Uani 1 1 d . . . 
C64 C 0.8339(2) -0.0424(2) 0.04777(19) 0.0191(6) Uani 1 1 d . . . 
H64 H 0.8115 -0.0357 0.0022 0.023 Uiso 1 1 calc R . . 
C65 C 0.9172(2) -0.0066(2) 0.0684(2) 0.0216(7) Uani 1 1 d . . . 
H65 H 0.9512 0.0267 0.0374 0.026 Uiso 1 1 calc R . . 
C66 C 0.9510(2) -0.0193(2) 0.1343(2) 0.0212(7) Uani 1 1 d . . . 
H66 H 1.0081 0.0041 0.1470 0.025 Uiso 1 1 calc R . . 
C67 C 0.9014(2) -0.0662(2) 0.18171(19) 0.0187(6) Uani 1 1 d . . . 
H67 H 0.9240 -0.0754 0.2264 0.022 Uiso 1 1 calc R . . 
C68 C 0.8181(2) -0.0988(2) 0.16118(17) 0.0153(6) Uani 1 1 d . . . 
C69 C 0.7399(2) -0.1081(2) 0.26743(17) 0.0168(6) Uani 1 1 d . . . 
C70 C 0.6554(2) -0.1336(2) 0.29748(18) 0.0207(7) Uani 1 1 d . . . 
H70A H 0.6443 -0.0864 0.3290 0.025 Uiso 1 1 calc R . . 
H70B H 0.6554 -0.1791 0.3273 0.025 Uiso 1 1 calc R . . 
C71 C 0.5857(2) -0.1620(2) 0.23937(19) 0.0192(6) Uani 1 1 d . . . 
H71A H 0.5786 -0.1138 0.2155 0.023 Uiso 1 1 calc R . . 
H71B H 0.5330 -0.1844 0.2620 0.023 Uiso 1 1 calc R . . 
C72 C 0.6035(2) -0.2281(2) 0.18285(18) 0.0168(6) Uani 1 1 d . . . 
C73 C 0.6125(2) -0.3044(2) 0.2198(2) 0.0214(7) Uani 1 1 d . . . 
H73A H 0.6526 -0.2856 0.2615 0.026 Uiso 1 1 calc R . . 
H73B H 0.5580 -0.3295 0.2385 0.026 Uiso 1 1 calc R . . 
C74 C 0.6418(2) -0.3716(2) 0.1714(2) 0.0252(8) Uani 1 1 d . . . 
H74A H 0.6474 -0.4173 0.1992 0.030 Uiso 1 1 calc R . . 
H74B H 0.6007 -0.3941 0.1309 0.030 Uiso 1 1 calc R . . 
C75 C 0.7260(2) -0.3320(2) 0.1430(2) 0.0233(7) Uani 1 1 d . . . 
H75A H 0.7683 -0.3144 0.1831 0.028 Uiso 1 1 calc R . . 
H75B H 0.7444 -0.3723 0.1085 0.028 Uiso 1 1 calc R . . 
C76 C 0.7089(2) -0.2633(2) 0.03502(19) 0.0208(7) Uani 1 1 d . . . 
C77 C 0.6776(2) -0.1899(2) 0.01581(18) 0.0203(7) Uani 1 1 d . . . 
H77A H 0.6177 -0.2060 0.0009 0.024 Uiso 1 1 calc R . . 
H77B H 0.7093 -0.1638 -0.0232 0.024 Uiso 1 1 calc R . . 
C78 C 0.5314(2) -0.2517(2) 0.1237(2) 0.0217(7) Uani 1 1 d . . . 
H78A H 0.5286 -0.2017 0.1008 0.026 Uiso 1 1 calc R . . 
H78B H 0.5454 -0.2922 0.0864 0.026 Uiso 1 1 calc R . . 
C79 C 0.4454(2) -0.2883(3) 0.1501(2) 0.0284(8) Uani 1 1 d . . . 
H79A H 0.4457 -0.3409 0.1687 0.043 Uiso 1 1 calc R . . 
H79B H 0.4039 -0.2977 0.1101 0.043 Uiso 1 1 calc R . . 
H79C H 0.4315 -0.2498 0.1883 0.043 Uiso 1 1 calc R . . 
C80 C 0.3848(3) -0.2765(3) -0.0899(2) 0.0262(8) Uani 1 1 d . . . 
H80 H 0.3290 -0.3096 -0.0789 0.031 Uiso 1 1 calc R . . 
C81 C 0.8780(3) -0.2850(3) -0.1018(2) 0.0309(9) Uani 1 1 d . . . 
H81 H 0.8318 -0.3158 -0.0746 0.037 Uiso 1 1 calc R . . 
C82 C -0.6278(3) -0.5393(3) -0.4100(3) 0.0338(9) Uani 1 1 d . . . 
H82 H -0.6373 -0.5982 -0.4311 0.041 Uiso 1 1 calc R . . 
C83 C -0.8494(3) -0.4623(3) -0.5980(3) 0.0437(12) Uani 1 1 d . . . 
H83 H -0.7967 -0.4203 -0.5832 0.052 Uiso 1 1 calc R . . 
C84 C -0.6033(2) -0.2864(3) -0.6108(2) 0.0280(8) Uani 1 1 d . . . 
H84 H -0.6324 -0.2960 -0.5652 0.034 Uiso 1 1 calc R . . 
C85 C -0.1194(3) -0.2831(3) 0.3831(2) 0.0275(8) Uani 1 1 d . . . 
H85 H -0.1713 -0.3103 0.4058 0.033 Uiso 1 1 calc R . . 
C86 C -0.1322(3) -0.5447(3) 0.1233(3) 0.0404(11) Uani 1 1 d . . . 
H86 H -0.1358 -0.6048 0.1098 0.048 Uiso 1 1 calc R . . 
C87 C 0.3612(3) -0.5427(3) 0.1157(2) 0.0347(9) Uani 1 1 d . . . 
H87 H 0.3446 -0.6032 0.0995 0.042 Uiso 1 1 calc R . . 
Cl1 Cl 0.41321(8) -0.19044(8) -0.02445(7) 0.0448(3) Uani 1 1 d . . . 
Cl2 Cl 0.45692(10) -0.33898(10) -0.08723(11) 0.0669(5) Uani 1 1 d . . . 
Cl3 Cl 0.37695(11) -0.24350(12) -0.17491(7) 0.0654(4) Uani 1 1 d . . . 
Cl4 Cl 0.91211(10) -0.18518(9) -0.05583(9) 0.0570(4) Uani 1 1 d . . . 
Cl5 Cl 0.95669(13) -0.33967(15) -0.10503(14) 0.0883(7) Uani 1 1 d . . . 
Cl6 Cl 0.83742(13) -0.28016(11) -0.18852(7) 0.0649(4) Uani 1 1 d . . . 
Cl7 Cl -0.70941(8) -0.52977(8) -0.35367(8) 0.0490(3) Uani 1 1 d . . . 
Cl8 Cl -0.62618(11) -0.47723(9) -0.48057(8) 0.0571(4) Uani 1 1 d . . . 
Cl9 Cl -0.53182(9) -0.51274(10) -0.35991(11) 0.0626(4) Uani 1 1 d . . . 
Cl10 Cl -0.83194(10) -0.52202(8) -0.67662(8) 0.0540(4) Uani 1 1 d . . . 
Cl11 Cl -0.87541(13) -0.52402(11) -0.52754(9) 0.0692(5) Uani 1 1 d . . . 
Cl12 Cl -0.92709(16) -0.40989(19) -0.61429(17) 0.1149(10) Uani 1 1 d . . . 
Cl13 Cl -0.49430(7) -0.26810(8) -0.59187(6) 0.0411(3) Uani 1 1 d . . . 
Cl14 Cl -0.62942(7) -0.20037(7) -0.64446(7) 0.0388(2) Uani 1 1 d . . . 
Cl15 Cl -0.63655(8) -0.37525(7) -0.67237(7) 0.0429(3) Uani 1 1 d . . . 
Cl16 Cl -0.13687(7) -0.19428(7) 0.34903(6) 0.0355(2) Uani 1 1 d . . . 
Cl17 Cl -0.09804(7) -0.35394(8) 0.31303(6) 0.0395(3) Uani 1 1 d . . . 
Cl18 Cl -0.03820(10) -0.25682(10) 0.44945(8) 0.0573(4) Uani 1 1 d . . . 
Cl19 Cl -0.05243(7) -0.50818(7) 0.19002(7) 0.0409(3) Uani 1 1 d . . . 
Cl20 Cl -0.22919(8) -0.53355(8) 0.15653(8) 0.0479(3) Uani 1 1 d . . . 
Cl21 Cl -0.11091(15) -0.49366(10) 0.04584(8) 0.0812(7) Uani 1 1 d . . . 
Cl22 Cl 0.27198(9) -0.50880(9) 0.14161(9) 0.0543(4) Uani 1 1 d . . . 
Cl23 Cl 0.43363(9) -0.52649(9) 0.18986(9) 0.0531(3) Uani 1 1 d . . . 
Cl24 Cl 0.40780(14) -0.49186(12) 0.04511(8) 0.0840(7) Uani 1 1 d . . . 
  
loop_ 
 _atom_site_aniso_label 
 _atom_site_aniso_U_11 
 _atom_site_aniso_U_22 
 _atom_site_aniso_U_33 
 _atom_site_aniso_U_23 
 _atom_site_aniso_U_13 
 _atom_site_aniso_U_12 
O1 0.0153(11) 0.0241(12) 0.0142(11) 0.0002(9) 0.0032(8) 0.0078(9) 
O2 0.0219(12) 0.0305(14) 0.0176(12) -0.0047(10) 0.0022(9) 0.0071(10) 
O3 0.0277(14) 0.0273(14) 0.0241(13) -0.0099(11) 0.0115(11) 0.0023(11) 
O4 0.0192(12) 0.0269(13) 0.0147(11) -0.0021(9) 0.0006(9) 0.0101(10) 
O5 0.0239(13) 0.0333(15) 0.0161(12) -0.0058(10) 0.0012(10) 0.0083(11) 
O6 0.0341(15) 0.0234(13) 0.0244(13) -0.0073(10) 0.0137(11) 0.0037(11) 
O7 0.0217(12) 0.0219(12) 0.0162(11) -0.0012(9) -0.0001(9) 0.0101(9) 
O8 0.0216(12) 0.0312(14) 0.0179(12) -0.0029(10) 0.0020(9) 0.0075(10) 
O9 0.0313(15) 0.0267(14) 0.0260(14) -0.0090(11) 0.0123(11) 0.0001(11) 
O10 0.0158(11) 0.0225(12) 0.0169(11) 0.0006(9) 0.0025(8) 0.0070(9) 
O11 0.0189(12) 0.0271(13) 0.0173(11) -0.0030(10) 0.0019(9) 0.0069(10) 
O12 0.0334(15) 0.0252(14) 0.0266(14) -0.0065(11) 0.0136(11) 0.0050(11) 
N1 0.0120(12) 0.0195(13) 0.0133(12) 0.0004(10) 0.0038(9) 0.0035(10) 
N2 0.0162(13) 0.0183(13) 0.0198(14) -0.0034(10) 0.0085(10) 0.0045(10) 
N3 0.0175(13) 0.0193(13) 0.0125(12) 0.0000(10) 0.0038(10) 0.0051(10) 
N4 0.0169(13) 0.0196(14) 0.0174(13) -0.0020(10) 0.0060(10) 0.0047(10) 
N5 0.0137(12) 0.0204(14) 0.0133(12) 0.0001(10) 0.0026(9) 0.0046(10) 
N6 0.0184(13) 0.0221(14) 0.0175(13) -0.0014(11) 0.0075(10) 0.0063(11) 
N7 0.0139(12) 0.0190(13) 0.0118(12) -0.0002(10) 0.0043(9) 0.0046(10) 
N8 0.0188(13) 0.0163(13) 0.0193(13) -0.0022(10) 0.0079(10) 0.0055(10) 
C1 0.0141(14) 0.0166(15) 0.0150(14) 0.0006(11) 0.0044(11) 0.0054(11) 
C2 0.0139(14) 0.0240(16) 0.0141(14) 0.0005(12) 0.0045(11) 0.0063(12) 
C3 0.0131(14) 0.0201(16) 0.0167(14) -0.0019(12) 0.0057(11) 0.0041(11) 
C4 0.0196(16) 0.0225(16) 0.0174(15) 0.0028(12) 0.0082(12) 0.0051(13) 
C5 0.0174(15) 0.0214(17) 0.0253(17) -0.0002(13) 0.0106(13) 0.0027(12) 
C6 0.0151(15) 0.0236(17) 0.0263(17) -0.0019(13) 0.0068(13) 0.0045(12) 
C7 0.0171(15) 0.0238(17) 0.0183(15) -0.0004(12) 0.0034(12) 0.0071(12) 
C8 0.0143(14) 0.0185(15) 0.0177(15) -0.0005(12) 0.0059(11) 0.0048(11) 
C9 0.0187(15) 0.0187(15) 0.0149(14) 0.0007(11) 0.0034(11) 0.0074(12) 
C10 0.0226(16) 0.0241(17) 0.0167(15) 0.0012(12) 0.0082(12) 0.0050(13) 
C11 0.0159(15) 0.0237(17) 0.0181(15) -0.0001(12) 0.0065(12) 0.0053(12) 
C12 0.0152(14) 0.0219(16) 0.0166(15) 0.0010(12) 0.0063(11) 0.0024(12) 
C13 0.0189(16) 0.0209(17) 0.0250(17) 0.0016(13) 0.0089(13) 0.0041(12) 
C14 0.0211(17) 0.0195(17) 0.035(2) 0.0016(14) 0.0112(15) 0.0037(13) 
C15 0.0198(16) 0.0189(16) 0.0333(19) -0.0010(14) 0.0107(14) 0.0072(13) 
C16 0.0155(15) 0.0212(16) 0.0232(17) -0.0048(13) 0.0080(12) 0.0000(12) 
C17 0.0186(15) 0.0258(17) 0.0159(15) -0.0018(12) 0.0042(12) 0.0039(13) 
C18 0.0145(15) 0.0259(18) 0.0255(17) 0.0006(14) 0.0059(13) 0.0043(13) 
C19 0.0170(16) 0.0277(19) 0.0310(19) -0.0004(15) 0.0048(14) 0.0026(13) 
C21 0.0166(14) 0.0158(14) 0.0144(14) -0.0016(11) 0.0033(11) 0.0056(11) 
C22 0.0178(15) 0.0233(16) 0.0109(13) 0.0012(11) 0.0034(11) 0.0080(12) 
C23 0.0192(15) 0.0203(16) 0.0155(14) -0.0008(12) 0.0057(12) 0.0066(12) 
C24 0.0235(17) 0.0230(17) 0.0152(15) 0.0024(12) 0.0068(12) 0.0066(13) 
C25 0.0218(17) 0.0218(17) 0.0222(17) 0.0010(13) 0.0109(13) 0.0032(13) 
C26 0.0137(15) 0.0233(17) 0.0263(17) -0.0042(13) 0.0056(12) 0.0051(12) 
C27 0.0175(15) 0.0205(16) 0.0187(15) -0.0004(12) 0.0029(12) 0.0081(12) 
C28 0.0153(14) 0.0181(15) 0.0162(14) -0.0014(11) 0.0058(11) 0.0059(11) 
C29 0.0215(16) 0.0229(16) 0.0130(14) 0.0020(12) 0.0025(12) 0.0081(13) 
C30 0.0216(16) 0.0256(17) 0.0173(15) 0.0006(13) 0.0080(12) 0.0070(13) 
C31 0.0203(16) 0.0239(17) 0.0177(15) -0.0012(12) 0.0075(12) 0.0072(13) 
C32 0.0159(15) 0.0219(16) 0.0164(15) -0.0008(12) 0.0058(11) 0.0032(12) 
C33 0.0267(18) 0.0223(17) 0.0237(17) 0.0013(13) 0.0120(14) 0.0063(14) 
C34 0.0292(19) 0.0205(17) 0.0298(19) 0.0022(14) 0.0129(15) 0.0062(14) 
C35 0.0252(18) 0.0221(17) 0.0250(17) 0.0016(13) 0.0101(14) 0.0075(13) 
C36 0.0189(16) 0.0245(17) 0.0203(16) -0.0032(13) 0.0068(12) 0.0024(13) 
C37 0.0230(17) 0.0287(18) 0.0120(14) -0.0020(12) 0.0027(12) 0.0059(13) 
C38 0.0175(16) 0.033(2) 0.0232(17) -0.0046(14) 0.0042(13) 0.0022(14) 
C39 0.0193(18) 0.040(2) 0.035(2) -0.0068(18) 0.0056(15) -0.0051(16) 
C41 0.0170(15) 0.0186(15) 0.0133(14) -0.0010(11) 0.0025(11) 0.0055(12) 
C42 0.0174(15) 0.0216(16) 0.0121(14) -0.0023(11) 0.0010(11) 0.0059(12) 
C43 0.0178(15) 0.0208(16) 0.0137(14) -0.0010(11) 0.0039(11) 0.0061(12) 
C44 0.0221(17) 0.0282(18) 0.0133(14) -0.0006(12) 0.0042(12) 0.0051(13) 
C45 0.0204(16) 0.0240(17) 0.0186(16) -0.0010(13) 0.0093(13) 0.0013(13) 
C46 0.0157(15) 0.0271(18) 0.0240(17) -0.0041(14) 0.0059(13) 0.0032(13) 
C47 0.0175(15) 0.0250(17) 0.0172(15) -0.0001(12) 0.0011(12) 0.0076(13) 
C48 0.0150(14) 0.0187(15) 0.0153(14) 0.0001(11) 0.0035(11) 0.0049(11) 
C49 0.0216(16) 0.0218(16) 0.0118(14) 0.0016(11) 0.0030(11) 0.0093(12) 
C50 0.0215(16) 0.0258(17) 0.0162(15) -0.0009(13) 0.0069(12) 0.0058(13) 
C51 0.0178(15) 0.0236(17) 0.0186(15) -0.0009(12) 0.0059(12) 0.0062(12) 
C52 0.0155(14) 0.0209(16) 0.0173(15) -0.0006(12) 0.0046(11) 0.0049(12) 
C53 0.0204(16) 0.0232(17) 0.0202(16) 0.0003(13) 0.0073(13) 0.0051(13) 
C54 0.0240(18) 0.0208(17) 0.033(2) -0.0028(14) 0.0104(15) 0.0025(14) 
C55 0.0240(17) 0.0202(17) 0.0278(18) -0.0007(13) 0.0089(14) 0.0079(13) 
C56 0.0193(16) 0.0218(17) 0.0183(15) -0.0065(12) 0.0066(12) -0.0008(12) 
C57 0.0230(16) 0.0271(18) 0.0115(14) -0.0027(12) 0.0027(12) 0.0040(13) 
C58 0.0180(16) 0.0260(18) 0.0208(16) -0.0030(13) 0.0030(12) 0.0041(13) 
C59 0.0174(16) 0.031(2) 0.033(2) -0.0037(16) 0.0019(14) 0.0023(14) 
C61 0.0149(14) 0.0175(15) 0.0156(14) -0.0002(11) 0.0055(11) 0.0050(11) 
C62 0.0153(14) 0.0187(15) 0.0121(13) -0.0002(11) 0.0046(11) 0.0045(11) 
C63 0.0135(14) 0.0214(16) 0.0159(14) 0.0010(12) 0.0075(11) 0.0049(11) 
C64 0.0179(15) 0.0227(16) 0.0184(15) 0.0023(12) 0.0085(12) 0.0078(12) 
C65 0.0179(16) 0.0251(17) 0.0228(16) 0.0028(13) 0.0116(13) 0.0062(13) 
C66 0.0113(14) 0.0250(17) 0.0277(18) -0.0003(14) 0.0062(12) 0.0058(12) 
C67 0.0145(15) 0.0229(16) 0.0200(15) 0.0012(12) 0.0041(12) 0.0071(12) 
C68 0.0138(14) 0.0159(14) 0.0162(14) -0.0022(11) 0.0053(11) 0.0048(11) 
C69 0.0183(15) 0.0205(16) 0.0138(14) 0.0019(11) 0.0045(11) 0.0086(12) 
C70 0.0201(16) 0.0269(18) 0.0151(15) -0.0004(12) 0.0073(12) 0.0062(13) 
C71 0.0177(15) 0.0221(16) 0.0199(16) 0.0015(12) 0.0093(12) 0.0085(12) 
C72 0.0123(14) 0.0190(15) 0.0185(15) 0.0019(12) 0.0067(11) 0.0018(11) 
C73 0.0202(16) 0.0204(16) 0.0238(17) 0.0036(13) 0.0100(13) 0.0035(13) 
C74 0.0250(18) 0.0186(17) 0.0319(19) 0.0037(14) 0.0125(15) 0.0033(13) 
C75 0.0238(17) 0.0211(17) 0.0267(18) 0.0039(13) 0.0117(14) 0.0070(13) 
C76 0.0191(16) 0.0221(17) 0.0189(16) -0.0041(12) 0.0076(12) 0.0022(12) 
C77 0.0185(15) 0.0255(17) 0.0144(14) -0.0034(12) 0.0035(12) 0.0021(13) 
C78 0.0157(15) 0.0242(17) 0.0234(17) 0.0004(13) 0.0052(12) 0.0016(12) 
C79 0.0174(16) 0.029(2) 0.036(2) -0.0001(16) 0.0088(15) -0.0008(14) 
C80 0.0275(19) 0.0291(19) 0.0232(18) 0.0033(14) 0.0052(14) 0.0085(15) 
C81 0.031(2) 0.037(2) 0.0255(19) 0.0002(16) 0.0092(16) 0.0114(17) 
C82 0.030(2) 0.027(2) 0.042(2) -0.0056(17) 0.0086(17) 0.0045(16) 
C83 0.040(3) 0.029(2) 0.061(3) -0.004(2) 0.002(2) 0.0108(19) 
C84 0.0269(19) 0.034(2) 0.0207(17) -0.0002(15) 0.0093(14) 0.0019(15) 
C85 0.0284(19) 0.032(2) 0.0242(18) 0.0061(15) 0.0070(15) 0.0105(15) 
C86 0.048(3) 0.025(2) 0.040(2) -0.0108(18) 0.016(2) -0.0024(18) 
C87 0.040(2) 0.027(2) 0.033(2) -0.0060(16) 0.0106(18) 0.0023(17) 
Cl1 0.0384(6) 0.0437(6) 0.0435(6) -0.0119(5) 0.0073(5) -0.0017(5) 
Cl2 0.0511(8) 0.0559(9) 0.1020(14) -0.0005(8) 0.0039(8) 0.0340(7) 
Cl3 0.0778(11) 0.0857(12) 0.0299(6) 0.0217(7) -0.0022(6) 0.0065(9) 
Cl4 0.0614(9) 0.0381(7) 0.0631(9) -0.0058(6) -0.0122(7) 0.0008(6) 
Cl5 0.0661(11) 0.0999(15) 0.1194(18) 0.0067(13) 0.0138(11) 0.0633(11) 
Cl6 0.1047(13) 0.0668(10) 0.0272(6) 0.0028(6) -0.0083(7) 0.0301(9) 
Cl7 0.0451(7) 0.0444(7) 0.0606(8) 0.0040(6) 0.0235(6) 0.0155(5) 
Cl8 0.0860(11) 0.0441(7) 0.0376(7) -0.0001(5) 0.0102(7) 0.0093(7) 
Cl9 0.0348(7) 0.0543(8) 0.0950(13) 0.0094(8) -0.0090(7) 0.0032(6) 
Cl10 0.0598(8) 0.0363(6) 0.0576(8) -0.0033(6) 0.0133(6) -0.0034(6) 
Cl11 0.0943(13) 0.0555(9) 0.0522(9) -0.0094(7) 0.0090(8) 0.0120(8) 
Cl12 0.0925(16) 0.130(2) 0.151(3) 0.0149(18) -0.0003(16) 0.0850(17) 
Cl13 0.0329(5) 0.0534(7) 0.0317(5) 0.0041(5) -0.0017(4) -0.0006(5) 
Cl14 0.0413(6) 0.0344(5) 0.0427(6) 0.0076(4) 0.0158(5) 0.0099(4) 
Cl15 0.0384(6) 0.0342(6) 0.0506(7) -0.0097(5) -0.0022(5) 0.0038(4) 
Cl16 0.0315(5) 0.0391(6) 0.0403(6) 0.0173(4) 0.0034(4) 0.0113(4) 
Cl17 0.0397(6) 0.0477(6) 0.0334(5) 0.0002(5) 0.0153(4) 0.0158(5) 
Cl18 0.0657(9) 0.0589(8) 0.0504(8) -0.0022(6) -0.0274(7) 0.0277(7) 
Cl19 0.0348(5) 0.0282(5) 0.0543(7) -0.0069(5) 0.0170(5) -0.0005(4) 
Cl20 0.0417(6) 0.0397(6) 0.0626(8) -0.0050(6) 0.0053(6) 0.0149(5) 
Cl21 0.1354(17) 0.0491(8) 0.0349(7) -0.0084(6) 0.0210(9) -0.0247(9) 
Cl22 0.0401(7) 0.0450(7) 0.0798(10) -0.0009(7) 0.0087(6) 0.0169(5) 
Cl23 0.0531(8) 0.0455(7) 0.0594(8) -0.0089(6) -0.0084(6) 0.0165(6) 
Cl24 0.1131(15) 0.0707(11) 0.0373(7) -0.0113(7) 0.0306(8) -0.0376(10) 
  
_geom_special_details 
; 
 All esds (except the esd in the dihedral angle between two l.s. planes) 
 are estimated using the full covariance matrix.  The cell esds are taken 
 into account individually in the estimation of esds in distances, angles 
 and torsion angles; correlations between esds in cell parameters are only 
 used when they are defined by crystal symmetry.  An approximate (isotropic) 
 treatment of cell esds is used for estimating esds involving l.s. planes. 
; 
  
loop_ 
 _geom_bond_atom_site_label_1 
 _geom_bond_atom_site_label_2 
 _geom_bond_distance 
 _geom_bond_site_symmetry_2 
 _geom_bond_publ_flag 
O1 C2 1.407(4) . ? 
O1 H1 0.8400 . ? 
O2 C9 1.237(4) . ? 
O3 C16 1.238(4) . ? 
O4 C22 1.412(4) . ? 
O4 H4A 0.8400 . ? 
O5 C29 1.230(4) . ? 
O6 C36 1.237(4) . ? 
O7 C42 1.414(4) . ? 
O7 H7A 0.8400 . ? 
O8 C49 1.230(4) . ? 
O9 C56 1.236(4) . ? 
O10 C62 1.411(4) . ? 
O10 H10 0.8400 . ? 
O11 C69 1.239(4) . ? 
O12 C76 1.239(4) . ? 
N1 C9 1.383(4) . ? 
N1 C8 1.444(4) . ? 
N1 C1 1.501(4) . ? 
N2 C16 1.359(5) . ? 
N2 C15 1.458(5) . ? 
N2 C1 1.473(4) . ? 
N3 C29 1.383(4) . ? 
N3 C28 1.442(4) . ? 
N3 C21 1.500(4) . ? 
N4 C36 1.356(5) . ? 
N4 C35 1.466(5) . ? 
N4 C21 1.476(4) . ? 
N5 C49 1.391(4) . ? 
N5 C48 1.443(4) . ? 
N5 C41 1.497(4) . ? 
N6 C56 1.361(5) . ? 
N6 C55 1.460(5) . ? 
N6 C41 1.480(4) . ? 
N7 C69 1.379(4) . ? 
N7 C68 1.442(4) . ? 
N7 C61 1.504(4) . ? 
N8 C76 1.357(5) . ? 
N8 C75 1.465(5) . ? 
N8 C61 1.476(4) . ? 
C1 C12 1.572(4) . ? 
C1 C2 1.596(5) . ? 
C2 C3 1.524(5) . ? 
C2 C17 1.530(5) . ? 
C3 C4 1.391(4) . ? 
C3 C8 1.394(5) . ? 
C4 C5 1.390(5) . ? 
C4 H4 0.9500 . ? 
C5 C6 1.404(6) . ? 
C5 H5 0.9500 . ? 
C6 C7 1.404(5) . ? 
C6 H6 0.9500 . ? 
C7 C8 1.388(5) . ? 
C7 H7 0.9500 . ? 
C9 C10 1.504(5) . ? 
C10 C11 1.529(5) . ? 
C10 H10A 0.9900 . ? 
C10 H10B 0.9900 . ? 
C11 C12 1.547(5) . ? 
C11 H11A 0.9900 . ? 
C11 H11B 0.9900 . ? 
C12 C13 1.553(5) . ? 
C12 C18 1.557(5) . ? 
C13 C14 1.528(5) . ? 
C13 H13A 0.9900 . ? 
C13 H13B 0.9900 . ? 
C14 C15 1.534(5) . ? 
C14 H14A 0.9900 . ? 
C14 H14B 0.9900 . ? 
C15 H15A 0.9900 . ? 
C15 H15B 0.9900 . ? 
C16 C17 1.503(5) . ? 
C17 H17A 0.9900 . ? 
C17 H17B 0.9900 . ? 
C18 C19 1.534(5) . ? 
C18 H18A 0.9900 . ? 
C18 H18B 0.9900 . ? 
C19 H19A 0.9800 . ? 
C19 H19B 0.9800 . ? 
C19 H19C 0.9800 . ? 
C21 C32 1.567(4) . ? 
C21 C22 1.603(5) . ? 
C22 C37 1.523(5) . ? 
C22 C23 1.528(5) . ? 
C23 C28 1.383(5) . ? 
C23 C24 1.395(5) . ? 
C24 C25 1.408(5) . ? 
C24 H24 0.9500 . ? 
C25 C26 1.391(5) . ? 
C25 H25 0.9500 . ? 
C26 C27 1.402(5) . ? 
C26 H26 0.9500 . ? 
C27 C28 1.389(5) . ? 
C27 H27 0.9500 . ? 
C29 C30 1.511(5) . ? 
C30 C31 1.533(5) . ? 
C30 H30A 0.9900 . ? 
C30 H30B 0.9900 . ? 
C31 C32 1.544(5) . ? 
C31 H31A 0.9900 . ? 
C31 H31B 0.9900 . ? 
C32 C38 1.555(5) . ? 
C32 C33 1.558(5) . ? 
C33 C34 1.536(5) . ? 
C33 H33A 0.9900 . ? 
C33 H33B 0.9900 . ? 
C34 C35 1.526(5) . ? 
C34 H34A 0.9900 . ? 
C34 H34B 0.9900 . ? 
C35 H35A 0.9900 . ? 
C35 H35B 0.9900 . ? 
C36 C37 1.514(5) . ? 
C37 H37A 0.9900 . ? 
C37 H37B 0.9900 . ? 
C38 C39 1.535(5) . ? 
C38 H38A 0.9900 . ? 
C38 H38B 0.9900 . ? 
C39 H39A 0.9800 . ? 
C39 H39B 0.9800 . ? 
C39 H39C 0.9800 . ? 
C41 C52 1.563(4) . ? 
C41 C42 1.596(5) . ? 
C42 C57 1.523(5) . ? 
C42 C43 1.529(5) . ? 
C43 C48 1.388(5) . ? 
C43 C44 1.396(5) . ? 
C44 C45 1.400(5) . ? 
C44 H44 0.9500 . ? 
C45 C46 1.402(6) . ? 
C45 H45 0.9500 . ? 
C46 C47 1.402(5) . ? 
C46 H46 0.9500 . ? 
C47 C48 1.385(5) . ? 
C47 H47 0.9500 . ? 
C49 C50 1.508(5) . ? 
C50 C51 1.537(5) . ? 
C50 H50A 0.9900 . ? 
C50 H50B 0.9900 . ? 
C51 C52 1.538(5) . ? 
C51 H51A 0.9900 . ? 
C51 H51B 0.9900 . ? 
C52 C58 1.555(5) . ? 
C52 C53 1.562(5) . ? 
C53 C54 1.535(5) . ? 
C53 H53A 0.9900 . ? 
C53 H53B 0.9900 . ? 
C54 C55 1.528(5) . ? 
C54 H54A 0.9900 . ? 
C54 H54B 0.9900 . ? 
C55 H55A 0.9900 . ? 
C55 H55B 0.9900 . ? 
C56 C57 1.513(5) . ? 
C57 H57A 0.9900 . ? 
C57 H57B 0.9900 . ? 
C58 C59 1.531(5) . ? 
C58 H58A 0.9900 . ? 
C58 H58B 0.9900 . ? 
C59 H59A 0.9800 . ? 
C59 H59B 0.9800 . ? 
C59 H59C 0.9800 . ? 
C61 C72 1.565(4) . ? 
C61 C62 1.602(5) . ? 
C62 C77 1.516(5) . ? 
C62 C63 1.531(4) . ? 
C63 C68 1.388(5) . ? 
C63 C64 1.393(4) . ? 
C64 C65 1.400(5) . ? 
C64 H64 0.9500 . ? 
C65 C66 1.401(5) . ? 
C65 H65 0.9500 . ? 
C66 C67 1.401(5) . ? 
C66 H66 0.9500 . ? 
C67 C68 1.390(5) . ? 
C67 H67 0.9500 . ? 
C69 C70 1.505(5) . ? 
C70 C71 1.525(5) . ? 
C70 H70A 0.9900 . ? 
C70 H70B 0.9900 . ? 
C71 C72 1.533(5) . ? 
C71 H71A 0.9900 . ? 
C71 H71B 0.9900 . ? 
C72 C73 1.550(5) . ? 
C72 C78 1.561(5) . ? 
C73 C74 1.541(5) . ? 
C73 H73A 0.9900 . ? 
C73 H73B 0.9900 . ? 
C74 C75 1.532(5) . ? 
C74 H74A 0.9900 . ? 
C74 H74B 0.9900 . ? 
C75 H75A 0.9900 . ? 
C75 H75B 0.9900 . ? 
C76 C77 1.509(5) . ? 
C77 H77A 0.9900 . ? 
C77 H77B 0.9900 . ? 
C78 C79 1.530(5) . ? 
C78 H78A 0.9900 . ? 
C78 H78B 0.9900 . ? 
C79 H79A 0.9800 . ? 
C79 H79B 0.9800 . ? 
C79 H79C 0.9800 . ? 
C80 Cl3 1.751(4) . ? 
C80 Cl2 1.758(4) . ? 
C80 Cl1 1.762(4) . ? 
C80 H80 1.0000 . ? 
C81 Cl5 1.750(5) . ? 
C81 Cl4 1.762(5) . ? 
C81 Cl6 1.763(5) . ? 
C81 H81 1.0000 . ? 
C82 Cl7 1.756(4) . ? 
C82 Cl8 1.763(5) . ? 
C82 Cl9 1.766(5) . ? 
C82 H82 1.0000 . ? 
C83 Cl12 1.749(5) . ? 
C83 Cl10 1.760(6) . ? 
C83 Cl11 1.763(6) . ? 
C83 H83 1.0000 . ? 
C84 Cl15 1.758(4) . ? 
C84 Cl14 1.766(5) . ? 
C84 Cl13 1.779(4) . ? 
C84 H84 1.0000 . ? 
C85 Cl16 1.756(4) . ? 
C85 Cl18 1.757(4) . ? 
C85 Cl17 1.774(4) . ? 
C85 H85 1.0000 . ? 
C86 Cl19 1.755(5) . ? 
C86 Cl21 1.763(5) . ? 
C86 Cl20 1.773(5) . ? 
C86 H86 1.0000 . ? 
C87 Cl24 1.746(5) . ? 
C87 Cl22 1.756(5) . ? 
C87 Cl23 1.772(5) . ? 
C87 H87 1.0000 . ? 
  
loop_ 
 _geom_angle_atom_site_label_1 
 _geom_angle_atom_site_label_2 
 _geom_angle_atom_site_label_3 
 _geom_angle 
 _geom_angle_site_symmetry_1 
 _geom_angle_site_symmetry_3 
 _geom_angle_publ_flag 
C2 O1 H1 109.5 . . ? 
C22 O4 H4A 109.5 . . ? 
C42 O7 H7A 109.5 . . ? 
C62 O10 H10 109.5 . . ? 
C9 N1 C8 116.3(3) . . ? 
C9 N1 C1 125.0(3) . . ? 
C8 N1 C1 106.4(2) . . ? 
C16 N2 C15 122.1(3) . . ? 
C16 N2 C1 113.8(3) . . ? 
C15 N2 C1 120.7(3) . . ? 
C29 N3 C28 116.2(3) . . ? 
C29 N3 C21 125.6(3) . . ? 
C28 N3 C21 106.7(2) . . ? 
C36 N4 C35 121.3(3) . . ? 
C36 N4 C21 114.9(3) . . ? 
C35 N4 C21 120.7(3) . . ? 
C49 N5 C48 116.6(3) . . ? 
C49 N5 C41 125.0(3) . . ? 
C48 N5 C41 106.7(3) . . ? 
C56 N6 C55 121.3(3) . . ? 
C56 N6 C41 113.4(3) . . ? 
C55 N6 C41 121.0(3) . . ? 
C69 N7 C68 116.5(3) . . ? 
C69 N7 C61 125.1(3) . . ? 
C68 N7 C61 106.7(2) . . ? 
C76 N8 C75 122.2(3) . . ? 
C76 N8 C61 114.3(3) . . ? 
C75 N8 C61 120.4(3) . . ? 
N2 C1 N1 108.9(3) . . ? 
N2 C1 C12 109.3(3) . . ? 
N1 C1 C12 112.2(3) . . ? 
N2 C1 C2 99.4(2) . . ? 
N1 C1 C2 103.1(2) . . ? 
C12 C1 C2 122.7(3) . . ? 
O1 C2 C3 114.5(3) . . ? 
O1 C2 C17 111.4(3) . . ? 
C3 C2 C17 110.0(3) . . ? 
O1 C2 C1 115.8(2) . . ? 
C3 C2 C1 99.8(3) . . ? 
C17 C2 C1 104.4(3) . . ? 
C4 C3 C8 119.6(3) . . ? 
C4 C3 C2 128.8(3) . . ? 
C8 C3 C2 111.6(3) . . ? 
C5 C4 C3 119.3(3) . . ? 
C5 C4 H4 120.3 . . ? 
C3 C4 H4 120.3 . . ? 
C4 C5 C6 120.6(3) . . ? 
C4 C5 H5 119.7 . . ? 
C6 C5 H5 119.7 . . ? 
C5 C6 C7 120.6(3) . . ? 
C5 C6 H6 119.7 . . ? 
C7 C6 H6 119.7 . . ? 
C8 C7 C6 117.5(3) . . ? 
C8 C7 H7 121.2 . . ? 
C6 C7 H7 121.2 . . ? 
C7 C8 C3 122.4(3) . . ? 
C7 C8 N1 128.7(3) . . ? 
C3 C8 N1 108.9(3) . . ? 
O2 C9 N1 119.5(3) . . ? 
O2 C9 C10 121.6(3) . . ? 
N1 C9 C10 118.9(3) . . ? 
C9 C10 C11 113.3(3) . . ? 
C9 C10 H10A 108.9 . . ? 
C11 C10 H10A 108.9 . . ? 
C9 C10 H10B 108.9 . . ? 
C11 C10 H10B 108.9 . . ? 
H10A C10 H10B 107.7 . . ? 
C10 C11 C12 112.0(3) . . ? 
C10 C11 H11A 109.2 . . ? 
C12 C11 H11A 109.2 . . ? 
C10 C11 H11B 109.2 . . ? 
C12 C11 H11B 109.2 . . ? 
H11A C11 H11B 107.9 . . ? 
C11 C12 C13 109.2(3) . . ? 
C11 C12 C18 109.9(3) . . ? 
C13 C12 C18 111.8(3) . . ? 
C11 C12 C1 108.9(3) . . ? 
C13 C12 C1 108.5(3) . . ? 
C18 C12 C1 108.6(3) . . ? 
C14 C13 C12 114.9(3) . . ? 
C14 C13 H13A 108.5 . . ? 
C12 C13 H13A 108.5 . . ? 
C14 C13 H13B 108.5 . . ? 
C12 C13 H13B 108.5 . . ? 
H13A C13 H13B 107.5 . . ? 
C13 C14 C15 108.5(3) . . ? 
C13 C14 H14A 110.0 . . ? 
C15 C14 H14A 110.0 . . ? 
C13 C14 H14B 110.0 . . ? 
C15 C14 H14B 110.0 . . ? 
H14A C14 H14B 108.4 . . ? 
N2 C15 C14 108.5(3) . . ? 
N2 C15 H15A 110.0 . . ? 
C14 C15 H15A 110.0 . . ? 
N2 C15 H15B 110.0 . . ? 
C14 C15 H15B 110.0 . . ? 
H15A C15 H15B 108.4 . . ? 
O3 C16 N2 125.0(4) . . ? 
O3 C16 C17 125.3(4) . . ? 
N2 C16 C17 109.7(3) . . ? 
C16 C17 C2 103.3(3) . . ? 
C16 C17 H17A 111.1 . . ? 
C2 C17 H17A 111.1 . . ? 
C16 C17 H17B 111.1 . . ? 
C2 C17 H17B 111.1 . . ? 
H17A C17 H17B 109.1 . . ? 
C19 C18 C12 114.8(3) . . ? 
C19 C18 H18A 108.6 . . ? 
C12 C18 H18A 108.6 . . ? 
C19 C18 H18B 108.6 . . ? 
C12 C18 H18B 108.6 . . ? 
H18A C18 H18B 107.5 . . ? 
C18 C19 H19A 109.5 . . ? 
C18 C19 H19B 109.5 . . ? 
H19A C19 H19B 109.5 . . ? 
C18 C19 H19C 109.5 . . ? 
H19A C19 H19C 109.5 . . ? 
H19B C19 H19C 109.5 . . ? 
N4 C21 N3 109.4(3) . . ? 
N4 C21 C32 109.6(3) . . ? 
N3 C21 C32 112.7(3) . . ? 
N4 C21 C22 98.7(2) . . ? 
N3 C21 C22 103.0(3) . . ? 
C32 C21 C22 122.1(3) . . ? 
O4 C22 C37 111.4(3) . . ? 
O4 C22 C23 113.2(3) . . ? 
C37 C22 C23 110.0(3) . . ? 
O4 C22 C21 116.2(3) . . ? 
C37 C22 C21 105.4(3) . . ? 
C23 C22 C21 99.9(3) . . ? 
C28 C23 C24 120.1(3) . . ? 
C28 C23 C22 111.5(3) . . ? 
C24 C23 C22 128.3(3) . . ? 
C23 C24 C25 118.3(3) . . ? 
C23 C24 H24 120.8 . . ? 
C25 C24 H24 120.8 . . ? 
C26 C25 C24 120.5(3) . . ? 
C26 C25 H25 119.7 . . ? 
C24 C25 H25 119.7 . . ? 
C25 C26 C27 121.1(3) . . ? 
C25 C26 H26 119.4 . . ? 
C27 C26 H26 119.4 . . ? 
C28 C27 C26 117.3(3) . . ? 
C28 C27 H27 121.4 . . ? 
C26 C27 H27 121.4 . . ? 
C23 C28 C27 122.6(3) . . ? 
C23 C28 N3 109.6(3) . . ? 
C27 C28 N3 127.8(3) . . ? 
O5 C29 N3 120.3(3) . . ? 
O5 C29 C30 121.5(3) . . ? 
N3 C29 C30 118.2(3) . . ? 
C29 C30 C31 112.8(3) . . ? 
C29 C30 H30A 109.0 . . ? 
C31 C30 H30A 109.0 . . ? 
C29 C30 H30B 109.0 . . ? 
C31 C30 H30B 109.0 . . ? 
H30A C30 H30B 107.8 . . ? 
C30 C31 C32 111.9(3) . . ? 
C30 C31 H31A 109.2 . . ? 
C32 C31 H31A 109.2 . . ? 
C30 C31 H31B 109.2 . . ? 
C32 C31 H31B 109.2 . . ? 
H31A C31 H31B 107.9 . . ? 
C31 C32 C38 109.6(3) . . ? 
C31 C32 C33 108.6(3) . . ? 
C38 C32 C33 111.5(3) . . ? 
C31 C32 C21 109.2(3) . . ? 
C38 C32 C21 109.6(3) . . ? 
C33 C32 C21 108.3(3) . . ? 
C34 C33 C32 114.8(3) . . ? 
C34 C33 H33A 108.6 . . ? 
C32 C33 H33A 108.6 . . ? 
C34 C33 H33B 108.6 . . ? 
C32 C33 H33B 108.6 . . ? 
H33A C33 H33B 107.6 . . ? 
C35 C34 C33 107.7(3) . . ? 
C35 C34 H34A 110.2 . . ? 
C33 C34 H34A 110.2 . . ? 
C35 C34 H34B 110.2 . . ? 
C33 C34 H34B 110.2 . . ? 
H34A C34 H34B 108.5 . . ? 
N4 C35 C34 108.4(3) . . ? 
N4 C35 H35A 110.0 . . ? 
C34 C35 H35A 110.0 . . ? 
N4 C35 H35B 110.0 . . ? 
C34 C35 H35B 110.0 . . ? 
H35A C35 H35B 108.4 . . ? 
O6 C36 N4 124.5(4) . . ? 
O6 C36 C37 126.0(3) . . ? 
N4 C36 C37 109.5(3) . . ? 
C36 C37 C22 102.7(3) . . ? 
C36 C37 H37A 111.2 . . ? 
C22 C37 H37A 111.2 . . ? 
C36 C37 H37B 111.2 . . ? 
C22 C37 H37B 111.2 . . ? 
H37A C37 H37B 109.1 . . ? 
C39 C38 C32 114.8(3) . . ? 
C39 C38 H38A 108.6 . . ? 
C32 C38 H38A 108.6 . . ? 
C39 C38 H38B 108.6 . . ? 
C32 C38 H38B 108.6 . . ? 
H38A C38 H38B 107.5 . . ? 
C38 C39 H39A 109.5 . . ? 
C38 C39 H39B 109.5 . . ? 
H39A C39 H39B 109.5 . . ? 
C38 C39 H39C 109.5 . . ? 
H39A C39 H39C 109.5 . . ? 
H39B C39 H39C 109.5 . . ? 
N6 C41 N5 109.1(3) . . ? 
N6 C41 C52 109.0(3) . . ? 
N5 C41 C52 112.5(3) . . ? 
N6 C41 C42 99.0(2) . . ? 
N5 C41 C42 103.1(3) . . ? 
C52 C41 C42 122.9(3) . . ? 
O7 C42 C57 110.3(3) . . ? 
O7 C42 C43 113.7(3) . . ? 
C57 C42 C43 111.0(3) . . ? 
O7 C42 C41 116.2(3) . . ? 
C57 C42 C41 105.2(3) . . ? 
C43 C42 C41 99.9(3) . . ? 
C48 C43 C44 120.2(3) . . ? 
C48 C43 C42 111.5(3) . . ? 
C44 C43 C42 128.3(3) . . ? 
C43 C44 C45 117.9(3) . . ? 
C43 C44 H44 121.1 . . ? 
C45 C44 H44 121.1 . . ? 
C44 C45 C46 121.3(3) . . ? 
C44 C45 H45 119.3 . . ? 
C46 C45 H45 119.3 . . ? 
C47 C46 C45 120.4(3) . . ? 
C47 C46 H46 119.8 . . ? 
C45 C46 H46 119.8 . . ? 
C48 C47 C46 117.5(3) . . ? 
C48 C47 H47 121.3 . . ? 
C46 C47 H47 121.3 . . ? 
C47 C48 C43 122.7(3) . . ? 
C47 C48 N5 128.2(3) . . ? 
C43 C48 N5 109.1(3) . . ? 
O8 C49 N5 119.5(3) . . ? 
O8 C49 C50 121.7(3) . . ? 
N5 C49 C50 118.8(3) . . ? 
C49 C50 C51 113.0(3) . . ? 
C49 C50 H50A 109.0 . . ? 
C51 C50 H50A 109.0 . . ? 
C49 C50 H50B 109.0 . . ? 
C51 C50 H50B 109.0 . . ? 
H50A C50 H50B 107.8 . . ? 
C50 C51 C52 112.2(3) . . ? 
C50 C51 H51A 109.2 . . ? 
C52 C51 H51A 109.2 . . ? 
C50 C51 H51B 109.2 . . ? 
C52 C51 H51B 109.2 . . ? 
H51A C51 H51B 107.9 . . ? 
C51 C52 C58 110.1(3) . . ? 
C51 C52 C53 108.6(3) . . ? 
C58 C52 C53 111.1(3) . . ? 
C51 C52 C41 109.2(3) . . ? 
C58 C52 C41 109.1(3) . . ? 
C53 C52 C41 108.7(3) . . ? 
C54 C53 C52 114.7(3) . . ? 
C54 C53 H53A 108.6 . . ? 
C52 C53 H53A 108.6 . . ? 
C54 C53 H53B 108.6 . . ? 
C52 C53 H53B 108.6 . . ? 
H53A C53 H53B 107.6 . . ? 
C55 C54 C53 108.6(3) . . ? 
C55 C54 H54A 110.0 . . ? 
C53 C54 H54A 110.0 . . ? 
C55 C54 H54B 110.0 . . ? 
C53 C54 H54B 110.0 . . ? 
H54A C54 H54B 108.4 . . ? 
N6 C55 C54 108.5(3) . . ? 
N6 C55 H55A 110.0 . . ? 
C54 C55 H55A 110.0 . . ? 
N6 C55 H55B 110.0 . . ? 
C54 C55 H55B 110.0 . . ? 
H55A C55 H55B 108.4 . . ? 
O9 C56 N6 124.9(4) . . ? 
O9 C56 C57 125.4(4) . . ? 
N6 C56 C57 109.7(3) . . ? 
C56 C57 C42 103.3(3) . . ? 
C56 C57 H57A 111.1 . . ? 
C42 C57 H57A 111.1 . . ? 
C56 C57 H57B 111.1 . . ? 
C42 C57 H57B 111.1 . . ? 
H57A C57 H57B 109.1 . . ? 
C59 C58 C52 115.4(3) . . ? 
C59 C58 H58A 108.4 . . ? 
C52 C58 H58A 108.4 . . ? 
C59 C58 H58B 108.4 . . ? 
C52 C58 H58B 108.4 . . ? 
H58A C58 H58B 107.5 . . ? 
C58 C59 H59A 109.5 . . ? 
C58 C59 H59B 109.5 . . ? 
H59A C59 H59B 109.5 . . ? 
C58 C59 H59C 109.5 . . ? 
H59A C59 H59C 109.5 . . ? 
H59B C59 H59C 109.5 . . ? 
N8 C61 N7 109.0(3) . . ? 
N8 C61 C72 110.0(3) . . ? 
N7 C61 C72 112.4(3) . . ? 
N8 C61 C62 98.9(2) . . ? 
N7 C61 C62 102.6(2) . . ? 
C72 C61 C62 122.7(3) . . ? 
O10 C62 C77 112.2(3) . . ? 
O10 C62 C63 113.4(3) . . ? 
C77 C62 C63 110.2(3) . . ? 
O10 C62 C61 115.5(2) . . ? 
C77 C62 C61 104.7(3) . . ? 
C63 C62 C61 99.9(3) . . ? 
C68 C63 C64 120.2(3) . . ? 
C68 C63 C62 111.5(3) . . ? 
C64 C63 C62 128.3(3) . . ? 
C63 C64 C65 118.6(3) . . ? 
C63 C64 H64 120.7 . . ? 
C65 C64 H64 120.7 . . ? 
C64 C65 C66 120.6(3) . . ? 
C64 C65 H65 119.7 . . ? 
C66 C65 H65 119.7 . . ? 
C65 C66 C67 120.7(3) . . ? 
C65 C66 H66 119.7 . . ? 
C67 C66 H66 119.7 . . ? 
C68 C67 C66 117.7(3) . . ? 
C68 C67 H67 121.1 . . ? 
C66 C67 H67 121.1 . . ? 
C63 C68 C67 122.1(3) . . ? 
C63 C68 N7 109.2(3) . . ? 
C67 C68 N7 128.6(3) . . ? 
O11 C69 N7 119.8(3) . . ? 
O11 C69 C70 121.7(3) . . ? 
N7 C69 C70 118.5(3) . . ? 
C69 C70 C71 112.9(3) . . ? 
C69 C70 H70A 109.0 . . ? 
C71 C70 H70A 109.0 . . ? 
C69 C70 H70B 109.0 . . ? 
C71 C70 H70B 109.0 . . ? 
H70A C70 H70B 107.8 . . ? 
C70 C71 C72 112.3(3) . . ? 
C70 C71 H71A 109.1 . . ? 
C72 C71 H71A 109.1 . . ? 
C70 C71 H71B 109.1 . . ? 
C72 C71 H71B 109.1 . . ? 
H71A C71 H71B 107.9 . . ? 
C71 C72 C73 109.2(3) . . ? 
C71 C72 C78 109.5(3) . . ? 
C73 C72 C78 111.0(3) . . ? 
C71 C72 C61 109.2(3) . . ? 
C73 C72 C61 109.0(3) . . ? 
C78 C72 C61 108.8(3) . . ? 
C74 C73 C72 115.1(3) . . ? 
C74 C73 H73A 108.5 . . ? 
C72 C73 H73A 108.5 . . ? 
C74 C73 H73B 108.5 . . ? 
C72 C73 H73B 108.5 . . ? 
H73A C73 H73B 107.5 . . ? 
C75 C74 C73 108.0(3) . . ? 
C75 C74 H74A 110.1 . . ? 
C73 C74 H74A 110.1 . . ? 
C75 C74 H74B 110.1 . . ? 
C73 C74 H74B 110.1 . . ? 
H74A C74 H74B 108.4 . . ? 
N8 C75 C74 108.5(3) . . ? 
N8 C75 H75A 110.0 . . ? 
C74 C75 H75A 110.0 . . ? 
N8 C75 H75B 110.0 . . ? 
C74 C75 H75B 110.0 . . ? 
H75A C75 H75B 108.4 . . ? 
O12 C76 N8 124.4(4) . . ? 
O12 C76 C77 126.1(3) . . ? 
N8 C76 C77 109.4(3) . . ? 
C76 C77 C62 102.9(3) . . ? 
C76 C77 H77A 111.2 . . ? 
C62 C77 H77A 111.2 . . ? 
C76 C77 H77B 111.2 . . ? 
C62 C77 H77B 111.2 . . ? 
H77A C77 H77B 109.1 . . ? 
C79 C78 C72 115.3(3) . . ? 
C79 C78 H78A 108.4 . . ? 
C72 C78 H78A 108.4 . . ? 
C79 C78 H78B 108.4 . . ? 
C72 C78 H78B 108.4 . . ? 
H78A C78 H78B 107.5 . . ? 
C78 C79 H79A 109.5 . . ? 
C78 C79 H79B 109.5 . . ? 
H79A C79 H79B 109.5 . . ? 
C78 C79 H79C 109.5 . . ? 
H79A C79 H79C 109.5 . . ? 
H79B C79 H79C 109.5 . . ? 
Cl3 C80 Cl2 111.5(2) . . ? 
Cl3 C80 Cl1 109.9(2) . . ? 
Cl2 C80 Cl1 110.2(2) . . ? 
Cl3 C80 H80 108.4 . . ? 
Cl2 C80 H80 108.4 . . ? 
Cl1 C80 H80 108.4 . . ? 
Cl5 C81 Cl4 112.0(3) . . ? 
Cl5 C81 Cl6 111.2(2) . . ? 
Cl4 C81 Cl6 110.6(3) . . ? 
Cl5 C81 H81 107.6 . . ? 
Cl4 C81 H81 107.6 . . ? 
Cl6 C81 H81 107.6 . . ? 
Cl7 C82 Cl8 110.5(3) . . ? 
Cl7 C82 Cl9 110.2(3) . . ? 
Cl8 C82 Cl9 110.9(2) . . ? 
Cl7 C82 H82 108.4 . . ? 
Cl8 C82 H82 108.4 . . ? 
Cl9 C82 H82 108.4 . . ? 
Cl12 C83 Cl10 110.6(3) . . ? 
Cl12 C83 Cl11 110.7(3) . . ? 
Cl10 C83 Cl11 111.0(3) . . ? 
Cl12 C83 H83 108.1 . . ? 
Cl10 C83 H83 108.1 . . ? 
Cl11 C83 H83 108.1 . . ? 
Cl15 C84 Cl14 110.5(2) . . ? 
Cl15 C84 Cl13 110.0(2) . . ? 
Cl14 C84 Cl13 110.9(2) . . ? 
Cl15 C84 H84 108.5 . . ? 
Cl14 C84 H84 108.5 . . ? 
Cl13 C84 H84 108.5 . . ? 
Cl16 C85 Cl18 110.7(2) . . ? 
Cl16 C85 Cl17 110.7(2) . . ? 
Cl18 C85 Cl17 110.9(2) . . ? 
Cl16 C85 H85 108.2 . . ? 
Cl18 C85 H85 108.2 . . ? 
Cl17 C85 H85 108.2 . . ? 
Cl19 C86 Cl21 111.2(3) . . ? 
Cl19 C86 Cl20 110.5(2) . . ? 
Cl21 C86 Cl20 110.6(3) . . ? 
Cl19 C86 H86 108.1 . . ? 
Cl21 C86 H86 108.1 . . ? 
Cl20 C86 H86 108.1 . . ? 
Cl24 C87 Cl22 111.6(3) . . ? 
Cl24 C87 Cl23 109.7(3) . . ? 
Cl22 C87 Cl23 109.9(2) . . ? 
Cl24 C87 H87 108.5 . . ? 
Cl22 C87 H87 108.5 . . ? 
Cl23 C87 H87 108.5 . . ? 
  
loop_ 
 _geom_torsion_atom_site_label_1 
 _geom_torsion_atom_site_label_2 
 _geom_torsion_atom_site_label_3 
 _geom_torsion_atom_site_label_4 
 _geom_torsion 
 _geom_torsion_site_symmetry_1 
 _geom_torsion_site_symmetry_2 
 _geom_torsion_site_symmetry_3 
 _geom_torsion_site_symmetry_4 
 _geom_torsion_publ_flag 
C16 N2 C1 N1 -131.1(3) . . . . ? 
C15 N2 C1 N1 69.3(4) . . . . ? 
C16 N2 C1 C12 106.1(3) . . . . ? 
C15 N2 C1 C12 -53.6(4) . . . . ? 
C16 N2 C1 C2 -23.7(3) . . . . ? 
C15 N2 C1 C2 176.7(3) . . . . ? 
C9 N1 C1 N2 -146.6(3) . . . . ? 
C8 N1 C1 N2 73.1(3) . . . . ? 
C9 N1 C1 C12 -25.5(4) . . . . ? 
C8 N1 C1 C12 -165.8(3) . . . . ? 
C9 N1 C1 C2 108.5(3) . . . . ? 
C8 N1 C1 C2 -31.8(3) . . . . ? 
N2 C1 C2 O1 152.5(3) . . . . ? 
N1 C1 C2 O1 -95.4(3) . . . . ? 
C12 C1 C2 O1 32.1(4) . . . . ? 
N2 C1 C2 C3 -84.1(3) . . . . ? 
N1 C1 C2 C3 28.0(3) . . . . ? 
C12 C1 C2 C3 155.6(3) . . . . ? 
N2 C1 C2 C17 29.7(3) . . . . ? 
N1 C1 C2 C17 141.7(3) . . . . ? 
C12 C1 C2 C17 -90.7(3) . . . . ? 
O1 C2 C3 C4 -72.9(4) . . . . ? 
C17 C2 C3 C4 53.4(5) . . . . ? 
C1 C2 C3 C4 162.7(3) . . . . ? 
O1 C2 C3 C8 108.6(3) . . . . ? 
C17 C2 C3 C8 -125.1(3) . . . . ? 
C1 C2 C3 C8 -15.8(3) . . . . ? 
C8 C3 C4 C5 -0.1(5) . . . . ? 
C2 C3 C4 C5 -178.5(3) . . . . ? 
C3 C4 C5 C6 1.5(5) . . . . ? 
C4 C5 C6 C7 -1.1(5) . . . . ? 
C5 C6 C7 C8 -0.9(5) . . . . ? 
C6 C7 C8 C3 2.3(5) . . . . ? 
C6 C7 C8 N1 -177.4(3) . . . . ? 
C4 C3 C8 C7 -1.9(5) . . . . ? 
C2 C3 C8 C7 176.8(3) . . . . ? 
C4 C3 C8 N1 177.9(3) . . . . ? 
C2 C3 C8 N1 -3.4(4) . . . . ? 
C9 N1 C8 C7 58.4(5) . . . . ? 
C1 N1 C8 C7 -157.3(3) . . . . ? 
C9 N1 C8 C3 -121.4(3) . . . . ? 
C1 N1 C8 C3 22.9(3) . . . . ? 
C8 N1 C9 O2 -26.1(5) . . . . ? 
C1 N1 C9 O2 -163.0(3) . . . . ? 
C8 N1 C9 C10 153.6(3) . . . . ? 
C1 N1 C9 C10 16.7(5) . . . . ? 
O2 C9 C10 C11 151.5(3) . . . . ? 
N1 C9 C10 C11 -28.3(5) . . . . ? 
C9 C10 C11 C12 50.7(4) . . . . ? 
C10 C11 C12 C13 59.3(4) . . . . ? 
C10 C11 C12 C18 -177.8(3) . . . . ? 
C10 C11 C12 C1 -59.0(4) . . . . ? 
N2 C1 C12 C11 165.6(3) . . . . ? 
N1 C1 C12 C11 44.7(4) . . . . ? 
C2 C1 C12 C11 -78.8(4) . . . . ? 
N2 C1 C12 C13 46.9(4) . . . . ? 
N1 C1 C12 C13 -74.0(3) . . . . ? 
C2 C1 C12 C13 162.5(3) . . . . ? 
N2 C1 C12 C18 -74.8(3) . . . . ? 
N1 C1 C12 C18 164.3(3) . . . . ? 
C2 C1 C12 C18 40.8(4) . . . . ? 
C11 C12 C13 C14 -172.7(3) . . . . ? 
C18 C12 C13 C14 65.6(4) . . . . ? 
C1 C12 C13 C14 -54.1(4) . . . . ? 
C12 C13 C14 C15 58.1(4) . . . . ? 
C16 N2 C15 C14 -100.7(4) . . . . ? 
C1 N2 C15 C14 57.2(4) . . . . ? 
C13 C14 C15 N2 -54.2(4) . . . . ? 
C15 N2 C16 O3 -12.3(5) . . . . ? 
C1 N2 C16 O3 -171.6(3) . . . . ? 
C15 N2 C16 C17 167.3(3) . . . . ? 
C1 N2 C16 C17 7.9(4) . . . . ? 
O3 C16 C17 C2 -167.8(3) . . . . ? 
N2 C16 C17 C2 12.7(4) . . . . ? 
O1 C2 C17 C16 -151.9(3) . . . . ? 
C3 C2 C17 C16 80.1(3) . . . . ? 
C1 C2 C17 C16 -26.2(3) . . . . ? 
C11 C12 C18 C19 -63.3(4) . . . . ? 
C13 C12 C18 C19 58.0(4) . . . . ? 
C1 C12 C18 C19 177.7(3) . . . . ? 
C36 N4 C21 N3 -128.1(3) . . . . ? 
C35 N4 C21 N3 71.6(4) . . . . ? 
C36 N4 C21 C32 107.8(3) . . . . ? 
C35 N4 C21 C32 -52.5(4) . . . . ? 
C36 N4 C21 C22 -21.0(3) . . . . ? 
C35 N4 C21 C22 178.7(3) . . . . ? 
C29 N3 C21 N4 -144.8(3) . . . . ? 
C28 N3 C21 N4 73.8(3) . . . . ? 
C29 N3 C21 C32 -22.5(4) . . . . ? 
C28 N3 C21 C32 -163.9(3) . . . . ? 
C29 N3 C21 C22 111.0(3) . . . . ? 
C28 N3 C21 C22 -30.4(3) . . . . ? 
N4 C21 C22 O4 152.6(3) . . . . ? 
N3 C21 C22 O4 -95.1(3) . . . . ? 
C32 C21 C22 O4 32.8(4) . . . . ? 
N4 C21 C22 C37 28.7(3) . . . . ? 
N3 C21 C22 C37 141.0(3) . . . . ? 
C32 C21 C22 C37 -91.1(3) . . . . ? 
N4 C21 C22 C23 -85.3(3) . . . . ? 
N3 C21 C22 C23 27.0(3) . . . . ? 
C32 C21 C22 C23 154.8(3) . . . . ? 
O4 C22 C23 C28 108.6(3) . . . . ? 
C37 C22 C23 C28 -126.0(3) . . . . ? 
C21 C22 C23 C28 -15.6(3) . . . . ? 
O4 C22 C23 C24 -70.5(4) . . . . ? 
C37 C22 C23 C24 54.9(5) . . . . ? 
C21 C22 C23 C24 165.3(3) . . . . ? 
C28 C23 C24 C25 -0.5(5) . . . . ? 
C22 C23 C24 C25 178.6(3) . . . . ? 
C23 C24 C25 C26 2.7(5) . . . . ? 
C24 C25 C26 C27 -2.8(5) . . . . ? 
C25 C26 C27 C28 0.5(5) . . . . ? 
C24 C23 C28 C27 -1.8(5) . . . . ? 
C22 C23 C28 C27 179.0(3) . . . . ? 
C24 C23 C28 N3 176.4(3) . . . . ? 
C22 C23 C28 N3 -2.8(4) . . . . ? 
C26 C27 C28 C23 1.8(5) . . . . ? 
C26 C27 C28 N3 -176.1(3) . . . . ? 
C29 N3 C28 C23 -123.9(3) . . . . ? 
C21 N3 C28 C23 21.7(3) . . . . ? 
C29 N3 C28 C27 54.2(5) . . . . ? 
C21 N3 C28 C27 -160.2(3) . . . . ? 
C28 N3 C29 O5 -26.0(5) . . . . ? 
C21 N3 C29 O5 -164.3(3) . . . . ? 
C28 N3 C29 C30 153.8(3) . . . . ? 
C21 N3 C29 C30 15.6(5) . . . . ? 
O5 C29 C30 C31 150.4(3) . . . . ? 
N3 C29 C30 C31 -29.5(5) . . . . ? 
C29 C30 C31 C32 52.3(4) . . . . ? 
C30 C31 C32 C38 -178.8(3) . . . . ? 
C30 C31 C32 C33 59.1(4) . . . . ? 
C30 C31 C32 C21 -58.8(4) . . . . ? 
N4 C21 C32 C31 164.4(3) . . . . ? 
N3 C21 C32 C31 42.3(4) . . . . ? 
C22 C21 C32 C31 -81.2(4) . . . . ? 
N4 C21 C32 C38 -75.5(4) . . . . ? 
N3 C21 C32 C38 162.4(3) . . . . ? 
C22 C21 C32 C38 38.9(4) . . . . ? 
N4 C21 C32 C33 46.3(4) . . . . ? 
N3 C21 C32 C33 -75.8(3) . . . . ? 
C22 C21 C32 C33 160.7(3) . . . . ? 
C31 C32 C33 C34 -173.2(3) . . . . ? 
C38 C32 C33 C34 65.9(4) . . . . ? 
C21 C32 C33 C34 -54.8(4) . . . . ? 
C32 C33 C34 C35 59.7(4) . . . . ? 
C36 N4 C35 C34 -101.8(4) . . . . ? 
C21 N4 C35 C34 57.3(4) . . . . ? 
C33 C34 C35 N4 -55.4(4) . . . . ? 
C35 N4 C36 O6 -14.2(5) . . . . ? 
C21 N4 C36 O6 -174.4(3) . . . . ? 
C35 N4 C36 C37 165.0(3) . . . . ? 
C21 N4 C36 C37 4.8(4) . . . . ? 
O6 C36 C37 C22 -165.9(3) . . . . ? 
N4 C36 C37 C22 14.9(4) . . . . ? 
O4 C22 C37 C36 -153.9(3) . . . . ? 
C23 C22 C37 C36 79.8(3) . . . . ? 
C21 C22 C37 C36 -27.0(3) . . . . ? 
C31 C32 C38 C39 -63.2(4) . . . . ? 
C33 C32 C38 C39 57.1(4) . . . . ? 
C21 C32 C38 C39 177.0(3) . . . . ? 
C56 N6 C41 N5 -133.7(3) . . . . ? 
C55 N6 C41 N5 69.4(4) . . . . ? 
C56 N6 C41 C52 103.1(3) . . . . ? 
C55 N6 C41 C52 -53.8(4) . . . . ? 
C56 N6 C41 C42 -26.4(3) . . . . ? 
C55 N6 C41 C42 176.7(3) . . . . ? 
C49 N5 C41 N6 -145.4(3) . . . . ? 
C48 N5 C41 N6 73.4(3) . . . . ? 
C49 N5 C41 C52 -24.3(4) . . . . ? 
C48 N5 C41 C52 -165.6(3) . . . . ? 
C49 N5 C41 C42 110.1(3) . . . . ? 
C48 N5 C41 C42 -31.2(3) . . . . ? 
N6 C41 C42 O7 152.2(3) . . . . ? 
N5 C41 C42 O7 -95.7(3) . . . . ? 
C52 C41 C42 O7 32.5(4) . . . . ? 
N6 C41 C42 C57 29.9(3) . . . . ? 
N5 C41 C42 C57 142.1(3) . . . . ? 
C52 C41 C42 C57 -89.7(3) . . . . ? 
N6 C41 C42 C43 -85.1(3) . . . . ? 
N5 C41 C42 C43 27.0(3) . . . . ? 
C52 C41 C42 C43 155.2(3) . . . . ? 
O7 C42 C43 C48 109.6(3) . . . . ? 
C57 C42 C43 C48 -125.4(3) . . . . ? 
C41 C42 C43 C48 -14.8(3) . . . . ? 
O7 C42 C43 C44 -70.8(4) . . . . ? 
C57 C42 C43 C44 54.2(5) . . . . ? 
C41 C42 C43 C44 164.7(3) . . . . ? 
C48 C43 C44 C45 0.0(5) . . . . ? 
C42 C43 C44 C45 -179.5(3) . . . . ? 
C43 C44 C45 C46 2.3(5) . . . . ? 
C44 C45 C46 C47 -2.7(5) . . . . ? 
C45 C46 C47 C48 0.7(5) . . . . ? 
C46 C47 C48 C43 1.7(5) . . . . ? 
C46 C47 C48 N5 -176.5(3) . . . . ? 
C44 C43 C48 C47 -2.1(5) . . . . ? 
C42 C43 C48 C47 177.5(3) . . . . ? 
C44 C43 C48 N5 176.4(3) . . . . ? 
C42 C43 C48 N5 -4.0(4) . . . . ? 
C49 N5 C48 C47 56.2(5) . . . . ? 
C41 N5 C48 C47 -158.7(3) . . . . ? 
C49 N5 C48 C43 -122.2(3) . . . . ? 
C41 N5 C48 C43 22.9(3) . . . . ? 
C48 N5 C49 O8 -24.8(5) . . . . ? 
C41 N5 C49 O8 -162.8(3) . . . . ? 
C48 N5 C49 C50 153.2(3) . . . . ? 
C41 N5 C49 C50 15.3(5) . . . . ? 
O8 C49 C50 C51 150.9(3) . . . . ? 
N5 C49 C50 C51 -27.1(5) . . . . ? 
C49 C50 C51 C52 50.2(4) . . . . ? 
C50 C51 C52 C58 -178.8(3) . . . . ? 
C50 C51 C52 C53 59.4(4) . . . . ? 
C50 C51 C52 C41 -59.0(4) . . . . ? 
N6 C41 C52 C51 165.5(3) . . . . ? 
N5 C41 C52 C51 44.4(4) . . . . ? 
C42 C41 C52 C51 -79.7(4) . . . . ? 
N6 C41 C52 C58 -74.1(3) . . . . ? 
N5 C41 C52 C58 164.8(3) . . . . ? 
C42 C41 C52 C58 40.8(4) . . . . ? 
N6 C41 C52 C53 47.1(4) . . . . ? 
N5 C41 C52 C53 -74.0(3) . . . . ? 
C42 C41 C52 C53 162.0(3) . . . . ? 
C51 C52 C53 C54 -173.0(3) . . . . ? 
C58 C52 C53 C54 65.8(4) . . . . ? 
C41 C52 C53 C54 -54.2(4) . . . . ? 
C52 C53 C54 C55 57.8(4) . . . . ? 
C56 N6 C55 C54 -97.9(4) . . . . ? 
C41 N6 C55 C54 57.2(4) . . . . ? 
C53 C54 C55 N6 -53.9(4) . . . . ? 
C55 N6 C56 O9 -9.5(5) . . . . ? 
C41 N6 C56 O9 -166.3(3) . . . . ? 
C55 N6 C56 C57 169.3(3) . . . . ? 
C41 N6 C56 C57 12.4(4) . . . . ? 
O9 C56 C57 C42 -172.6(3) . . . . ? 
N6 C56 C57 C42 8.6(4) . . . . ? 
O7 C42 C57 C56 -150.1(3) . . . . ? 
C43 C42 C57 C56 83.0(3) . . . . ? 
C41 C42 C57 C56 -24.2(3) . . . . ? 
C51 C52 C58 C59 -65.4(4) . . . . ? 
C53 C52 C58 C59 55.0(4) . . . . ? 
C41 C52 C58 C59 174.7(3) . . . . ? 
C76 N8 C61 N7 -128.5(3) . . . . ? 
C75 N8 C61 N7 71.1(4) . . . . ? 
C76 N8 C61 C72 107.9(3) . . . . ? 
C75 N8 C61 C72 -52.5(4) . . . . ? 
C76 N8 C61 C62 -21.8(3) . . . . ? 
C75 N8 C61 C62 177.8(3) . . . . ? 
C69 N7 C61 N8 -146.4(3) . . . . ? 
C68 N7 C61 N8 72.4(3) . . . . ? 
C69 N7 C61 C72 -24.3(4) . . . . ? 
C68 N7 C61 C72 -165.4(3) . . . . ? 
C69 N7 C61 C62 109.4(3) . . . . ? 
C68 N7 C61 C62 -31.8(3) . . . . ? 
N8 C61 C62 O10 154.0(3) . . . . ? 
N7 C61 C62 O10 -94.1(3) . . . . ? 
C72 C61 C62 O10 33.2(4) . . . . ? 
N8 C61 C62 C77 30.1(3) . . . . ? 
N7 C61 C62 C77 142.0(3) . . . . ? 
C72 C61 C62 C77 -90.7(3) . . . . ? 
N8 C61 C62 C63 -84.0(3) . . . . ? 
N7 C61 C62 C63 27.9(3) . . . . ? 
C72 C61 C62 C63 155.2(3) . . . . ? 
O10 C62 C63 C68 107.7(3) . . . . ? 
C77 C62 C63 C68 -125.6(3) . . . . ? 
C61 C62 C63 C68 -15.9(3) . . . . ? 
O10 C62 C63 C64 -73.8(4) . . . . ? 
C77 C62 C63 C64 52.9(5) . . . . ? 
C61 C62 C63 C64 162.7(3) . . . . ? 
C68 C63 C64 C65 -1.5(5) . . . . ? 
C62 C63 C64 C65 -179.9(3) . . . . ? 
C63 C64 C65 C66 2.7(5) . . . . ? 
C64 C65 C66 C67 -1.8(5) . . . . ? 
C65 C66 C67 C68 -0.4(5) . . . . ? 
C64 C63 C68 C67 -0.7(5) . . . . ? 
C62 C63 C68 C67 178.0(3) . . . . ? 
C64 C63 C68 N7 177.9(3) . . . . ? 
C62 C63 C68 N7 -3.4(4) . . . . ? 
C66 C67 C68 C63 1.7(5) . . . . ? 
C66 C67 C68 N7 -176.7(3) . . . . ? 
C69 N7 C68 C63 -122.1(3) . . . . ? 
C61 N7 C68 C63 23.0(3) . . . . ? 
C69 N7 C68 C67 56.5(5) . . . . ? 
C61 N7 C68 C67 -158.5(3) . . . . ? 
C68 N7 C69 O11 -25.3(5) . . . . ? 
C61 N7 C69 O11 -163.2(3) . . . . ? 
C68 N7 C69 C70 154.8(3) . . . . ? 
C61 N7 C69 C70 16.9(5) . . . . ? 
O11 C69 C70 C71 150.6(3) . . . . ? 
N7 C69 C70 C71 -29.5(4) . . . . ? 
C69 C70 C71 C72 51.8(4) . . . . ? 
C70 C71 C72 C73 60.3(4) . . . . ? 
C70 C71 C72 C78 -177.9(3) . . . . ? 
C70 C71 C72 C61 -58.8(4) . . . . ? 
N8 C61 C72 C71 164.9(3) . . . . ? 
N7 C61 C72 C71 43.2(4) . . . . ? 
C62 C61 C72 C71 -79.7(4) . . . . ? 
N8 C61 C72 C73 45.6(4) . . . . ? 
N7 C61 C72 C73 -76.0(3) . . . . ? 
C62 C61 C72 C73 161.0(3) . . . . ? 
N8 C61 C72 C78 -75.6(3) . . . . ? 
N7 C61 C72 C78 162.8(3) . . . . ? 
C62 C61 C72 C78 39.8(4) . . . . ? 
C71 C72 C73 C74 -172.4(3) . . . . ? 
C78 C72 C73 C74 66.7(4) . . . . ? 
C61 C72 C73 C74 -53.2(4) . . . . ? 
C72 C73 C74 C75 58.2(4) . . . . ? 
C76 N8 C75 C74 -101.4(4) . . . . ? 
C61 N8 C75 C74 57.5(4) . . . . ? 
C73 C74 C75 N8 -55.0(4) . . . . ? 
C75 N8 C76 O12 -14.2(5) . . . . ? 
C61 N8 C76 O12 -174.2(3) . . . . ? 
C75 N8 C76 C77 164.8(3) . . . . ? 
C61 N8 C76 C77 4.8(4) . . . . ? 
O12 C76 C77 C62 -165.2(3) . . . . ? 
N8 C76 C77 C62 15.9(4) . . . . ? 
O10 C62 C77 C76 -154.4(3) . . . . ? 
C63 C62 C77 C76 78.2(3) . . . . ? 
C61 C62 C77 C76 -28.4(3) . . . . ? 
C71 C72 C78 C79 -61.3(4) . . . . ? 
C73 C72 C78 C79 59.5(4) . . . . ? 
C61 C72 C78 C79 179.5(3) . . . . ? 
  
loop_ 
 _geom_hbond_atom_site_label_D 
 _geom_hbond_atom_site_label_H 
 _geom_hbond_atom_site_label_A 
 _geom_hbond_distance_DH 
 _geom_hbond_distance_HA 
 _geom_hbond_distance_DA 
 _geom_hbond_angle_DHA 
 _geom_hbond_site_symmetry_A 
O1 H1 O8  0.84 1.89 2.702(4) 161 2 
O4 H4A O11  0.84 1.87 2.699(4) 168 2 
O7 H7A O2  0.84 1.89 2.687(4) 159 2 
O10 H10 O5  0.84 1.91 2.722(4) 164 2 
  
_diffrn_measured_fraction_theta_max    0.953 
_diffrn_reflns_theta_full              25.00 
_diffrn_measured_fraction_theta_full   0.984 
_refine_diff_density_max    1.815 
_refine_diff_density_min   -1.439 
_refine_diff_density_rms    0.121 

_iucr_refine_instructions_details
;
TITL XZRVI-199b in P-1
CELL 0.71073  16.5205  16.7378  18.7531  95.9557  91.2732 103.1019
ZERR    8.00   0.0019   0.0033   0.0025   0.0120   0.0100   0.0110
LATT  1
SFAC C H N O CL
UNIT 168 192 16 24 48
REM   ----------------------------------------------------------
REM   Data collection: Bruker APEX II CCD
REM   Absorption correction: SADABS
REM   Crystal habit: prism; Crystal colour: colourless
REM   Mole 1 contains 4 independent molecules
REM   Mole 2 contains 8 solvent molecules: CH2Cl2
REM   ----------------------------------------------------------
L.S.  10
ACTA  50
OMIT  6   1   0
FMAP  2
PLAN  10
CONF
BOND  $H
SIZE  0.446 0.356 0.194
WPDB -2
HTAB
EQIV  $1 -X, -Y, -Z
HTAB  O1 O8_$1
HTAB  O4 O11_$1
HTAB  O7 O2_$1
HTAB  O10 O5_$1
TEMP -173
WGHT    0.102000   19.151299
FVAR       0.41064
MOLE  1
O1    4    0.139344   -0.058222    0.088665    11.00000    0.01528    0.02413 =
         0.01415    0.00024    0.00320    0.00784
AFIX  83
H1    2    0.162367   -0.019212    0.119550    11.00000   -1.50000
AFIX   0
O2    4    0.296422   -0.071506    0.293278    11.00000    0.02185    0.03048 =
         0.01760   -0.00472    0.00224    0.00710
O3    4    0.206125   -0.294633   -0.036770    11.00000    0.02773    0.02726 =
         0.02412   -0.00989    0.01155    0.00230
O4    4   -0.827881   -0.067519   -0.409921    11.00000    0.01922    0.02688 =
         0.01467   -0.00215    0.00063    0.01008
AFIX  83
H4A   2   -0.810898   -0.028768   -0.377081    11.00000   -1.50000
AFIX   0
O5    4   -0.679201   -0.054393   -0.191631    11.00000    0.02388    0.03329 =
         0.01606   -0.00577    0.00123    0.00828
O6    4   -0.742124   -0.308679   -0.505653    11.00000    0.03407    0.02341 =
         0.02442   -0.00733    0.01371    0.00375
O7    4   -0.328664   -0.044184   -0.407201    11.00000    0.02165    0.02191 =
         0.01621   -0.00119   -0.00005    0.01006
AFIX  83
H7A   2   -0.306129   -0.005999   -0.375415    11.00000   -1.50000
AFIX   0
O8    4   -0.178241   -0.063211   -0.198981    11.00000    0.02164    0.03118 =
         0.01789   -0.00285    0.00198    0.00750
O9    4   -0.275937   -0.287230   -0.530496    11.00000    0.03134    0.02671 =
         0.02598   -0.00897    0.01235    0.00013
O10   4    0.637844   -0.078668    0.090352    11.00000    0.01576    0.02253 =
         0.01685    0.00065    0.00249    0.00703
AFIX  83
H10   2    0.659762   -0.035862    0.117714    11.00000   -1.50000
AFIX   0
O11   4    0.796600   -0.055233    0.300685    11.00000    0.01894    0.02706 =
         0.01732   -0.00298    0.00190    0.00692
O12   4    0.724261   -0.318777   -0.007827    11.00000    0.03340    0.02516 =
         0.02660   -0.00648    0.01363    0.00501
N1    3    0.249969   -0.146813    0.186894    11.00000    0.01195    0.01946 =
         0.01332    0.00035    0.00384    0.00353
N2    3    0.207637   -0.248362    0.083502    11.00000    0.01622    0.01828 =
         0.01977   -0.00343    0.00852    0.00447
N3    3   -0.719342   -0.139079   -0.294857    11.00000    0.01745    0.01930 =
         0.01252   -0.00002    0.00378    0.00513
N4    3   -0.754715   -0.251951   -0.390843    11.00000    0.01693    0.01963 =
         0.01737   -0.00197    0.00602    0.00471
N5    3   -0.223339   -0.136412   -0.306555    11.00000    0.01367    0.02044 =
         0.01326    0.00015    0.00263    0.00456
N6    3   -0.265672   -0.237442   -0.410680    11.00000    0.01843    0.02213 =
         0.01749   -0.00142    0.00748    0.00627
N7    3    0.753677   -0.145252    0.201119    11.00000    0.01394    0.01900 =
         0.01180   -0.00021    0.00428    0.00460
N8    3    0.716684   -0.260376    0.107495    11.00000    0.01878    0.01634 =
         0.01926   -0.00221    0.00793    0.00551
C1    1    0.182046   -0.183228    0.130505    11.00000    0.01413    0.01659 =
         0.01502    0.00063    0.00440    0.00543
C2    1    0.191231   -0.113879    0.077002    11.00000    0.01390    0.02404 =
         0.01411    0.00052    0.00455    0.00632
C3    1    0.283888   -0.074738    0.089010    11.00000    0.01309    0.02010 =
         0.01673   -0.00185    0.00575    0.00410
C4    1    0.336013   -0.024082    0.046521    11.00000    0.01961    0.02253 =
         0.01738    0.00277    0.00821    0.00511
AFIX  43
H4    2    0.314475   -0.008554    0.003995    11.00000   -1.20000
AFIX   0
C5    1    0.419955    0.003581    0.066943    11.00000    0.01735    0.02139 =
         0.02533   -0.00020    0.01063    0.00266
AFIX  43
H5    2    0.455612    0.039293    0.038799    11.00000   -1.20000
AFIX   0
C6    1    0.452480   -0.020804    0.128797    11.00000    0.01508    0.02356 =
         0.02625   -0.00188    0.00681    0.00449
AFIX  43
H6    2    0.510139   -0.002199    0.141698    11.00000   -1.20000
AFIX   0
C7    1    0.400538   -0.072455    0.171770    11.00000    0.01714    0.02380 =
         0.01833   -0.00042    0.00344    0.00710
AFIX  43
H7    2    0.422058   -0.089916    0.213370    11.00000   -1.20000
AFIX   0
C8    1    0.316586   -0.097039    0.151189    11.00000    0.01434    0.01854 =
         0.01772   -0.00053    0.00588    0.00484
C9    1    0.237563   -0.117259    0.256479    11.00000    0.01872    0.01865 =
         0.01491    0.00075    0.00336    0.00743
C10   1    0.152302   -0.141492    0.285367    11.00000    0.02262    0.02409 =
         0.01668    0.00123    0.00820    0.00501
AFIX  23
H10A  2    0.144107   -0.096374    0.320969    11.00000   -1.20000
H10B  2    0.148935   -0.191204    0.310546    11.00000   -1.20000
AFIX   0
C11   1    0.082292   -0.159505    0.227156    11.00000    0.01589    0.02374 =
         0.01810   -0.00012    0.00646    0.00527
AFIX  23
H11A  2    0.077868   -0.107206    0.208826    11.00000   -1.20000
H11B  2    0.028903   -0.182817    0.248361    11.00000   -1.20000
AFIX   0
C12   1    0.097318   -0.220762    0.164008    11.00000    0.01524    0.02193 =
         0.01660    0.00100    0.00632    0.00237
C13   1    0.103623   -0.302985    0.192759    11.00000    0.01889    0.02093 =
         0.02499    0.00155    0.00885    0.00407
AFIX  23
H13A  2    0.144445   -0.290202    0.234155    11.00000   -1.20000
H13B  2    0.048924   -0.328729    0.210539    11.00000   -1.20000
AFIX   0
C14   1    0.129310   -0.365688    0.137959    11.00000    0.02112    0.01952 =
         0.03537    0.00164    0.01121    0.00368
AFIX  23
H14A  2    0.087189   -0.382447    0.097588    11.00000   -1.20000
H14B  2    0.133434   -0.415511    0.160695    11.00000   -1.20000
AFIX   0
C15   1    0.213928   -0.325576    0.110234    11.00000    0.01979    0.01887 =
         0.03332   -0.00095    0.01067    0.00718
AFIX  23
H15A  2    0.257367   -0.314680    0.149512    11.00000   -1.20000
H15B  2    0.229419   -0.363054    0.071223    11.00000   -1.20000
AFIX   0
C16   1    0.197601   -0.242116    0.012304    11.00000    0.01552    0.02117 =
         0.02318   -0.00477    0.00797    0.00001
C17   1    0.173951   -0.162293    0.002334    11.00000    0.01862    0.02580 =
         0.01594   -0.00183    0.00423    0.00392
AFIX  23
H17A  2    0.114502   -0.171944   -0.013089    11.00000   -1.20000
H17B  2    0.208367   -0.132751   -0.033583    11.00000   -1.20000
AFIX   0
C18   1    0.026132   -0.234275    0.105069    11.00000    0.01449    0.02591 =
         0.02549    0.00056    0.00589    0.00433
AFIX  23
H18A  2    0.024559   -0.180208    0.088815    11.00000   -1.20000
H18B  2    0.039491   -0.269592    0.063386    11.00000   -1.20000
AFIX   0
C19   1   -0.060641   -0.274066    0.128826    11.00000    0.01703    0.02769 =
         0.03103   -0.00043    0.00483    0.00260
AFIX  33
H19A  2   -0.061386   -0.329786    0.140937    11.00000   -1.50000
H19B  2   -0.101943   -0.277211    0.089691    11.00000   -1.50000
H19C  2   -0.074017   -0.240618    0.171023    11.00000   -1.50000
AFIX   0
C21   1   -0.784167   -0.183815   -0.351311    11.00000    0.01656    0.01583 =
         0.01441   -0.00157    0.00331    0.00556
C22   1   -0.774111   -0.122308   -0.412287    11.00000    0.01785    0.02331 =
         0.01089    0.00116    0.00343    0.00804
C23   1   -0.682589   -0.078422   -0.398121    11.00000    0.01917    0.02027 =
         0.01546   -0.00081    0.00568    0.00657
C24   1   -0.630518   -0.029508   -0.442169    11.00000    0.02348    0.02305 =
         0.01519    0.00243    0.00678    0.00662
AFIX  43
H24   2   -0.650197   -0.020688   -0.488020    11.00000   -1.20000
AFIX   0
C25   1   -0.548044    0.006474   -0.416969    11.00000    0.02175    0.02183 =
         0.02222    0.00098    0.01088    0.00317
AFIX  43
H25   2   -0.512215    0.041943   -0.445181    11.00000   -1.20000
AFIX   0
C26   1   -0.518624   -0.009503   -0.351106    11.00000    0.01373    0.02333 =
         0.02635   -0.00420    0.00556    0.00512
AFIX  43
H26   2   -0.462124    0.013292   -0.335873    11.00000   -1.20000
AFIX   0
C27   1   -0.570915   -0.058663   -0.306821    11.00000    0.01754    0.02054 =
         0.01874   -0.00043    0.00292    0.00808
AFIX  43
H27   2   -0.551166   -0.069334   -0.261618    11.00000   -1.20000
AFIX   0
C28   1   -0.652789   -0.091140   -0.331731    11.00000    0.01535    0.01807 =
         0.01622   -0.00142    0.00582    0.00590
C29   1   -0.734887   -0.104411   -0.227820    11.00000    0.02147    0.02294 =
         0.01304    0.00197    0.00248    0.00811
C30   1   -0.821534   -0.129556   -0.200925    11.00000    0.02162    0.02560 =
         0.01725    0.00061    0.00796    0.00703
AFIX  23
H30A  2   -0.832683   -0.083259   -0.168298    11.00000   -1.20000
H30B  2   -0.824459   -0.177051   -0.172936    11.00000   -1.20000
AFIX   0
C31   1   -0.888978   -0.153327   -0.261789    11.00000    0.02027    0.02393 =
         0.01775   -0.00117    0.00747    0.00716
AFIX  23
H31A  2   -0.892990   -0.103397   -0.284405    11.00000   -1.20000
H31B  2   -0.943352   -0.175350   -0.241599    11.00000   -1.20000
AFIX   0
C32   1   -0.870296   -0.218654   -0.319481    11.00000    0.01590    0.02191 =
         0.01638   -0.00080    0.00580    0.00317
C33   1   -0.864527   -0.296881   -0.283145    11.00000    0.02669    0.02232 =
         0.02371    0.00131    0.01195    0.00625
AFIX  23
H33A  2   -0.825210   -0.279793   -0.240797    11.00000   -1.20000
H33B  2   -0.919853   -0.321133   -0.265685    11.00000   -1.20000
AFIX   0
C34   1   -0.836181   -0.363863   -0.331966    11.00000    0.02922    0.02047 =
         0.02979    0.00218    0.01288    0.00616
AFIX  23
H34A  2   -0.833887   -0.411405   -0.305302    11.00000   -1.20000
H34B  2   -0.875759   -0.383564   -0.373895    11.00000   -1.20000
AFIX   0
C35   1   -0.749985   -0.325772   -0.356726    11.00000    0.02518    0.02215 =
         0.02497    0.00160    0.01012    0.00752
AFIX  23
H35A  2   -0.709431   -0.310754   -0.315136    11.00000   -1.20000
H35B  2   -0.731383   -0.365968   -0.391325    11.00000   -1.20000
AFIX   0
C36   1   -0.758123   -0.253238   -0.463251    11.00000    0.01892    0.02452 =
         0.02027   -0.00320    0.00684    0.00239
C37   1   -0.785425   -0.177704   -0.483271    11.00000    0.02304    0.02869 =
         0.01198   -0.00195    0.00269    0.00590
AFIX  23
H37A  2   -0.844224   -0.191940   -0.501451    11.00000   -1.20000
H37B  2   -0.750009   -0.151043   -0.520032    11.00000   -1.20000
AFIX   0
C38   1   -0.939622   -0.238947   -0.380419    11.00000    0.01749    0.03283 =
         0.02317   -0.00459    0.00420    0.00218
AFIX  23
H38A  2   -0.941742   -0.187364   -0.401124    11.00000   -1.20000
H38B  2   -0.924199   -0.277147   -0.418873    11.00000   -1.20000
AFIX   0
C39   1   -1.026861   -0.277892   -0.356993    11.00000    0.01933    0.03961 =
         0.03524   -0.00677    0.00555   -0.00512
AFIX  33
H39A  2   -1.027087   -0.331842   -0.340980    11.00000   -1.50000
H39B  2   -1.067190   -0.284883   -0.397574    11.00000   -1.50000
H39C  2   -1.041997   -0.241811   -0.317469    11.00000   -1.50000
AFIX   0
C41   1   -0.290438   -0.171261   -0.363691    11.00000    0.01705    0.01862 =
         0.01332   -0.00100    0.00246    0.00552
C42   1   -0.278132   -0.101835   -0.417320    11.00000    0.01743    0.02165 =
         0.01206   -0.00232    0.00103    0.00593
C43   1   -0.185222   -0.063586   -0.403070    11.00000    0.01778    0.02085 =
         0.01369   -0.00100    0.00388    0.00615
C44   1   -0.131878   -0.011442   -0.444023    11.00000    0.02206    0.02815 =
         0.01325   -0.00059    0.00421    0.00509
AFIX  43
H44   2   -0.151682    0.005283   -0.486706    11.00000   -1.20000
AFIX   0
C45   1   -0.048250    0.015414   -0.420166    11.00000    0.02035    0.02402 =
         0.01861   -0.00102    0.00930    0.00133
AFIX  43
H45   2   -0.011243    0.052571   -0.446185    11.00000   -1.20000
AFIX   0
C46   1   -0.018026   -0.011419   -0.358662    11.00000    0.01570    0.02708 =
         0.02404   -0.00414    0.00585    0.00316
AFIX  43
H46   2    0.039451    0.005742   -0.344687    11.00000   -1.20000
AFIX   0
C47   1   -0.072134   -0.063425   -0.317669    11.00000    0.01753    0.02500 =
         0.01716   -0.00011    0.00111    0.00759
AFIX  43
H47   2   -0.052615   -0.081605   -0.275584    11.00000   -1.20000
AFIX   0
C48   1   -0.155130   -0.087300   -0.340847    11.00000    0.01501    0.01870 =
         0.01528    0.00005    0.00350    0.00486
C49   1   -0.236524   -0.107926   -0.236406    11.00000    0.02155    0.02179 =
         0.01184    0.00163    0.00300    0.00933
C50   1   -0.322977   -0.130695   -0.209076    11.00000    0.02150    0.02578 =
         0.01624   -0.00086    0.00694    0.00578
AFIX  23
H50A  2   -0.331079   -0.085413   -0.173607    11.00000   -1.20000
H50B  2   -0.328339   -0.180817   -0.184129    11.00000   -1.20000
AFIX   0
C51   1   -0.391524   -0.146865   -0.269082    11.00000    0.01783    0.02356 =
         0.01865   -0.00087    0.00586    0.00620
AFIX  23
H51A  2   -0.394302   -0.093913   -0.287000    11.00000   -1.20000
H51B  2   -0.445853   -0.169711   -0.249174    11.00000   -1.20000
AFIX   0
C52   1   -0.376105   -0.207317   -0.332033    11.00000    0.01549    0.02090 =
         0.01734   -0.00059    0.00462    0.00491
C53   1   -0.372738   -0.290790   -0.303144    11.00000    0.02037    0.02319 =
         0.02025    0.00026    0.00726    0.00506
AFIX  23
H53A  2   -0.332881   -0.279173   -0.261101    11.00000   -1.20000
H53B  2   -0.428282   -0.315560   -0.286381    11.00000   -1.20000
AFIX   0
C54   1   -0.347238   -0.354216   -0.357949    11.00000    0.02404    0.02082 =
         0.03338   -0.00278    0.01037    0.00251
AFIX  23
H54A  2   -0.344725   -0.404517   -0.335308    11.00000   -1.20000
H54B  2   -0.388697   -0.369973   -0.398863    11.00000   -1.20000
AFIX   0
C55   1   -0.261907   -0.315657   -0.384369    11.00000    0.02397    0.02023 =
         0.02778   -0.00067    0.00893    0.00792
AFIX  23
H55A  2   -0.219183   -0.306115   -0.344621    11.00000   -1.20000
H55B  2   -0.246689   -0.353305   -0.423392    11.00000   -1.20000
AFIX   0
C56   1   -0.277651   -0.231956   -0.481855    11.00000    0.01931    0.02184 =
         0.01827   -0.00645    0.00664   -0.00081
C57   1   -0.295207   -0.148880   -0.492085    11.00000    0.02301    0.02706 =
         0.01152   -0.00274    0.00269    0.00404
AFIX  23
H57A  2   -0.353694   -0.154774   -0.508949    11.00000   -1.20000
H57B  2   -0.257848   -0.120765   -0.526954    11.00000   -1.20000
AFIX   0
C58   1   -0.446027   -0.220002   -0.391814    11.00000    0.01801    0.02601 =
         0.02081   -0.00301    0.00299    0.00415
AFIX  23
H58A  2   -0.448122   -0.165387   -0.406591    11.00000   -1.20000
H58B  2   -0.430861   -0.253251   -0.434039    11.00000   -1.20000
AFIX   0
C59   1   -0.533145   -0.262342   -0.371051    11.00000    0.01736    0.03114 =
         0.03288   -0.00374    0.00192    0.00228
AFIX  33
H59A  2   -0.534112   -0.319439   -0.362907    11.00000   -1.50000
H59B  2   -0.573711   -0.262088   -0.409909    11.00000   -1.50000
H59C  2   -0.547365   -0.232594   -0.327049    11.00000   -1.50000
AFIX   0
C61   1    0.686788   -0.192628    0.147115    11.00000    0.01486    0.01753 =
         0.01563   -0.00019    0.00545    0.00503
C62   1    0.692450   -0.132566    0.085310    11.00000    0.01534    0.01871 =
         0.01213   -0.00017    0.00465    0.00449
C63   1    0.784345   -0.087910    0.095455    11.00000    0.01351    0.02145 =
         0.01590    0.00097    0.00753    0.00489
C64   1    0.833871   -0.042361    0.047768    11.00000    0.01793    0.02274 =
         0.01839    0.00227    0.00849    0.00777
AFIX  43
H64   2    0.811528   -0.035746    0.002212    11.00000   -1.20000
AFIX   0
C65   1    0.917233   -0.006554    0.068389    11.00000    0.01788    0.02511 =
         0.02283    0.00283    0.01161    0.00623
AFIX  43
H65   2    0.951225    0.026681    0.037399    11.00000   -1.20000
AFIX   0
C66   1    0.950988   -0.019281    0.134301    11.00000    0.01130    0.02503 =
         0.02775   -0.00030    0.00622    0.00585
AFIX  43
H66   2    1.008065    0.004131    0.146993    11.00000   -1.20000
AFIX   0
C67   1    0.901405   -0.066202    0.181707    11.00000    0.01454    0.02286 =
         0.01996    0.00118    0.00405    0.00706
AFIX  43
H67   2    0.923952   -0.075421    0.226351    11.00000   -1.20000
AFIX   0
C68   1    0.818109   -0.098794    0.161177    11.00000    0.01378    0.01588 =
         0.01616   -0.00218    0.00529    0.00485
C69   1    0.739887   -0.108140    0.267425    11.00000    0.01826    0.02048 =
         0.01380    0.00195    0.00448    0.00859
C70   1    0.655382   -0.133631    0.297482    11.00000    0.02013    0.02687 =
         0.01505   -0.00042    0.00735    0.00624
AFIX  23
H70A  2    0.644267   -0.086447    0.328980    11.00000   -1.20000
H70B  2    0.655407   -0.179095    0.327296    11.00000   -1.20000
AFIX   0
C71   1    0.585747   -0.161955    0.239368    11.00000    0.01772    0.02215 =
         0.01993    0.00149    0.00931    0.00855
AFIX  23
H71A  2    0.578569   -0.113811    0.215473    11.00000   -1.20000
H71B  2    0.533030   -0.184394    0.261955    11.00000   -1.20000
AFIX   0
C72   1    0.603461   -0.228081    0.182854    11.00000    0.01232    0.01902 =
         0.01847    0.00190    0.00674    0.00180
C73   1    0.612477   -0.304439    0.219849    11.00000    0.02020    0.02040 =
         0.02380    0.00361    0.00997    0.00347
AFIX  23
H73A  2    0.652563   -0.285593    0.261528    11.00000   -1.20000
H73B  2    0.558029   -0.329509    0.238452    11.00000   -1.20000
AFIX   0
C74   1    0.641750   -0.371569    0.171400    11.00000    0.02502    0.01859 =
         0.03187    0.00372    0.01247    0.00326
AFIX  23
H74A  2    0.647384   -0.417336    0.199192    11.00000   -1.20000
H74B  2    0.600702   -0.394115    0.130924    11.00000   -1.20000
AFIX   0
C75   1    0.725992   -0.331958    0.142980    11.00000    0.02378    0.02110 =
         0.02674    0.00385    0.01169    0.00702
AFIX  23
H75A  2    0.768337   -0.314377    0.183127    11.00000   -1.20000
H75B  2    0.744426   -0.372345    0.108458    11.00000   -1.20000
AFIX   0
C76   1    0.708926   -0.263252    0.035019    11.00000    0.01906    0.02206 =
         0.01885   -0.00406    0.00756    0.00218
C77   1    0.677577   -0.189878    0.015809    11.00000    0.01845    0.02554 =
         0.01436   -0.00340    0.00349    0.00212
AFIX  23
H77A  2    0.617723   -0.205995    0.000871    11.00000   -1.20000
H77B  2    0.709251   -0.163796   -0.023229    11.00000   -1.20000
AFIX   0
C78   1    0.531440   -0.251737    0.123747    11.00000    0.01567    0.02422 =
         0.02336    0.00045    0.00519    0.00158
AFIX  23
H78A  2    0.528612   -0.201719    0.100787    11.00000   -1.20000
H78B  2    0.545361   -0.292154    0.086413    11.00000   -1.20000
AFIX   0
C79   1    0.445364   -0.288336    0.150094    11.00000    0.01737    0.02889 =
         0.03563   -0.00013    0.00876   -0.00075
AFIX  33
H79A  2    0.445653   -0.340866    0.168706    11.00000   -1.50000
H79B  2    0.403850   -0.297745    0.110136    11.00000   -1.50000
H79C  2    0.431453   -0.249842    0.188319    11.00000   -1.50000
AFIX   0
MOLE  2
C80   1    0.384784   -0.276488   -0.089937    11.00000    0.02750    0.02908 =
         0.02325    0.00325    0.00518    0.00846
AFIX  13
H80   2    0.329010   -0.309648   -0.078933    11.00000   -1.20000
AFIX   0
C81   1    0.877998   -0.285008   -0.101753    11.00000    0.03118    0.03723 =
         0.02554    0.00019    0.00922    0.01140
AFIX  13
H81   2    0.831794   -0.315808   -0.074649    11.00000   -1.20000
AFIX   0
C82   1   -0.627797   -0.539258   -0.409952    11.00000    0.02978    0.02698 =
         0.04197   -0.00563    0.00858    0.00453
AFIX  13
H82   2   -0.637284   -0.598153   -0.431130    11.00000   -1.20000
AFIX   0
C83   1   -0.849356   -0.462269   -0.598020    11.00000    0.04042    0.02882 =
         0.06100   -0.00448    0.00158    0.01081
AFIX  13
H83   2   -0.796672   -0.420306   -0.583157    11.00000   -1.20000
AFIX   0
C84   1   -0.603339   -0.286436   -0.610784    11.00000    0.02687    0.03370 =
         0.02071   -0.00020    0.00927    0.00188
AFIX  13
H84   2   -0.632410   -0.296004   -0.565165    11.00000   -1.20000
AFIX   0
C85   1   -0.119437   -0.283071    0.383142    11.00000    0.02838    0.03234 =
         0.02421    0.00609    0.00705    0.01046
AFIX  13
H85   2   -0.171273   -0.310254    0.405770    11.00000   -1.20000
AFIX   0
C86   1   -0.132236   -0.544719    0.123297    11.00000    0.04798    0.02519 =
         0.04028   -0.01083    0.01592   -0.00244
AFIX  13
H86   2   -0.135830   -0.604844    0.109752    11.00000   -1.20000
AFIX   0
C87   1    0.361200   -0.542656    0.115692    11.00000    0.03996    0.02748 =
         0.03251   -0.00599    0.01063    0.00232
AFIX  13
H87   2    0.344573   -0.603164    0.099461    11.00000   -1.20000
AFIX   0
CL1   5    0.413213   -0.190441   -0.024451    11.00000    0.03838    0.04369 =
         0.04353   -0.01187    0.00728   -0.00172
CL2   5    0.456921   -0.338982   -0.087233    11.00000    0.05115    0.05592 =
         0.10197   -0.00050    0.00389    0.03402
CL3   5    0.376945   -0.243502   -0.174915    11.00000    0.07784    0.08567 =
         0.02991    0.02170   -0.00224    0.00651
CL4   5    0.912115   -0.185184   -0.055827    11.00000    0.06142    0.03813 =
         0.06308   -0.00579   -0.01223    0.00082
CL5   5    0.956692   -0.339674   -0.105031    11.00000    0.06614    0.09993 =
         0.11944    0.00671    0.01381    0.06325
CL6   5    0.837425   -0.280161   -0.188519    11.00000    0.10468    0.06680 =
         0.02724    0.00278   -0.00825    0.03011
CL7   5   -0.709414   -0.529773   -0.353674    11.00000    0.04514    0.04440 =
         0.06064    0.00397    0.02355    0.01546
CL8   5   -0.626180   -0.477230   -0.480568    11.00000    0.08604    0.04412 =
         0.03758   -0.00006    0.01016    0.00927
CL9   5   -0.531819   -0.512741   -0.359909    11.00000    0.03482    0.05426 =
         0.09499    0.00940   -0.00897    0.00316
CL10  5   -0.831941   -0.522021   -0.676623    11.00000    0.05983    0.03633 =
         0.05765   -0.00326    0.01331   -0.00335
CL11  5   -0.875411   -0.524021   -0.527538    11.00000    0.09427    0.05549 =
         0.05223   -0.00943    0.00903    0.01196
CL12  5   -0.927091   -0.409892   -0.614286    11.00000    0.09247    0.12977 =
         0.15050    0.01491   -0.00030    0.08505
CL13  5   -0.494299   -0.268102   -0.591873    11.00000    0.03292    0.05341 =
         0.03173    0.00412   -0.00174   -0.00057
CL14  5   -0.629416   -0.200373   -0.644463    11.00000    0.04127    0.03436 =
         0.04268    0.00761    0.01585    0.00987
CL15  5   -0.636554   -0.375251   -0.672373    11.00000    0.03844    0.03419 =
         0.05059   -0.00975   -0.00217    0.00382
CL16  5   -0.136873   -0.194278    0.349031    11.00000    0.03147    0.03906 =
         0.04031    0.01731    0.00338    0.01127
CL17  5   -0.098039   -0.353944    0.313029    11.00000    0.03973    0.04770 =
         0.03338    0.00016    0.01530    0.01576
CL18  5   -0.038199   -0.256824    0.449452    11.00000    0.06573    0.05895 =
         0.05036   -0.00220   -0.02745    0.02772
CL19  5   -0.052431   -0.508183    0.190024    11.00000    0.03477    0.02818 =
         0.05430   -0.00688    0.01698   -0.00050
CL20  5   -0.229187   -0.533554    0.156529    11.00000    0.04172    0.03969 =
         0.06261   -0.00499    0.00531    0.01485
CL21  5   -0.110905   -0.493664    0.045842    11.00000    0.13536    0.04906 =
         0.03493   -0.00841    0.02101   -0.02473
CL22  5    0.271978   -0.508801    0.141606    11.00000    0.04010    0.04503 =
         0.07978   -0.00085    0.00872    0.01694
CL23  5    0.433626   -0.526489    0.189859    11.00000    0.05305    0.04545 =
         0.05945   -0.00887   -0.00845    0.01648
CL24  5    0.407795   -0.491863    0.045106    11.00000    0.11312    0.07069 =
         0.03735   -0.01130    0.03065   -0.03759
MOLE  0
HKLF  4
 
REM  XZRVI-199b in P-1
REM R1 =  0.0872 for  18747 Fo > 4sig(Fo)  and  0.1309 for all  27892 data
REM   1153 parameters refined using      0 restraints
 
END  
     
WGHT      0.1020     19.1528 
REM Highest difference peak  1.815,  deepest hole -1.439,  1-sigma level  0.121
Q1    1   0.9429 -0.1858 -0.0890  11.00000  0.05    1.82
Q2    1   0.9417 -0.3634 -0.1325  11.00000  0.05    1.31
Q3    1   0.9788 -0.3001 -0.1100  11.00000  0.05    1.27
Q4    1  -0.9165 -0.5003 -0.5448  11.00000  0.05    1.12
Q5    1  -0.9302 -0.4056 -0.5639  11.00000  0.05    1.11
Q6    1   0.4393 -0.3508 -0.1271  11.00000  0.05    1.02
Q7    1   0.9520 -0.3525 -0.0734  11.00000  0.05    0.98
Q8    1  -0.6750 -0.4897 -0.3307  11.00000  0.05    0.96
Q9    1   0.4195 -0.5066  0.0482  11.00000  0.05    0.96
Q10   1   0.8818 -0.2950 -0.1909  11.00000  0.05    0.91
;
_iucr_refine_reflections_details
;
  -3   0   0 80.7276  6.8348   3
  -3   0   0 69.3928  6.1504   2
   3   0   0 75.0916  8.8906   3
   3   0   0 74.5917  6.1807   2
  -4   0   0 4481.43  339.60   3
  -5   0   0 192.697  15.757   5
  -5   0   0 185.269  14.979   2
  -5   0   0 215.610  16.019   3
   5   0   0 198.400  16.160   3
   5   0   0 194.083  15.180   2
  -6   0   0 1592.38  117.69   5
  -6   0   0 1702.62  122.19   3
   6   0   0 1536.40  121.99   3
   6   0   0 1593.44  116.07   2
  -7   0   0 -4.2104  2.6756   5
   7   0   0 2.56370 2.36930   3
   7   0   0 -3.4281  1.9144   2
   8   0   0 166.703  14.204   3
   8   0   0 140.276  24.814   2
  -9   0   0 1571.43  113.18   5
   9   0   0 1521.29  111.89   2
   9   0   0 1525.97  117.57   3
 -10   0   0 536.259  39.665   5
  10   0   0 506.784  45.497   3
  10   0   0 535.359  44.629   2
 -11   0   0 286.781  22.279   5
  11   0   0 284.533  22.753   2
  11   0   0 284.193  23.657   3
 -12   0   0 827.881  62.027   5
  12   0   0 819.609  62.022   2
  12   0   0 844.604  66.394   3
 -13   0   0 10.4373  3.3405   5
  13   0   0 11.3572  5.7455   3
  13   0   0 13.0696  5.4111   2
 -14   0   0 -4.6083  3.5070   5
  14   0   0 -2.1280 17.0464   3
 -15   0   0 59.3235  6.8542   5
  15   0   0 54.1121  8.4259   3
 -16   0   0 1.52775 8.91012   5
  16   0   0  9.7010 12.2583   3
 -17   0   0 -0.1564  3.7324   5
  17   0   0 -1.9983  4.5839   3
  18   0   0 3.03478 6.85738   3
 -19   0   0 -3.8631  5.9031   4
  19   0   0 -4.8250  6.5061   3
 -20   0   0 46.2092  9.3889   4
  20   0   0 58.8816  9.9940   3
 -21   0   0 6.29427 6.49490   4
  21   0   0 -9.2780  7.4106   3
  22   0   0 129.156  15.635   3
  22  -1   0 0.37879 7.96708   3
 -22   1   0 2.16555 5.94973   4
  21  -1   0 -3.4618  7.3530   3
 -21   1   0 -4.1814  5.6942   4
  20  -1   0 95.6933 12.7115   3
 -20   1   0 99.4448 12.6848   4
  19  -1   0 -2.0729  4.7030   3
 -19   1   0 -5.7713  5.1460   4
  18  -1   0 100.372  11.984   3
 -18   1   0 85.7714  9.4565   5
  17  -1   0 211.871  20.314   3
 -17   1   0 216.039  18.018   5
  16  -1   0  8.3121 15.2896   3
 -16   1   0 1.47343 6.03975   5
  15  -1   0 147.603  14.341   3
 -15   1   0 149.389  12.856   5
  14  -1   0 268.032  29.119   3
 -14   1   0 272.112  21.955   5
  13  -1   0 43.3387  7.2494   3
 -13   1   0 40.1040  5.1423   5
  12  -1   0 941.862  72.852   3
  12  -1   0 886.738  69.380   2
 -12   1   0 977.910  69.626   5
  11  -1   0 74.2269  8.6887   3
  11  -1   0 68.8232  7.5317   2
 -11   1   0 75.7966  6.8979   5
  10  -1   0 126.954  12.255   3
  10  -1   0 124.876  14.656   2
 -10   1   0 141.490  11.029   5
   9  -1   0 229.295  19.214   3
   9  -1   0 229.826  18.318   2
  -9   1   0 225.795  17.667   5
   8  -1   0 30.6179  9.4515   2
   7  -1   0 288.405  22.583   2
   7  -1   0 305.478  23.740   3
   6  -1   0 25.0373 12.0092   2
   6  -1   0 29.4433 18.3285   3
  -6   1   0 22.0095  3.4847   2
   5  -1   0 507.723  36.992   2
   5  -1   0 515.968  38.944   3
  -5   1   0 523.165  38.947   3
  -5   1   0 470.701  36.866   2
   3  -1   0 29.7862  3.8772   2
   3  -1   0 32.7267  8.4897   1
   3  -1   0 29.2826  4.9165   3
  -3   1   0 35.6063  3.4671   3
  -3   1   0 31.3154  2.6162   1
  -3   1   0 31.9514  3.3651   2
  -3   1   0 32.5394  4.4339   1
  -3  -1   0 78.4354  6.4340   2
  -3  -1   0 81.6536  6.6214   5
  -3  -1   0 86.8374  6.8636   3
   3   1   0 74.1493  6.4736   2
   3   1   0 80.3531  6.3643   5
   3   1   0 79.6454  6.7648   3
  -5  -1   0 33.0557  3.9769   1
  -5  -1   0 41.2585  5.8997   3
  -5  -1   0 38.1170  4.7896   2
  -5  -1   0 31.3495  7.2070   5
   6   1   0 261.326  76.095   1
  -7  -1   0 477.669  33.511   5
  -7  -1   0 423.004  30.859   1
   7   1   0 388.835  32.441   1
   7   1   0 459.671  34.746   3
   7   1   0 467.181  33.237   2
  -8  -1   0 4487.14  325.88   5
   8   1   0 4393.43  317.89   2
   8   1   0 4386.30  334.34   3
  -9  -1   0 94.6885  8.5131   5
   9   1   0 104.755  10.744   2
   9   1   0 92.7285  9.5079   3
 -10  -1   0 590.884  46.589   5
  10   1   0 626.672  48.682   3
  10   1   0 644.774  48.678   2
 -11  -1   0 247.713  20.015   5
  11   1   0 229.312  21.792   3
  11   1   0 259.200  20.337   2
 -12  -1   0 360.280  27.957   5
  12   1   0 351.551  28.282   2
  12   1   0 360.982  29.657   3
 -13  -1   0 4.25857 5.74199   5
  13   1   0 -5.7473  5.1322   2
  14   1   0 11.6824  7.9482   2
  14   1   0 -3.7209 10.7339   3
 -15  -1   0 10.3699  4.1917   5
  15   1   0 6.84617 5.72557   3
  16   1   0 33.3843  7.5035   3
 -17  -1   0 -1.3464  4.1024   5
  17   1   0 4.25481 6.14083   3
 -20  -1   0 26.0346 20.2805   4
  20   1   0 42.5256  8.9240   3
 -21  -1   0 -2.0800  5.1203   4
  21   1   0 2.35149 6.96540   3
  22   1   0 18.8955  7.8625   3
  22  -2   0 -5.2014  8.0010   3
 -22   2   0 -2.2200  7.8366   4
 -21   2   0 36.4092  9.2093   4
  20  -2   0 18.2363  6.1922   3
 -20   2   0 -2.0612  7.6998   4
  19  -2   0 -6.0599  7.1640   3
 -19   2   0 -11.456   7.022   4
  18  -2   0 89.7117 11.7584   3
 -18   2   0 86.9164 11.8491   4
 -18   2   0 78.5341  8.8051   5
  17  -2   0 473.002  40.393   3
 -17   2   0 506.318  37.838   5
  16  -2   0 118.107  14.420   3
 -16   2   0 107.389  10.223   5
  15  -2   0 29.5079  6.8515   3
 -15   2   0 18.8528  3.8889   5
  14  -2   0 183.615  17.494   3
 -14   2   0 181.699  15.084   5
  13  -2   0 5.62044 9.35816   3
 -13   2   0 4.69650 2.78140   5
  12  -2   0 85.4926 16.4148   3
 -12   2   0 80.8258  9.6323   5
  11  -2   0 32.4073  6.2004   3
 -11   2   0 39.6027  4.4159   5
  10  -2   0 194.612  17.185   3
  10  -2   0 178.967  15.617   2
   9  -2   0 401.092  33.019   3
   7  -2   0 107.952  12.257   2
   7  -2   0 114.261  10.026   3
   7  -2   0 114.408   8.912   1
   6  -2   0 1344.51   94.19   3
   6  -2   0 1195.01   88.68   2
  -6   2   0 1187.69   89.80   2
  -6   2   0 1168.85   91.30   1
   5  -2   0 45.8090  5.1115   3
   5  -2   0 43.8752  6.1695   2
   5  -2   0 46.7901  4.9362   1
  -5   2   0 43.9205  3.6468   1
  -5   2   0 41.8800  4.0183   2
  -5   2   0 50.5634  4.8079   3
  -5   2   0 36.4727  3.4914   1
   4  -2   0 2085.96  158.84   2
   4  -2   0 2337.66  167.36   3
   3  -2   0 38.6882  3.1024   1
   3  -2   0 39.9203  7.5424   1
  -3   2   0 40.1329  4.0335   1
  -3   2   0 34.4104  3.6568   1
  -3   2   0 43.1169  4.7705   2
  -3   2   0 38.5096  3.9316   3
   2  -2   0 10.2127 12.4517   1
   2  -2   0 10.8652 19.2691   1
  -2   2   0 14.1535 22.0224   1
  -2   2   0 24.0555 34.1033   4
  -2   2   0 10.7016 21.2380   1
  -1  -2   0 13.7850 20.5507   2
  -1  -2   0 12.0652 12.5885   1
  -1  -2   0 12.6107 18.1554   1
   1   2   0 18.3762 23.1035   1
  -2  -2   0 1.34827 2.87303   1
  -2  -2   0 5.38009 2.86434   2
  -2  -2   0 -1.0576  3.2769   1
  -2  -2   0 -4.6639 16.2125   5
  -2  -2   0 -0.7550  4.2213   4
   2   2   0 6.02875 4.68483   5
   2   2   0 16.8397  9.5126   2
   2   2   0 7.04406 4.97714   1
   2   2   0 15.3577  6.4548   1
   2   2   0  2.3061 19.4139   3
  -3  -2   0 58.2832 10.6175   5
  -3  -2   0 38.2734  6.0183   1
  -3  -2   0 48.9719  4.7772   2
  -3  -2   0 49.3107  5.6305   3
   3   2   0 48.8245  5.0115   5
   3   2   0 39.7186  5.3284   1
   3   2   0 33.3202  5.5591   1
   3   2   0 44.3633  5.4100   2
   3   2   0 48.2740  5.0856   3
  -4  -2   0 251.519  18.056   3
  -4  -2   0 243.448  17.606   5
  -4  -2   0 217.007  17.189   2
   4   2   0 219.515  17.772   5
   4   2   0 241.210  20.530   3
   4   2   0 229.179  17.308   2
   4   2   0 199.359  15.957   1
  -5  -2   0 54.6991  4.9251   3
  -5  -2   0 45.3513  6.1745   5
  -5  -2   0 41.3606  4.2819   2
  -5  -2   0 42.7314  4.0327   1
   5   2   0 40.7452  4.7898   1
   5   2   0 48.3310  4.5629   2
   5   2   0 48.8167  4.9577   5
   5   2   0 40.6715  4.9547   1
   5   2   0 54.0582  6.4517   3
  -6  -2   0 350.044  27.688   5
   6   2   0 362.260  29.899   3
   6   2   0 353.021  26.909   2
  -7  -2   0 131.859  10.791   1
  -7  -2   0 165.417  15.630   5
   7   2   0 141.555  10.895   1
   7   2   0 167.237  12.716   2
   7   2   0 169.469  14.110   3
  -8  -2   0 89.9634  9.8054   1
  -8  -2   0 99.7923  7.0514   1
   8   2   0 86.0714 43.7537   1
  -9  -2   0 55.3627  4.0737   1
   9   2   0 51.6417  4.3287   1
   9   2   0 51.3561  7.4264   3
   9   2   0 50.8519  6.4749   2
 -10  -2   0 370.164  30.506   5
  10   2   0 393.463  30.766   3
  10   2   0 373.631  29.609   2
 -11  -2   0 48.1839 11.0075   5
  11   2   0 45.9482 11.9531   3
  11   2   0 59.2736 11.1359   2
 -12  -2   0 456.957  37.767   5
  12   2   0 506.579  42.625   3
  12   2   0 520.502  38.644   2
 -13  -2   0 126.131  13.162   5
  13   2   0 140.065  13.129   2
  13   2   0 121.999  12.427   3
 -14  -2   0 9.45626 4.89061   5
  14   2   0 9.76150 8.61243   2
  14   2   0 6.90479 4.82362   3
 -15  -2   0 4.07284 4.38390   5
  15   2   0 4.17339 5.35767   3
  15   2   0 -3.8426  4.0974   2
 -16  -2   0 139.775  13.758   5
  16   2   0 153.625  15.072   3
 -17  -2   0 89.9576  9.7002   5
  17   2   0 66.2802 10.2429   3
 -18  -2   0  9.1617 49.5476   5
  19   2   0 61.9956  9.9814   3
 -20  -2   0 15.9011  8.5579   4
  20   2   0 31.7028  8.6641   3
  21   2   0 13.7992  7.2351   3
  22   2   0 22.0011  7.8920   3
 -22   3   0 -3.6407  7.3509   4
  21  -3   0 -8.8217  6.7403   3
 -21   3   0 -2.5384  6.2919   4
  20  -3   0 200.284  19.867   3
 -20   3   0 186.091  20.528   4
  19  -3   0 36.9365  8.9997   3
 -19   3   0 27.6033  8.1092   4
  18  -3   0 -1.8633  5.4428   3
 -18   3   0 -11.256   7.962   4
  17  -3   0 108.655  13.028   3
 -17   3   0 91.8821 12.3529   4
 -17   3   0 127.160  10.523   5
 -16   3   0 12.8998 11.3442   4
 -16   3   0 13.9104  4.2440   5
  15  -3   0 -9.8124  6.8327   3
 -15   3   0 0.26845 2.79606   5
  14  -3   0 46.0050 15.5063   3
 -14   3   0 47.9345  5.5309   5
  13  -3   0 73.8132  8.7018   3
 -13   3   0 73.2093  7.0750   5
  12  -3   0 249.449  33.952   3
  11  -3   0 370.814  31.083   3
  10  -3   0 173.371  16.820   1
  10  -3   0 202.313  13.644   1
  10  -3   0 236.390  25.579   3
 -10   3   0 202.526  13.492   1
 -10   3   0 165.465  13.394   1
   9  -3   0 13.4274  6.2644   1
  -9   3   0 10.6357  1.2866   1
   8  -3   0 1944.28  141.02   3
   8  -3   0 1821.16  126.62   1
  -8   3   0 1785.81  129.66   1
   7  -3   0 1354.11   89.29   1
   7  -3   0 1306.16   99.55   3
  -7   3   0 1372.79   89.26   1
  -7   3   0 1158.49   99.17   1
   5  -3   0 249.471  20.438   1
   5  -3   0 316.061  20.648   1
  -5   3   0 303.462  20.517   1
  -5   3   0 268.689  20.464   1
  -5   3   0 286.249  21.759   2
  -5   3   0 341.769  23.411   3
   4  -3   0 321.067  24.748   1
   4  -3   0 328.794  24.179   1
  -4   3   0 341.796  25.570   1
  -4   3   0 363.150  30.312   4
  -4   3   0 350.110  24.801   1
  -4   3   0 350.075  25.217   2
   3  -3   0 11.7511  6.4510   1
   3  -3   0 9.62207 4.02000   1
  -3   3   0 13.5201  3.8586   4
  -3   3   0 10.0143  1.2358   2
  -3   3   0 12.1474  2.3505   1
  -3   3   0 7.65483 1.48942   1
   2  -3   0 3066.67  229.43   4
  -2   3   0 2973.50  229.41   4
  -2   3   0 2774.49  200.50   1
   1  -3   0 87.0826  7.6984   1
   1  -3   0 100.768  16.151   4
   1  -3   0 87.4690  9.7408   1
  -1   3   0 94.3856  7.4467   1
  -1  -3   0 159.476  13.655   4
  -1  -3   0 143.076 103.352   1
  -1  -3   0 266.536 285.926   1
  -1  -3   0 191.927  37.160   2
   1   3   0 237.951  63.739   1
   1   3   0 138.041  18.830   1
   1   3   0 179.358  12.397   2
  -3  -3   0 93.7213  9.0120   4
  -3  -3   0 87.1512  7.8524   2
  -3  -3   0 64.8934 11.9258   1
  -3  -3   0 97.8129 24.9242   5
  -3  -3   0 83.8433  8.7255   1
   3   3   0 91.6798  7.0594   1
   3   3   0 93.5624 11.6724   3
   3   3   0 97.6700  7.6620   5
   3   3   0 80.5197  7.8679   2
  -5  -3   0 24.8470 29.2262   5
  -5  -3   0 14.8560  2.6221   1
  -5  -3   0 14.3580  4.9323   3
  -5  -3   0 14.7585  4.4675   1
   5   3   0 16.3449  3.1728   3
   5   3   0 17.1149  1.9709   1
   5   3   0 15.4412  4.2471   1
   5   3   0 15.4549  2.8286   2
   5   3   0 14.2880  2.6512   5
  -6  -3   0 52.5801  5.1250   1
  -6  -3   0 48.9946  4.3627   1
   6   3   0 69.9303  8.2664   3
   6   3   0 61.5376  9.8104   2
   6   3   0 57.8531  4.6584   1
   6   3   0 52.3748  5.3172   1
  -7  -3   0 11.2526  3.0033   1
  -7  -3   0 10.4026 13.0327   5
   7   3   0 7.81449 8.24951   2
   7   3   0 8.00127 3.66550   1
   7   3   0 11.5717  3.4300   3
   7   3   0 11.1102  1.6791   1
  -8  -3   0 666.765  48.798   5
  -8  -3   0 584.989  54.513   1
   8   3   0 665.022  48.468   2
   8   3   0 655.892  50.398   3
  -9  -3   0 312.405  24.083   1
  -9  -3   0 345.389  24.834   5
   9   3   0 323.955  25.685   3
   9   3   0 331.678  24.588   2
   9   3   0 264.761  22.497   1
 -10  -3   0 127.654  13.082   1
  10   3   0 123.873   9.222   1
  11   3   0 104.483  18.808   3
  11   3   0 108.701  13.374   2
  11   3   0 97.4762  7.3649   1
 -12  -3   0 192.837  56.718   5
  12   3   0 184.120  16.854   3
  12   3   0 157.706  15.641   2
  13   3   0 197.250  18.740   3
  13   3   0 221.386  18.487   2
 -14  -3   0 44.4502  7.2702   5
  14   3   0 40.4175  7.7029   2
  14   3   0 58.8294  7.7910   3
 -15  -3   0 38.5202  7.6678   5
  15   3   0 49.6028  7.6530   3
  15   3   0 46.2402  8.0585   2
 -16  -3   0 8.20680 7.53698   5
  16   3   0 -3.7254  5.1961   3
 -17  -3   0 126.338  13.492   5
  17   3   0 121.305  13.264   3
 -18  -3   0   3.712 160.663   5
  18   3   0 17.1209  7.9454   3
  19   3   0 45.9872  9.0739   3
  20   3   0 -0.4093  6.2708   3
  21   3   0 63.4421 10.3884   3
 -23   4   0 -2.5090  8.0500   4
 -22   4   0 4.31127 8.36932   4
 -21   4   0 -5.7989  6.7247   4
 -20   4   0 -4.0636  6.7798   4
  19  -4   0 96.6374 11.7473   3
 -19   4   0 94.6138 13.0460   4
  18  -4   0 -1.1609  8.2386   3
  17  -4   0 78.2507 10.5993   3
 -17   4   0 60.6917  9.8097   4
 -17   4   0 88.9110  7.9668   5
  16  -4   0 114.365  17.070   3
 -16   4   0 132.003  11.210   5
 -16   4   0 126.939  14.671   4
  15  -4   0 170.879  16.418   3
 -15   4   0 147.840  16.668   4
 -15   4   0 182.239  14.054   5
  14  -4   0 29.2014  7.9120   3
 -14   4   0 26.2307 10.3312   4
  13  -4   0 -1.2066 18.0377   3
  12  -4   0 226.237  21.698   1
  12  -4   0 249.799  16.876   1
 -12   4   0 237.330  20.590   1
  11  -4   0 199.267  29.471   3
  11  -4   0 176.355  12.795   1
 -11   4   0 175.006  12.698   1
  10  -4   0 469.987  40.347   3
  10  -4   0 428.133  30.832   1
 -10   4   0 437.090  31.369   1
   9  -4   0 741.419  49.694   1
   9  -4   0 683.373  55.920   3
  -9   4   0 730.184  49.597   1
   8  -4   0 181.101  13.138   1
   8  -4   0 176.858  18.071   3
  -8   4   0 182.668  13.020   1
   7  -4   0 151.721  10.842   1
   7  -4   0 134.489  10.684   1
  -7   4   0 146.981  10.720   1
  -7   4   0 151.675  10.726   1
  -7   4   0 158.855  30.183   4
   5  -4   0 123.674  44.131   1
   5  -4   0 88.2654  9.6842   1
  -5   4   0 76.8639  6.0891   1
  -5   4   0 82.7958  7.1115   3
  -5   4   0 63.8090  7.1447   1
  -5   4   0 76.5008  7.7104   2
  -5   4   0 78.3300 42.8382   4
   4  -4   0 31.5444 42.7530   1
   4  -4   0 21.3032 10.8070   1
  -4   4   0 51.5254 41.8283   4
  -4   4   0 33.6454 13.3115   1
  -4   4   0 26.1502 61.9505   1
  -4   4   0 41.8289  3.7343   2
   3  -4   0 124.293  15.281   4
   3  -4   0 148.184  10.242   1
   3  -4   0 173.159  44.695   1
  -3   4   0 175.735  59.456   4
  -3   4   0 122.583  10.876   1
  -3   4   0 165.403  51.272   1
   1  -4   0 95.9269  7.3824   5
   1  -4   0 82.5763  6.9713   1
  -1   4   0 87.3563  7.1038   1
  -1   4   0 88.5952  6.9375   1
  -1  -4   0 348.279  23.867   1
  -1  -4   0 327.527  35.869   2
   1   4   0 382.801  27.929   2
   1   4   0 334.073  23.847   1
   1   4   0 291.811  28.111   4
  -2  -4   0 333.191  27.358   4
  -2  -4   0 340.625  24.992   2
  -2  -4   0 326.723  23.857   1
   2   4   0 350.360  24.031   1
   2   4   0 370.997  27.995   4
   2   4   0 327.377  27.820   1
   2   4   0 318.907  25.297   2
  -3  -4   0 572.483  38.120   5
  -3  -4   0 476.884  35.228   1
  -3  -4   0 516.915  55.366   4
  -3  -4   0 442.007  35.098   1
   3   4   0 430.188  35.114   1
   3   4   0 504.337  35.200   1
   3   4   0 565.940  39.959   4
   3   4   0 584.505  37.940   5
   3   4   0 455.000  36.920   2
  -4  -4   0 37.7687  8.5242   5
  -4  -4   0 26.8284  2.9970   1
  -4  -4   0 27.6783  7.7785   1
  -4  -4   0 19.3903  5.1986   2
   4   4   0 17.7063  9.2895   1
   4   4   0 24.0037  3.3568   3
  -5  -4   0 -3.5301  2.8393   4
  -5  -4   0 -4.0479  7.5582   1
  -5  -4   0 18.2330 29.1047   5
   5   4   0 -5.9287  4.5508   2
   5   4   0 -0.2764  3.0286   1
   5   4   0 0.44641 5.24542   3
   5   4   0 -0.5629  1.8163   1
  -6  -4   0 5238.55  550.83   4
  -6  -4   0 5694.47  417.09   5
   6   4   0 5587.80  397.54   2
  -7  -4   0 858.435  62.285   5
  -7  -4   0 698.738  57.586   1
   7   4   0 842.789  57.752   3
   7   4   0 661.268  53.864   1
   7   4   0 751.289  51.624   1
   7   4   0 671.871  54.824   2
  -8  -4   0 29.6670  4.7650   1
  -8  -4   0 34.4210 11.3733   5
   8   4   0 32.0780 11.6516   2
   8   4   0 23.4795  5.1315   1
   8   4   0 33.8381  9.9837   3
   8   4   0 21.4251  2.7487   1
  -9  -4   0 762.042  56.290   5
   9   4   0 695.883  52.140   1
   9   4   0 736.490  58.376   3
   9   4   0 788.146  55.540   2
 -10  -4   0 106.279  15.841   5
 -10  -4   0 111.764   8.298   1
  10   4   0 107.631  14.520   3
  10   4   0 115.133  15.797   2
  10   4   0 95.8692 10.0921   1
 -11  -4   0 98.0221 18.7991   5
 -11  -4   0 76.2462  6.7439   1
  11   4   0 96.0636  9.8228   1
  11   4   0 101.455  19.956   2
  11   4   0 87.6885 18.4426   3
  12   4   0 1142.66   81.32   2
  12   4   0 1044.15   84.62   3
 -13  -4   0 70.1088 12.6797   5
  13   4   0 80.2152  9.3427   3
  13   4   0 72.7763 11.7852   2
 -14  -4   0 30.8774 13.6729   5
  14   4   0 33.7026  7.6273   3
  14   4   0 38.1668  8.5126   2
 -15  -4   0  4.8920 13.7470   5
  15   4   0 5.29560 9.48586   3
  15   4   0 -0.7215 13.4630   2
 -16  -4   0 120.052  12.408   5
  16   4   0 135.729  13.600   3
 -17  -4   0 17.8300  6.0252   5
  17   4   0 1.78894 4.42483   3
 -18  -4   0 36.8358 23.9775   5
  18   4   0 44.9429  8.8845   3
  19   4   0 14.5905  6.6963   3
  20   4   0 56.1522  9.9455   3
  21   4   0 45.7474  9.9058   3
 -23   5   0 15.1409  8.2590   4
 -22   5   0 8.92694 8.54045   4
 -21   5   0 14.6289  8.2501   4
 -20   5   0 33.1684  9.2260   4
 -19   5   0 53.6204 10.5135   4
 -18   5   0 162.125  18.136   4
 -17   5   0 49.6193  5.4910   5
 -17   5   0 34.7159  7.5179   4
 -16   5   0 12.2790  3.5097   5
 -15   5   0 7.69606 4.81645   4
 -14   5   0 62.7365  9.4007   4
  13  -5   0 59.4031  6.2005   1
 -13   5   0 55.6635  4.6336   1
 -13   5   0 68.2638  9.5515   4
  12  -5   0 934.664  63.970   1
 -12   5   0 915.564  68.687   1
  11  -5   0 14.7019  2.4469   1
  11  -5   0 19.0961  5.7706   1
 -11   5   0 21.8304  2.3059   1
 -11   5   0 26.3245 10.2171   4
  10  -5   0 450.160  31.314   1
  10  -5   0 379.221  32.009   1
 -10   5   0 495.520  42.713   4
 -10   5   0 470.838  31.269   1
   9  -5   0 860.886  61.751   1
   9  -5   0 905.118  61.843   1
  -9   5   0 908.124  61.744   1
  -9   5   0 904.890  71.666   4
   8  -5   0 44.1581  4.5589   1
   8  -5   0 50.9742  4.5287   1
  -8   5   0 44.8788  5.4493   1
  -8   5   0 42.7102 14.5480   4
   7  -5   0 -0.2129  2.6781   1
   7  -5   0 -1.4659  6.5752   1
  -7   5   0 4.50687 5.72654   4
   6  -5   0 308.318  20.029   1
   6  -5   0 239.607  19.678   1
  -6   5   0 309.052  19.886   1
  -6   5   0 258.521  20.665   2
  -6   5   0 272.731  23.102   4
   5  -5   0 71.3973  7.4215   1
   5  -5   0 77.8525  6.4327   1
  -5   5   0 74.9559  6.1291   1
  -5   5   0 81.0148  8.2653   4
  -5   5   0 66.7887  5.9930   2
   3  -5   0 419.522  32.068   1
  -3   5   0 437.554  32.080   1
  -3   5   0 476.685  32.110   1
  -3   5   0 502.805  39.630   4
   1  -5   0 127.046  36.051   1
   1  -5   0 201.093  21.904   4
   1  -5   0 203.295  22.569   5
   1  -5   0 136.208  38.641   1
  -1   5   0 229.504  15.280   5
  -1   5   0 183.800  19.645   4
  -1   5   0 185.718  24.020   1
  -1   5   0 187.153  15.625   1
  -1  -5   0 -2.1423  7.9707   1
  -1  -5   0 0.48571 7.03058   4
  -1  -5   0 -0.5105 12.9685   5
   1   5   0 6.13167 6.84793   1
   1   5   0 7.19889 4.75808   5
   1   5   0 7.08830 7.41752   1
   1   5   0 1.98183 4.47979   2
   1   5   0 22.4838 10.1100   4
  -2  -5   0 983.184  75.178   5
  -2  -5   0 896.454  82.882   4
   2   5   0 993.527  69.765   1
   2   5   0 1132.50   74.77   5
   2   5   0 945.548  69.688   1
   2   5   0 1104.12   79.83   4
  -3  -5   0 749.249  50.223   1
  -3  -5   0 606.655  57.294   2
  -3  -5   0 758.701  61.091   5
   3   5   0 816.487  56.970   4
   3   5   0 729.352  50.125   1
   3   5   0 646.644  52.412   2
   3   5   0 723.982  50.074   1
  -4  -5   0 146.583  11.698   1
  -4  -5   0 156.153  16.800   4
  -4  -5   0 160.602  12.816   5
   4   5   0 165.070  12.777   3
   4   5   0 145.772  13.336   2
   4   5   0 140.762  11.323   1
  -5  -5   0 31.3559  4.1266   1
  -5  -5   0 30.8355  5.0335   5
   5   5   0 31.7166  9.5509   1
   5   5   0 22.7760  7.6448   1
   5   5   0 28.9580  7.9186   3
   5   5   0 28.3172 11.6981   2
  -6  -5   0 1019.04   82.74   4
  -6  -5   0 980.830  72.848   5
  -6  -5   0 954.264  67.895   1
   6   5   0 845.390  67.994   1
   6   5   0 1005.34   67.59   1
   6   5   0 1032.34   74.95   3
   6   5   0 1002.80   71.37   2
  -7  -5   0 1937.08  156.58   5
  -7  -5   0 1819.29  143.28   1
   7   5   0 2036.23  145.77   3
   7   5   0 1955.47  131.44   1
   7   5   0 2022.18  138.73   2
   7   5   0 1692.35  139.13   1
  -8  -5   0 164.380  13.060   1
  -8  -5   0 191.908  16.020   5
   8   5   0 165.508  14.518   2
   8   5   0 187.027  13.047   1
   8   5   0 195.071  21.075   3
   8   5   0 158.085  14.695   1
  -9  -5   0 208.386  14.458   1
  -9  -5   0 203.171  22.950   5
   9   5   0 175.542  19.861   1
   9   5   0 166.972  14.028   1
   9   5   0 210.887  16.477   2
   9   5   0 187.615  19.817   3
 -10  -5   0 563.428  45.029   5
  10   5   0 579.239  45.708   3
  10   5   0 524.308  40.475   1
  10   5   0 657.446  44.182   2
  10   5   0 568.708  48.531   1
 -11  -5   0 13.9917 14.6610   5
 -11  -5   0 19.1789  7.4005   1
  11   5   0 16.6715  7.9504   3
  11   5   0 14.5681 14.2061   2
  11   5   0 12.3965  3.1284   1
 -12  -5   0 163.390  81.163   5
  12   5   0 127.326  11.291   1
  12   5   0 178.098  15.028   3
 -13  -5   0 90.5139 13.2303   5
  13   5   0 77.8450  9.3320   3
  13   5   0 74.7667  6.3134   1
  13   5   0 88.7186 10.0305   2
 -14  -5   0 155.524  15.450   5
  14   5   0 181.665  16.055   2
  14   5   0 169.596  15.913   3
 -15  -5   0 17.1959 14.6764   5
  15   5   0 18.9860  7.1113   3
  15   5   0 32.0873  7.1939   2
 -16  -5   0 53.5438 10.0197   5
  16   5   0 37.3405  7.8891   3
  17   5   0 -0.9261  5.1118   3
 -18  -5   0 182.517  18.163   5
  18   5   0 198.229  18.674   3
  19   5   0 38.6857  8.6737   3
  20   5   0 14.9727  7.4937   3
 -23   6   0 144.550  17.356   4
 -22   6   0 52.3544 10.5351   4
 -21   6   0 54.4253 11.2230   4
 -20   6   0 21.8139  8.4958   4
 -19   6   0 -7.0118  9.1849   4
 -18   6   0 -12.460  14.766   4
 -17   6   0 28.5742  7.2581   4
 -17   6   0 21.5031  3.8690   5
 -16   6   0 28.8933 18.0108   4
  15  -6   0 9.68376 2.15041   1
 -15   6   0 17.2815  7.1132   4
  14  -6   0 41.7546  4.2644   1
  13  -6   0 113.364  10.057   1
 -13   6   0 114.328   8.889   1
 -13   6   0 130.284  12.925   4
  12  -6   0 359.290  27.127   1
  12  -6   0 377.307  27.168   1
 -12   6   0 369.473  26.994   1
 -12   6   0 433.175  33.220   4
  11  -6   0 24.4930  4.7276   1
  11  -6   0 22.0436  5.9153   1
 -11   6   0 22.6166  2.8496   1
 -11   6   0 21.5021  8.3296   4
  10  -6   0 19.4281  3.0182   1
  10  -6   0 22.3093  4.4019   1
 -10   6   0 21.7818  3.5994   1
   9  -6   0 23.4946  3.7501   1
   9  -6   0 29.1530  6.5635   1
  -9   6   0 29.9123  9.4538   4
  -9   6   0 36.4659  3.4567   1
   8  -6   0 798.368  54.193   1
   8  -6   0 682.591  53.942   1
  -8   6   0 810.912  54.078   1
  -8   6   0 823.407  64.974   4
   7  -6   0 195.608  16.055   1
   7  -6   0 145.281  12.738   1
  -7   6   0 179.958  19.230   4
  -7   6   0 181.728  12.941   1
   6  -6   0 248.959  17.980   1
  -6   6   0 220.642  18.282   2
  -6   6   0 268.844  26.628   4
  -6   6   0 252.173  18.578   1
   5  -6   0 66.5656 14.1993   1
   5  -6   0 45.3661  4.1680   1
  -5   6   0 15.8414 18.1009   4
  -5   6   0 31.9427  4.1900   5
   4  -6   0 228.641  18.607   1
   4  -6   0 207.132  16.549   1
  -4   6   0 215.977  17.118   1
  -4   6   0 210.066  22.674   4
   3  -6   0 669.638  58.532   4
   3  -6   0 805.255  55.028   5
   3  -6   0 734.731  52.740   1
  -3   6   0 737.120  51.688   1
   2  -6   0 2230.27  326.04   4
   1  -6   0 633.682  46.145   4
   1  -6   0 559.524  44.193   1
   1  -6   0 580.056  43.455   5
  -1   6   0 543.621  44.597   1
  -1   6   0 610.849  40.582   1
  -1   6   0 506.676  46.439   4
   0  -6   0 4575.87  443.37   4
   0   6   0 5209.89  337.49   1
  -1  -6   0 581.737  47.317   5
  -1  -6   0 591.433  38.722   1
   1   6   0 486.010  37.532   1
   1   6   0 466.845  43.267   4
   1   6   0 568.546  37.681   1
  -2  -6   0 243.258  22.529   4
  -2  -6   0 224.433  24.948   2
  -2  -6   0 281.880  20.961   5
   2   6   0 260.498  19.124   1
   2   6   0 292.894  20.649   1
   2   6   0 274.903  22.459   4
  -3  -6   0 24.9597  8.4995   2
  -3  -6   0 33.5801 15.5042   5
  -3  -6   0 30.4691  6.4613   1
  -3  -6   0 26.2306  9.8766   4
   3   6   0 19.5008  9.2239   4
   3   6   0 26.5866  4.5634   1
   3   6   0 23.3459  3.5386   1
  -4  -6   0 127.054   9.423   1
  -4  -6   0 116.894  16.650   4
  -4  -6   0 108.665  10.319   5
   4   6   0 110.236   9.473   2
   4   6   0 113.224   9.250   1
  -5  -6   0 570.129  42.129   5
  -5  -6   0 544.208  54.901   4
  -5  -6   0 532.767  42.490   1
   5   6   0 569.742  40.896   2
   5   6   0 556.148  39.581   1
   5   6   0 606.839  43.102   3
   5   6   0 484.349  38.812   1
  -6  -6   0 2827.75  205.50   1
   6   6   0 2992.52  223.68   3
   6   6   0 2915.09  199.51   1
  -7  -6   0 551.729  46.663   1
  -7  -6   0 652.822  69.524   5
   7   6   0 721.762  48.473   2
   7   6   0 731.513  50.855   3
   7   6   0 593.557  45.337   1
  -8  -6   0 335.776  26.180   1
  -8  -6   0 388.201  28.898   5
   8   6   0 392.603  32.007   2
   8   6   0 336.105  25.678   1
  -9  -6   0 297.424  25.139   1
  -9  -6   0 381.913  28.271   5
   9   6   0 289.795  25.770   2
   9   6   0 366.393  27.855   3
 -10  -6   0 268.559  20.936   1
 -10  -6   0 264.241  28.064   5
  10   6   0 293.249  21.093   1
  10   6   0 302.378  24.207   3
  10   6   0 312.822  27.692   2
  10   6   0 293.050  20.866   1
 -11  -6   0 73.0638  8.8782   1
 -11  -6   0 77.4686 19.5722   5
  11   6   0 101.553  10.848   2
  11   6   0 84.5984  9.4376   1
  11   6   0 76.3481 10.0320   3
 -12  -6   0 37.1979 75.7320   5
  12   6   0 25.8255  6.6468   2
  12   6   0 27.7059  7.2999   3
  12   6   0  22.711 134.525   1
 -13  -6   0 40.8157 10.7739   5
  13   6   0 55.8664  7.3641   3
  13   6   0 57.6795  7.9713   2
  13   6   0 43.0438  5.0075   1
  14   6   0 8.19991 2.27339   1
  14   6   0 17.3901  5.9239   2
  14   6   0 1.82913 6.15277   3
 -15  -6   0 55.3310  9.1137   5
  15   6   0 71.2707  9.3621   2
  15   6   0 62.3061  8.5503   3
  16   6   0 270.834  23.998   3
 -17  -6   0 71.7704 10.7831   5
  17   6   0 74.9853  9.2980   3
 -18  -6   0 -5.1061 10.4049   5
  18   6   0 -8.7834  9.4908   3
 -19  -6   0 114.412  13.285   5
  19   6   0 110.370  13.304   3
 -23   7   0 3.65756 7.94396   4
 -21   7   0 -0.8094  7.6137   4
 -20   7   0 -13.385   8.491   4
 -19   7   0 181.818  19.296   4
 -18   7   0 29.6910  9.9964   4
 -17   7   0 126.117  15.151   4
  16  -7   0 53.9079  4.5909   1
 -15   7   0 -17.771  11.072   4
 -14   7   0 -4.9996 10.1872   4
  13  -7   0 4.19557 2.95546   1
 -13   7   0 -0.9206 10.6326   4
  12  -7   0 546.173  40.144   1
  12  -7   0 575.200  40.245   1
 -12   7   0 614.993  47.671   4
 -12   7   0 552.729  40.019   1
  11  -7   0 397.243  28.834   1
 -11   7   0 403.481  28.640   1
 -11   7   0 408.502  34.189   4
  10  -7   0 19.6538  3.3935   1
 -10   7   0 16.2272  5.0188   4
 -10   7   0 15.8470  2.7645   1
   9  -7   0 181.890  14.557   1
   9  -7   0 213.142  19.814   1
  -9   7   0 195.665  21.684   4
  -9   7   0 193.093  14.478   1
   8  -7   0 179.865  14.236   1
  -8   7   0 194.852  14.802   1
   7  -7   0 30.9635 15.2476   1
  -7   7   0 29.2219 26.8941   4
   6  -7   0 576.831  42.358   1
  -6   7   0 633.307  42.852   1
   5  -7   0 237.834  18.582   1
   5  -7   0 288.799  19.020   1
  -5   7   0 231.540  18.467   1
   4  -7   0 6672.95  548.46   5
   4  -7   0 5454.94  424.65   1
   3  -7   0 57.3599  6.5237   5
  -3   7   0 53.6777  7.3499   1
  -3   7   0 66.6136  6.9419   4
   2  -7   0 160.712  18.556   5
  -2   7   0 173.958  15.578   4
  -2   7   0 151.574  14.280   1
   1  -7   0 650.575  51.778   5
   1  -7   0 652.491  47.702   1
  -1   7   0 732.982  54.961   4
   0  -7   0 3783.18  256.97   5
   0  -7   0 3501.21  304.62   4
   0   7   0 3145.94  282.60   4
   0   7   0 3274.54  234.30   1
  -1  -7   0 157.984  13.299   4
  -1  -7   0 230.120 154.636   5
   1   7   0 127.162  11.065   2
  -2  -7   0 193.749  16.166   4
   2   7   0 171.907  13.882   2
  -3  -7   0 318.467  23.653   5
  -3  -7   0 259.829  25.530   4
   3   7   0 266.091  22.042   2
   3   7   0 337.497  23.946   1
   3   7   0 322.647  21.636   1
   3   7   0 226.826  44.248   4
  -4  -7   0 922.730  73.659   5
  -4  -7   0 821.661  87.415   4
  -4  -7   0 1059.56   65.87   1
   4   7   0 974.573  65.614   1
   4   7   0 907.932  68.563   2
  -5  -7   0 135.241  13.200   5
   5   7   0 154.649  16.283   1
   5   7   0 144.322  12.636   3
   5   7   0 140.016  11.891   1
   5   7   0 129.250  13.795   2
  -6  -7   0 324.641  29.033   4
  -6  -7   0 373.194  25.555   1
  -6  -7   0 347.112  27.695   5
   6   7   0 376.328  28.202   3
   6   7   0 328.659  25.536   1
  -7  -7   0 -0.7508  5.9968   5
  -7  -7   0 8.20233 6.56813   1
   7   7   0  5.2151 14.9974   3
   7   7   0  8.0900 11.3769   1
   7   7   0 12.2937 11.5047   2
   7   7   0 12.6515  2.9517   1
  -8  -7   0 50.0980 13.9442   5
  -8  -7   0 56.5196  6.1697   1
   8   7   0 57.0891  9.8428   1
   8   7   0 69.4472 23.7012   2
   8   7   0 73.0315  7.1787   3
   8   7   0 65.3727  5.8194   1
  -9  -7   0 94.0788 10.3765   1
  -9  -7   0 78.5029 15.8548   5
   9   7   0 85.1486  9.3457   1
   9   7   0 87.5938  7.6244   1
   9   7   0 89.7469  9.0133   2
   9   7   0 107.812  11.630   3
 -10  -7   0 135.094  21.516   5
 -10  -7   0 150.542  12.132   1
  10   7   0 167.571  14.095   2
  10   7   0 156.544  14.408   3
  10   7   0 150.050  12.261   1
 -11  -7   0 214.758  21.991   5
 -11  -7   0 210.173  16.327   1
  11   7   0 199.357  24.351   3
  11   7   0 252.353  18.911   2
  11   7   0 198.710  16.920   1
  12   7   0 -4.9705  4.9536   2
  12   7   0 -0.9677  2.3905   1
  12   7   0 -2.7495  4.7161   3
 -13  -7   0 7.76015 6.49292   5
  13   7   0 4.71439 4.20052   1
  13   7   0 16.0040  5.8592   2
  13   7   0 6.02729 3.77991   3
  14   7   0 12.9874  4.2072   1
  14   7   0 23.6271  6.1192   2
 -15  -7   0  1.2939 12.7478   5
  15   7   0 11.9698  6.3793   2
 -16  -7   0 -1.2412  9.5244   5
  16   7   0 -6.1768  7.5030   3
 -17  -7   0 53.2227  8.7264   5
  17   7   0 45.3124  7.9603   3
 -18  -7   0 18.5233  8.9189   5
  18   7   0 10.9357  6.9637   3
  19   7   0 42.6147  7.7862   3
 -23   8   0 6.84692 8.42993   4
 -22   8   0 -15.555   8.903   4
 -21   8   0 6.42285 7.01188   4
 -18   8   0 135.893  16.162   4
  17  -8   0 110.717   8.612   1
  16  -8   0 50.7275  4.8567   1
  15  -8   0 65.6620  6.1604   1
 -15   8   0 73.2008  9.4108   4
  14  -8   0 1.85394 2.37029   1
 -14   8   0 -9.1923  6.5229   4
 -13   8   0 32.3184  5.7306   1
 -13   8   0 40.9967  9.5231   4
  12  -8   0 697.715  45.873   1
 -12   8   0 666.990  45.562   1
 -12   8   0 580.264  53.071   4
  11  -8   0 116.357   9.943   1
  11  -8   0 119.873  14.117   1
 -11   8   0 126.096  10.013   1
 -11   8   0 117.450  16.861   4
  10  -8   0 11.2697  2.9096   1
  10  -8   0 15.3681  3.7065   1
 -10   8   0 18.4256 11.3195   4
 -10   8   0 12.2638  5.1402   1
   9  -8   0  0.9663 16.0693   1
   9  -8   0 5.46005 5.22598   1
  -9   8   0 6.90017 9.43737   4
  -9   8   0 -3.2171  2.7632   1
   8  -8   0 220.365  19.151   1
   8  -8   0 254.427  19.399   1
  -8   8   0 303.032  29.509   4
  -8   8   0 285.497  19.473   1
   7  -8   0 81.0036 17.0287   1
   7  -8   0 49.5282  6.6052   1
  -7   8   0 39.5288 12.2108   1
  -7   8   0 32.4593 25.0211   4
   6  -8   0 74.6326 11.6037   1
  -6   8   0 72.7272 15.8464   1
  -6   8   0 61.3949  5.5107   2
  -6   8   0 80.0663 19.0167   4
   5  -8   0 350.761  27.116   1
  -5   8   0 310.633  69.763   4
  -5   8   0 319.607  52.187   1
   4  -8   0 1492.33  106.89   1
   4  -8   0 1643.99  117.23   5
  -4   8   0 1510.98  122.04   4
   3  -8   0 8.49935 8.72475   1
   3  -8   0 -2.0558  7.0488   5
  -3   8   0 -4.3257 10.9066   4
  -3   8   0 0.83999 7.58672   1
   2  -8   0 29.5889  4.0505   1
   2  -8   0 35.4503  5.3556   5
  -2   8   0 29.4202  5.4357   4
  -2   8   0 30.8403  3.8439   1
  -1   8   0 102.982  20.920   4
  -1   8   0 134.312  12.862   1
  -1   8   0 81.8802 22.6956   2
   0  -8   0 1105.12   78.36   1
   0  -8   0 1115.86   84.55   5
   0  -8   0 1100.92   90.36   4
   0   8   0 1189.01   92.57   4
  -1  -8   0  0.5608 10.8241   1
  -1  -8   0 1.10762 2.55158   4
   1   8   0 -1.8254  6.4599   2
   1   8   0 -68.024  41.563   4
   1   8   0 -6.1648 10.4651   1
  -2  -8   0 1549.55  101.50   1
  -2  -8   0 1401.65  108.51   5
   2   8   0 1441.16  121.99   4
   2   8   0 1465.39  101.24   1
  -3  -8   0 116.283  43.053   4
   3   8   0 178.797  13.575   2
   3   8   0 128.009  15.449   1
  -4  -8   0 547.653  35.655   1
  -4  -8   0 475.217  46.136   5
  -4  -8   0 400.385  50.967   4
   4   8   0 510.225  39.801   4
   4   8   0 502.636  37.936   1
  -5  -8   0  0.8046 21.0265   5
   5   8   0 2.33638 5.31599   1
   5   8   0 9.16449 7.49296   3
   5   8   0 4.86775 6.49784   2
  -6  -8   0 783.466  54.104   1
   6   8   0 731.105  56.456   2
   6   8   0 787.073  59.621   3
   6   8   0 767.834  53.912   1
  -7  -8   0 197.743  15.933   1
  -7  -8   0 197.327  21.710   5
   7   8   0 200.074  16.972   1
   7   8   0 209.266  15.523   1
   7   8   0 202.111  16.614   2
   7   8   0 213.122  17.459   3
  -8  -8   0 90.4552 20.6558   5
  -8  -8   0 85.4917  8.3033   1
   8   8   0 101.248   8.107   1
  -9  -8   0 102.484  21.036   5
  -9  -8   0 105.910  11.328   1
   9   8   0 101.670  14.258   3
   9   8   0 103.934  12.299   2
   9   8   0 104.845  14.874   1
 -10  -8   0 710.164 143.861   1
  10   8   0 758.666 155.234   1
  10   8   0 747.953  72.273   3
  10   8   0 875.163  60.405   2
 -11  -8   0  5.4610 10.8832   5
  11   8   0 14.5224  5.3126   2
  11   8   0 12.9147  3.6474   1
  11   8   0 6.33447 5.19274   3
 -12  -8   0 36.0108  6.9476   5
  12   8   0 35.8174  4.7690   1
  12   8   0 51.3395  7.2019   2
  12   8   0 38.0881  8.3979   3
 -13  -8   0 41.9898  8.4809   5
  13   8   0 36.9861  6.3213   3
  13   8   0 28.0565  4.3456   1
  13   8   0 42.2471  7.0912   2
 -14  -8   0 15.7264  6.6109   5
  14   8   0 17.6694  5.7017   3
  14   8   0 26.1796  6.5370   2
  14   8   0 16.0390  3.0931   1
 -15  -8   0  5.0747 10.1152   5
  15   8   0 -0.8332  6.2036   2
  15   8   0 2.06567 5.56424   3
 -16  -8   0  4.8511 14.9592   5
  17   8   0 6.07215 5.91616   3
 -18  -8   0 -3.0999 10.5735   5
  18   8   0 2.19956 5.36695   3
 -19  -8   0 -3.8581  7.1677   5
 -22   9   0 -10.624   9.391   4
 -21   9   0 21.3127  7.0922   4
 -19   9   0 -5.7971  8.3101   4
  17  -9   0 140.100  10.900   1
  16  -9   0 85.5862  7.4672   1
  15  -9   0 68.4706  6.7665   1
 -15   9   0 76.1935 10.8109   4
  14  -9   0 263.415  20.835   1
 -14   9   0 302.529  25.988   4
  13  -9   0 82.2971 11.1548   1
 -13   9   0 102.663  17.847   4
 -13   9   0 81.7235  7.5042   1
  12  -9   0 7.44308 3.59569   1
 -12   9   0 2.57251 3.12839   1
 -12   9   0 -10.256  11.513   4
  11  -9   0 44.2806  5.1274   1
 -11   9   0 44.6046  4.9026   1
 -11   9   0 46.4770  8.3318   4
  10  -9   0 181.856  14.626   1
  10  -9   0 179.564  14.504   1
 -10   9   0 186.979  17.561   4
 -10   9   0 184.666  14.279   1
   9  -9   0 32.7608  5.8355   1
  -9   9   0 22.5831 10.3211   4
  -9   9   0 21.6816  4.0530   1
   8  -9   0 847.651  58.719   1
  -8   9   0 955.729  67.558   4
  -8   9   0 703.659  58.197   1
   7  -9   0 201.056  16.135   1
  -7   9   0 320.935  61.882   4
  -7   9   0 174.879  17.391   2
   6  -9   0 2179.50  148.06   1
  -6   9   0 1780.31  161.15   2
  -6   9   0 2178.35  145.28   1
  -6   9   0 2273.81  166.30   4
   5  -9   0 863.529  68.115   5
   5  -9   0 806.856  77.747   1
  -5   9   0 802.867  92.419   4
  -5   9   0 757.168  63.913   1
   4  -9   0 2892.05  219.51   5
   4  -9   0 2769.18  181.28   1
  -4   9   0 2253.24  221.48   4
   3  -9   0 589.929  41.237   5
  -3   9   0 557.443  38.094   1
  -3   9   0 456.078  43.194   4
   2  -9   0 209.082  18.373   1
   2  -9   0 194.132  21.067   5
  -2   9   0 219.079  20.133   4
   1  -9   0 18.8245 18.9389   5
  -1   9   0 19.4239 12.8756   1
  -1   9   0 30.0449  8.5765   4
  -1   9   0 15.2826  2.3549   2
   0  -9   0 2267.97  209.11   5
   0  -9   0 2626.41  169.54   1
   0   9   0 2483.44  169.18   1
   0   9   0 2423.81  193.66   4
  -1  -9   0 233.166  23.568   1
  -1  -9   0 205.218  86.177   5
   1   9   0 205.144  26.706   1
  -2  -9   0 47.8949  9.7540   5
  -2  -9   0 49.1430  6.0650   1
   2   9   0 46.3015  4.5432   2
   2   9   0 47.7476 55.6103   4
   2   9   0 35.5028  7.2110   1
  -3  -9   0 35.1460 19.2656   1
  -3  -9   0 11.4336 21.6150   5
   3   9   0 12.1346 20.2806   1
  -4  -9   0 291.647  22.199   1
  -4  -9   0 272.886  23.630   5
   4   9   0 300.108  23.841   4
   4   9   0 267.999  21.541   2
  -5  -9   0 33.5720 17.1502   5
  -5  -9   0 55.4853 16.7372   1
   5   9   0 60.8417 13.0413   1
   5   9   0 60.0660  7.8949   4
   5   9   0 60.7910  7.5479   3
  -6  -9   0 172.130  19.122   5
  -6  -9   0 215.543  17.350   1
   6   9   0 202.757  16.540   1
   6   9   0 175.424  16.032   2
   6   9   0 231.889  17.701   3
  -7  -9   0 101.216   9.756   1
   7   9   0 99.2493 10.6873   3
   7   9   0 126.505  10.137   1
  -8  -9   0 -3.6693  8.1725   5
  -8  -9   0 -10.208  14.311   1
   8   9   0 1.21289 4.82288   3
   8   9   0  1.4739 10.3244   2
   8   9   0 -2.5447 13.3194   1
  -9  -9   0 797.054  68.918   1
   9   9   0 898.461  66.846   3
 -10  -9   0 227.510  35.834   5
 -10  -9   0 270.812  21.151   1
  10   9   0 319.552  23.145   2
  10   9   0 277.539  24.084   3
  10   9   0 282.223  21.256   1
 -11  -9   0  8.1691 11.2439   5
  11   9   0 5.51201 7.10518   2
  11   9   0 5.08684 6.06450   3
  11   9   0 2.51793 3.35308   1
 -12  -9   0 88.1316 21.8862   5
  12   9   0 100.207  10.470   2
  12   9   0 80.7463 10.0777   3
  13   9   0 14.0995 19.1654   2
  13   9   0 15.0085  3.6763   1
 -14  -9   0 1.43634 4.91564   5
  14   9   0 0.02527 3.54602   3
 -15  -9   0 3.69606 9.92966   5
  15   9   0 15.5219  6.0775   3
  15   9   0 26.2402  7.3584   2
  16   9   0 30.9965  7.3090   3
 -17  -9   0  1.0142 13.1910   5
 -18  -9   0 -12.703   7.969   5
  18   9   0 7.45759 5.97457   3
 -22  10   0 -12.268   9.357   4
 -21  10   0 33.9872  9.1513   4
  17 -10   0 94.3087  8.3783   1
  16 -10   0 119.019  10.586   1
 -16  10   0 144.965  16.255   4
  15 -10   0 124.374  10.637   1
 -15  10   0 126.073  14.580   4
  14 -10   0 106.517   9.563   1
 -14  10   0 112.103  13.980   4
  13 -10   0  0.5355 14.4516   1
 -13  10   0 3.20484 6.24595   4
 -13  10   0 5.57895 2.92496   1
  12 -10   0 167.888  15.356   1
 -12  10   0 172.620  24.367   4
 -12  10   0 174.392  13.753   1
  11 -10   0 -0.1171  7.4633   1
 -11  10   0  1.0850 12.1299   4
 -11  10   0 -1.1178  3.1560   1
  10 -10   0 204.295  21.216   1
 -10  10   0 187.989  23.438   4
 -10  10   0 209.461  15.735   1
   9 -10   0 78.6887  8.6752   1
  -9  10   0 110.846   9.028   1
  -9  10   0 103.806  24.457   4
   8 -10   0 555.569  41.069   1
  -8  10   0 558.926  40.159   1
  -8  10   0 571.901  46.388   4
  -7  10   0 30.5407  3.3547   2
  -7  10   0 48.1174 36.6055   4
   6 -10   0 260.293  23.093   1
  -6  10   0 276.872  26.107   4
  -6  10   0 272.861  20.509   1
   5 -10   0 22.4452  5.6418   5
   5 -10   0 47.9741 21.7284   1
  -5  10   0 15.0075 20.3544   4
   4 -10   0 496.931  36.878   5
   4 -10   0 505.539  34.939   1
  -4  10   0 463.082  33.941   1
  -4  10   0 422.873  38.598   4
   3 -10   0 174.491  14.861   5
  -3  10   0 159.904  14.190   1
  -3  10   0 168.457  15.575   4
   2 -10   0 626.236  41.527   1
   2 -10   0 568.126  44.232   5
  -2  10   0 566.992  41.000   1
  -2  10   0 540.924  46.535   4
   1 -10   0 205.453  25.230   5
   1 -10   0 220.546  30.592   1
  -1  10   0 234.922  17.532   1
   0 -10   0 178.476  18.781   1
   0 -10   0 130.960  25.150   5
   0  10   0 156.562  24.202   4
   0  10   0 157.605  16.641   1
  -1 -10   0 99.3677 18.7517   1
  -1 -10   0 68.8044 19.0759   5
   1  10   0 81.9798 14.9870   1
  -2 -10   0 2034.29  133.57   1
   2  10   0 1905.56  133.17   1
   2  10   0 1846.43  152.65   4
  -3 -10   0 108.532  25.994   5
   3  10   0 67.0752  8.1970   2
   3  10   0 74.7999 12.3950   1
   3  10   0 83.4106 12.4100   4
  -4 -10   0 356.268  32.023   5
  -4 -10   0 395.040  29.881   1
   4  10   0 441.998  33.778   4
   4  10   0 419.426  29.689   1
   5  10   0 29.6254 15.1213   2
  -6 -10   0 1359.95   88.50   1
   6  10   0 1228.51   88.03   1
   6  10   0 1376.93   97.66   3
   6  10   0 1091.23   91.86   2
  -7 -10   0 274.483  56.448   5
  -7 -10   0 353.961  29.799   1
   7  10   0 350.849  29.561   3
   7  10   0 348.011  27.030   2
   7  10   0 363.155  26.617   1
  -8 -10   0 29.6828 20.3732   5
  -8 -10   0 43.3466  5.9542   1
   8  10   0 44.7213  6.2100   2
   8  10   0 29.0989  5.7878   1
   8  10   0 36.3676  6.4025   3
  -9 -10   0 -7.1585  9.5103   5
  -9 -10   0 -4.2801  3.8840   1
   9  10   0 -11.334   5.616   1
   9  10   0 -8.2771  6.6636   3
   9  10   0 -1.0389  6.3738   2
 -10 -10   0 69.9409 20.5474   5
  10  10   0 78.9455  8.5144   2
  10  10   0 81.3516  9.6444   3
 -11 -10   0 -7.6539  8.1306   5
  11  10   0 0.00000 4.56859   2
  11  10   0 5.27791 5.69663   3
  12  10   0 29.0242  4.9523   1
  12  10   0 36.6198 17.1987   3
 -13 -10   0 6.05221 5.51826   5
  13  10   0 15.5089  5.7723   2
  13  10   0 -0.5410  3.1641   1
 -14 -10   0 -6.6195 19.9447   5
  14  10   0 -4.6793  7.6034   2
  14  10   0 -5.8926 24.6778   1
  14  10   0  3.1463 15.8870   3
 -15 -10   0 77.2173 15.3225   5
  15  10   0 78.6983  9.7760   3
 -16 -10   0 0.72478 6.71309   5
  16  10   0 8.86983 6.22666   3
 -17 -10   0 -5.8719  8.3193   5
 -18 -10   0 -3.6302  9.1539   5
 -21  11   0 -5.7834  7.3761   4
 -18  11   0 1.60649 9.30956   4
  17 -11   0 107.462   9.489   1
  16 -11   0 95.8437  8.8825   1
  15 -11   0 476.446  36.214   1
 -15  11   0 527.222  42.969   4
  14 -11   0 273.593  19.338   1
 -14  11   0 218.153  22.376   4
  13 -11   0 15.1868 17.1271   1
 -13  11   0 28.5279  4.9066   1
  12 -11   0 81.0788  9.5808   1
 -12  11   0 63.6944 10.3346   4
 -12  11   0 81.5840  7.6338   1
  11 -11   0 138.110  15.130   1
 -11  11   0 119.398  16.146   4
 -11  11   0 113.032  10.283   1
  10 -11   0 82.4811 12.7356   1
 -10  11   0 81.1980  7.6200   1
 -10  11   0 56.3244 12.1044   4
   9 -11   0 11.6804 13.8206   1
  -9  11   0  2.7018 11.1865   4
  -9  11   0 6.15797 9.78658   1
   8 -11   0 378.872  29.136   1
  -8  11   0 396.245  28.698   1
  -8  11   0 392.713  35.324   4
   7 -11   0 34.3004 13.7523   1
  -7  11   0 80.6630 31.2951   4
  -7  11   0 29.0678  3.2537   2
   6 -11   0 1021.92   76.99   1
  -6  11   0 1204.34   88.53   4
  -6  11   0 1068.55   76.70   1
   5 -11   0  0.6978 24.1281   1
   5 -11   0  1.8934 15.1622   5
  -5  11   0 -8.1730  7.7969   1
  -5  11   0 -2.2358 34.6518   4
   4 -11   0 1612.06  107.88   1
  -4  11   0 1534.79  107.34   1
  -4  11   0 1499.71  122.63   4
   3 -11   0 226.452  26.256   5
   3 -11   0 175.706  16.427   1
  -3  11   0 222.559  16.512   1
   2 -11   0 608.741  48.017   5
   2 -11   0 702.289  45.252   1
  -2  11   0 543.214  50.520   4
  -2  11   0 643.067  44.618   1
   1 -11   0 20.8410  7.4911   5
   1 -11   0 36.4303 13.6387   1
  -1  11   0 71.4841 33.5087   4
  -1  11   0 16.8510  6.5725   2
   0 -11   0 332.455  28.250   5
   0  11   0 372.187  26.289   1
   0  11   0 352.197  30.522   4
  -1 -11   0 170.624  14.972   5
  -1 -11   0 127.059  13.949   1
   1  11   0 120.964  15.046   4
   1  11   0 134.971  10.831   2
  -2 -11   0 -13.796  16.923   5
  -2 -11   0 -1.5301  8.5605   1
   2  11   0 -13.488   6.420   1
   2  11   0 -1.5352  2.0578   2
   2  11   0 -7.6752 10.6237   4
  -3 -11   0 6.68850 5.14381   5
  -3 -11   0  8.4968 11.0193   1
   3  11   0 16.8002 26.6278   4
   3  11   0  4.1085 10.2108   1
  -4 -11   0 56.1945  8.9564   1
   4  11   0 44.4518  7.0690   1
   4  11   0 27.5389  8.4166   4
   4  11   0 37.4032  5.2843   2
  -5 -11   0 -1.7161 16.4096   5
  -5 -11   0 -4.6422  5.3995   1
   5  11   0 -1.7983 10.5390   1
   5  11   0 -7.7100 15.6593   4
   5  11   0 0.69024 3.70804   2
  -6 -11   0 2345.14  168.51   1
   6  11   0 2485.82  174.03   3
   6  11   0 1996.82  157.65   1
  -7 -11   0 173.528  72.579   5
  -7 -11   0 242.021  18.192   1
   7  11   0 232.246  21.019   3
   7  11   0 196.589  17.761   2
   7  11   0 220.172  17.742   1
  -8 -11   0  5.1844 11.5756   5
  -8 -11   0 5.37366 4.60688   1
   8  11   0  6.2708 13.2902   3
   8  11   0 7.86568 8.29758   1
  -9 -11   0  0.3443 14.1779   5
  -9 -11   0 -1.7281  4.0012   1
   9  11   0 -0.4463 12.4150   3
   9  11   0  2.9398 12.4187   2
   9  11   0 4.13939 6.56797   1
 -10 -11   0 15.0070  7.3748   5
  10  11   0 -4.1028  4.0326   1
  10  11   0 -2.2558  4.5424   2
  10  11   0 -0.9394  3.7690   3
 -11 -11   0 4.77997 6.97984   5
  11  11   0 -2.0368  4.6272   2
  11  11   0 -2.7333  5.0202   3
  11  11   0 3.07512 3.84775   1
 -12 -11   0 2.41145 5.90927   5
  12  11   0 -6.3917  6.0550   1
  12  11   0 -8.6724  5.4457   2
 -13 -11   0 -11.995  10.118   5
  13  11   0 -4.0895  5.1873   1
  13  11   0 -0.6643  4.9470   2
  13  11   0 -3.7162  4.1653   3
 -14 -11   0 52.2799 12.4340   5
  14  11   0 62.1930  9.3226   3
  14  11   0 56.7690  7.3220   1
  14  11   0 74.5351  9.1816   2
  16  11   0 24.5165  7.3437   3
 -17 -11   0 -13.996   7.530   5
  17  11   0 -8.7657  6.4481   3
 -22  12   0 10.0852  9.9981   4
 -20  12   0 3.59203 9.64631   4
 -19  12   0 -0.9811  8.7522   4
  18 -12   0 29.1607  5.9716   1
  17 -12   0 27.5061  4.7435   1
 -17  12   0 39.3088  8.0139   4
 -16  12   0 401.306  37.363   4
  15 -12   0 233.840  20.528   1
 -15  12   0 301.464  25.294   4
  14 -12   0 12.9962  4.7502   1
  13 -12   0 39.6413 12.9331   1
 -13  12   0 39.3497 13.2110   4
 -13  12   0 59.9565  6.5882   1
  12 -12   0 68.5488  8.5555   1
 -12  12   0 85.7643  8.1638   1
 -12  12   0 81.1257 19.5389   4
  11 -12   0 -2.4307  6.9885   1
 -11  12   0 10.1071  5.3370   4
 -11  12   0 10.5564  5.4810   1
  10 -12   0 67.2990 16.7351   1
 -10  12   0 53.1892 19.2630   4
 -10  12   0 45.7254  5.7056   1
   9 -12   0 104.670  19.633   1
  -9  12   0 131.010  15.496   1
  -9  12   0 124.399  14.099   4
   8 -12   0 551.426  42.492   1
  -8  12   0 617.857  42.208   1
   7 -12   0 37.9635 16.6578   1
  -7  12   0 44.2514 16.0743   1
   6 -12   0 178.319  14.452   1
  -6  12   0 156.245  14.287   2
  -6  12   0 171.796  21.297   4
   5 -12   0 267.474  38.214   5
   5 -12   0 287.413  22.372   1
  -5  12   0 272.006  28.839   4
  -5  12   0 276.597  21.355   1
   4 -12   0 5524.10  384.78   1
  -4  12   0 5271.15  382.73   1
  -4  12   0 5985.28  437.83   4
   3 -12   0 132.507  21.696   5
   3 -12   0 138.252  17.304   1
  -3  12   0 99.8323 26.0315   1
  -3  12   0 172.204  26.854   4
   2 -12   0 3165.71  219.56   1
  -2  12   0 3076.45  219.07   1
  -2  12   0 3320.87  250.60   4
   1 -12   0 106.701 153.820   5
  -1  12   0 138.856  12.404   1
   0 -12   0 66.6066  8.1162   1
   0 -12   0 61.8313 21.7200   5
   0  12   0 52.4129  9.8606   4
   0  12   0 44.1053  8.4933   1
  -1 -12   0 56.7142 20.8880   5
   1  12   0 37.7005  6.0860   1
   1  12   0 35.9061  6.4447   2
   1  12   0 99.1969 34.3551   4
  -2 -12   0  7.4723 21.0939   5
  -2 -12   0 19.3258 17.9919   1
   2  12   0 16.1043  2.7345   2
   2  12   0 13.0925  6.2781   1
   2  12   0  4.9889 12.8237   4
  -3 -12   0 86.4695 20.3450   5
  -3 -12   0 72.8080 13.4768   1
   3  12   0 56.1779  7.2005   2
   3  12   0 56.0338  8.9355   1
  -4 -12   0 -17.415  27.432   5
  -4 -12   0 10.1691  8.8413   1
   4  12   0 -0.5300  4.9182   1
   4  12   0 -27.147  15.017   4
  -5 -12   0 116.976  11.758   1
   5  12   0 126.370  11.666   1
   5  12   0 126.704  13.216   4
   6  12   0 283.222  25.267   2
   6  12   0 368.569  25.880   1
   6  12   0 340.391  28.711   3
  -7 -12   0 41.4949  6.3442   1
   7  12   0 40.9683  8.7846   1
   7  12   0 39.4623  8.8378   3
   7  12   0 34.0927  7.0690   2
  -8 -12   0 258.168  20.091   1
   8  12   0 245.428  23.701   3
   8  12   0 224.468  24.212   1
  -9 -12   0 149.257  12.505   1
  -9 -12   0 113.505  26.161   5
   9  12   0 124.423  11.956   2
   9  12   0 111.085  14.144   3
   9  12   0 137.532  12.243   1
 -10 -12   0 13.4521  7.4393   5
  10  12   0 8.31400 4.50587   2
  10  12   0 -3.9403  7.5352   1
  10  12   0 1.98055 7.67524   3
 -11 -12   0 -11.654  10.802   5
  11  12   0 -3.9195  4.2468   1
  11  12   0 -9.6016  5.9445   3
  11  12   0 2.33888 4.43795   2
  12  12   0 39.3669  8.7355   3
  12  12   0 52.4944  6.6208   1
  12  12   0 66.3308  8.1371   2
 -13 -12   0 -0.4659  9.3420   5
  13  12   0 11.8287  5.6190   2
  13  12   0 7.88632 6.48850   3
 -14 -12   0 26.4616  8.9705   5
  14  12   0 11.0737  6.4487   3
  14  12   0 21.6650  4.5382   1
  15  12   0 5.25931 5.72439   3
  16  12   0 28.7997  7.7954   3
 -19  13   0 0.70757 7.81855   4
  18 -13   0 38.6371  6.1961   1
  16 -13   0 19.1139  4.9181   1
  15 -13   0 2.29832 6.34160   1
  14 -13   0 30.3783  6.1198   1
 -14  13   0 20.3321  8.7325   4
  13 -13   0 0.50083 7.08839   1
 -13  13   0 -1.2319  5.2939   1
  12 -13   0 129.513  11.843   1
 -12  13   0 117.684  10.676   1
 -12  13   0 106.368  13.151   4
  11 -13   0 185.204  16.926   1
 -11  13   0 217.145  16.920   1
 -11  13   0 221.846  20.181   4
  10 -13   0 39.0571 12.6027   1
 -10  13   0 40.8382  8.4666   4
 -10  13   0 46.0338  6.1195   1
   9 -13   0 59.1204 12.3522   1
  -9  13   0 91.9253 11.8890   4
  -9  13   0 78.0154  8.4954   1
   8 -13   0 2042.49  151.23   1
  -8  13   0 2123.89  150.88   1
  -8  13   0 2379.88  172.97   4
  -7  13   0 57.9248 28.7796   2
  -7  13   0 155.784  54.189   4
  -7  13   0 79.8740  8.8994   1
   6 -13   0 1425.02   91.02   1
  -6  13   0 1090.69   89.75   1
  -6  13   0 1356.43  105.29   4
   5 -13   0 140.216  19.247   5
   5 -13   0 121.456  19.879   1
  -5  13   0 132.341  39.725   4
  -5  13   0 164.928  20.149   1
   4 -13   0 26.3202 33.4253   5
   4 -13   0 31.1577 22.9566   1
  -4  13   0 26.3193 15.0443   4
  -4  13   0 44.7416 13.8011   1
   3 -13   0 37.1449 12.1362   1
   3 -13   0 13.6332 24.7809   5
  -3  13   0 14.1337  8.9820   2
  -3  13   0 19.6508 23.9799   4
  -3  13   0 26.9824  5.1318   1
   2 -13   0 145.912  35.624   5
  -2  13   0 85.3932 14.5387   4
  -2  13   0 127.113  13.322   1
   1 -13   0 -1.2936 16.2689   5
   1 -13   0 5.98182 5.67115   1
  -1  13   0 -1.7374  4.1195   1
  -1  13   0 2.44663 2.80853   2
   0 -13   0  1.0347 10.6449   5
   0  13   0 11.5845  2.7009   2
   0  13   0 22.2776  9.0835   1
  -1 -13   0 70.8988  9.2517   1
  -1 -13   0 65.6842 19.8374   5
   1  13   0 67.4897  9.1227   1
  -2 -13   0 676.468  48.438   1
   2  13   0 649.230  47.731   1
  -3 -13   0 21.2596 30.4337   5
  -3 -13   0 16.2217 12.4745   1
   3  13   0 36.6341  8.9196   1
  -4 -13   0 -22.836  12.136   5
  -4 -13   0 6.72481 5.28385   1
   4  13   0 0.79356 4.29395   1
   4  13   0 -3.2275  2.4553   2
   4  13   0 -6.9212 29.8641   4
  -5 -13   0 77.4779 16.6932   5
   5  13   0 73.6291  7.1812   2
   5  13   0 73.7920  8.5686   1
  -6 -13   0 857.914  56.553   1
   6  13   0 795.135  55.991   1
   6  13   0 662.048  57.283   2
   6  13   0 804.299  62.286   3
  -7 -13   0 28.4466  5.1452   1
   7  13   0 30.4270  5.9895   1
   7  13   0 26.3463  4.7105   2
   7  13   0 24.8982  7.2108   3
  -8 -13   0 144.820  73.571   5
  -8 -13   0 132.747  33.816   1
   8  13   0 113.848  52.505   2
   8  13   0 137.341  28.378   3
   8  13   0 155.105  15.582   1
  -9 -13   0 14.1481 11.7849   5
   9  13   0 15.1497  5.6554   1
   9  13   0 16.8087  5.3049   3
 -10 -13   0 -5.8875 25.0840   5
  10  13   0 2.63152 5.43047   3
  10  13   0 2.84001 4.02764   2
  10  13   0 10.6105  5.1080   1
 -11 -13   0 49.2327 12.8616   5
  11  13   0 42.9680  8.2963   3
  11  13   0 45.9416  6.5809   2
 -12 -13   0 89.6433 13.3219   5
  12  13   0 67.7585  8.2150   1
  12  13   0 80.1641  9.0043   2
  12  13   0 71.6486 10.5408   3
  13  13   0 35.9613  6.4901   2
  13  13   0 40.9947  6.0365   1
 -14 -13   0 2.81919 6.96115   5
  14  13   0 6.31970 3.86645   1
  14  13   0 1.56856 5.11372   3
 -15 -13   0 92.1714 14.1003   5
  15  13   0 75.1586 10.8872   3
 -21  14   0 7.85541 8.24080   4
  19 -14   0 -6.7800  3.5660   1
  18 -14   0 124.593  11.715   1
  17 -14   0 3.56244 4.39994   1
  16 -14   0 34.6963  6.4945   1
  15 -14   0 0.35251 4.35888   1
 -15  14   0 16.9538  6.2016   4
  14 -14   0 26.7517  5.8412   1
  12 -14   0 66.4007  8.9945   1
 -12  14   0 68.4470  7.8606   1
 -12  14   0 68.7624 10.1302   4
  11 -14   0 2.77018 8.30265   1
 -11  14   0 -5.0474  8.2181   4
 -11  14   0 2.84150 3.72975   1
  10 -14   0 -19.843  12.685   1
 -10  14   0 -5.2330 13.1300   4
 -10  14   0 0.54529 5.85748   1
   9 -14   0 46.2441  7.2654   1
  -9  14   0 52.7735  7.0969   1
  -9  14   0 57.1637 14.8449   4
   8 -14   0 49.8421 20.6788   1
  -8  14   0 -16.605  26.850   4
  -8  14   0 -3.0771  7.5818   1
   7 -14   0 77.2316 16.7351   1
  -7  14   0 68.6656 11.8014   1
   6 -14   0 740.491  55.555   1
  -6  14   0 798.835  65.527   4
   5 -14   0 -7.6674 11.5119   1
  -5  14   0 -9.8828  8.3753   4
  -5  14   0 -6.1069  5.3781   1
   4 -14   0 1635.08  110.88   1
   4 -14   0 1540.40  122.38   5
  -4  14   0 1434.95  132.87   4
  -4  14   0 1697.92  110.37   1
   3 -14   0  1.1420 14.3135   1
   3 -14   0  4.3461 43.8305   5
  -3  14   0 -13.928  14.556   4
  -3  14   0 -0.0074  2.7256   2
   2 -14   0  8.8177 20.6845   5
  -2  14   0 23.3329  8.5470   1
  -2  14   0 3.64385 3.56770   2
  -2  14   0 -3.0621 12.2544   4
   1 -14   0 148.892  13.665   1
  -1  14   0 143.645  20.481   4
  -1  14   0 127.625  12.591   1
   0 -14   0 69.6958 37.3630   5
   0  14   0 77.5006 10.9901   1
  -1 -14   0 318.315  31.095   5
  -1 -14   0 409.954  29.041   1
   1  14   0 338.905  41.699   4
   1  14   0 390.960  28.170   1
  -2 -14   0 1559.95  113.39   1
   2  14   0 1662.48  131.44   4
   2  14   0 1632.45  113.00   1
  -3 -14   0 2.24222 5.81192   1
  -3 -14   0 -1.2667 73.4300   5
   3  14   0 0.83888 2.08687   2
   3  14   0 -9.6387  5.7772   1
  -4 -14   0  9.4588 27.8098   5
  -4 -14   0 49.8446 11.4231   1
   4  14   0 46.6951  7.5868   1
   4  14   0 39.2249  4.7689   2
  -5 -14   0 275.920  27.944   5
   5  14   0 310.900  23.697   1
   5  14   0 308.517  26.180   4
  -6 -14   0 258.204  21.823   1
   6  14   0 306.054  24.725   3
   6  14   0 239.620  20.759   2
   6  14   0 262.278  21.396   1
  -7 -14   0 252.040  23.884   5
   7  14   0 251.268  20.353   2
   7  14   0 261.403  23.324   3
  -8 -14   0 40.9154 24.1053   1
   8  14   0 50.3429 17.0555   3
   8  14   0 77.6341  9.6061   1
   8  14   0 64.6295 17.9444   2
  -9 -14   0 -15.930  10.626   5
   9  14   0 -1.4109  4.7293   1
   9  14   0 2.01629 5.71898   3
 -10 -14   0 10.6213 10.1704   5
  10  14   0 8.52472 4.77981   2
  10  14   0 12.0032  4.9819   3
 -11 -14   0 -3.1981  9.0088   5
  11  14   0 -2.7988  4.2002   2
  11  14   0 1.70430 4.33217   1
  11  14   0 -6.3977  5.5507   3
 -12 -14   0 -4.6216  9.7319   5
  12  14   0 -4.6573  4.6389   1
  12  14   0 9.62560 5.04997   2
  12  14   0 -8.6683  5.5500   3
  13  14   0 -1.9582  5.2017   3
  13  14   0 7.04468 4.28579   1
 -14 -14   0 -8.5223 12.7703   5
  14  14   0 -0.0711  5.6426   3
  14  14   0 2.41743 5.31033   1
 -20  15   0 -6.1928  8.6020   4
  19 -15   0 62.7045  7.3985   1
  16 -15   0 58.4301  7.9123   1
 -16  15   0 42.2067  8.5712   4
  15 -15   0 76.1146  9.4391   1
  14 -15   0 53.7344  8.6410   1
  13 -15   0 136.865  13.603   1
 -13  15   0 140.491  12.633   1
  12 -15   0 7.01981 5.08864   1
 -12  15   0 -1.8894  8.4226   4
 -12  15   0 8.20016 4.42717   1
  11 -15   0 90.4784 10.7020   1
 -11  15   0 103.141  10.084   1
 -11  15   0 89.1918 11.9617   4
 -10  15   0 68.4327 14.2894   4
 -10  15   0 63.6255  7.9527   1
  -9  15   0 9.84627 8.25055   4
  -9  15   0 11.2772  4.5927   1
   8 -15   0 38.5369  9.2476   1
  -8  15   0 30.8118  6.3874   1
  -8  15   0 12.9185 11.2088   4
   7 -15   0 5.68144 6.61958   1
  -7  15   0 10.2085 11.7278   4
  -7  15   0 13.7521  5.1363   1
   6 -15   0 66.3835 11.5692   1
  -6  15   0 56.4559  9.2406   1
  -6  15   0 43.0103 10.3682   4
   5 -15   0 -8.1970 19.4100   5
   5 -15   0 -8.2084 10.2442   1
  -5  15   0 -5.3533  4.0011   1
   4 -15   0 231.328  21.461   1
   4 -15   0 261.571  24.964   5
  -4  15   0 304.071  21.523   1
   3 -15   0 87.7477 10.8873   1
   3 -15   0 61.6607 24.3327   5
  -3  15   0 80.5156 14.7095   1
   2 -15   0 49.1056 15.5795   5
   2 -15   0 36.1817 11.9746   1
  -2  15   0 31.0896  9.5139   1
   1 -15   0 14.9981 19.6720   5
  -1  15   0 9.02809 2.31751   2
   0 -15   0 599.265  42.937   1
   0  15   0 561.538  41.969   1
   0  15   0 556.872  54.436   4
  -1 -15   0 402.203  32.872   5
  -1 -15   0 332.727  29.797   1
   1  15   0 441.608  30.124   1
  -2 -15   0 44.2391  9.4358   5
   2  15   0 26.9396  3.4493   2
  -3 -15   0  5.5367 26.7353   5
   3  15   0 3.84054 2.09087   2
   3  15   0 -2.9782  3.8202   1
  -4 -15   0 305.822  27.305   1
   4  15   0 390.766  27.512   1
  -5 -15   0 9.54406 5.73988   1
  -5 -15   0 -5.0613  7.1887   5
   5  15   0 1.94932 5.65633   1
  -6 -15   0 15.6130 37.9885   5
   6  15   0 38.1099 20.2841   1
   6  15   0 13.1833  3.8720   2
   6  15   0 18.6627 65.8321   3
  -7 -15   0 56.1459  8.7022   1
  -7 -15   0 54.5694 50.3056   5
   7  15   0 44.6434  6.6741   2
   7  15   0 47.3738  6.9194   1
   7  15   0 42.3786 10.1160   3
  -8 -15   0 10.6815 14.3714   5
   8  15   0 -9.6869  7.0855   3
   8  15   0 -3.5640  5.6002   1
  -9 -15   0 -0.9927  9.9160   5
   9  15   0 13.0521  4.3900   2
   9  15   0 15.3305  7.1563   3
  10  15   0 6.05685 4.70429   1
  10  15   0 5.12819 4.25273   2
  11  15   0 43.7105  6.9149   2
  11  15   0 37.2134  6.4325   1
  12  15   0 4.38515 5.63693   3
  12  15   0 -6.2352  7.5465   1
 -13 -15   0 76.1304 12.2494   5
  13  15   0 55.6506 10.0753   3
  13  15   0 81.1641  8.7812   1
  19 -16   0 10.3273  4.6100   1
  18 -16   0 168.962  15.620   1
 -18  16   0 174.287  18.365   4
  17 -16   0 32.9369  6.6801   1
 -17  16   0 32.2911  7.8203   4
  16 -16   0 2.15326 5.86183   1
  15 -16   0 52.0220  8.2641   1
  14 -16   0 -2.8716  6.9275   1
  13 -16   0 234.758  21.869   1
 -13  16   0 288.566  21.410   1
  12 -16   0 10.1932  7.7143   1
 -12  16   0 4.92868 4.80154   1
  11 -16   0 2.09750 6.05069   1
 -11  16   0 -4.2301  4.8351   1
 -11  16   0 -4.0879  6.8625   4
  10 -16   0 250.950  19.749   1
 -10  16   0 200.882  20.650   4
 -10  16   0 198.911  17.778   1
   9 -16   0 10.7720  7.2735   1
  -9  16   0 10.1700  9.3045   4
   8 -16   0 23.5515 15.4973   1
  -8  16   0  8.2121 12.6009   4
  -8  16   0 6.26855 6.35066   1
   7 -16   0 -5.2977  7.1676   1
  -7  16   0 -2.2619  5.1596   1
  -7  16   0 6.82552 6.96972   4
   6 -16   0 313.943  24.578   1
  -6  16   0 305.373  23.451   1
  -6  16   0 259.097  28.248   4
   5 -16   0 -18.938  10.538   1
   5 -16   0 -0.5056 25.2367   5
  -5  16   0 2.00866 5.31329   1
  -4  16   0 65.5815 11.5187   4
  -4  16   0 82.9167  8.5703   1
   3 -16   0 38.2332  7.8599   1
   3 -16   0 28.5267  8.5875   5
  -3  16   0 42.6205  7.0290   1
   2 -16   0 -6.5147  6.8008   1
   2 -16   0 -5.6110  8.2178   5
  -2  16   0 -23.054  13.226   4
  -2  16   0 -2.1937  4.1113   1
   1 -16   0 -12.809  10.337   5
   1 -16   0 2.39411 6.59373   1
  -1  16   0 -17.242  30.020   4
  -1  16   0 6.76334 5.67313   1
   0 -16   0 95.2247 11.0693   1
   0 -16   0 112.726  12.979   5
  -1 -16   0 78.6618 22.6198   5
   1  16   0 58.4607  9.9859   1
   1  16   0 68.3595 13.5734   4
  -2 -16   0 74.3489 13.7046   5
   2  16   0 102.151  10.453   1
   2  16   0 76.5885 12.4617   4
  -3 -16   0 10.7411 24.6068   5
  -3 -16   0 9.62314 8.35260   1
   3  16   0 5.68217 5.90382   4
   3  16   0 0.56557 7.90440   1
  -5 -16   0 -8.7461 15.6375   5
  -5 -16   0 2.88308 8.34983   1
   6  16   0 273.369  25.278   3
  -7 -16   0 91.0851 11.2529   1
   7  16   0 96.9246 10.8059   1
  -8 -16   0 2.55610 7.27589   5
   8  16   0 26.2015  5.6400   1
  -9 -16   0 7.87661 9.64889   5
   9  16   0 18.0285  7.6050   3
  10  16   0 23.2425 26.2143   3
  10  16   0 27.5001  7.2357   1
  11  16   0 28.1889  6.4001   1
  12  16   0 28.5404  6.1754   1
  12  16   0 16.7430  7.1997   3
 -19  17   0 126.793  15.402   4
  18 -17   0 11.0566  5.7331   1
 -18  17   0 -10.788   8.198   4
  17 -17   0 7.37441 5.85296   1
 -17  17   0 0.40463 7.79941   4
  16 -17   0 190.752  17.602   1
  15 -17   0 -1.6553  6.3449   1
 -15  17   0 -5.6915  5.3938   4
  14 -17   0 41.7491 13.0969   1
  12 -17   0 11.1212 13.6350   1
 -12  17   0 5.55618 8.01822   4
  11 -17   0  1.7635 13.3539   1
 -11  17   0 -5.1243  3.9626   1
 -11  17   0  2.3509 15.0052   4
  10 -17   0 348.632  33.465   1
 -10  17   0 376.279  28.390   1
   9 -17   0 163.331  17.146   1
  -9  17   0 176.906  15.391   1
   8 -17   0 659.838  52.075   1
  -8  17   0 764.020  59.138   4
  -8  17   0 690.606  51.253   1
   7 -17   0  6.6943 14.2919   1
   6 -17   0 734.119  55.473   1
  -6  17   0 817.381  62.939   4
  -6  17   0 710.746  54.445   1
   5 -17   0 65.7509  9.9051   1
  -5  17   0 56.4294  8.1758   1
  -5  17   0 52.9234 10.5018   4
   4 -17   0 -17.099   8.630   5
   4 -17   0 -10.108   9.624   1
  -4  17   0 5.66222 4.37272   1
  -4  17   0 -0.4738 16.4420   4
   3 -17   0 65.7350  9.6083   1
  -3  17   0 70.0718  9.0168   1
  -3  17   0 49.7738 10.5570   4
   2 -17   0 78.1288 11.5048   1
  -2  17   0 63.7999 12.7278   4
  -2  17   0 88.1875  9.8994   1
   1 -17   0 4.82862 7.01025   1
   1 -17   0 -2.3478 13.8541   5
  -1  17   0 8.80387 5.56318   1
  -1  17   0 12.4730  7.9180   4
   0 -17   0 146.815  16.025   1
   0  17   0 147.234  17.256   4
  -1 -17   0 186.910  21.654   1
   1  17   0 154.892  19.358   4
   1  17   0 174.877  15.790   1
  -2 -17   0 270.921  28.672   1
   2  17   0 307.069  23.994   1
  -3 -17   0 372.126  28.902   1
   3  17   0 327.612  27.536   1
  -4 -17   0 85.6032 12.7123   1
   4  17   0 107.229  12.031   1
  -5 -17   0 81.3845 11.6786   1
   5  17   0 98.2582 11.3061   1
  -6 -17   0 114.815  16.524   1
   6  17   0 89.0366 14.4477   3
   6  17   0 130.020  12.714   1
   7  17   0 4.85528 6.90800   3
   7  17   0 7.86177 6.05233   1
  -9 -17   0 6.06679 7.87805   5
   9  17   0 16.4234  6.5907   3
   9  17   0 6.33887 5.17855   1
 -10 -17   0 3.03830 7.33272   5
  10  17   0 3.12656 5.05056   3
  10  17   0 6.55930 5.89117   1
 -11 -17   0 -0.0561  7.0947   5
  11  17   0 -0.3444  5.3976   3
  18 -18   0 5.26524 6.27507   1
  17 -18   0 28.1638  7.5137   1
  16 -18   0 -8.9779  7.0872   1
 -16  18   0 5.26285 6.28450   4
  15 -18   0 -1.5963  6.6289   1
 -15  18   0 -2.8500  7.5238   4
  14 -18   0 -2.9576  6.3639   1
  13 -18   0 54.7118 10.1463   1
  12 -18   0 80.3615 12.1148   1
 -12  18   0 113.119  11.351   1
  11 -18   0 -5.4711  9.6601   1
 -11  18   0 -4.4216  7.9706   4
  10 -18   0 8.27435 9.50773   1
 -10  18   0 12.6070  6.1896   1
   9 -18   0  7.2062 12.9735   1
  -9  18   0 -1.7330 12.4454   4
   8 -18   0 274.711  24.741   1
  -8  18   0 329.649  30.093   4
  -8  18   0 303.307  24.271   1
   7 -18   0 34.0473  7.5208   1
  -7  18   0 46.4374 10.0239   4
   6 -18   0 16.7954  7.3381   1
  -6  18   0 4.30454 5.98326   1
  -6  18   0  0.2215 11.4305   4
   5 -18   0 183.266  17.051   1
   5 -18   0 142.219  33.517   5
  -5  18   0 121.843  23.017   4
  -5  18   0 165.833  15.005   1
   4 -18   0 978.603  70.245   1
  -4  18   0 949.797  69.044   1
   3 -18   0  3.9083 34.9751   5
   3 -18   0 5.43612 6.77142   1
  -3  18   0 1.17370 4.99979   1
  -3  18   0 -2.3258 14.4398   4
   2 -18   0 70.8802 10.9922   1
  -2  18   0 83.2965 10.0927   1
   1 -18   0  8.7194 21.0481   5
  -1  18   0 10.5886  5.8759   1
   0 -18   0 297.348  27.126   1
   0  18   0 324.789  26.225   1
   0  18   0 354.793  33.300   4
   1  18   0 123.456  13.088   1
  -2 -18   0 246.587  25.328   1
   2  18   0 276.901  22.363   1
  -3 -18   0 230.730  20.730   1
  -4 -18   0 48.3386  9.2412   1
  -5 -18   0 13.9670 15.8853   5
   5  18   0 29.5852  7.1060   1
   6  18   0 109.998  13.953   3
   7  18   0 100.018  11.955   1
  -8 -18   0 -0.0303 15.6989   5
   8  18   0 11.3904  6.7629   1
   8  18   0 -1.2418  5.3307   3
  -9 -18   0 6.74134 8.82856   5
   9  18   0 7.74959 6.92546   3
  17 -19   0 13.0784  6.8741   1
  16 -19   0 77.4137 11.0498   1
  15 -19   0 6.39319 7.08360   1
 -15  19   0 7.24902 8.09628   4
  14 -19   0 4.79311 7.85426   1
 -14  19   0 8.08541 8.33864   4
  13 -19   0 9.99732 8.77918   1
 -13  19   0 -3.2697  6.5453   4
  12 -19   0 159.609  16.425   1
 -12  19   0 146.792  14.693   1
  11 -19   0 -0.0039  7.5805   1
 -11  19   0 -0.7930  5.4486   1
 -11  19   0 -0.4795  7.8732   4
   9 -19   0 9.30896 7.69590   1
  -9  19   0 15.2109  7.9432   4
  -8  19   0 76.7877  8.9869   1
   7 -19   0 2.09011 7.31194   1
  -7  19   0 -16.297  10.301   4
   6 -19   0 53.2948  8.5917   1
  -6  19   0 51.9470  8.3734   1
   5 -19   0 28.6028  8.4680   1
  -5  19   0 35.9675  7.3475   1
   4 -19   0 -11.786  16.318   5
   4 -19   0 0.20744 8.04353   1
  -4  19   0 13.0240  6.4257   1
  -4  19   0 32.1578 10.5296   4
  -3  19   0 46.6988  7.3391   1
  -3  19   0 43.6367 11.0881   4
   2 -19   0 -6.0851  8.2150   1
  -2  19   0 -3.9284  6.2780   1
   0 -19   0 3.05012 9.55827   1
   0  19   0 20.4824  7.5458   1
  -1 -19   0 34.6793  9.5193   1
   1  19   0 50.0034  8.4192   1
  -2 -19   0 60.6965 10.5008   1
   2  19   0 52.6371  8.3875   1
  -3 -19   0 -1.4393  6.9962   1
  -3 -19   0 10.0618 12.8874   5
   3  19   0 -6.8043  5.1191   1
  -5 -19   0 25.8546 10.8526   5
  -5 -19   0 0.30338 6.55628   1
   5  19   0 -4.3304  4.7694   1
   5  19   0 1.09808 6.71792   3
   6  19   0 44.6508  9.1714   3
  -8 -19   0  8.2640 11.5203   5
 -16  20   0 7.11595 8.17641   4
  15 -20   0 42.9433  8.3249   1
 -15  20   0 46.6339  9.2202   4
  14 -20   0 27.2663  9.3817   1
  12 -20   0 100.595  14.040   1
 -12  20   0 128.456  12.897   1
  11 -20   0 18.3676  7.0111   1
 -11  20   0 8.27320 6.00206   1
 -11  20   0 -6.0893  8.0621   4
 -10  20   0 38.2828  6.6941   1
   9 -20   0 9.22087 7.96189   1
  -9  20   0 7.39020 5.87173   1
   8 -20   0 40.7810  9.7441   1
  -8  20   0 31.7549  7.2872   1
   7 -20   0 20.0392  8.9901   1
  -7  20   0  6.2200 10.7675   4
   6 -20   0 43.6523  9.5241   1
  -6  20   0 27.4339  5.8024   1
  -6  20   0 12.8179  8.6278   4
   5 -20   0 4.81456 8.44174   5
   5 -20   0 10.8676  6.8246   1
  -5  20   0  5.6671 10.1403   4
  -5  20   0 12.3252  6.2594   1
  -4  20   0  2.0932 12.2389   4
  -4  20   0 5.38211 6.60224   1
   3 -20   0 37.6271  9.8289   1
  -3  20   0 38.9773  7.8036   1
  -2  20   0 100.665  11.904   1
   1 -20   0 -18.175  11.528   5
   1 -20   0 -7.8565  8.5161   1
  -1  20   0 6.13782 6.26474   1
   0 -20   0 10.1810  8.2431   1
   0  20   0 24.1354  7.2020   1
  -1 -20   0 59.9184 10.1578   1
   1  20   0 77.5463 10.0228   1
   6  20   0 175.350  18.847   3
  14 -21   0 5.46455 6.29826   1
 -14  21   0 2.19898 7.84124   4
  13 -21   0 -5.1014  9.5120   1
  12 -21   0 21.5703  9.4008   1
 -12  21   0 10.1871  8.8642   4
  11 -21   0 -13.214   9.471   1
 -11  21   0 0.43069 4.43122   1
  10 -21   0 10.6369  8.7860   1
 -10  21   0 2.37708 6.07695   1
 -10  21   0 7.73704 9.02179   4
  -9  21   0 28.4969  8.0577   1
   8 -21   0 10.1151  8.3352   1
  -8  21   0 6.46653 6.69606   1
  -8  21   0 -18.418  10.118   4
  -6  21   0 66.1591 14.3320   4
  -5  21   0 31.1615  6.5792   1
  -4  21   0 141.809  21.117   4
   3 -21   0 1.25753 8.30691   5
   2 -21   0 14.5960  6.6033   1
   2 -21   0 -9.2216  7.4173   5
   1 -21   0 5.33909 7.83061   5
  -1 -21   0 -14.668  14.446   5
  -3 -21   0  1.0512 11.5869   5
  -4 -21   0  1.5067 18.6612   5
  -9  22   0 10.7955 10.3621   4
  -8  22   0 -1.0503  8.6538   4
  -7  22   0 12.9883 12.3550   4
  -6  22   0  4.0741 11.5120   4
   4 -22   0 7.91281 6.70203   1
   4 -22   0 13.2037 10.6763   5
   3 -22   0 87.7881 16.8659   5
   2 -22   0 -10.697  20.166   5
   1 -22   0 -5.0423 10.6958   5
   0 -22   0 -4.0959  6.4496   1
  -1 -22   0  1.5273 12.9437   5
  -9  23   0 20.4260  8.9720   4
  -8  23   0 268.337  28.114   4
  -4  23   0 -2.2257  5.0054   1
   1 -23   0 16.8799 16.1231   5
  -1  23  -1 3.06072 5.83599   1
   2 -23   1 -8.8284 11.9866   5
   4 -23   1 -19.913  11.308   5
   6 -23   1 -4.6865  7.1684   1
  -7  23  -1 23.9440  6.4718   1
  -8  23  -1 11.6206 10.7075   4
  -9  23  -1 149.635  18.331   4
  -9  23  -1 166.730  15.793   1
  -2 -22   1 8.40772 7.18056   1
  -1 -22   1 -15.764  13.249   5
   1 -22   1 2.14272 6.44407   1
   1 -22   1 -11.008  11.993   5
   3 -22   1 131.917  14.976   1
  -8  22  -1 -6.7753  4.8757   1
  -8  22  -1 2.80950 8.65688   4
  10 -22   1 -10.481   7.091   1
 -11  22  -1 10.1160  7.6327   4
 -12  22  -1 28.3641  8.5980   4
  -3 -21   1 81.3508 14.3932   5
  -3 -21   1 59.6306 10.6516   1
  -1 -21   1 -18.720  13.053   5
   0 -21   1 -10.646   8.205   5
   1 -21   1 8.13546 6.51860   1
   2 -21   1 7.55815 9.31762   5
   3 -21   1 50.5652 11.4503   5
   3 -21   1 66.2648 10.2992   1
   4 -21   1 81.1074 14.4449   5
  -5  21  -1 100.297  15.608   4
  -6  21  -1 53.3853 12.7769   4
  -7  21  -1 146.959  17.247   4
   7 -21   1 120.620  14.406   1
  -8  21  -1 41.1999 10.4848   4
   8 -21   1 27.7021  7.6066   1
  -9  21  -1 8.66661 8.07137   4
   9 -21   1 -14.446   7.010   1
 -10  21  -1 -7.1827  8.4984   4
 -11  21  -1 1.74977 8.55808   4
 -12  21  -1 11.9636  6.7012   1
 -12  21  -1 1.10169 8.01399   4
  12 -21   1 3.30890 8.41449   1
 -13  21  -1 -14.170   8.440   4
  13 -21   1 -10.892   6.578   1
 -14  21  -1 50.1683  9.4484   4
  14 -21   1 53.6425 10.4207   1
  -5 -20   1 27.3613  9.6530   5
  -4 -20   1 45.8894  9.4658   1
  -3 -20   1 122.977  22.476   5
   0  20  -1 1.35817 4.65408   1
   0 -20   1  5.6541 10.6133   5
  -1  20  -1 5.32474 6.51302   1
   1 -20   1 -14.066   8.830   1
   3 -20   1 27.0833  9.2968   1
  -4  20  -1 30.0482  6.5939   1
  -4  20  -1 20.2542 13.7536   4
   4 -20   1 45.5671 10.4680   1
  -5  20  -1 163.886  14.382   1
  -5  20  -1 129.413  16.631   4
   5 -20   1 117.061  16.750   5
   5 -20   1 141.179  16.042   1
  -6  20  -1 -2.1604  5.5194   1
  -6  20  -1 5.45562 7.67126   4
   6 -20   1 9.11607 8.29762   1
  -7  20  -1 115.899  12.037   1
  -7  20  -1 105.861  14.138   4
   7 -20   1 86.1990 12.9708   1
  -8  20  -1 27.6450  7.1984   1
   8 -20   1 19.1513  7.1083   1
  -9  20  -1 25.4718  7.0046   1
   9 -20   1 17.9918  8.0238   1
 -10  20  -1 10.0181  6.0383   1
 -10  20  -1 -6.2158  5.9244   4
 -11  20  -1 70.8735  9.2995   1
 -11  20  -1 47.9247  9.2478   4
  11 -20   1 76.1779 11.2089   1
 -12  20  -1 18.6408  7.3017   4
 -12  20  -1 12.9347  5.2798   1
 -13  20  -1 8.75327 7.91493   4
  13 -20   1 31.2132  8.9849   1
  14 -20   1 -0.1012  8.3140   1
 -15  20  -1 -1.1328  6.2925   4
  16 -20   1 67.3608 10.3964   1
  -8 -19   1 2.85511 8.06077   5
  -7 -19   1 92.1603 15.7148   5
   6  19  -1 16.8805  7.2618   3
   5  19  -1 14.9250  7.3071   1
   5  19  -1 -8.6163  6.6007   3
  -5 -19   1 -6.8967  7.3541   5
   4  19  -1 22.2780  7.1025   1
  -4 -19   1 6.31486 7.72509   1
  -4 -19   1 14.0305 11.3093   5
   3  19  -1 13.2971  7.2709   1
  -3 -19   1 15.2903  7.8515   1
  -3 -19   1 -8.9474  8.1123   5
   2  19  -1 45.3776  8.5196   1
  -2 -19   1 25.8562  9.3314   1
   1  19  -1 99.2507 11.6317   1
  -1 -19   1 82.6359 12.5883   1
   0  19  -1 51.0246  7.8455   1
  -1  19  -1 146.450  15.115   1
   1 -19   1 173.646  17.113   1
  -2  19  -1 49.5334  8.2724   1
   2 -19   1 63.3081 10.7625   1
  -3  19  -1 211.773  18.219   1
   3 -19   1 200.811  19.584   1
  -4  19  -1 30.2549  6.0082   1
  -4  19  -1 44.5317 10.7216   4
   5 -19   1 17.4136  8.5800   1
   5 -19   1 -3.4501 15.7325   5
  -6  19  -1 10.0324  6.3074   1
   6 -19   1 -16.143  17.053   1
   6 -19   1 -9.1402 14.3238   5
  -7  19  -1 -9.0217  6.0856   1
  -7  19  -1 12.6997  8.3560   4
   7 -19   1 1.84864 7.25035   1
  -8  19  -1 16.9801  6.2626   1
   8 -19   1  9.5544 14.8049   1
  -9  19  -1 45.6438  7.9386   1
   9 -19   1 43.0439  9.8442   1
 -10  19  -1 43.9968  7.9729   1
 -11  19  -1 10.7318  5.6767   1
 -12  19  -1 81.8183  9.4870   1
  12 -19   1 55.6410  9.4382   1
  13 -19   1 59.2377 10.0141   1
 -14  19  -1 -7.0928  6.2702   4
  14 -19   1 6.91142 6.72633   1
  15 -19   1 30.7981  8.4511   1
 -16  19  -1 5.06694 7.01617   4
  16 -19   1 -3.9000  6.8125   1
  17 -19   1 73.4647 10.9190   1
 -10 -18   1  7.9494 10.3807   5
  -9 -18   1 13.9515 10.3331   5
   8  18  -1 83.1459 11.7078   3
  -8 -18   1 72.1690 12.6236   5
   7  18  -1 139.917  13.773   1
  -7 -18   1 109.711  19.899   5
   6  18  -1 -0.9851  5.7611   3
   6  18  -1 -4.6148  6.2154   1
  -6 -18   1 -16.064  11.412   5
   5  18  -1 3.95151 6.36198   1
  -5 -18   1 -13.649   7.303   1
   4  18  -1 115.852  12.584   1
   3  18  -1 284.447  22.134   1
  -3 -18   1 236.363  25.340   5
  -3 -18   1 239.564  26.962   1
   2  18  -1 94.5980 11.7101   1
  -2 -18   1 93.8227 16.4243   1
   1  18  -1 184.929  17.550   1
  -1 -18   1 212.428  19.245   1
   0  18  -1 183.516  20.801   4
   0  18  -1 166.130  15.607   1
  -1  18  -1 66.6078  9.0443   1
  -1  18  -1 44.1402 11.1112   4
   1 -18   1 65.1631 10.2896   1
  -2  18  -1 -5.4431  7.5214   4
   2 -18   1 -4.5342 12.0993   1
  -3  18  -1 91.8695 10.9611   1
  -3  18  -1 124.504  14.068   4
   3 -18   1 95.6831 14.3093   5
   3 -18   1 100.629  12.644   1
  -4  18  -1 61.2909 11.4418   4
   4 -18   1 73.8079 10.7986   1
  -5  18  -1 89.0421  9.9779   1
  -5  18  -1 71.7040 12.0678   4
   5 -18   1 57.1618 11.1789   1
   5 -18   1 62.5882 11.9560   5
  -6  18  -1 156.856  15.309   1
  -6  18  -1 170.658  17.946   4
   6 -18   1 158.521  25.533   5
   6 -18   1 177.773  17.111   1
  -7  18  -1 12.7247  8.4471   4
  -7  18  -1 4.14734 5.51986   1
   7 -18   1 16.1504  8.4550   1
  -8  18  -1 50.3765 10.1689   4
  -8  18  -1 39.4242  7.8302   1
   8 -18   1 37.4719 17.8938   1
  -9  18  -1 222.900  18.897   1
   9 -18   1 220.465  20.914   1
 -10  18  -1 63.5359  8.9522   1
 -11  18  -1 31.8858  5.8398   1
  11 -18   1 35.4697  8.8711   1
 -12  18  -1 297.576  23.731   1
  12 -18   1 286.413  25.432   1
  13 -18   1 95.7128 12.7443   1
 -14  18  -1 -3.4164  7.6019   4
  14 -18   1 -0.6041  8.9000   1
  15 -18   1 84.8240 10.2879   1
  16 -18   1 44.7029  8.4136   1
 -17  18  -1 8.47510 8.60804   4
  17 -18   1 -3.0716  5.7701   1
  11  17  -1 21.0482  6.2919   1
  10  17  -1 28.7241  6.7870   1
   9  17  -1 21.1741  7.7004   3
   9  17  -1 1.96100 5.61036   1
   8  17  -1 -2.2419  4.8529   1
   8  17  -1 -1.0314  6.0707   3
  -8 -17   1 -14.859   9.781   5
   7  17  -1 9.08697 6.28171   1
   7  17  -1 6.36133 6.28916   3
  -7 -17   1 -7.5825  7.3605   5
   6  17  -1 -3.9837  6.4869   3
   6  17  -1 -5.7219  7.9553   1
  -6 -17   1 -7.4223  5.9114   1
  -6 -17   1  4.0652 14.9734   5
   5  17  -1 79.0726 18.8843   3
   5  17  -1 65.6038  9.1488   1
  -5 -17   1 87.4961 13.9989   1
   4  17  -1 15.4513  6.8104   1
  -4 -17   1  7.2619 22.4502   5
  -4 -17   1 9.16465 8.05268   1
   2  17  -1 522.845  39.822   1
  -2 -17   1 540.362  40.902   1
   1  17  -1 17.2922  7.0541   1
   1  17  -1 24.4085 17.0277   4
  -1 -17   1 35.1749 17.8558   1
   0  17  -1 84.5360 11.7647   4
   0 -17   1 61.4860  9.6114   1
  -1  17  -1 261.343  29.540   4
  -1  17  -1 254.759  20.446   1
   1 -17   1 230.938  21.492   1
  -2  17  -1 51.6532  7.3916   1
  -2  17  -1 69.0720 11.0635   4
  -3  17  -1 272.963  21.625   1
  -3  17  -1 237.910  25.017   4
   3 -17   1 285.161  22.817   1
  -4  17  -1 228.983  21.127   4
   4 -17   1 191.104  18.335   1
   4 -17   1 215.376  21.014   5
  -5  17  -1 94.0408 10.0331   1
   5 -17   1 96.9857 11.5926   1
   5 -17   1 68.3513 12.6527   5
   6 -17   1 40.4691 10.6199   5
  -7  17  -1 389.757  29.547   1
   7 -17   1 377.186  31.032   1
  -8  17  -1 454.760  49.637   4
  -8  17  -1 501.112  36.857   1
   8 -17   1 505.239  37.912   1
   9 -17   1  9.5562 10.7459   1
  10 -17   1 -7.5855 12.2228   1
 -11  17  -1 8.40416 8.01701   4
 -11  17  -1 12.9070  5.2582   1
  11 -17   1 4.74264 5.39342   1
 -12  17  -1 311.578  24.761   1
  12 -17   1 308.198  25.694   1
 -13  17  -1 12.0758  4.9356   1
  13 -17   1 15.8546  6.5445   1
  14 -17   1 210.851  19.031   1
 -15  17  -1 6.61630 7.37547   4
  16 -17   1 66.6287  9.8536   1
  17 -17   1 56.9473  8.7386   1
 -18  17  -1 236.058  23.449   4
  18 -17   1 241.435  20.387   1
 -19  17  -1 19.5059  8.8199   4
  12  16  -1 -4.7928  5.1884   1
  11  16  -1 21.3802  5.9911   1
  11  16  -1 13.8072  6.8930   3
  10  16  -1 561.139  41.860   1
   9  16  -1 2.22192 6.13640   3
   9  16  -1 -1.1056  5.0066   1
  -9 -16   1 -7.8372 10.3172   5
   8  16  -1 1.83720 5.08586   1
   7  16  -1 47.2928  8.2464   1
   7  16  -1 56.2401  8.2781   3
  -6 -16   1 -0.1660  7.5498   1
   5  16  -1 36.3518  5.1362   2
  -5 -16   1 46.1574 10.2557   1
   4  16  -1 178.034  17.245   2
   4  16  -1 164.444  15.778   1
  -4 -16   1 205.629  19.953   5
   3  16  -1 10.3719  4.9554   1
   3  16  -1 19.0159  3.3951   2
   2  16  -1 21.1652  8.1799   4
   2  16  -1 28.6386  5.6982   1
   1  16  -1 113.043  15.041   4
  -1 -16   1 82.8999 11.6341   1
   0  16  -1 15.8807  5.7570   1
  -1  16  -1 70.6707  8.7590   1
  -1  16  -1 30.3877 39.9054   4
   1 -16   1 79.1755 10.0728   1
  -2  16  -1 12.1016  4.6906   1
  -3  16  -1 36.4401  7.1535   1
   3 -16   1 45.0645  8.3366   1
  -4  16  -1 122.845  11.649   1
  -4  16  -1 117.689  14.827   4
  -5  16  -1 88.5827 11.8490   4
  -5  16  -1 85.0708  9.5904   1
   5 -16   1 107.100  11.789   1
   5 -16   1 88.6352 12.0349   5
  -6  16  -1 82.4923 15.1931   4
  -6  16  -1 91.1824  9.6992   1
   6 -16   1 95.1673 16.0019   1
   6 -16   1 64.2547 10.2600   5
  -7  16  -1 599.686  46.633   4
  -7  16  -1 529.648  40.430   1
   7 -16   1 520.951  41.295   1
  -8  16  -1 11.6257  7.0536   1
  -8  16  -1 10.5277  6.0015   4
  -9  16  -1 -2.9221  5.1567   1
  -9  16  -1 14.1390 13.0036   4
   9 -16   1 -4.0959  9.0459   1
 -10  16  -1 510.638  42.523   1
  10 -16   1 664.570  44.369   1
 -11  16  -1 -2.4845  4.8256   1
 -11  16  -1 -6.5885  8.9552   4
  11 -16   1 -11.757   6.276   1
 -12  16  -1 5.66172 6.48653   4
 -12  16  -1 11.0979  5.7124   1
  12 -16   1 8.30046 6.91315   1
 -13  16  -1 4.29817 9.79637   4
 -13  16  -1 4.36908 4.50208   1
  13 -16   1 1.88832 8.44213   1
  15 -16   1 4.65987 6.48348   1
 -16  16  -1 35.8289  7.8167   4
 -17  16  -1 -1.3694  9.3481   4
  17 -16   1 1.67001 4.88321   1
 -14 -15   1 149.136  18.312   5
  13  15  -1 -0.2124  4.0884   1
  13  15  -1 -4.4940  6.4374   3
  13  15  -1 -9.1878  5.4030   2
 -13 -15   1  1.7914 10.4006   5
  12  15  -1 39.2435  8.5135   3
  12  15  -1 44.4565  7.3559   2
  12  15  -1 49.1659  7.1824   1
  11  15  -1  6.6069 35.3025   3
  11  15  -1 10.2827  5.2764   1
  10  15  -1 145.450  13.749   1
  10  15  -1 148.603  13.722   2
   9  15  -1 4.77278 6.21593   3
   9  15  -1 1.74389 4.13752   2
  -9 -15   1 -13.545  13.755   5
   8  15  -1 -1.0282  4.8834   1
   8  15  -1 -3.3755  6.4875   3
  -8 -15   1 1.85910 9.75743   5
   7  15  -1 77.1157  8.0036   2
   7  15  -1 80.1993 10.6380   3
   6  15  -1 42.2384 10.0572   3
   6  15  -1 46.2290  6.8981   2
   6  15  -1 52.2147  8.7498   1
  -6 -15   1 50.8851  9.7785   5
   5  15  -1 21.5590  4.2590   2
   4  15  -1 9.86799 4.36863   2
  -4 -15   1 13.1784  6.1685   1
  -4 -15   1 19.4237 25.8901   5
   3  15  -1 163.658  14.078   1
   3  15  -1 140.772  12.680   2
  -3 -15   1 174.490  14.904   1
   2  15  -1 1.85067 4.02274   1
   2  15  -1 -12.268  44.713   4
  -2 -15   1 -4.3001  5.7330   1
  -2 -15   1 -11.222   8.258   5
  -1 -15   1 -4.4997 17.2889   5
  -1 -15   1 12.9315  5.1297   1
   0  15  -1 79.8129 10.0086   1
   0 -15   1 60.2807 13.2782   5
   0 -15   1 92.8378 12.9833   1
  -1  15  -1 5.98654 6.26214   1
   1 -15   1 6.65171 6.99335   5
  -2  15  -1 40.3493  6.5785   1
  -2  15  -1 36.3433 11.5996   2
   2 -15   1 58.2232 10.7663   5
  -3  15  -1 15.8875  2.7247   2
  -3  15  -1 -0.8031 16.1507   4
   3 -15   1 21.0449 13.0743   1
  -4  15  -1 21.3442 19.8799   4
   4 -15   1 31.0698  6.9334   1
   4 -15   1 36.4739 21.0130   5
  -5  15  -1 10.7931 16.7301   4
   5 -15   1 22.0064  8.1062   1
  -7  15  -1 114.040  23.711   4
  -7  15  -1 130.358  12.394   1
   7 -15   1 152.584  14.722   1
  -8  15  -1 -14.396  12.286   4
   8 -15   1 -0.6160  8.7698   1
  -9  15  -1 14.9591  5.2629   4
  -9  15  -1 8.77019 4.89476   1
 -10  15  -1 1.40532 6.34273   4
 -10  15  -1 -6.0520  4.0509   1
  10 -15   1 -12.842   8.693   1
 -11  15  -1 50.1624  7.3272   1
  11 -15   1 61.5858  8.7094   1
 -12  15  -1 58.4838  7.3114   1
  12 -15   1 79.1656  9.4973   1
 -13  15  -1 115.646  10.889   1
  13 -15   1 101.702  11.569   1
  14 -15   1 46.6891  7.8628   1
 -15  15  -1 29.4598  8.3828   4
  15 -15   1 22.2960  6.2133   1
 -16  15  -1 -0.8683  8.3377   4
  16 -15   1 7.05508 5.49836   1
  17 -15   1 14.2579  5.5897   1
 -18  15  -1 -3.2537  7.9309   4
  18 -15   1 -1.1376  4.6294   1
  19 -15   1 3.89852 5.74436   1
 -20  15  -1 -6.9465  8.9232   4
 -15 -14   1 0.21139 7.80604   5
  14  14  -1 265.521  22.120   2
 -14 -14   1 223.814  25.190   5
  13  14  -1 9.13660 6.08159   3
  13  14  -1 10.3652  4.7092   1
 -13 -14   1  7.2250 13.6914   5
  12  14  -1 -2.3086  4.2586   1
  12  14  -1 6.41008 5.25493   2
  12  14  -1 16.5626  5.5910   3
 -12 -14   1 19.6095  9.6162   5
  11  14  -1 0.54456 4.53434   3
  11  14  -1 4.85756 4.61703   2
  11  14  -1 10.5207  4.3834   1
  10  14  -1 18.9895  5.1883   1
  10  14  -1 22.5865  5.3157   2
  10  14  -1 25.6566  6.6983   3
   9  14  -1 -7.3727  5.9368   3
   9  14  -1 -4.6053  4.0428   2
   9  14  -1 -0.4489  3.4132   1
  -9 -14   1 -4.2554  6.9386   5
   8  14  -1 666.740  61.938   3
   8  14  -1 767.591  51.591   2
  -8 -14   1 645.736  54.833   5
  -8 -14   1 630.607  61.887   1
   7  14  -1 8.66472 5.67187   1
   7  14  -1 5.47393 8.47597   3
  -7 -14   1 -2.6190  9.5384   1
  -7 -14   1 -29.586  19.700   5
   6  14  -1 21.8688  6.7467   3
   6  14  -1 21.0896  4.3983   2
   6  14  -1 31.3684  6.3393   1
  -6 -14   1 16.5732  6.1163   1
   5  14  -1 144.609  13.468   1
   5  14  -1 145.184  13.651   4
  -5 -14   1 146.370  13.940   1
  -5 -14   1 108.484  38.969   5
   4  14  -1 27.8763  4.2168   2
  -4 -14   1 52.4283 13.2670   5
   3  14  -1 311.851  23.718   1
   3  14  -1 353.774  32.981   4
  -3 -14   1 259.341  23.747   1
   2  14  -1 104.338   9.633   2
  -2 -14   1 130.714  11.902   1
  -1 -14   1 238.484  45.207   5
  -1 -14   1 194.282  17.108   1
   0  14  -1 132.882  18.292   1
   0  14  -1 208.720  52.985   4
   0 -14   1 152.411 177.763   5
   0 -14   1 184.950  28.604   1
  -1  14  -1  4.8482 10.6893   4
  -1  14  -1 23.9133  4.8242   2
  -2  14  -1 25.2683 20.0333   4
  -2  14  -1 34.4041  5.5903   1
   2 -14   1 41.0348  9.0233   5
  -3  14  -1 443.553  42.250   4
  -3  14  -1 533.615  36.834   1
   3 -14   1 520.102  37.558   1
  -4  14  -1  8.1215 31.9055   4
   4 -14   1 32.2216 18.5931   5
   4 -14   1 27.2739  7.1535   1
  -5  14  -1 386.841  40.791   4
  -5  14  -1 427.960  31.296   1
   5 -14   1 456.877  32.339   1
   5 -14   1 401.632  35.019   5
  -6  14  -1 25.3867 13.0912   4
  -6  14  -1 20.0047 14.1946   1
   6 -14   1 19.9655  8.6510   5
   6 -14   1  9.6452 15.6361   1
  -7  14  -1 317.872  23.862   1
   7 -14   1 291.796  31.022   1
  -8  14  -1 123.684  25.454   4
  -8  14  -1 99.6219 16.9311   1
   8 -14   1 146.803  25.861   1
  -9  14  -1 64.2952  8.1091   1
  -9  14  -1 90.2857 11.3508   4
   9 -14   1 71.0377  9.8379   1
 -10  14  -1 124.023  11.286   1
 -10  14  -1 129.873  14.450   4
  10 -14   1 111.452  11.574   1
 -11  14  -1 130.430  11.976   1
 -11  14  -1 149.754  14.673   4
  11 -14   1 116.494  12.750   1
 -12  14  -1 72.3424 10.6608   4
 -12  14  -1 87.9433  8.7029   1
  12 -14   1 75.5083  8.7225   1
 -13  14  -1 -0.6079 20.9941   4
 -13  14  -1 18.9100  5.0283   1
  13 -14   1 22.8392  8.1333   1
 -14  14  -1 -4.4340 18.0490   4
  14 -14   1 9.07474 5.96311   1
  15 -14   1 24.4047  6.1327   1
 -16  14  -1 -4.4868  7.3680   4
  16 -14   1 -0.5698  4.5052   1
  17 -14   1 -7.6806  4.7958   1
 -21  14  -1 6.77237 9.14940   4
  15  13  -1 29.3422  7.6874   3
 -15 -13   1 46.5594 14.1756   5
  14  13  -1 19.7318  4.4399   1
  14  13  -1 13.7571  5.3649   3
  14  13  -1 26.3830  6.0346   2
  13  13  -1 -2.3174  3.7633   1
  13  13  -1 1.21230 5.09959   3
 -13 -13   1 -1.4937  8.5256   5
  12  13  -1 -7.0342  5.7117   3
  12  13  -1 0.33815 5.93136   1
  12  13  -1 -4.3685  4.2765   2
 -12 -13   1 0.59648 6.28839   5
  11  13  -1 -10.937   5.758   3
  11  13  -1 -0.3761  3.9169   1
  11  13  -1 7.36700 4.37704   2
  10  13  -1 103.909  10.643   2
  10  13  -1 101.984  10.564   1
   9  13  -1 71.2084  8.1590   1
   9  13  -1 58.4720  9.5686   3
   9  13  -1 57.4959  7.6665   2
  -9 -13   1 79.5723 12.7798   5
   8  13  -1 1241.08   81.83   2
   8  13  -1 1039.62   77.97   1
   8  13  -1 1094.69   89.87   3
  -8 -13   1 995.820  84.890   5
  -8 -13   1 1164.94   85.83   1
   7  13  -1 1.43482 4.37989   1
   7  13  -1 3.00584 3.35168   2
   7  13  -1 -3.9623  3.9354   3
  -7 -13   1 -16.670  18.798   5
  -7 -13   1 2.04441 4.67313   1
   6  13  -1 79.6378  8.9254   2
   6  13  -1 100.176   9.670   1
   6  13  -1 74.4857 10.1480   3
  -6 -13   1 58.3795 29.3471   5
   5  13  -1 17.4275  3.6356   2
  -5 -13   1 29.6151  6.1981   1
  -5 -13   1 18.5078 11.6349   5
   4  13  -1 48.4701 21.0146   4
   4  13  -1 37.0708  5.0540   2
   4  13  -1 55.2869  7.0200   1
  -4 -13   1 51.8745  7.8113   1
  -4 -13   1 55.1602 25.7700   5
   3  13  -1 129.929  12.036   1
  -3 -13   1 120.385  25.994   5
  -3 -13   1 133.733  13.491   1
   2  13  -1 15.5312 19.0877   4
   2  13  -1 34.3357  4.4127   2
   2  13  -1 52.9625 14.3308   1
  -2 -13   1 45.4299 10.3050   5
  -2 -13   1 51.8054 21.0211   1
   1  13  -1 2.11686 2.43890   2
  -1 -13   1  9.5119 10.0352   5
  -1 -13   1 13.4955  6.7140   1
   0  13  -1 21.0627  6.3320   2
   0 -13   1 15.9376 11.1520   1
   0 -13   1 28.8685  9.2016   5
  -1  13  -1 -17.031  11.220   4
  -1  13  -1 -6.5643 11.4107   1
  -1  13  -1 2.73286 4.54934   2
   1 -13   1  9.8265 12.2185   1
   1 -13   1 -5.0746 23.1704   5
  -2  13  -1  9.9748 60.1791   4
  -2  13  -1 23.6340 13.6299   2
  -2  13  -1 29.6126 12.0497   1
   2 -13   1 29.2745 41.7983   5
  -3  13  -1 160.036  16.442   1
   3 -13   1 141.091  28.752   5
   3 -13   1 154.633  16.747   1
  -4  13  -1 49.1424 15.1839   1
  -4  13  -1 59.0685 12.3096   4
   4 -13   1 40.4454 12.9665   1
   4 -13   1 47.5147  9.7391   5
  -5  13  -1 145.863  16.206   1
  -5  13  -1 168.581  22.642   4
   5 -13   1 152.155  23.793   5
   5 -13   1 124.639  28.589   1
  -6  13  -1 32.2174  7.6724   4
  -6  13  -1 54.7477 22.3425   1
   6 -13   1 38.5842 35.4540   5
  -7  13  -1 2055.36  151.85   4
  -7  13  -1 1880.47  132.57   1
   7 -13   1 1800.81  132.94   1
  -8  13  -1 588.801  42.484   1
  -8  13  -1 515.067 116.890   4
   8 -13   1 598.455  51.605   1
  -9  13  -1 161.499  15.958   4
   9 -13   1 146.688  16.269   1
 -10  13  -1 38.1412  8.6743   4
  10 -13   1 31.5917  6.5953   1
 -11  13  -1 65.3051 17.5962   4
 -11  13  -1 72.8412  7.9004   1
  11 -13   1 76.5108  9.2814   1
 -12  13  -1 -6.0193  7.6156   4
 -12  13  -1 -1.2558  3.6567   1
  12 -13   1 -10.854   8.847   1
 -13  13  -1 59.0272  6.9508   1
 -13  13  -1 52.5114  9.5586   4
  14 -13   1 60.2715  7.5642   1
 -15  13  -1 61.7394 10.4821   4
  15 -13   1 88.3071  8.9658   1
  16 -13   1 31.3998  5.9124   1
 -17  13  -1 0.20151 5.98131   4
  17 -13   1 -2.0497  4.3873   1
 -18  13  -1 16.4745  8.3698   4
  18 -13   1 25.8543  4.9210   1
 -19  13  -1 60.1798 10.7860   4
 -20  13  -1 -0.4550  8.1568   4
 -21  13  -1 -13.241   8.993   4
  16  12  -1 49.6994  8.8196   3
 -16 -12   1 61.0450 11.2887   5
  15  12  -1 44.4222  8.3445   2
  14  12  -1 -1.8989  3.3220   1
  14  12  -1 -5.0006  5.6260   2
  14  12  -1 -2.6869  5.4661   3
 -14 -12   1 -4.5440  8.5469   5
  13  12  -1 29.5192  6.8538   3
  13  12  -1 29.0508  6.8699   2
  12  12  -1 32.5777  6.8490   3
  12  12  -1 21.7610  6.3489   2
  11  12  -1 56.6809  7.3106   2
  11  12  -1 43.0911  6.1860   1
  11  12  -1 38.1988  7.6250   3
 -11 -12   1 66.4890 14.1283   5
  10  12  -1 359.532  32.757   2
  10  12  -1 492.533  31.904   1
  10  12  -1 420.761  35.169   3
   9  12  -1 77.4096  8.2041   1
   9  12  -1 72.2535  8.4509   2
   9  12  -1 58.3763 31.9894   3
  -9 -12   1 36.3677 40.8214   5
   8  12  -1 1131.21   82.53   2
   8  12  -1 1158.15   78.97   1
   8  12  -1 1077.36   87.17   3
  -8 -12   1 1112.55   79.09   1
   7  12  -1 71.0180 13.6855   3
   7  12  -1 73.5607  8.4194   1
  -7 -12   1 76.9231  8.6824   1
   6  12  -1 650.154  49.804   3
   6  12  -1 604.572  46.443   2
  -6 -12   1 613.523  45.377   1
   5  12  -1 10.6474  7.1443   1
   5  12  -1 7.76920 3.34503   2
  -5 -12   1 10.5649  5.1400   1
  -5 -12   1 -2.8572 17.8585   5
   4  12  -1 70.4692  6.9676   2
   4  12  -1 119.477  31.646   4
   4  12  -1 62.7309  7.8535   1
  -4 -12   1 111.036  24.563   5
   3  12  -1 -2.0894  9.2022   1
  -3 -12   1 6.74298 7.61171   5
  -3 -12   1 -1.3303 10.7035   1
   2  12  -1 1.94208 3.55272   2
   2  12  -1 -13.728  12.863   1
  -2 -12   1 -9.0562  7.8870   5
  -2 -12   1  3.5256 10.7488   1
   1  12  -1 448.479  30.543   1
   1  12  -1 343.728  35.607   4
  -1 -12   1 437.701  31.043   1
   0  12  -1 1.83412 3.40545   2
   0  12  -1 -24.810  23.617   4
   0  12  -1 -6.1915  8.6863   1
   0 -12   1 -2.4959  5.5738   1
   0 -12   1  9.3181 43.9838   5
  -1  12  -1 25.4696 11.8138   2
  -1  12  -1 53.7940 19.9364   4
  -1  12  -1 28.4535  9.2985   1
   1 -12   1  2.8745 13.6273   1
  -2  12  -1 11.7879  5.3064   2
  -2  12  -1  9.1968 68.1286   1
   2 -12   1 8.81147 6.72860   1
   2 -12   1 20.6197 21.2540   5
  -3  12  -1 1119.37   76.03   1
  -3  12  -1 1020.28   86.48   4
   3 -12   1 1044.21   81.75   5
   3 -12   1 1147.87   76.52   1
  -4  12  -1  34.094 141.250   1
   4 -12   1  35.153 169.676   1
   4 -12   1 43.0248 36.0309   5
  -5  12  -1 18.7971 11.9221   1
  -5  12  -1  9.8455 11.4295   4
   5 -12   1 33.0866 12.0769   5
   5 -12   1 43.8200 28.2402   1
  -6  12  -1 87.8635  8.9641   1
   6 -12   1 75.7862 17.7785   1
   6 -12   1 91.9818 10.9740   5
  -7  12  -1 86.1129 37.8182   4
  -7  12  -1 81.4254 19.5133   1
   7 -12   1 48.4203 34.9728   1
  -8  12  -1 81.5049  9.3977   1
  -9  12  -1 13.1848 14.5742   4
  -9  12  -1 16.2239  7.2393   1
   9 -12   1 17.0679 15.7786   1
 -10  12  -1 5.40273 6.36350   4
 -10  12  -1 -0.8562  8.4872   1
  10 -12   1 4.36651 7.87553   1
 -11  12  -1 278.998  25.001   4
 -11  12  -1 259.690  21.020   1
  11 -12   1 292.432  21.953   1
 -12  12  -1 382.011  27.735   1
 -12  12  -1 366.247  32.482   4
  12 -12   1 368.975  28.133   1
 -13  12  -1 2.86218 3.91795   1
 -13  12  -1 7.94549 7.27113   4
  13 -12   1 -6.9509  5.0593   1
 -14  12  -1 224.279  22.104   4
  14 -12   1 242.282  18.789   1
  15 -12   1 11.4139  5.4272   1
  16 -12   1 1018.34   72.34   1
 -17  12  -1 -2.6617  8.4963   4
  17 -12   1 8.89686 4.00976   1
  18 -12   1 94.9269  8.9517   1
 -19  12  -1 -12.405   6.848   4
 -21  12  -1 -1.7569  8.5350   4
 -22  12  -1 16.1778  7.7782   4
  17  11  -1 -13.288   7.262   3
 -17 -11   1 -2.7477  7.8915   5
  16  11  -1 21.5817  6.8405   3
  15  11  -1 2.28719 4.19236   2
  15  11  -1 0.83981 5.26534   3
  14  11  -1 1.32667 5.11409   1
  13  11  -1 -1.6851  3.8757   3
  13  11  -1 6.91028 5.92152   2
  13  11  -1 4.51234 3.45969   1
 -13 -11   1 7.18470 7.94444   5
  12  11  -1 75.4001  7.8929   1
  12  11  -1 86.4263  9.5172   2
  12  11  -1 58.5705  9.0894   3
  11  11  -1 30.8159  6.0684   2
  11  11  -1 18.9589  4.6079   1
 -11 -11   1 25.0765  9.9032   5
  10  11  -1 21.3183  5.3001   2
  10  11  -1 14.0663  4.2917   3
 -10 -11   1 16.9744  9.8620   5
   9  11  -1 14.2330  5.5905   2
   9  11  -1 16.2953  8.6271   3
   9  11  -1 17.8813  6.6173   1
  -9 -11   1 10.4230 19.8845   5
   8  11  -1 4.52259 4.97973   2
   8  11  -1 5.74950 7.13242   1
   8  11  -1 16.1504  9.7515   3
  -8 -11   1 14.8825 31.8622   5
  -8 -11   1 8.01740 8.22447   1
   7  11  -1 103.558   9.867   2
   7  11  -1 106.725   9.797   1
   7  11  -1 96.8587 10.7259   3
  -7 -11   1 69.0989 43.7464   5
   6  11  -1 625.769  53.049   3
   6  11  -1 653.326  46.100   1
  -6 -11   1 640.613  46.299   1
   5  11  -1 35.1518  7.5548   2
   5  11  -1 53.7078  9.9857   1
   5  11  -1 38.4063  6.1712   4
  -5 -11   1 48.1613  6.8039   1
  -5 -11   1 25.0919 12.0168   5
   4  11  -1 26.3088 11.3613   1
   4  11  -1 13.2987  5.5416   2
  -4 -11   1 18.6856 29.1288   5
  -4 -11   1 3.47937 8.12230   1
   3  11  -1 3.56582 6.84687   2
   3  11  -1 5.95622 5.23074   1
   3  11  -1 -1.0444 29.3977   4
  -3 -11   1 8.17543 9.96138   1
  -3 -11   1 -8.6226  8.0718   5
   2  11  -1 88.7051  8.8514   1
   2  11  -1 87.0649 14.5112   4
  -2 -11   1 68.8496 10.5779   5
  -2 -11   1 96.7914 12.9062   1
   1  11  -1 40.7680 10.3549   4
   1  11  -1 30.2403  5.6287   2
  -1 -11   1 29.4544 11.9208   5
  -1 -11   1 49.6489  7.4097   1
   0  11  -1  9.3125 54.1194   4
   0  11  -1 23.5852  7.9774   1
   0  11  -1 11.2846  4.9612   2
   0 -11   1 20.6938 31.3375   5
   0 -11   1 18.8609 17.1619   1
  -1  11  -1 198.801  32.953   4
  -1  11  -1 192.978  15.547   1
   1 -11   1 179.085  22.646   5
   1 -11   1 197.360  19.333   1
  -2  11  -1 125.031  14.615   4
   2 -11   1 100.692  23.688   5
   2 -11   1 117.484  11.335   1
  -3  11  -1 114.215  29.583   4
  -3  11  -1 100.757  15.860   1
   3 -11   1 70.5897  9.2602   5
   3 -11   1 80.5839 20.7575   1
  -4  11  -1 263.279  30.982   4
   4 -11   1 227.481  21.386   5
   4 -11   1 216.494  21.045   1
  -5  11  -1 121.252  15.174   1
  -5  11  -1 136.314  22.210   4
   5 -11   1 119.153  13.860   5
   5 -11   1 133.923  24.773   1
  -6  11  -1 317.674  25.055   1
   6 -11   1 317.665  36.566   5
   6 -11   1 301.397  29.425   1
  -7  11  -1 249.926  20.786   1
  -7  11  -1 258.494  40.668   4
   7 -11   1 212.184  30.430   1
  -8  11  -1 785.882  55.924   1
   8 -11   1 796.666  56.400   1
  -9  11  -1 81.9752  7.5821   1
  -9  11  -1 66.9907  9.0828   4
 -10  11  -1 13.6790  4.1524   1
  10 -11   1 5.22476 7.23082   1
 -11  11  -1 -8.3808 23.3349   4
 -11  11  -1 -7.3691  7.1698   1
  11 -11   1  1.0009 12.1537   1
 -12  11  -1 786.352  55.622   1
  12 -11   1 787.920  55.995   1
 -13  11  -1 46.2807 18.6772   4
 -13  11  -1 27.2335  7.0044   1
  13 -11   1 22.6028 16.5505   1
 -14  11  -1 289.781  25.812   4
  14 -11   1 266.983  21.325   1
 -15  11  -1 102.890  20.429   4
  15 -11   1 84.1080  8.5673   1
  16 -11   1 58.7209  6.7913   1
 -17  11  -1 -11.344   8.304   4
  17 -11   1 -4.2526  3.6721   1
  18 -11   1 69.9870  7.6893   1
 -19  11  -1 -14.036   8.670   4
 -22  11  -1 54.8338 10.2200   4
  18  10  -1 52.5431  9.1771   3
  17  10  -1 -4.2233  5.5583   3
 -17 -10   1 -2.8447  7.6854   5
  16  10  -1 -9.9030  6.0001   3
  16  10  -1 -0.2608  6.2401   2
 -16 -10   1 -13.720   8.162   5
  15  10  -1 -3.5652  4.6945   3
  15  10  -1 -6.5752  6.0517   2
 -15 -10   1 -5.5568  6.0214   5
  14  10  -1 404.339  41.828   1
  14  10  -1 433.096  35.375   3
  13  10  -1 54.0061  7.9791   3
  13  10  -1 38.8766  5.3265   1
  13  10  -1 48.8414  8.0261   2
 -13 -10   1 54.9403  9.4507   5
  12  10  -1 577.544  45.805   3
 -12 -10   1 554.577  45.123   5
  11  10  -1 2.44061 3.59302   2
  11  10  -1 -0.3813  3.2167   1
 -11 -10   1 -6.6519  7.1701   5
  10  10  -1 217.216  20.361   3
  10  10  -1 248.142  19.848   2
  10  10  -1 233.946  18.200   1
   9  10  -1  2.6720 11.5742   3
   9  10  -1 8.86574 8.13444   2
   9  10  -1 -3.8597  9.6719   1
  -9 -10   1 3.87824 3.30332   1
  -9 -10   1 10.5093 23.5661   5
   8  10  -1 264.127  22.666   2
   8  10  -1 315.661  24.146   3
   8  10  -1 233.430  55.024   1
  -8 -10   1 297.200  88.873   1
   7  10  -1 211.737  18.174   2
   7  10  -1 179.924  18.988   1
   7  10  -1 208.920  19.870   3
  -7 -10   1 219.128  20.749   1
  -7 -10   1 190.755  19.115   5
   6  10  -1 47.6539 26.3446   2
   6  10  -1 53.8395 27.2966   1
   6  10  -1 78.0212  8.9631   3
  -6 -10   1 76.1948 39.8728   1
  -6 -10   1 78.2388 42.5970   5
   5  10  -1 419.322  32.140   2
   5  10  -1 432.767  31.103   1
   4  10  -1 -6.7260  5.5432   4
   4  10  -1 -4.0181 11.5994   1
   4  10  -1 -1.5740  3.1882   2
  -4 -10   1 2.56083 3.00227   4
  -4 -10   1 8.21869 9.44853   5
  -4 -10   1 -19.046  10.141   1
   3  10  -1 364.381  29.599   2
  -3 -10   1 433.715  34.352   5
   2  10  -1 363.390  28.841   1
   2  10  -1 385.716  33.314   4
  -2 -10   1 409.516  29.141   1
   1  10  -1 18.0936 19.3968   4
   1  10  -1 4.16057 6.40241   2
   1  10  -1 -0.9170  9.4642   1
  -1 -10   1 -3.8258 12.9285   1
  -1 -10   1 -11.771  17.536   5
   0  10  -1 41.8683  7.7264   1
   0  10  -1 34.4293 31.9299   4
   0 -10   1 31.7126 17.2210   5
   0 -10   1 36.3650 15.5979   1
  -1  10  -1 854.284  77.933   4
  -1  10  -1 1056.03   68.63   1
   1 -10   1 1026.03   68.83   1
  -2  10  -1 1015.98   83.23   4
  -2  10  -1 1016.99   73.10   1
   2 -10   1 1029.13   78.33   5
   2 -10   1 1132.71   73.62   1
   3 -10   1 424.814  30.982   1
  -4  10  -1 16.4675  7.0623   1
  -4  10  -1 25.1619  8.5276   4
   4 -10   1 26.4026 16.6615   1
   4 -10   1 29.3998 16.2649   5
  -5  10  -1 211.648  32.101   4
  -5  10  -1 241.428  18.771   1
   5 -10   1 225.936  21.022   5
   5 -10   1 256.943  30.590   1
  -6  10  -1 110.754  10.138   1
  -6  10  -1 86.3426 16.8929   4
   6 -10   1 100.612  16.013   1
  -7  10  -1 152.210  39.353   4
  -7  10  -1 170.785  16.999   1
   7 -10   1 175.141  20.146   1
  -8  10  -1 1295.17   89.37   1
   8 -10   1 1277.14   89.64   1
  -9  10  -1 78.8159  7.2469   1
  -9  10  -1 64.8908  9.0579   4
   9 -10   1 99.1335 15.8280   1
 -10  10  -1 1867.27  149.29   4
 -10  10  -1 1930.19  130.17   1
  10 -10   1 1857.80  130.39   1
 -11  10  -1  1.2248 15.2339   4
 -11  10  -1 4.08486 7.32081   1
  11 -10   1 11.1019  5.6870   1
 -12  10  -1 1015.45   68.07   1
 -12  10  -1 998.348  78.744   4
  12 -10   1 900.358  68.040   1
 -13  10  -1 427.502  28.690   1
 -13  10  -1 334.290  33.373   4
  13 -10   1 412.082  28.926   1
 -14  10  -1 662.662  56.648   4
  14 -10   1 707.628  48.743   1
 -15  10  -1 25.0844  9.8058   4
  15 -10   1 26.4940  4.4057   1
 -16  10  -1 2.09021 5.45545   4
  16 -10   1 11.0160  3.3839   1
  17 -10   1 33.3861  4.5086   1
 -18  10  -1 7.72153 8.15568   4
  18 -10   1 4.43995 2.52432   1
 -19  10  -1 -25.530  15.667   4
 -22  10  -1 3.02292 6.76594   4
  18   9  -1 15.8377  6.5506   3
 -18  -9   1 -4.7784  7.6042   5
  17   9  -1 6.49878 5.53135   3
  16   9  -1 19.9625  6.3493   3
  15   9  -1 34.4890  7.2210   2
  15   9  -1 19.8204  6.6733   3
 -15  -9   1 7.59278 8.19901   5
  14   9  -1 3.83435 3.08873   1
  14   9  -1 12.0889  5.8253   2
  14   9  -1 0.21398 4.66301   3
 -14  -9   1  5.7368 13.8472   5
  13   9  -1 29.8338  4.3912   1
  13   9  -1 24.9002 16.4159   3
  13   9  -1 36.6019  6.0974   2
  12   9  -1 59.5350  8.1056   3
  12   9  -1 44.7543  5.5478   1
 -12  -9   1 49.3728 11.5350   5
  11   9  -1 20.8385  3.9231   1
  11   9  -1 17.7679  5.7777   2
  10   9  -1 317.926  24.452   3
  10   9  -1 245.846  21.182   1
 -10  -9   1 294.637  21.449   1
 -10  -9   1 277.826  27.744   5
   9   9  -1 -8.2269  6.6561   2
   9   9  -1 -6.5752  5.6268   3
   9   9  -1 -2.5451  6.0246   1
  -9  -9   1  8.9992 35.8222   1
  -9  -9   1 -13.946   8.802   5
   8   9  -1 678.780  85.547   1
   8   9  -1 879.624  64.118   3
   8   9  -1 879.034  86.271   2
  -8  -9   1 753.869 114.494   1
   7   9  -1 31.1856  6.6678   2
   7   9  -1 30.2436  5.3081   1
   7   9  -1 32.2869  7.4775   3
  -7  -9   1 30.9332 12.5165   1
  -7  -9   1 22.8514 15.7155   5
   6   9  -1 566.505  39.394   1
   6   9  -1 570.190  43.297   3
   6   9  -1 544.839  41.035   2
  -6  -9   1 468.502  45.191   5
  -6  -9   1 585.124  39.554   1
   5   9  -1 1025.68   72.35   3
   5   9  -1 910.140  68.404   2
   5   9  -1 920.198  65.362   1
  -5  -9   1 831.880  70.438   5
  -5  -9   1 983.663  65.677   1
   4   9  -1 451.842  36.155   1
   4   9  -1 471.003  46.969   2
   4   9  -1 569.358  40.771   4
  -4  -9   1 482.776  73.698   5
  -4  -9   1 526.429  36.554   1
   3   9  -1 24.7065 12.1708   1
   3   9  -1 60.6809 13.9346   4
  -3  -9   1  8.4044 16.1963   5
  -3  -9   1 37.0992  7.8269   4
   2   9  -1 112.938  39.761   4
   2   9  -1 118.280  11.136   1
   2   9  -1 84.2058 11.1092   2
  -2  -9   1 132.875  12.948   1
  -2  -9   1 111.769  19.482   5
   1   9  -1 82.6415 13.4112   2
  -1  -9   1 127.146  19.904   1
  -1  -9   1 91.8667 11.0235   4
  -1  -9   1 104.852  10.000   5
   0   9  -1 320.280  22.560   1
   0  -9   1 295.465  29.858   5
   0  -9   1 329.815  24.371   1
   0  -9   1 270.936  24.822   4
  -1   9  -1 542.066  37.571   1
   1  -9   1 450.210  37.982   5
   1  -9   1 505.763  37.359   1
  -2   9  -1 64.7981  7.8991   1
  -2   9  -1 60.2786 10.2685   4
   2  -9   1 69.1447  8.8739   1
   2  -9   1 63.1138 10.2345   5
  -3   9  -1 21.6644  3.6211   1
  -3   9  -1 27.0288  8.4397   4
   3  -9   1 17.2985  4.9032   5
   3  -9   1 21.2615  5.3068   1
  -4   9  -1 169.413  13.908   1
  -4   9  -1 78.6087 63.4826   4
   4  -9   1 185.949  15.372   5
   4  -9   1 185.155  14.423   1
  -5   9  -1 103.425   9.304   1
   5  -9   1 97.4098  9.3855   1
   5  -9   1 114.349  13.954   5
  -6   9  -1 105.227  14.573   4
  -6   9  -1 96.6272  9.7511   1
   6  -9   1 82.8871  9.1848   1
  -7   9  -1 1609.24  115.51   4
  -7   9  -1 1512.99  100.64   1
   7  -9   1 1240.63  100.57   1
  -8   9  -1 309.726  22.457   1
   8  -9   1 296.987  22.827   1
  -9   9  -1 22.1497  4.0099   1
   9  -9   1 19.5587  5.1450   1
 -10   9  -1 511.119  35.648   1
 -10   9  -1 524.883  42.544   4
  10  -9   1 503.041  35.914   1
  10  -9   1 455.514  35.632   1
 -11   9  -1 513.941  48.353   4
 -11   9  -1 666.304  42.053   1
  11  -9   1 528.448  43.088   1
  11  -9   1 649.606  42.266   1
 -12   9  -1 31.7479 11.6261   4
 -12   9  -1 32.4999  4.5309   1
  12  -9   1 26.2715  6.0785   1
 -13   9  -1 24.7521  5.5747   1
 -13   9  -1 15.5484 21.4251   4
 -14   9  -1 2.39555 6.66726   4
  14  -9   1 5.91399 2.81972   1
 -15   9  -1 21.8018  7.7611   4
  15  -9   1 14.2743  4.5784   1
 -16   9  -1 70.0984 10.6815   4
  16  -9   1 61.1395  6.1207   1
 -17   9  -1 -5.6033  9.3005   4
 -19   9  -1 2.92592 9.00512   4
 -20   9  -1 149.693  17.337   4
 -21   9  -1 -11.080   8.365   4
 -22   9  -1 1.42206 7.87200   4
 -19  -8   1 22.7649  7.8958   5
  18   8  -1 108.167  12.943   3
 -18  -8   1 131.653  19.462   5
  17   8  -1 3.96519 5.58762   3
 -17  -8   1 -9.0206  9.9942   5
  16   8  -1 71.3646  8.9479   3
 -16  -8   1 82.8364 14.9760   5
  15   8  -1 61.6234  8.5054   3
 -15  -8   1 43.2155 11.5130   5
  14   8  -1 4.21410 5.36224   2
  14   8  -1 11.5456  4.8963   3
 -14  -8   1 3.55593 6.31683   5
  13   8  -1 6.29273 5.43169   2
  13   8  -1 5.06117 4.92019   3
  13   8  -1 0.73378 2.68805   1
  12   8  -1 62.7151  6.3984   1
  12   8  -1 75.5311  8.7029   3
 -12  -8   1 67.1286  8.6758   5
  11   8  -1 13.0775  7.9672   1
  11   8  -1 -3.1378 16.7829   3
  11   8  -1 11.1190  7.5908   2
 -11  -8   1 19.0284  9.8030   5
  10   8  -1 2793.22  205.67   3
  10   8  -1 2509.30  198.15   2
  10   8  -1 2768.31  199.73   1
 -10  -8   1 2642.77  297.33   1
   9   8  -1 35.4101  9.4122   2
   9   8  -1 17.6820 13.2441   3
   9   8  -1 33.0315  9.0201   1
  -9  -8   1 26.2222  7.4452   1
   8   8  -1 4.99926 3.83667   1
   8   8  -1 1.35176 4.09147   3
   8   8  -1 6.96173 2.44731   1
   8   8  -1 12.3363  9.0158   2
  -8  -8   1 -9.5062 13.2714   5
  -8  -8   1 4.30249 5.42997   1
   7   8  -1 58.1699 11.1918   1
   7   8  -1 44.8297  8.9320   2
   7   8  -1 51.6953  4.9907   1
   7   8  -1 50.4179  7.8813   3
  -7  -8   1 52.3852 10.7078   1
  -7  -8   1 30.7591 13.2191   5
  -7  -8   1 27.3864 12.2807   4
   6   8  -1 370.097  25.736   1
   6   8  -1 365.971  28.473   3
   6   8  -1 351.907  26.192   1
  -6  -8   1 324.996  29.819   5
   5   8  -1 574.472  39.644   1
  -5  -8   1 549.477  40.788   1
  -5  -8   1 534.679  78.022   4
   4   8  -1 774.491  57.643   2
   4   8  -1 829.627  55.281   1
  -4  -8   1 628.082 101.265   4
  -4  -8   1 830.169  59.930   5
   3   8  -1 161.683  14.953   1
  -3  -8   1 120.167  22.410   4
  -3  -8   1 138.387  52.127   5
  -3  -8   1 169.724  12.951   1
   2   8  -1 1764.94  167.68   2
   2   8  -1 2017.51  178.15   4
   2   8  -1 2096.92  144.74   1
  -2  -8   1 2364.47  145.11   1
  -2  -8   1 2222.22  159.34   5
   1   8  -1 -0.1949  7.4506   2
   1   8  -1 22.5930 36.4581   4
   1   8  -1 -2.2817 11.6580   1
  -1  -8   1 0.09748 2.73880   4
  -1  -8   1 -4.6925 11.9620   1
  -1  -8   1 -6.6058 10.3619   5
   0   8  -1 754.266  59.794   4
   0   8  -1 752.143  49.982   1
   0  -8   1 734.784  53.699   5
   0  -8   1 535.297  75.950   4
  -1   8  -1 95.0654 14.1188   4
   1  -8   1 125.646  10.230   4
   1  -8   1 122.200  33.610   5
   1  -8   1 84.7219 16.0976   1
  -2   8  -1 95.3854  9.3234   1
  -2   8  -1 99.9902 14.7131   4
   2  -8   1 117.748   9.539   5
  -3   8  -1 1548.01  109.53   4
  -3   8  -1 1331.56   95.72   1
   3  -8   1 1341.00   95.95   1
   3  -8   1 1322.89  106.17   5
  -4   8  -1 232.521  18.898   4
  -4   8  -1 196.513  16.176   1
   4  -8   1 221.761  17.668   5
  -5   8  -1 889.756  68.624   1
   5  -8   1 998.277  68.968   1
   5  -8   1 1089.68   77.68   5
  -6   8  -1 -3.8302 18.8007   1
  -6   8  -1 -5.7888 29.6061   4
   6  -8   1 -6.5160 15.5646   1
  -7   8  -1 81.0474 20.6157   4
  -7   8  -1 110.463  16.989   1
  -8   8  -1 -4.8557  7.9176   1
  -8   8  -1 -9.5419  9.6832   4
  -9   8  -1 74.3549  9.4427   4
  -9   8  -1 98.0402  8.0453   1
   9  -8   1 117.611  13.898   1
   9  -8   1 90.7124  8.0887   1
 -10   8  -1 -4.2967  6.4380   1
 -10   8  -1 -10.284  16.983   4
  10  -8   1 -3.0760  4.5600   1
 -11   8  -1 335.129  23.507   1
 -11   8  -1 329.599  31.906   4
  11  -8   1 350.424  24.085   1
  11  -8   1 277.365  23.347   1
 -12   8  -1 510.012  35.203   1
 -12   8  -1 452.680  41.272   4
  12  -8   1 521.958  35.479   1
 -13   8  -1 48.6090  5.1038   1
 -13   8  -1 52.5277 10.4666   4
  13  -8   1 42.5348  8.8633   1
  14  -8   1 21.6575  3.5166   1
 -15   8  -1 13.3375  7.3953   4
  15  -8   1 21.2407  3.3471   1
 -16   8  -1 28.0197  8.2355   4
  16  -8   1 28.1067  3.5254   1
  17  -8   1 97.9902  7.8518   1
 -18   8  -1 39.9055 12.8000   4
 -19   8  -1 -12.016   8.500   4
 -22   8  -1 -3.6369  9.0343   4
 -23   8  -1 -2.3076  6.3035   4
  20   7  -1 -7.3793  6.2553   3
 -19  -7   1 27.5735  7.9633   5
  18   7  -1 86.8672 11.5867   3
 -18  -7   1 106.553  11.951   5
  17   7  -1 1.57949 5.77771   3
  17   7  -1 7.54881 6.11760   2
 -17  -7   1 4.79053 6.78924   5
  16   7  -1 52.2018  8.1146   3
 -16  -7   1 49.2024 13.4574   5
  15   7  -1 76.7764  9.4548   3
 -15  -7   1 63.8333 12.7430   5
  14   7  -1 8.81194 6.01739   2
  14   7  -1 13.5246  5.1944   3
 -14  -7   1 0.72892 9.72133   5
  13   7  -1 24.5974  6.0215   3
  13   7  -1 35.0607  6.8325   2
  13   7  -1 22.7775  4.7292   1
  12   7  -1 147.900  12.485   1
  12   7  -1 174.894  15.403   3
 -12  -7   1 172.492  20.096   5
  11   7  -1 64.0851  9.7987   2
  11   7  -1 32.1013 11.4817   1
  11   7  -1 41.2892 19.2502   3
 -11  -7   1 47.7609  6.0416   1
 -11  -7   1 27.5784 37.0142   5
  10   7  -1 224.152  17.460   2
  10   7  -1 188.451  17.014   1
  10   7  -1 206.873  17.818   3
 -10  -7   1 187.528  15.170   1
   9   7  -1 75.1657 11.0979   1
   9   7  -1 80.1143  6.8412   1
   9   7  -1 87.4809  9.0133   2
   9   7  -1 87.5474 11.6132   3
  -9  -7   1 67.1901  8.0195   1
  -9  -7   1 67.9022 13.8457   5
   8   7  -1 1099.83   72.70   1
   8   7  -1 1107.85   80.65   3
   8   7  -1 940.695  74.565   1
  -8  -7   1 1028.85   75.42   1
   7   7  -1 35.6131 10.7497   2
   7   7  -1 30.2611 10.0711   1
   7   7  -1 27.9250  3.5877   1
   7   7  -1 37.1558 12.9370   3
  -7  -7   1 29.3380  9.2262   4
  -7  -7   1 31.9835 11.1130   5
  -7  -7   1 39.6751 11.0473   1
   6   7  -1 6.44014 3.31396   1
   6   7  -1 3.10905 2.08001   1
   6   7  -1 -3.2958  4.0337   3
  -6  -7   1 6.87916 3.94602   1
  -6  -7   1 8.37029 3.19177   4
  -6  -7   1 -3.9224  7.9593   5
   5   7  -1 109.232  10.065   3
   5   7  -1 113.297   9.651   2
   5   7  -1 113.126   9.342   1
   5   7  -1 96.7239 13.5959   1
  -5  -7   1 101.529  22.128   5
  -5  -7   1 97.5319  9.2981   1
  -5  -7   1 137.819  56.323   4
   4   7  -1 876.206  59.241   1
   4   7  -1 754.139  58.995   1
   4   7  -1 929.041  67.042   4
   4   7  -1 810.894  61.981   2
  -4  -7   1 818.624  63.706   5
  -4  -7   1 908.670  59.418   1
   3   7  -1 36.4182 35.8147   4
   3   7  -1 54.2928  5.4449   1
  -3  -7   1 70.2105  9.7811   4
  -3  -7   1 80.4517 11.7794   5
   2   7  -1 -30.951  46.216   4
   2   7  -1 25.4150  4.7043   2
   2   7  -1 25.6416 14.3573   1
   2   7  -1 16.9674  8.7254   1
  -2  -7   1  30.631 170.959   5
  -2  -7   1 17.6607  4.2649   4
   1   7  -1 118.554  16.403   1
   1   7  -1 78.9104 10.1795   2
   1   7  -1 85.8072 13.9771   4
  -1  -7   1 103.748   8.379   4
  -1  -7   1 91.8428  9.3869   1
   0   7  -1 0.59538 5.57482   1
   0   7  -1 11.9086 11.9442   2
   0   7  -1  8.0890 13.6381   4
   0  -7   1 10.4216  5.5988   4
   0  -7   1 15.0161 12.5361   5
  -1   7  -1 80.6525 12.0045   4
  -1   7  -1 82.8163 15.9547   1
   1  -7   1 84.2264 10.8703   5
   1  -7   1 88.9587 19.5521   1
   1  -7   1 92.6623 30.9194   4
  -2   7  -1 1263.04  102.35   4
  -2   7  -1 1283.00   89.36   1
   2  -7   1 1251.03  113.25   4
   2  -7   1 1357.51   89.58   1
   2  -7   1 1315.68   97.18   5
  -3   7  -1 719.107  54.792   4
   3  -7   1 765.501  51.420   5
   3  -7   1 572.093  47.814   1
  -4   7  -1 269.409  22.141   1
  -4   7  -1 266.374  24.591   4
  -4   7  -1 307.254  21.568   5
   4  -7   1 292.997  21.996   5
   4  -7   1 257.832  22.539   1
  -5   7  -1 453.517  37.273   4
  -5   7  -1 504.374  34.104   5
  -5   7  -1 405.211  31.968   1
   5  -7   1 500.676  34.526   1
   5  -7   1 403.707  31.999   1
  -6   7  -1 2750.10  185.75   1
  -6   7  -1 2818.03  212.74   4
   6  -7   1 2561.20  188.40   1
  -7   7  -1 645.016  49.631   4
  -7   7  -1 625.304  50.658   1
   7  -7   1 552.855  54.371   1
   7  -7   1 603.492  53.462   1
  -8   7  -1 250.353  18.089   1
  -8   7  -1 248.706  24.076   4
   8  -7   1 218.268  17.476   1
   8  -7   1 240.887  18.300   1
  -9   7  -1 463.933  31.602   1
  -9   7  -1 381.929  36.506   4
   9  -7   1 426.613  31.556   1
   9  -7   1 504.143  31.905   1
 -10   7  -1 901.481  59.986   1
 -10   7  -1 864.985  69.538   4
  10  -7   1 848.218  60.074   1
  10  -7   1 833.317  59.942   1
 -11   7  -1 374.931  25.895   1
 -11   7  -1 369.873  35.207   4
  11  -7   1 363.993  26.125   1
  11  -7   1 335.233  25.826   1
 -12   7  -1 1563.54  106.71   1
 -12   7  -1 1691.27  123.73   4
  12  -7   1 1564.98  106.86   1
  12  -7   1 1294.44  137.08   1
 -13   7  -1 19.4996 17.8329   4
 -13   7  -1 18.9174  3.2199   1
  13  -7   1 29.6785 10.1960   1
 -14   7  -1 95.6462 11.4687   4
  14  -7   1 80.1347  7.3476   1
  15  -7   1 84.3922  6.9919   1
 -16   7  -1 39.4362  8.3621   4
  16  -7   1 35.2463  3.6378   1
 -17   7  -1 11.9499 16.7274   4
 -18   7  -1 514.482  44.502   4
 -19   7  -1 45.0086 10.7180   4
 -21   7  -1 -8.4115  7.8262   4
 -23   7  -1 2.62758 7.61469   4
  20   6  -1 18.0586  6.1530   3
  19   6  -1 10.7766  6.3458   3
 -19  -6   1 0.06828 6.62491   5
  18   6  -1 45.5556 10.0011   3
 -18  -6   1 23.0372 17.8899   5
  17   6  -1 0.10264 4.94086   3
  17   6  -1 2.65006 6.73522   2
 -17  -6   1 21.8192  7.1704   5
  16   6  -1 230.901  21.174   3
 -16  -6   1 235.951  20.711   5
  15   6  -1 35.7217  6.6829   3
  15   6  -1 48.5752  8.2748   2
 -15  -6   1 36.3847 10.6878   5
  14   6  -1 175.617  17.852   3
  14   6  -1 231.734  18.667   2
  13   6  -1 16.2839  3.2313   1
  13   6  -1 22.2798  5.8574   3
  13   6  -1 30.2708  6.5823   2
  12   6  -1 1949.18  131.66   2
  12   6  -1 1647.15  137.49   3
  11   6  -1 469.376  36.105   3
  11   6  -1 500.760  35.533   2
  11   6  -1 418.805  36.056   1
 -11  -6   1 441.485  35.853   5
 -11  -6   1 361.005  45.547   1
  10   6  -1 165.705  11.613   1
  10   6  -1 150.364  15.183   3
  10   6  -1 140.681  11.824   1
 -10  -6   1 155.338  15.341   5
   9   6  -1 67.2882  6.0328   1
   9   6  -1 82.9805 11.4107   1
   9   6  -1 84.0402 10.8352   2
   9   6  -1 64.1207 11.4127   3
  -9  -6   1 62.7477 10.5237   5
  -9  -6   1 68.6092  9.0312   1
   8   6  -1 351.733  25.351   3
   8   6  -1 274.158  24.016   2
   8   6  -1 316.994  22.301   1
  -8  -6   1 337.608  26.951   4
  -8  -6   1 252.823  22.203   1
  -8  -6   1 336.819  25.370   5
   7   6  -1 29.0678  3.4210   1
   7   6  -1 27.0584 10.7665   2
   7   6  -1 10.9825 13.1083   3
  -7  -6   1 32.8688  7.2740   4
  -7  -6   1 22.9496  7.4744   5
  -7  -6   1 17.2843  5.3018   1
   6   6  -1 991.351  70.198   2
   6   6  -1 1018.42   73.65   3
   6   6  -1 921.849  66.347   1
  -6  -6   1 896.332  87.938   4
  -6  -6   1 936.905 117.666   5
   5   6  -1 1112.59   85.76   1
   5   6  -1 1264.11   85.68   1
   5   6  -1 1288.28   90.22   2
   5   6  -1 1314.88   94.65   3
  -5  -6   1 1268.42   85.77   1
  -5  -6   1 1195.43   93.42   5
   4   6  -1 859.997  55.709   1
  -4  -6   1 869.042  60.125   5
  -4  -6   1 655.271  93.385   4
  -4  -6   1 750.640  55.879   1
   3   6  -1 131.580  12.947   2
   3   6  -1 155.041  12.511   1
   3   6  -1 161.163  11.844   1
  -3  -6   1 153.053  12.079   2
  -3  -6   1 141.754  12.987   5
  -3  -6   1 159.606  14.319   1
   2   6  -1 31.7487  5.0154   2
   2   6  -1 41.6275  4.0114   1
   2   6  -1 35.8736  5.0116   4
   2   6  -1 39.0110  6.7411   1
  -2  -6   1 35.3187  9.6653   5
  -2  -6   1 37.9509  4.3842   1
   1   6  -1 77.1720 14.3650   4
   1   6  -1 66.9343  9.2227   2
   1   6  -1 54.9452  7.3335   1
   1   6  -1 59.1917  5.3076   1
   0   6  -1 34.3890 11.0553   1
   0   6  -1 21.7092 18.6758   4
   0   6  -1 31.1093  9.1544   5
   0   6  -1 27.8386  5.8304   1
   0  -6   1 27.1268  8.3741   5
   0  -6   1 24.2538  6.8194   1
   0  -6   1 18.7964  4.8299   4
  -1   6  -1  1.9028 35.6303   1
  -1   6  -1 -1.0065 52.8105   4
  -1   6  -1 2.03518 4.40629   1
   1  -6   1  8.1075 17.2756   5
   1  -6   1  5.8121 24.2791   1
   1  -6   1 -0.2089  6.2201   1
   1  -6   1  2.1122 25.3291   4
  -3   6  -1 394.547  30.495   4
  -3   6  -1 353.012  26.190   1
   3  -6   1 399.462  28.236   5
   3  -6   1 329.369  26.298   1
   4  -6   1 4359.66  326.71   1
   4  -6   1 4882.41  316.93   1
  -5   6  -1 304.527  22.747   1
  -5   6  -1 340.208  33.313   4
   5  -6   1 316.020  25.645   1
  -6   6  -1 683.995  45.960   1
   6  -6   1 628.009  45.899   1
   6  -6   1 665.950  46.071   1
  -7   6  -1 345.029  23.892   1
   7  -6   1 339.378  24.702   1
   7  -6   1 319.195  23.931   1
  -8   6  -1 4622.63  315.69   1
  -9   6  -1 685.585  61.287   4
  -9   6  -1 626.906  45.424   1
   9  -6   1 657.272  45.611   1
   9  -6   1 647.458  45.524   1
 -10   6  -1 435.255  29.172   1
 -10   6  -1 438.414  35.404   4
  10  -6   1 374.147  29.043   1
  10  -6   1 400.582  29.173   1
 -11   6  -1  8.7478 16.6966   4
 -11   6  -1 5.92132 3.23712   1
  11  -6   1 19.8263  6.1351   1
  11  -6   1 12.5537  3.9441   1
 -12   6  -1 346.616  24.196   1
 -12   6  -1 396.070  37.153   4
  12  -6   1 297.199  24.129   1
  12  -6   1 341.701  24.551   1
 -13   6  -1 291.942  21.515   1
 -13   6  -1 326.469  27.747   4
  13  -6   1 291.106  21.630   1
  14  -6   1 49.4695  5.0360   1
 -15   6  -1 61.3579 10.4695   4
  15  -6   1 45.7851  4.2682   1
 -16   6  -1 95.3387  8.2994   5
 -16   6  -1 86.4846 11.5259   4
 -17   6  -1 5.85993 7.67881   4
 -18   6  -1 78.5781 11.0772   4
 -19   6  -1 -5.9898  8.6903   4
 -20   6  -1 31.8415  9.3117   4
 -21   6  -1 5.55123 6.70022   4
 -23   6  -1 8.34506 8.94014   4
  20   5  -1 46.5036  8.8525   3
  19   5  -1 7.14451 6.58318   3
 -19  -5   1 4.32297 6.16937   5
  18   5  -1 309.599  26.326   3
 -18  -5   1 273.397  25.380   5
  17   5  -1 9.15522 6.63749   2
  17   5  -1 3.66506 4.47869   3
 -17  -5   1 6.33756 6.11947   5
  16   5  -1 123.433  12.939   3
 -16  -5   1 111.213  16.341   5
  15   5  -1 68.9750  9.1769   3
  15   5  -1 87.4466 10.4520   2
 -15  -5   1 53.5693 13.5162   5
  14   5  -1 383.820  28.767   2
  14   5  -1 317.890  28.723   3
 -14  -5   1 342.035  28.269   5
  13   5  -1 47.8613  7.7633   3
  13   5  -1 44.4784  7.8571   2
 -13  -5   1 51.9251  9.9116   5
  12   5  -1 1789.73  147.10   3
  12   5  -1 2144.96  140.82   2
 -12  -5   1 1808.21  172.98   5
  11   5  -1 336.058  72.494   1
  11   5  -1 397.869  33.294   3
  11   5  -1 409.954  37.299   2
 -11  -5   1 390.541  30.292   1
 -11  -5   1 406.072  32.207   5
  10   5  -1 318.840  24.304   1
  10   5  -1 361.849  27.217   2
  10   5  -1 368.917  28.146   3
 -10  -5   1 332.092  27.363   5
   9   5  -1 284.249  23.031   3
   9   5  -1 243.854  20.983   1
   9   5  -1 317.000  24.174   2
   9   5  -1 275.360  20.083   1
  -9  -5   1 302.578  27.608   5
  -9  -5   1 277.002  20.231   1
   8   5  -1 78.6299  8.1920   2
   8   5  -1 92.8531  9.0355   3
   8   5  -1 81.0355  8.4900   1
   8   5  -1 86.5129  6.6629   1
  -8  -5   1 75.1879  6.7151   1
  -8  -5   1 83.2766  7.6682   4
  -8  -5   1 75.5161 12.0676   5
   7   5  -1 18.2369  7.4942   2
   7   5  -1 19.2292  2.5745   1
   7   5  -1 15.2042  4.0832   3
   7   5  -1 9.10527 5.01286   1
  -7  -5   1 19.4724  5.5640   4
  -7  -5   1 15.8123  5.4055   5
  -7  -5   1 19.0827  3.3426   1
   6   5  -1 862.787  61.997   2
   6   5  -1 844.979  64.852   3
   6   5  -1 856.553  58.502   1
   6   5  -1 843.257  58.547   1
  -6  -5   1 850.858  72.106   4
  -6  -5   1 785.653  58.505   1
  -6  -5   1 872.640  63.269   5
   5   5  -1 768.219  52.236   2
   5   5  -1 758.308  54.602   3
   5   5  -1 643.324  49.188   1
   5   5  -1 716.590  49.317   1
  -5  -5   1 612.145  72.324   4
  -5  -5   1 758.383  53.434   5
  -5  -5   1 675.410  49.309   1
   4   5  -1 589.312  40.579   1
   4   5  -1 589.492  40.534   1
   4   5  -1 587.695  45.160   3
  -4  -5   1 594.210  43.887   5
  -4  -5   1 539.592  47.705   4
  -4  -5   1 575.511  40.597   1
   3   5  -1 2.59361 2.66102   1
   3   5  -1 8.12268 5.40823   1
   3   5  -1 5.97215 3.48368   4
   3   5  -1 5.49935 7.49639   2
  -3  -5   1 3.11102 4.04436   5
  -3  -5   1 2.85789 3.70380   4
  -3  -5   1 -0.9285  8.2985   1
  -3  -5   1 0.76119 4.63905   2
   2   5  -1 325.912  26.538   4
   2   5  -1 325.864  24.510   1
   2   5  -1 371.136  25.329   5
   2   5  -1 328.443  23.408   1
   2   5  -1 309.985  25.539   2
  -2  -5   1 351.467  27.131   5
  -2  -5   1 286.919  23.369   1
  -2  -5   1 339.141  24.888   1
   1   5  -1 32.3972  5.1558   1
   1   5  -1 35.4475  8.8465   1
   1   5  -1 23.0794 10.6401   4
   1   5  -1 27.7402  7.3119   2
  -1  -5   1 24.7859  7.6228   4
  -1  -5   1 42.6471 17.2100   1
  -1  -5   1 29.0848  4.9159   1
  -1  -5   1 46.6855 11.1509   5
   0   5  -1 119.390  10.825   1
   0   5  -1 122.988  10.735   4
   0  -5   1 142.351  10.710   5
   0  -5   1 106.341  10.665   4
   0  -5   1 129.999   9.694   1
   0  -5   1 148.018  11.987   1
  -1   5  -1 457.631 184.329   4
  -1   5  -1 389.184  28.513   1
  -1   5  -1 567.571 133.517   1
   1  -5   1 507.169 192.830   4
   1  -5   1 452.220 104.315   1
   1  -5   1 397.433 118.612   1
  -2   5  -1 31.1354  3.6388   5
   2  -5   1  6.7336 12.8077   5
  -3   5  -1 3.35670 3.16931   4
  -3   5  -1 2.91266 2.07026   1
  -3   5  -1  8.5555 11.9260   1
   3  -5   1 1.10728 3.74558   5
   3  -5   1 1.04104 4.90263   1
   3  -5   1 4.23472 2.59205   1
  -5   5  -1 386.324  30.512   4
  -5   5  -1 354.676  25.722   1
   5  -5   1 322.823  31.602   1
  -6   5  -1 845.807  70.266   2
  -6   5  -1 981.706  66.782   1
  -6   5  -1 1036.62   76.96   4
   6  -5   1 1009.94   66.91   1
   6  -5   1 964.535  66.823   1
  -7   5  -1 12.5747  2.2667   1
   7  -5   1 12.5216  4.0055   1
   7  -5   1 12.3011  7.0066   1
  -8   5  -1 1086.81   72.85   1
   8  -5   1 1026.61   72.88   1
  -9   5  -1 86.4192  6.8761   1
   9  -5   1 85.3437  6.9579   1
   9  -5   1 88.0885 12.5331   1
 -10   5  -1 86.0424  6.8733   1
  10  -5   1 94.7492  7.0937   1
  10  -5   1 81.4425  9.5998   3
  10  -5   1 82.3127  6.9602   1
 -11   5  -1 356.946  24.842   1
  11  -5   1 353.124  30.356   3
  11  -5   1 345.136  24.907   1
 -12   5  -1 2205.62  159.99   1
  12  -5   1 2276.34  158.24   1
  12  -5   1 2330.48  173.60   3
 -13   5  -1 123.175   9.544   1
  13  -5   1 149.698  13.488   3
  13  -5   1 120.404  10.123   1
  14  -5   1 63.0559  5.3266   1
  14  -5   1 74.1564  8.6813   3
 -15   5  -1 121.549  14.065   4
 -15   5  -1 138.434  10.911   5
  15  -5   1 123.558  13.729   3
 -16   5  -1 23.1624  5.0324   5
 -16   5  -1 2.28728 7.23414   4
  16  -5   1 14.4585 11.6859   3
  17  -5   1 -10.100  10.422   3
 -18   5  -1 38.2420  8.9536   4
 -19   5  -1 -4.5943  7.9459   4
 -20   5  -1 23.2216  9.1830   4
 -21   5  -1 7.64192 7.49915   4
 -22   5  -1 13.8470  7.4251   4
 -23   5  -1 -9.1699  8.3810   4
  21   4  -1 16.4543  7.5754   3
  20   4  -1 -3.5662  6.4250   3
 -19  -4   1 19.6859  7.1149   5
  18   4  -1 449.111  36.897   3
 -18  -4   1 413.780  38.979   5
  17   4  -1 12.0007  5.8249   3
 -17  -4   1 -0.1880  6.3787   5
  16   4  -1 196.334  17.391   2
  16   4  -1 169.438  16.777   3
 -16  -4   1 172.220  16.682   5
  15   4  -1 81.2525 10.9247   2
  15   4  -1 66.0195 10.6446   3
 -15  -4   1 56.7651  8.7725   5
  14   4  -1 158.920  15.485   3
  14   4  -1 174.148  15.795   2
 -14  -4   1 164.959  20.618   5
  13   4  -1 160.559  16.110   3
  13   4  -1 192.308  16.370   2
 -13  -4   1 167.316  16.070   5
  12   4  -1 2592.65  178.07   2
  12   4  -1 2367.19  186.57   3
 -12  -4   1 2360.68  217.04   5
  11   4  -1 37.5383 28.2398   2
  11   4  -1 32.8544 17.5048   3
  11   4  -1 20.8869  6.7438   1
 -11  -4   1 30.9164  2.9789   1
 -11  -4   1 68.1490 25.0486   5
  10   4  -1 4.30046 8.77025   3
  10   4  -1 4.05504 3.65384   1
  10   4  -1 -5.3555  6.1960   2
 -10  -4   1 -1.8602 10.2148   5
 -10  -4   1 6.98859 1.67498   1
   9   4  -1 330.223  26.140   3
   9   4  -1 349.008  25.628   2
  -9  -4   1 275.988  24.768   1
  -9  -4   1 336.209  25.866   5
   8   4  -1 1009.49   79.99   3
   8   4  -1 1058.45   76.50   2
   8   4  -1 1030.42   71.72   1
  -8  -4   1 1074.22   77.75   5
   7   4  -1 69.5781  6.6272   3
   7   4  -1 58.0285  5.3589   1
   7   4  -1 56.4083  5.6017   1
   7   4  -1 64.8404  6.8085   2
  -7  -4   1 62.9714  7.5890   1
  -7  -4   1 63.1748  7.1662   4
  -7  -4   1 80.4753  8.5524   5
   6   4  -1 167.351  12.080   1
   6   4  -1 170.027  11.972   1
   6   4  -1 144.951  13.593   2
   6   4  -1 184.015  37.414   3
  -6  -4   1 176.840  16.700   5
  -6  -4   1 150.480  11.950   1
  -6  -4   1 192.988  28.399   4
   5   4  -1 52.6419  8.5271   2
   5   4  -1 47.1192  5.4286   1
   5   4  -1 54.5040  5.5634   1
   5   4  -1 62.8226  5.7360   3
  -5  -4   1 58.6282  5.3649   4
   4   4  -1 2008.71  149.99   2
   4   4  -1 2107.62  142.52   1
  -4  -4   1 1887.25  144.23   1
  -4  -4   1 2198.02  153.42   5
  -4  -4   1 2216.39  167.96   4
   3   4  -1 235.020  16.520   1
   3   4  -1 217.651  17.488   2
   3   4  -1 240.031  17.875   5
   3   4  -1 236.962  19.424   3
  -3  -4   1 205.576  18.664   4
  -3  -4   1 245.123  17.617   2
  -3  -4   1 213.782  16.455   1
  -3  -4   1 248.032  18.237   5
   2   4  -1 315.590  23.390   1
   2   4  -1 354.962  34.423   4
   2   4  -1 279.685  24.812   1
   2   4  -1 372.909  25.470   5
  -2  -4   1 306.582  23.358   1
  -2  -4   1 374.028  28.694   5
   1   4  -1 27.5085  4.9003   1
   1   4  -1 23.1868  5.0300   1
   1   4  -1 27.6064  3.5153   5
  -1  -4   1 23.6195  5.7190   1
  -1  -4   1 23.7275  5.7148   1
  -1  -4   1 29.4760  3.7967   5
   0   4  -1 31.1143 53.3617   1
   0   4  -1 31.6305 21.7454   1
   0  -4   1 32.7672  9.8017   5
   0  -4   1 26.8048 18.6737   1
   0  -4   1 17.5913 19.0372   4
   0  -4   1 25.6119 15.2411   1
  -1   4  -1 784.612  52.544   1
  -1   4  -1 727.517  52.491   1
  -1   4  -1 715.027  61.824   4
   1  -4   1 702.312  64.937   4
   1  -4   1 765.343  54.062   1
   1  -4   1 856.354  56.232   5
  -2   4  -1 511.349  39.521   1
  -2   4  -1 595.118  54.836   4
   2  -4   1 584.831  41.612   5
  -3   4  -1 448.409  37.280   4
  -3   4  -1 502.793  32.491   1
  -3   4  -1 447.089  32.468   1
  -4   4  -1 615.413  41.435   1
   4  -4   1 615.324  41.501   1
   4  -4   1 563.375  41.387   1
  -5   4  -1 774.098  55.460   1
  -5   4  -1 915.178  61.910   3
   5  -4   1 799.609  56.006   1
   5  -4   1 729.254  55.451   1
  -6   4  -1 831.761  54.021   1
  -6   4  -1 718.277  56.807   2
  -6   4  -1 815.948  54.005   1
   6  -4   1 773.831  54.001   1
   6  -4   1 731.401  60.191   3
   6  -4   1 823.047  54.090   1
  -7   4  -1 12.1202  2.2121   1
   7  -4   1 11.0755  5.3317   1
   7  -4   1 9.49800 2.46133   1
   7  -4   1  5.5802 18.7032   3
  -8   4  -1 -0.7452  7.6037   1
   8  -4   1 -1.8972  3.6715   1
   8  -4   1 -1.3829  1.5430   1
   8  -4   1 -11.064  21.579   3
  -9   4  -1 509.557  33.299   1
   9  -4   1 513.818  33.661   1
   9  -4   1 473.605  37.890   3
   9  -4   1 416.206  33.277   1
 -10   4  -1 140.623  10.088   1
  10  -4   1 139.604  13.895   1
  10  -4   1 107.945   9.390   1
  10  -4   1 131.063  24.261   3
 -11   4  -1 300.102  20.964   1
  11  -4   1 291.592  21.015   1
  11  -4   1 302.302  28.870   3
 -12   4  -1 339.670  24.795   1
  12  -4   1 375.548  30.220   3
  12  -4   1 353.387  24.910   1
  13  -4   1 4.25185 2.29113   1
  13  -4   1 2.85951 2.17922   1
  13  -4   1 -3.5014 20.4609   3
 -14   4  -1 -1.2680  3.4766   5
  14  -4   1 -2.7400  4.6258   3
 -15   4  -1 1.95653 2.59148   5
  15  -4   1 -7.2010  6.4259   3
  16  -4   1 927.199  73.386   3
 -17   4  -1 6.00696 7.30697   4
  17  -4   1 23.9831  7.8127   3
 -18   4  -1 48.2001  9.3252   4
  18  -4   1 36.8560  9.0986   3
 -19   4  -1 3.73060 8.13263   4
  19  -4   1 14.8547  6.0428   3
 -20   4  -1 137.356  17.315   4
  20  -4   1 160.550  17.071   3
 -21   4  -1 -1.9375  7.6962   4
 -22   4  -1 5.14157 7.97063   4
 -23   4  -1 2.54421 7.65244   4
  21   3  -1 -2.0995  7.0825   3
  20   3  -1 49.8698  9.3093   3
  19   3  -1 66.6061 10.3911   3
 -19  -3   1 55.9863 12.5325   4
 -18  -3   1 1432.67  173.45   5
  17   3  -1 15.3021  5.7766   2
  17   3  -1 4.32700 6.03557   3
  16   3  -1 83.8150 10.4302   3
  16   3  -1 83.7768 10.0409   2
  15   3  -1 3.74160 3.71367   3
 -15  -3   1 3.85412 4.76487   5
  14   3  -1 7.38624 5.55397   3
 -14  -3   1 12.6563  5.9430   5
  13   3  -1  3.7029 16.5166   3
  13   3  -1 8.26951 7.48111   2
 -13  -3   1 6.45444 7.49745   5
  12   3  -1 2260.32  157.84   2
  12   3  -1 2026.91  165.22   3
 -12  -3   1 2225.44  182.98   5
  11   3  -1 -11.585  12.245   3
  11   3  -1 -5.1224 27.7938   2
 -11  -3   1 15.2192  9.0800   5
  10   3  -1 59.1185 11.1408   3
  10   3  -1 51.9212 16.2969   2
  10   3  -1 59.7432  4.5491   1
 -10  -3   1 59.4728  7.2028   5
   9   3  -1 241.929  18.201   2
   9   3  -1 213.657  18.731   3
   9   3  -1 191.401  15.488   1
  -9  -3   1 241.390  20.821   5
   8   3  -1 133.032  18.359   3
   8   3  -1 117.468  10.672   1
   8   3  -1 138.546  16.161   2
  -8  -3   1 142.446  20.905   5
   7   3  -1 148.853  12.845   1
   7   3  -1 192.148  14.784   2
   7   3  -1 197.202  15.185   3
  -7  -3   1 192.863  20.074   5
  -7  -3   1 181.150  12.881   1
   6   3  -1 49.4476  5.7713   2
   6   3  -1 53.6730  4.1992   1
   6   3  -1 50.2899  7.3043   3
   6   3  -1 47.6944  5.7247   1
  -6  -3   1 53.6298  4.1650   1
  -6  -3   1 50.7550  4.6466   1
  -6  -3   1 55.3726  8.1288   5
   5   3  -1 6.62109 2.07407   1
   5   3  -1 12.0490  4.2824   3
   5   3  -1 4.26249 1.42494   1
   5   3  -1  2.7133 15.1987   5
  -5  -3   1 6.90992 1.82321   1
  -5  -3   1 8.68854 1.50501   1
  -5  -3   1 13.0564  3.3220   5
   4   3  -1 1808.84  138.36   3
   4   3  -1 1772.49  131.73   2
   4   3  -1 1735.16  133.89   5
  -4  -3   1 1868.22  134.09   5
  -4  -3   1 1887.82  170.95   4
  -4  -3   1 1994.85  194.91   3
   3   3  -1 2249.14  163.55   1
  -3  -3   1 2077.68  167.73   1
  -3  -3   1 2661.64  171.33   5
   2   3  -1 235.778  18.426   4
   2   3  -1 227.475  16.840   1
   2   3  -1 237.761  17.554   2
   2   3  -1 254.711  19.505   5
   2   3  -1 225.805  16.498   1
  -2  -3   1 214.135  16.879   1
  -2  -3   1 253.489  18.070   5
  -2  -3   1 211.108  16.533   1
   1   3  -1 127.653  10.258   2
   1   3  -1 115.434   9.311   1
   1   3  -1 145.910  10.220   5
  -1  -3   1 109.851   9.276   1
  -1  -3   1 142.829  10.339   5
   0   3  -1 40.7328  4.9141   4
   0  -3   1 33.3244 13.4204   4
   0  -3   1 52.9760 11.8004   5
   0  -3   1 47.2625  3.8867   1
   0  -3   1 47.4720  7.5987   1
  -1   3  -1 132.555   9.620   1
  -1   3  -1 113.646  10.739   4
   1  -3   1 116.982   8.888   1
  -2   3  -1 180.893  12.347   1
   2  -3   1 144.178  12.690   1
   2  -3   1 169.737  13.236   1
  -3   3  -1 5.99234 1.25079   5
  -3   3  -1 4.55780 1.21369   1
  -3   3  -1 3.75113 1.29857   1
   3  -3   1 -0.0209  2.6596   1
   3  -3   1 3.09358 2.54633   1
  -4   3  -1 43.3028  4.5192   3
  -4   3  -1 38.8299  3.6341   1
  -4   3  -1 42.9588  4.1037   1
   4  -3   1 39.9783 11.7862   3
   4  -3   1 44.0241  3.8817   1
   4  -3   1 39.8481  3.5803   1
  -5   3  -1 40.0170  4.3471   1
  -5   3  -1 50.0179  4.1109   1
  -5   3  -1 51.0680  4.7170   3
  -5   3  -1 45.2877  5.1374   2
   5  -3   1 42.2019  5.7728   3
   5  -3   1 38.0979  3.7324   1
   5  -3   1 44.9586  4.9524   1
  -7   3  -1 104.843   7.602   1
  -7   3  -1 96.0229  7.2858   1
   7  -3   1 109.776  60.245   1
   7  -3   1 89.7118  7.3190   1
   7  -3   1 125.232  19.173   3
  -8   3  -1 191.805  15.614   1
  -8   3  -1 248.579  15.766   1
   8  -3   1 187.469  15.953   1
   8  -3   1 241.450  15.794   1
   8  -3   1 245.157  18.645   3
  -9   3  -1 134.680   9.614   1
   9  -3   1 133.612  10.040   1
   9  -3   1 128.105  12.319   3
 -10   3  -1 1455.81  104.10   1
  10  -3   1 1581.23  103.49   1
  10  -3   1 1496.65  115.83   3
 -11   3  -1 207.835  16.526   5
 -11   3  -1 224.563  15.048   1
  11  -3   1 182.061  18.591   1
  11  -3   1 216.502  15.191   1
  11  -3   1 226.920  18.593   3
 -12   3  -1 25.9972  5.6734   5
  12  -3   1 23.5594 17.6155   3
 -13   3  -1 198.598  15.846   5
  13  -3   1 200.663  20.361   3
 -14   3  -1 543.099  41.886   5
  14  -3   1 571.066  45.065   3
 -15   3  -1 49.8991  5.4084   5
  15  -3   1 33.6616  7.7210   3
 -16   3  -1 50.7520 12.1384   5
  16  -3   1 43.1210  8.9973   3
 -17   3  -1 -0.3327  2.9439   5
  17  -3   1 1.52782 6.56664   3
  18  -3   1 25.1229  6.6263   3
 -19   3  -1 -8.7197  7.4424   4
  19  -3   1 2.55707 7.03999   3
  20  -3   1 78.2461 12.0050   3
 -21   3  -1 9.19018 7.68714   4
  21  -3   1 17.7385  6.2807   3
 -22   3  -1 75.3823 12.9194   4
  22  -3   1 87.4066 12.8304   3
 -23   3  -1 -10.683   8.138   4
  22   2  -1 59.9476 10.5126   3
  21   2  -1 -8.1465  7.0291   3
  20   2  -1 120.770  13.970   3
  19   2  -1 8.73428 7.41013   3
 -19  -2   1 2.23839 5.81917   5
 -19  -2   1 -2.9659  5.6745   4
 -18  -2   1 708.631 126.941   5
  17   2  -1 -0.3214  5.8888   3
  16   2  -1 87.2129 10.7731   2
  16   2  -1 61.7573 10.8867   3
 -16  -2   1 67.5349 10.2030   5
  15   2  -1 14.8920  6.1864   2
  14   2  -1 65.5765 15.5510   2
  14   2  -1 68.8169  9.0126   3
 -14  -2   1 55.7719  9.2278   5
  13   2  -1 179.303  16.213   2
  13   2  -1 172.592  20.282   3
 -13  -2   1 170.584  15.538   5
  12   2  -1 79.9637 23.2813   2
  12   2  -1 68.5545 26.3180   3
 -12  -2   1 79.3012 18.0221   5
  11   2  -1 384.343  31.226   3
  11   2  -1 389.928  30.266   2
 -11  -2   1 383.593  33.523   5
  10   2  -1  5.8000 18.4004   3
  10   2  -1 0.62511 3.73756   2
 -10  -2   1 10.9756  7.8495   5
   9   2  -1 9.15593 7.93068   3
  -9  -2   1 4.24067 4.47402   5
   7   2  -1 553.326  39.586   2
   7   2  -1 476.700  40.042   1
   7   2  -1 547.439  41.346   3
  -7  -2   1 560.856  40.516   5
  -7  -2   1 515.956  36.538   1
   6   2  -1 4608.83  328.50   2
  -6  -2   1 4539.14  336.64   5
   5   2  -1 1519.85  118.70   3
   5   2  -1 1564.52  113.06   2
  -5  -2   1 1681.47  118.86   3
  -5  -2   1 1488.01  114.82   5
  -5  -2   1 1572.61  113.02   2
   4   2  -1 33.8412 25.5600   3
   4   2  -1 39.8063 24.3128   2
   4   2  -1 30.1376  7.0322   1
   4   2  -1 29.6080  8.1239   1
   4   2  -1 31.1721 10.0167   5
  -4  -2   1 23.7500 38.1343   1
  -4  -2   1 35.1765 10.6070   5
  -4  -2   1 29.0773  6.5994   2
  -4  -2   1 36.5368 15.4299   3
  -4  -2   1 31.8608  2.6655   1
   3   2  -1 840.784  64.705   1
   3   2  -1 1016.28   68.46   2
   3   2  -1 1027.50   71.79   3
   3   2  -1 918.198  69.440   5
  -3  -2   1 867.087  68.309   2
  -3  -2   1 854.992  64.729   1
  -3  -2   1 960.251  69.524   5
  -3  -2   1 1073.09   71.81   3
   2   2  -1 181.649  13.714   5
   2   2  -1 178.347  14.473   1
   2   2  -1 189.166  18.842   3
   2   2  -1 159.992  12.621   1
  -2  -2   1 190.600  14.477   2
  -2  -2   1 180.923  13.851   5
  -2  -2   1 170.859  14.224   1
  -2  -2   1 191.192  14.222   4
   1   2  -1 139.651  12.174   1
   1   2  -1 133.520  13.113   2
  -1  -2   1 118.487  13.540   4
  -2   2  -1 232.215  17.474   1
  -2   2  -1 256.512  25.758   3
  -2   2  -1 202.938  21.684   1
   2  -2   1 226.986  19.689   1
   2  -2   1 263.348  22.897   3
  -3   2  -1 303.132  22.370   3
  -3   2  -1 281.251  20.436   1
   3  -2   1 261.097  20.023   1
   3  -2   1 306.338  22.432   3
  -4   2  -1 439.217  32.124   2
  -4   2  -1 485.356  34.041   3
  -4   2  -1 417.270  30.352   1
   4  -2   1 375.754  30.300   1
   4  -2   1 455.992  30.581   1
  -5   2  -1 634.830  44.756   3
  -5   2  -1 568.835  42.303   2
  -5   2  -1 529.482  39.889   1
   5  -2   1 602.203  44.786   3
   5  -2   1 554.225  39.916   1
  -6   2  -1 196.189  13.926   2
  -6   2  -1 169.588  12.536   1
  -6   2  -1 145.923  17.414   1
   6  -2   1 207.107  26.215   3
   6  -2   1 178.711  12.582   1
  -7   2  -1 0.21242 0.78384   1
  -7   2  -1 0.24791 1.08963   1
   7  -2   1 -3.1170  8.9763   3
   7  -2   1 1.13072 2.30041   1
  -8   2  -1 1503.66  128.06   1
  -8   2  -1 1464.18  111.58   1
   8  -2   1 1633.61  107.85   1
   8  -2   1 1687.03  120.51   3
  -9   2  -1 1.28669 1.08655   1
  -9   2  -1 0.88730 1.22611   1
   9  -2   1 -2.8448  9.7139   3
   9  -2   1 0.35649 1.77069   1
 -10   2  -1 52.0500  5.5181   5
 -10   2  -1 61.9323  4.5045   1
  10  -2   1 59.5304  6.5411   1
  10  -2   1 58.8148 12.1316   3
 -11   2  -1 309.006  24.202   5
  11  -2   1 328.189  26.570   3
 -12   2  -1 119.681  10.226   5
  12  -2   1 123.962  17.287   3
 -13   2  -1 293.891  21.804   5
  13  -2   1 263.086  23.991   3
 -14   2  -1 1247.97   89.75   5
  14  -2   1 1176.18   94.10   3
 -15   2  -1 165.898  13.627   5
  15  -2   1 160.302  15.967   3
 -16   2  -1 147.022  12.400   5
  16  -2   1 136.101  14.779   3
 -17   2  -1 177.770  15.299   5
  17  -2   1 188.904  18.210   3
  18  -2   1 21.8213  7.8991   3
  19  -2   1 6.24834 6.66820   3
 -20   2  -1 20.6517  6.8059   4
  20  -2   1 5.09481 5.68740   3
 -21   2  -1 6.84320 6.29082   4
  21  -2   1 -0.1115  7.2425   3
 -22   2  -1 5.42427 6.06596   4
  22  -2   1 -0.2204  8.7611   3
  22   1  -1 22.6622  7.8542   3
  21   1  -1 -7.2017  7.2789   3
  19   1  -1 1.86462 7.14718   3
 -19  -1   1 5.49245 5.23069   5
 -19  -1   1 -8.9027  6.0706   4
 -18  -1   1 67.9285 33.0504   5
 -18  -1   1 55.3798  9.6413   4
 -17  -1   1 -1.7085  4.6870   5
  16   1  -1 58.7710  9.0031   2
  16   1  -1 51.9220  7.8376   3
 -16  -1   1 48.2374  8.2388   5
  15   1  -1 4.51655 6.93513   2
  15   1  -1 3.02741 4.16582   3
 -15  -1   1 3.25199 4.07579   5
  14   1  -1 173.947  15.321   2
  14   1  -1 151.156  15.438   3
 -14  -1   1 163.040  14.250   5
  13   1  -1 137.944  13.719   3
  13   1  -1 149.351  13.480   2
 -13  -1   1 138.377  12.970   5
  12   1  -1  9.7967 24.0119   3
  12   1  -1 11.4374 12.7425   2
 -12  -1   1  7.5615 14.0263   5
  11   1  -1 1766.57  128.02   2
  11   1  -1 1696.48  134.25   3
 -11  -1   1 1808.65  129.60   5
  10   1  -1 10.1973 11.0750   2
  10   1  -1  8.7796 17.0545   3
 -10  -1   1 2.65644 8.62566   5
   9   1  -1 170.279  16.556   2
   9   1  -1 177.354  14.958   3
  -9  -1   1 169.123  14.173   5
   8   1  -1 36.1845  5.6980   3
   7   1  -1 202.844  17.329   3
   7   1  -1 218.545  16.725   2
  -7  -1   1 217.425  16.887   5
   6   1  -1 117.518  18.270   3
   6   1  -1 115.003  16.551   2
  -6  -1   1 128.170  10.371   3
  -6  -1   1 105.635  12.018   5
   5   1  -1 1577.69  121.99   3
   5   1  -1 1594.48  116.12   2
  -5  -1   1 1547.24  117.90   5
  -5  -1   1 1712.10  122.35   3
   4   1  -1 1568.91  117.09   2
   4   1  -1 1513.36  118.15   3
  -4  -1   1 1446.96  114.20   5
  -4  -1   1 1606.81  118.24   3
  -4  -1   1 1624.84  119.39   2
   3   1  -1 17.1875  2.3705   1
   3   1  -1 17.2928  3.1593   3
   3   1  -1 19.7090  2.2744   2
  -3  -1   1 13.8724  2.1410   1
  -3  -1   1 16.8162  8.2403   5
  -3  -1   1 23.0887  2.5661   2
  -3  -1   1 18.0778  1.5356   1
   2   1  -1 59.8612 22.6873   2
   2   1  -1 60.7343 23.0261   3
   2   1  -1 51.0947  3.7736   1
  -2  -1   1 50.7882 10.8157   5
  -2  -1   1 46.0386  3.7584   1
  -2  -1   1 43.3957  6.1281   1
  -2  -1   1 51.5144  4.6158   2
  -2  -1   1 55.4303 17.8657   3
  -3   1  -1 152.032  10.861   2
  -3   1  -1 153.379  11.519   3
  -3   1  -1 145.068  10.525   1
  -3   1  -1 123.436  10.106   1
   3  -1   1 137.469  12.994   1
   3  -1   1 135.569  10.164   1
   3  -1   1 161.354  11.690   3
  -4   1  -1 21.7818  2.4928   1
  -4   1  -1 21.9662  3.4018   2
  -4   1  -1 21.4591  2.9587   1
   4  -1   1 21.6419  2.8910   1
  -5   1  -1 117.264   8.994   2
  -5   1  -1 92.5591  8.2004   1
  -5   1  -1 131.035   9.636   3
   5  -1   1 108.980   8.989   1
  -6   1  -1 1475.38  101.90   5
  -6   1  -1 1482.15  117.56   1
   6  -1   1 1382.38  105.95   3
   6  -1   1 1248.17   99.34   1
  -7   1  -1 135.729  10.360   5
  -7   1  -1 122.182   9.364   1
   7  -1   1 140.582  11.766   3
   7  -1   1 124.742   9.746   1
  -8   1  -1 478.835  33.928   5
  -8   1  -1 443.777  31.279   1
   8  -1   1 432.708  31.264   1
   8  -1   1 466.674  40.978   3
  -9   1  -1 137.296  10.349   1
  -9   1  -1 165.038  11.771   5
   9  -1   1 122.661  12.680   1
   9  -1   1 146.322  10.469   1
   9  -1   1 162.173  13.379   3
 -10   1  -1 597.126  42.391   5
  10  -1   1 535.790  44.668   3
 -11   1  -1 571.155  41.630   5
  11  -1   1 538.604  44.086   3
 -12   1  -1 445.845  34.110   5
  12  -1   1 454.195  36.662   3
 -13   1  -1 142.985  11.802   5
  13  -1   1 135.390  14.013   3
 -14   1  -1 148.291  20.577   5
  14  -1   1 148.158  14.685   3
  15  -1   1 6.94835 5.79738   3
 -16   1  -1 32.3825  5.6968   5
  16  -1   1 39.8242 10.6426   3
 -17   1  -1 178.637  15.499   5
  17  -1   1 186.016  17.991   3
  18  -1   1 83.6540 10.9197   3
  19  -1   1 43.9481  7.8593   3
 -20   1  -1 4.27000 6.92356   4
 -21   1  -1 -11.977   7.490   4
  21  -1   1 0.01063 6.99206   3
 -22   1  -1 68.6212 12.0254   4
  22   0  -1 6.92997 7.45745   3
  21   0  -1 -5.6573  7.0796   3
 -21   0   1 3.25931 5.80386   4
  20   0  -1 -1.7447  7.3107   3
 -20   0   1 1.78953 6.23838   4
  19   0  -1 55.9920  9.1942   3
 -19   0   1 49.6515  8.9892   4
  18   0  -1 5.15021 5.19226   3
 -18   0   1 -3.5974  5.7480   4
 -18   0   1 8.74813 4.24014   5
  17   0  -1 35.6418  7.5317   3
 -17   0   1 33.1691  7.2906   4
 -17   0   1 35.3514  6.1750   5
  16   0  -1 16.6315  6.3337   3
 -16   0   1 3.26478 4.53782   5
  15   0  -1 88.0068 10.8396   3
  15   0  -1 86.3600 10.8894   2
 -15   0   1 99.1395  9.3548   5
  14   0  -1 149.613  14.648   2
  14   0  -1 133.660  13.345   3
 -14   0   1 135.802  12.395   5
  13   0  -1 32.2060  6.5515   2
  13   0  -1 32.6716  8.4571   3
 -13   0   1 24.4417  4.3335   5
  12   0  -1 740.513  55.486   2
  12   0  -1 737.663  66.358   3
 -12   0   1 732.714  55.694   5
  11   0  -1 607.777  46.813   2
  11   0  -1 617.032  48.928   3
 -11   0   1 638.642  46.813   5
  10   0  -1 473.949  38.771   3
  10   0  -1 468.529  41.983   2
 -10   0   1 488.486  36.243   5
   9   0  -1 138.600  12.210   3
   9   0  -1 130.937  11.794   2
  -9   0   1 131.866  11.123   5
   8   0  -1 442.258  35.908   3
   8   0  -1 477.290  34.478   2
  -8   0   1 453.986  34.384   5
   7   0  -1 271.300  22.280   3
   7   0  -1 285.397  21.428   2
   6   0  -1 104.162   9.335   2
   6   0  -1 113.543  11.385   3
  -6   0   1 117.721  10.752   3
   5   0  -1 21.6446  3.4233   3
   5   0  -1 16.9051  3.0760   2
  -5   0   1 23.8968  2.9315   2
  -5   0   1 17.7712  2.7267   3
   4   0  -1 964.135  78.557   3
   4   0  -1 997.218  71.036   2
  -4   0   1 982.343  70.982   2
   3   0  -1 18.1039  6.5829   2
   3   0  -1 17.4625 11.0948   3
  -3   0   1 19.0557  3.4175   3
  -3   0   1 20.2065  2.8042   2
  -3   0  -1 323.506  25.222   2
  -3   0  -1 302.646  23.993   1
  -3   0  -1 379.380  25.482   5
   3   0   1 368.293  26.709   3
   3   0   1 334.850  25.416   5
  -4   0  -1 157.195  12.371   2
  -4   0  -1 188.090  16.368   3
   4   0   1 132.447  11.527   1
   4   0   1 172.228  12.332   2
  -5   0  -1 3487.60  250.85   3
   5   0   1 3118.71  237.08   2
  -6   0  -1 3345.51  233.99   5
   6   0   1 3067.10  228.65   2
   6   0   1 3132.27  240.61   3
  -7   0  -1 15.9472  2.6516   1
  -7   0  -1 18.6539  2.5773   1
   7   0   1 32.1437  8.5511   3
   7   0   1 21.4175  3.5740   1
  -9   0  -1 821.575  58.322   5
   9   0   1 751.094  60.868   3
 -10   0  -1 703.980  51.510   5
  10   0   1 675.456  54.763   2
  10   0   1 691.893  57.988   3
 -11   0  -1 252.474  19.445   5
  11   0   1 241.367  21.067   3
 -12   0  -1 108.221  12.877   5
  12   0   1 120.821  27.508   3
 -13   0  -1 25.2671  6.8013   5
  13   0   1 27.4794 10.0010   3
 -14   0  -1 586.074  45.361   5
  14   0   1 610.577  48.989   3
 -15   0  -1 17.3891  4.2468   5
  15   0   1 16.5258  4.8214   3
 -16   0  -1 137.925  13.053   5
  16   0   1 163.733  15.186   3
  17   0   1 0.75941 8.09576   3
  19   0   1 -2.1878  6.7911   3
  20   0   1 17.9363  7.6215   3
 -21   0  -1 3.23652 6.45438   4
  21   0   1 8.67968 7.46696   3
 -22   0  -1 31.3246  7.9055   4
  22  -1  -1 147.410  15.652   3
 -22   1   1 99.6944 15.0298   4
  21  -1  -1 3.13414 7.17695   3
 -21   1   1 -2.1728  6.2045   4
  20  -1  -1 116.347  13.508   3
 -20   1   1 92.8843 13.1212   4
  19  -1  -1 -5.7694  5.2361   3
  18  -1  -1 65.4826  9.7733   3
 -18   1   1 53.1852  7.0884   5
 -18   1   1 44.5944 10.5211   4
  17  -1  -1 15.5866  7.0220   3
 -17   1   1 11.2605  5.6514   4
  16  -1  -1 91.4823 11.0881   3
 -16   1   1 67.8074 11.8243   4
 -16   1   1 87.5096  8.7720   5
  15  -1  -1 158.272  15.658   3
  15  -1  -1 145.223  14.506   2
 -15   1   1 171.138  13.991   5
  14  -1  -1 514.878  41.782   3
  14  -1  -1 482.421  39.863   2
 -14   1   1 548.193  39.600   5
  13  -1  -1 12.9599  5.7503   2
 -13   1   1 22.5295  4.0530   5
  12  -1  -1 691.487  56.168   3
  12  -1  -1 643.903  51.500   2
 -12   1   1 716.240  51.490   5
  11  -1  -1 139.202  12.984   2
  11  -1  -1 148.921  13.563   3
 -11   1   1 141.360  12.012   5
  10  -1  -1 108.158  12.637   3
  10  -1  -1 103.193  13.993   2
   9  -1  -1 22.4827  4.5008   3
   8  -1  -1 50.9013 14.6624   2
   8  -1  -1 46.6649 17.5856   3
   7  -1  -1 1267.58   89.49   2
   7  -1  -1 1197.04   94.00   3
   6  -1  -1 83.6585 21.3452   3
   6  -1  -1 91.6760 13.7779   2
  -6   1   1 94.0497  8.0095   2
   5  -1  -1 333.822  26.738   3
   5  -1  -1 337.330  25.486   2
  -5   1   1 343.593  26.769   3
  -5   1   1 339.227  25.394   2
   4  -1  -1 209.162  16.884   3
   4  -1  -1 195.490  13.935   1
   4  -1  -1 204.232  15.261   2
  -4   1   1 206.283  16.435   3
  -4   1   1 192.623  13.924   1
  -4   1   1 199.971  13.939   1
  -4   1   1 201.885  15.281   2
   3  -1  -1 179.849  14.263   2
   3  -1  -1 187.648  13.664   1
   3  -1  -1 191.581  15.576   3
  -3   1   1 195.991  15.232   3
  -3   1   1 197.117  13.304   1
  -3   1   1 190.952  13.267   1
  -3   1   1 186.206  20.534   4
  -3   1   1 187.898  14.257   2
  -2  -1  -1 47.4926  8.3287   5
  -2  -1  -1 49.4002  4.8747   1
  -2  -1  -1 29.2586  7.2940   3
   2   1   1 41.8928  3.7232   2
   2   1   1 36.2146  3.7017   5
  -3  -1  -1 546.511  47.431   1
  -3  -1  -1 611.952  46.269   2
   3   1   1 714.586  46.392   2
   3   1   1 742.204  47.020   5
   3   1   1 542.162  47.062   1
  -5  -1  -1 1751.69  207.31   1
  -5  -1  -1 2150.68  156.61   2
  -5  -1  -1 1860.12  185.66   1
   5   1   1 2498.26  154.36   2
   5   1   1 1931.46  178.72   1
   5   1   1 2329.63  156.56   5
  -6  -1  -1 42.1011  5.3022   1
  -6  -1  -1 53.0057  4.1733   1
   6   1   1 62.7449 12.5258   3
   6   1   1 74.9082 11.1507   2
   6   1   1 38.3840  8.8766   1
  -7  -1  -1 71.2652  5.1493   1
  -7  -1  -1 66.4958  5.2027   1
   7   1   1 68.3078  5.2015   1
  -8  -1  -1 948.829  67.072   5
   8   1   1 867.506  67.125   2
   8   1   1 899.156  69.755   3
  -9  -1  -1 108.213   8.329   1
  -9  -1  -1 116.898   8.570   1
   9   1   1 110.521   7.760   1
   9   1   1 88.8931  7.5398   1
 -10  -1  -1 1368.23   97.37   5
  10   1   1 1298.10  101.11   3
  10   1   1 1286.93   96.26   2
 -11  -1  -1 186.998  15.924   5
  11   1   1 178.033  17.759   3
  11   1   1 198.760  16.416   2
 -12  -1  -1 1999.00  155.07   5
  12   1   1 1873.70  147.67   3
 -13  -1  -1 5.54327 5.55187   5
  13   1   1 -2.0794  5.8711   3
 -14  -1  -1 341.842  27.391   5
  14   1   1 353.544  34.593   3
 -15  -1  -1 -1.4030  3.5720   5
  15   1   1 1.96657 5.80473   3
 -16  -1  -1 45.0296  9.4421   5
  16   1   1 49.3769 15.0983   3
 -17  -1  -1 -3.9940  4.0376   5
 -18  -1  -1 707.661  69.953   5
  20   1   1 91.0606 12.0281   3
 -21  -1  -1 -1.6591  6.2459   4
  21   1   1 1.72384 6.87812   3
  22   1   1 45.1552  9.9666   3
 -22   2   1 -5.0158  7.1454   4
  21  -2  -1 -7.2944  7.8930   3
 -21   2   1 11.9284  6.9514   4
  20  -2  -1 155.230  15.527   3
 -20   2   1 132.769  16.394   4
  19  -2  -1 6.35857 6.73126   3
 -19   2   1 6.73731 6.58845   4
 -18   2   1 28.1181  5.1122   5
 -18   2   1 19.1826  8.9497   4
  17  -2  -1 26.8649  7.9900   3
 -17   2   1 34.2987  5.4473   5
 -17   2   1 35.8522  6.9429   4
  16  -2  -1 305.701  28.935   3
 -16   2   1 325.703  25.173   5
 -16   2   1 308.696  28.443   4
  15  -2  -1 -0.4344  5.4253   3
 -15   2   1 -5.5974  3.9369   5
  14  -2  -1 67.4433  8.7984   2
  14  -2  -1 95.9568 11.9471   3
 -14   2   1 79.0262  9.5932   4
 -14   2   1 90.5244  8.2960   5
  13  -2  -1 61.9766  9.0346   2
  13  -2  -1 68.7597  9.1991   3
 -13   2   1 83.8383  7.3925   5
  12  -2  -1 123.188  14.703   3
  12  -2  -1 100.833  24.571   2
  11  -2  -1 775.375  61.186   3
  11  -2  -1 793.977  58.378   2
  10  -2  -1 769.805  58.678   3
  10  -2  -1 735.863  55.704   2
   9  -2  -1 84.7053  8.1534   3
   9  -2  -1 81.1135  8.0951   2
   8  -2  -1 418.829  32.301   3
   8  -2  -1 392.982  30.581   2
   7  -2  -1 119.266  11.421   2
   7  -2  -1 125.751   9.062   1
   7  -2  -1 121.740  10.779   3
  -7   2   1 125.541   8.686   1
   6  -2  -1 3014.33  221.37   2
   6  -2  -1 3194.20  233.11   3
  -6   2   1 3032.62  222.84   2
   5  -2  -1 -0.0289  6.5300   3
   5  -2  -1 4.19626 2.43169   1
  -5   2   1 2.80730 1.33308   2
  -5   2   1 6.53684 2.02487   3
  -5   2   1 2.99986 0.83113   1
  -5   2   1 2.90912 2.76545   4
   4  -2  -1 465.264  36.121   2
   4  -2  -1 486.023  33.630   1
   4  -2  -1 415.246  33.552   1
  -4   2   1 489.365  33.601   1
  -4   2   1 490.217  35.602   2
  -4   2   1 489.987  33.602   1
  -4   2   1 541.054  37.785   3
   3  -2  -1 6.85846 1.23855   1
   3  -2  -1 6.76113 2.56806   1
   3  -2  -1 6.05973 1.26408   2
   3  -2  -1 5.23140 2.16503   4
  -3   2   1 8.95298 2.98731   4
  -3   2   1 9.83898 1.82746   1
  -3   2   1 7.30082 1.38130   2
  -3   2   1 6.53263 1.20346   1
   2  -2  -1 218.297 157.581   4
   2  -2  -1 191.020 258.635   1
   2  -2  -1 180.711  49.868   2
   2  -2  -1 197.947 196.437   1
  -2   2   1 207.489 192.245   1
  -2   2   1 193.495  63.208   2
  -2   2   1 199.891 233.091   1
  -1  -2  -1 -4.0473  2.0601   2
  -1  -2  -1 -5.7963  2.3418   1
  -1  -2  -1 -5.4153  6.4326   5
   1   2   1 -4.9549  2.6250   5
   1   2   1 -1.8133  3.9076   1
   1   2   1 -2.2800  3.1408   2
   1   2   1 -9.5014  9.7958   4
   1   2   1 -5.8675  2.7438   1
  -2  -2  -1 53.9456  5.6677   5
  -2  -2  -1 38.7050 13.1116   2
  -2  -2  -1 43.3138 34.0058   1
   2   2   1 71.0604 43.5137   5
   2   2   1 40.9721  3.7773   2
   2   2   1 121.997  71.787   4
  -3  -2  -1 313.089  23.111   4
  -3  -2  -1 322.137  21.867   5
  -3  -2  -1 270.408  20.199   1
  -3  -2  -1 263.998  20.141   1
  -3  -2  -1 250.075  21.248   2
   3   2   1 259.554  20.146   1
   3   2   1 293.919  20.262   1
   3   2   1 325.608  21.795   5
   3   2   1 301.999  22.478   3
  -5  -2  -1 356.761  24.496   1
  -5  -2  -1 314.674  24.912   1
  -5  -2  -1 341.470  26.158   2
   5   2   1 330.674  24.494   1
   5   2   1 338.668  26.184   2
   5   2   1 349.888  24.552   1
   5   2   1 404.360  27.739   3
   5   2   1 379.432  26.449   5
  -6  -2  -1 13.5294  2.8974   1
  -6  -2  -1 17.2563  2.2994   1
  -6  -2  -1 23.7481 12.1599   5
   6   2   1 15.9515  1.9972   1
   6   2   1 18.1618  2.2912   1
   6   2   1 19.0900  7.0707   5
   6   2   1 18.0552 14.1361   3
  -7  -2  -1 602.011  63.273   1
  -7  -2  -1 615.880  50.468   1
   7   2   1 779.320  51.802   3
   7   2   1 579.182  53.103   1
   7   2   1 644.656  49.508   1
   7   2   1 724.484  49.206   2
  -8  -2  -1 1339.58   92.26   5
  -8  -2  -1 1114.62  106.55   1
   8   2   1 1240.13   95.54   3
   8   2   1 1255.46   90.95   2
  -9  -2  -1 -1.2388  5.7349   5
  -9  -2  -1 0.03394 1.76353   1
   9   2   1  5.0322 13.1397   3
   9   2   1 1.17306 4.12553   2
   9   2   1 3.02370 1.88802   1
 -10  -2  -1 2135.49  161.07   5
  10   2   1 1986.61  157.06   3
  10   2   1 2070.56  149.61   2
 -11  -2  -1 718.535  51.696   5
  11   2   1 703.235  51.385   2
  11   2   1 629.909  48.675   1
  11   2   1 682.692  53.591   3
 -12  -2  -1 387.771  31.617   5
  12   2   1 420.021  39.415   2
  12   2   1 417.718  34.075   3
 -13  -2  -1 160.788  15.009   5
  13   2   1 177.555  16.128   3
  14   2   1 10.4425 14.0402   3
 -15  -2  -1 4.79911 4.26423   5
  15   2   1 2.02889 4.03599   3
 -16  -2  -1 2.64504 4.23256   5
 -17  -2  -1 17.2416  5.0319   5
  17   2   1 13.5394  6.4597   3
 -18  -2  -1 46.2997  8.1554   5
  19   2   1 68.0320 10.6081   3
  20   2   1 45.4601  8.9676   3
  21   2   1 5.28970 6.77079   3
  22   2   1 45.7437  9.7237   3
 -22   3   1 135.189  16.630   4
 -21   3   1 12.1001  7.3839   4
 -20   3   1 232.176  22.589   4
  19  -3  -1 13.7531  7.3276   3
 -19   3   1 5.64234 6.47533   4
  18  -3  -1 81.1825 11.6111   3
 -18   3   1 74.3466 13.8128   4
 -18   3   1 80.5778  8.5946   5
  17  -3  -1 50.3039  9.2234   3
 -17   3   1 41.5547  8.4007   4
 -17   3   1 55.5649  6.5147   5
  16  -3  -1 319.602  28.377   3
 -16   3   1 327.958  30.546   4
 -16   3   1 322.943  25.676   5
  15  -3  -1 96.0385 10.6539   3
 -15   3   1 101.003   9.145   5
 -15   3   1 88.6135 11.2435   4
  14  -3  -1 17.8498 11.4442   3
 -14   3   1 22.3961 11.3693   4
  13  -3  -1 23.4420 22.2136   3
 -13   3   1 20.4052  8.6730   4
  12  -3  -1 2187.83  176.54   2
  12  -3  -1 2471.08  184.30   3
 -12   3   1 2582.63  190.68   4
  11  -3  -1 746.883  59.429   2
  11  -3  -1 836.443  62.884   3
 -11   3   1 830.413  64.912   4
  10  -3  -1  4.6538 22.2415   3
  10  -3  -1 14.0614 10.2424   2
   9  -3  -1 139.873  12.224   3
   9  -3  -1 138.230  11.466   2
   9  -3  -1 138.724   9.721   1
  -9   3   1 158.751  13.478   4
  -9   3   1 134.766   9.648   1
  -9   3   1 114.254   9.604   1
   8  -3  -1 722.576  48.846   1
   8  -3  -1 694.249  53.060   2
   8  -3  -1 737.232  55.716   3
  -8   3   1 668.377  49.378   1
  -8   3   1 752.607  64.714   4
  -8   3   1 697.663  48.779   1
   7  -3  -1 523.701  41.956   2
   7  -3  -1 589.260  39.427   1
   7  -3  -1 597.127  44.501   3
  -7   3   1 540.601  39.331   1
  -7   3   1 590.120  45.981   4
  -7   3   1 588.529  39.374   1
   6  -3  -1 4344.00  311.71   2
   5  -3  -1 0.10307 2.50006   1
   5  -3  -1 -0.6665  2.0802   2
   5  -3  -1 -0.9612  2.1614   1
  -5   3   1 -3.3971  3.0099   4
  -4   3   1 56.7315  5.8609   2
   3  -3  -1 697.101  49.239   4
   3  -3  -1 555.836  60.956   2
   3  -3  -1 591.477  42.480   1
   3  -3  -1 569.231  42.477   1
  -3   3   1 578.268  42.448   1
  -3   3   1 566.445  44.436   2
  -3   3   1 700.353  49.215   4
  -3   3   1 639.425  42.512   1
   2  -3  -1 224.893  21.140   4
   2  -3  -1 219.663  59.611   1
   2  -3  -1 265.785  18.524   1
  -2   3   1 279.510  18.580   1
  -2   3   1 275.892  18.529   1
   1  -3  -1 -8.6405  2.3404   1
   1  -3  -1 -13.872   6.218   5
   1  -3  -1 -9.8301  3.8488   4
  -1   3   1 -8.1031 22.9484   4
  -1   3   1 -11.098  10.024   1
  -1   3   1 -5.9299  3.4632   5
  -1   3   1 -8.0502  1.8422   1
   0  -3  -1 -5.2114  6.1198   1
   0  -3  -1 -5.9936  5.9944   2
   0  -3  -1 -4.7324  8.6390   1
   0  -3  -1 -1.2943 30.7846   4
   0   3   1 -6.0681  8.9821   1
   0   3   1 -4.4359  3.7486   2
   0   3   1 -3.2534 11.0934   1
   0   3   1 -1.1905  5.2690   5
   0   3   1  -8.556 189.806   4
  -1  -3  -1 34.6900 21.2637   1
  -1  -3  -1  39.089 110.980   1
  -1  -3  -1 44.3605  6.3764   4
  -1  -3  -1 45.6206  8.1955   5
   1   3   1 34.4610  5.3913   1
   1   3   1 35.9888  3.5538   1
   1   3   1 29.6983  4.9239   4
  -2  -3  -1 275.981 623.557   4
  -2  -3  -1 246.285  55.585   1
  -2  -3  -1 242.069  25.984   1
   2   3   1 298.064  50.460   5
   2   3   1 272.233 750.723   4
   2   3   1 258.753 132.641   1
  -3  -3  -1 341.055  24.441   1
  -3  -3  -1 328.360  25.643   2
  -3  -3  -1 288.960  31.262   4
  -3  -3  -1 337.031  25.667   1
  -3  -3  -1 389.049  26.517   5
   3   3   1 352.674  24.442   1
   3   3   1 342.639  24.786   1
   3   3   1 405.122  27.632   3
  -4  -3  -1 709.914  54.286   4
  -4  -3  -1 673.301  47.548   1
  -4  -3  -1 626.075  49.999   2
  -4  -3  -1 767.069  51.210   5
  -4  -3  -1 652.476  47.446   1
   4   3   1 689.599  47.563   1
   4   3   1 618.096  47.438   1
   4   3   1 736.862  51.030   5
   4   3   1 716.277  53.207   3
   4   3   1 690.477  50.758   2
  -5  -3  -1 19.5017  3.4765   1
  -5  -3  -1 21.4773  3.8880   5
  -5  -3  -1 20.5339  2.8010   4
  -5  -3  -1 13.9926  8.9838   1
   5   3   1 22.3069  3.1280   5
   5   3   1 16.9346  7.6376   3
   5   3   1 18.4081  4.1737   1
   5   3   1 21.1311  9.5361   2
   5   3   1 19.3733  7.5661   1
  -6  -3  -1 1462.43   98.98   5
   6   3   1 1368.77   97.20   2
   6   3   1 1346.67  102.25   3
   6   3   1 1179.07   94.13   1
  -7  -3  -1 469.856  31.244   5
  -7  -3  -1 353.385  30.172   1
   7   3   1 430.555  30.635   2
   7   3   1 434.564  32.665   3
   7   3   1 387.538  28.393   1
   7   3   1 356.993  28.250   1
  -8  -3  -1 58.3008 15.1929   5
  -8  -3  -1 48.3034  4.2581   1
   8   3   1 41.0301  5.6386   1
   8   3   1 41.0438  4.7801   1
   8   3   1 63.4255  9.4150   2
   8   3   1 45.4473 23.7734   3
  -9  -3  -1 383.915  33.267   5
  -9  -3  -1 366.556  27.111   1
   9   3   1 318.960  25.340   1
   9   3   1 371.665  29.532   3
   9   3   1 380.481  28.073   2
 -10  -3  -1 921.048  70.215   5
  10   3   1 916.874  75.296   3
  10   3   1 976.729  69.628   2
 -11  -3  -1 6.01431 5.43024   5
  11   3   1 17.6287 12.1752   3
 -12  -3  -1 1918.44  172.52   5
  12   3   1 1915.13  150.37   3
  12   3   1 2043.02  143.70   1
  12   3   1 1983.01  143.34   2
 -13  -3  -1 935.175  83.507   5
  13   3   1 933.629  76.060   3
  13   3   1 1057.48   73.12   2
 -14  -3  -1 584.871  46.913   5
  14   3   1 586.290  46.897   3
 -15  -3  -1 -6.3901  6.7253   5
  15   3   1 0.91616 7.59139   3
 -16  -3  -1 5.40581 4.71217   5
  16   3   1 4.64538 6.06659   3
 -17  -3  -1 1.63291 7.94099   5
 -18  -3  -1 5.07036 5.60338   5
  18   3   1 1.89199 5.87510   3
  20   3   1 4.82758 6.66007   3
  21   3   1 10.6396  9.7858   3
 -23   4   1 1.76675 6.47012   4
 -22   4   1 91.0095 13.4150   4
 -21   4   1 -2.9449  7.1469   4
 -20   4   1 132.355  15.778   4
 -19   4   1 23.1659  6.5261   4
 -18   4   1 459.022  44.075   4
 -18   4   1 566.430  39.910   5
 -17   4   1 44.7262  5.8642   5
 -17   4   1 37.4947  8.8326   4
 -16   4   1 1045.95   86.65   4
 -16   4   1 1088.42   79.67   5
  15  -4  -1 8.63279 6.49159   3
 -15   4   1 5.79305 6.43831   4
  14  -4  -1 430.928  36.108   3
 -14   4   1 442.382  37.260   4
  13  -4  -1 227.309  33.996   3
 -13   4   1 213.638  21.384   4
  12  -4  -1 2405.16  184.58   3
 -12   4   1 2432.50  190.76   4
  11  -4  -1 136.603  12.693   1
  11  -4  -1 175.090  26.507   3
  11  -4  -1 156.415  11.142   1
 -11   4   1 153.238  10.950   1
 -11   4   1 162.002  14.567   4
  10  -4  -1 1738.76  122.08   1
 -10   4   1 1692.44  122.37   1
 -10   4   1 1857.90  139.38   4
   9  -4  -1 274.092  19.007   1
   9  -4  -1 248.986  21.331   2
  -9   4   1 273.428  23.035   4
  -9   4   1 271.798  18.834   1
   8  -4  -1 2042.37  136.14   1
   8  -4  -1 1895.20  143.59   2
  -8   4   1 2009.83  156.53   4
  -8   4   1 2010.77  136.06   1
   7  -4  -1 380.823  26.516   1
   7  -4  -1 349.922  25.526   1
   7  -4  -1 340.838  27.298   2
  -7   4   1 370.338 149.034   4
  -7   4   1 378.799  25.559   1
  -7   4   1 376.572  25.552   1
   5  -4  -1 92.4375 22.5519   1
   5  -4  -1 101.237  20.881   1
  -5   4   1 100.684   7.252   1
  -5   4   1 93.0767  7.2373   1
  -5   4   1 91.5257 12.3526   3
  -5   4   1 90.4706  7.5007   2
  -5   4   1 90.8659 74.3274   4
   3  -4  -1 575.551  42.621   4
   3  -4  -1 499.384  40.663   1
   3  -4  -1 483.691  71.453   1
  -3   4   1 550.346  53.100   4
  -3   4   1 506.946  36.943   1
  -3   4   1 503.539  36.613   1
   2  -4  -1 112.375  17.575   5
   2  -4  -1 76.4627 33.3458   1
  -2   4   1 118.786  82.715   5
  -2   4   1 136.784  48.028   1
   1  -4  -1 42.5469  4.4970   4
   1  -4  -1 40.0894  3.9548   1
   1  -4  -1 43.9185  6.4596   1
   1  -4  -1 60.5111  9.3816   5
  -1   4   1 42.7949  4.3194   1
  -1   4   1 36.4778  3.8367   1
   0  -4  -1 559.997  43.278   4
   0  -4  -1 520.630  45.050   1
   0  -4  -1 567.472  48.204   5
   0  -4  -1 487.448  46.238   1
   0   4   1 523.945  37.906   1
   0   4   1 620.325  50.413   5
  -1  -4  -1 19.6222  4.5313   4
  -1  -4  -1 23.0396 13.0202   1
  -1  -4  -1 10.9822  6.4596   2
  -1  -4  -1 29.6313 13.8268   5
  -1  -4  -1 28.8438 13.1124   1
   1   4   1 27.6922  3.4552   5
   1   4   1 29.1194  7.1474   4
   1   4   1 23.6071  5.0149   1
   1   4   1 24.0476  5.8363   1
  -2  -4  -1 1213.79   87.49   5
  -2  -4  -1 1168.91   81.67   1
  -2  -4  -1 1085.24   96.57   4
   2   4   1 1282.80   87.35   5
   2   4   1 1078.54   81.60   1
   2   4   1 1283.97   93.37   4
  -3  -4  -1 566.691  45.904   2
  -3  -4  -1 632.140  51.346   4
  -3  -4  -1 556.712  43.727   1
  -3  -4  -1 667.673  47.265   5
   3   4   1 643.920  45.974   2
   3   4   1 723.336  49.990   4
  -4  -4  -1 817.127  61.766   4
  -4  -4  -1 740.047  56.715   2
  -4  -4  -1 803.779  58.119   5
  -4  -4  -1 756.039  53.982   1
   4   4   1 811.064  60.048   3
   4   4   1 765.280  54.014   1
   4   4   1 770.265  56.775   2
  -5  -4  -1 721.925  52.941   1
  -5  -4  -1 792.966  56.313   5
   5   4   1 729.994  52.083   1
   5   4   1 770.725  57.870   3
   5   4   1 747.271  55.013   2
   5   4   1 754.388  52.203   1
  -6  -4  -1 909.583  65.217   5
  -6  -4  -1 906.334  83.949   4
   6   4   1 824.920  60.441   1
   6   4   1 899.771  67.234   3
   6   4   1 872.677  64.329   2
   6   4   1 838.802  60.369   1
  -7  -4  -1 0.88643 5.61762   5
  -7  -4  -1 1.06201 4.41376   1
   7   4   1 -1.1056  4.3707   1
   7   4   1 -5.8619 10.8653   3
   7   4   1 -2.9828  3.3160   1
   7   4   1 -6.6234  7.6189   2
  -8  -4  -1 3269.40  264.98   5
  -8  -4  -1 2782.45  305.58   1
   8   4   1 3372.43  229.94   2
   8   4   1 3341.70  241.76   3
   8   4   1 2968.86  250.93   1
  -9  -4  -1 659.831  49.533   5
   9   4   1 581.206  45.570   1
   9   4   1 697.739  48.833   2
   9   4   1 670.494  58.762   3
   9   4   1 654.429  45.408   1
 -10  -4  -1 610.538  78.805   1
 -10  -4  -1 744.204  56.835   5
  10   4   1 810.560  63.583   3
  10   4   1 746.025  56.140   2
  10   4   1 706.647  56.225   1
  10   4   1 820.420  52.103   1
 -11  -4  -1 257.102  22.192   5
  11   4   1 282.106  19.689   1
  11   4   1 261.632  29.014   3
  11   4   1 275.699  21.975   2
 -12  -4  -1 970.355 197.439   1
 -12  -4  -1 1290.02  107.32   5
  12   4   1 1512.97  100.24   2
  12   4   1 1370.52  104.70   3
 -13  -4  -1 365.096  29.391   5
  13   4   1 368.865  30.499   3
 -14  -4  -1 235.128  19.890   5
  14   4   1 239.242  20.702   3
 -15  -4  -1 41.0195  9.5167   5
  15   4   1 58.6274  8.2282   3
 -16  -4  -1 34.7781 13.0715   5
  16   4   1 49.9836  8.1632   3
 -17  -4  -1 2.88162 5.09153   5
  17   4   1 -0.3044  5.0008   3
 -18  -4  -1 147.982  14.460   5
  18   4   1 142.094  15.255   3
  19   4   1 7.98855 6.81327   3
  21   4   1 6.86720 6.94129   3
 -23   5   1 14.1711  9.2243   4
 -22   5   1 -8.1160  7.5906   4
 -21   5   1 -2.7970  7.0555   4
 -20   5   1 217.070  22.383   4
 -19   5   1 64.3038 10.4478   4
 -18   5   1 300.944  28.170   4
 -17   5   1 99.6706  9.2647   5
 -17   5   1 86.6876 12.1226   4
 -16   5   1 1147.19   92.97   4
 -15   5   1 -5.4717  4.4612   4
 -14   5   1 14.5765 10.9388   4
  13  -5  -1 28.8024  2.9682   1
 -13   5   1 26.2479  2.4211   1
 -13   5   1 23.4377  7.1388   4
  12  -5  -1 104.375   8.168   1
 -12   5   1 125.008  23.692   4
 -12   5   1 100.693   7.731   1
  11  -5  -1 283.474  20.799   1
 -11   5   1 281.384  20.333   1
 -11   5   1 306.320  29.062   4
  10  -5  -1 59.2561  7.1799   1
  10  -5  -1 58.8407  8.4345   1
 -10   5   1 67.8499  5.2582   1
   9  -5  -1 196.857  16.089   1
   9  -5  -1 232.540  16.598   1
  -9   5   1 232.870  16.136   1
  -9   5   1 245.339  26.302   4
   8  -5  -1 2772.21  191.63   1
  -8   5   1 2770.65  191.53   1
  -8   5   1 2863.74  220.03   4
   7  -5  -1 45.2475  4.9599   1
   7  -5  -1 50.0474  7.4698   1
  -7   5   1 53.8215  6.6130   4
  -7   5   1 53.8546  4.4802   1
   6  -5  -1 343.142  24.444   1
   6  -5  -1 359.676  25.177   1
  -6   5   1 358.388  24.462   1
  -6   5   1 300.542  25.481   2
  -6   5   1 372.025  31.159   4
   5  -5  -1 544.758  42.545   1
   5  -5  -1 638.249  42.992   1
  -5   5   1 621.547  42.634   1
  -5   5   1 585.075  44.514   2
  -5   5   1 681.437  51.951   4
   4  -5  -1 2280.80  163.74   1
   4  -5  -1 2301.34  163.81   1
   4  -5  -1 2701.21  187.74   4
  -4   5   1 2216.28  171.64   2
  -4   5   1 2270.70  163.70   1
  -4   5   1 2586.64  188.66   4
   3  -5  -1 1321.73   97.97   4
   3  -5  -1 1211.21   86.25   1
  -3   5   1 1230.78   85.46   1
  -3   5   1 1122.24   89.17   2
  -3   5   1 1261.46   85.46   1
   2  -5  -1 -4.9434  7.6812   5
   2  -5  -1 -3.1088  2.0175   1
   2  -5  -1 -3.6087  4.1331   1
   2  -5  -1 -2.4929  2.5729   4
  -2   5   1  9.4592 10.2506   1
  -2   5   1 0.12184 3.54691   1
  -2   5   1 -4.1506  6.6366   5
   1  -5  -1 1006.36   89.37   4
   1  -5  -1 1020.96   73.54   1
   1  -5  -1 1164.00   84.01   5
  -1   5   1 1114.19   73.61   1
  -1   5   1 1030.13   84.01   4
   0  -5  -1 2318.78  168.74   5
   0  -5  -1 2058.00  157.50   1
   0  -5  -1 2391.85  180.04   4
   0  -5  -1 2262.00  157.69   1
   0   5   1 2199.53  157.59   1
   0   5   1 2590.56  168.57   5
   0   5   1 2271.69  157.58   1
  -1  -5  -1 22.6244 10.2060   4
  -1  -5  -1 17.0592  2.1591   2
  -1  -5  -1 29.4029  7.9434   5
   1   5   1 21.5525  4.8741   1
   1   5   1 14.9798  2.5025   1
   1   5   1 14.4764  7.5506   4
   1   5   1 17.3791  5.3932   2
  -2  -5  -1 2848.31  213.34   5
  -2  -5  -1 2958.20  197.97   1
  -2  -5  -1 3022.14  226.39   4
   2   5   1 3001.46  226.40   4
   2   5   1 2799.07  197.80   1
   2   5   1 2717.34  197.83   1
  -3  -5  -1 177.248  16.769   4
  -3  -5  -1 198.476  14.434   1
  -3  -5  -1 208.925  84.000   5
   3   5   1 204.432  15.321   4
   3   5   1 158.256  14.007   2
   3   5   1 178.114  14.111   1
   3   5   1 174.259  15.400   1
  -4  -5  -1 754.106  51.207   5
  -4  -5  -1 671.381  47.497   1
  -4  -5  -1 593.321  56.028   4
  -4  -5  -1 641.170  49.660   2
   4   5   1 599.385  47.354   1
   4   5   1 761.419  54.116   3
   4   5   1 707.784  47.406   1
   4   5   1 723.026  56.532   4
  -5  -5  -1 1091.90   92.37   5
  -5  -5  -1 1080.73   94.11   4
   5   5   1 1088.54   81.07   3
   5   5   1 976.973  78.382   1
  -6  -5  -1 16.3895  5.7674   4
  -6  -5  -1 7.91804 4.45510   5
  -6  -5  -1 6.33906 5.45438   1
   6   5   1 7.15072 3.74480   3
  -7  -5  -1 60.4080  5.8339   1
  -7  -5  -1 66.0470  7.1157   5
   7   5   1 66.0405 10.2829   3
   7   5   1 66.8539  5.6715   1
   7   5   1 65.6166  5.9697   1
  -8  -5  -1 330.697  27.520   5
  -8  -5  -1 314.163  22.727   1
   8   5   1 288.075  22.475   1
   8   5   1 342.542  25.820   3
   8   5   1 347.277  22.876   1
   8   5   1 273.435  24.196   2
  -9  -5  -1 238.445  28.030   5
  -9  -5  -1 230.255  17.519   1
   9   5   1 231.363  17.572   1
   9   5   1 243.071  19.281   2
   9   5   1 259.111  21.094   3
   9   5   1 233.688  17.348   1
 -10  -5  -1 1963.94  297.68   1
 -10  -5  -1 2352.89  220.33   5
  10   5   1 2164.17  232.80   1
  10   5   1 2381.39  172.41   1
  10   5   1 2380.84  181.16   3
  10   5   1 2652.40  172.73   2
 -11  -5  -1 3.26036 2.94600   1
 -11  -5  -1 10.4473  9.2180   5
  11   5   1 0.71967 9.39673   2
  11   5   1 4.96555 5.68503   1
  12   5   1 -0.7682  5.7369   3
  12   5   1 5.19119 3.90200   1
  12   5   1 13.4266  5.8268   2
 -13  -5  -1 9.15140 5.27513   5
  13   5   1 6.53818 2.14069   1
  13   5   1 3.34573 6.98245   3
  13   5   1 2.13638 5.26534   2
  14   5   1 70.7739  5.7375   1
 -15  -5  -1 98.7349 11.0246   5
  15   5   1 107.989  11.751   3
 -16  -5  -1 34.5317  7.2160   5
  16   5   1 28.8004  7.1831   3
  17   5   1 1.23232 4.86551   3
  18   5   1 32.4920  7.7066   3
  19   5   1 -12.660   6.642   3
  20   5   1 4.12862 6.89235   3
 -23   6   1 4.34547 8.04353   4
 -22   6   1 89.2303 13.5921   4
 -21   6   1 -0.4524  7.8651   4
 -20   6   1 1.64781 7.50995   4
 -19   6   1 80.9742 12.6091   4
 -17   6   1 -6.9114  9.1034   4
 -16   6   1 220.752  24.051   4
 -15   6   1 119.517  13.625   4
  14  -6  -1 26.6269  3.1918   1
 -14   6   1 31.6970  6.8690   4
  13  -6  -1 197.072  14.353   1
 -13   6   1 181.310  14.126   1
 -13   6   1 216.169  18.513   4
  12  -6  -1 717.927  51.175   1
  12  -6  -1 699.969  53.641   1
 -12   6   1 713.125  51.029   1
 -12   6   1 821.271  60.916   4
  11  -6  -1 -0.0515  8.9075   1
 -11   6   1 -0.3019 20.7376   4
  10  -6  -1 1157.07   80.95   1
  10  -6  -1 1092.69   83.10   1
 -10   6   1 1258.15   94.06   4
 -10   6   1 1184.23   80.84   1
   9  -6  -1 20.1678  6.1788   1
   9  -6  -1 6.90778 3.63366   1
  -9   6   1 10.5219  2.1152   1
  -9   6   1 10.5075 12.8196   4
   8  -6  -1 120.103  10.665   1
   8  -6  -1 115.025   9.102   1
  -8   6   1 114.442   9.085   1
  -8   6   1 130.656  27.710   4
   7  -6  -1 7.93289 6.15611   1
   7  -6  -1 2.13132 3.30979   1
  -7   6   1 1.47341 5.48320   2
  -7   6   1  3.3106 15.3650   4
  -7   6   1 13.0185  2.7864   1
   6  -6  -1 88.1610  7.3469   1
   6  -6  -1 97.9886  7.7575   1
  -6   6   1 91.6771  7.3989   1
  -6   6   1 73.4124 16.3766   4
  -6   6   1 89.4343  7.3799   2
   5  -6  -1 25.0650  5.2191   1
  -5   6   1 17.8416  3.2997   2
  -5   6   1 18.0544 11.0076   4
  -5   6   1 24.6898  3.1616   1
   4  -6  -1 12.2481  4.0009   1
  -4   6   1 20.0561 15.0048   4
  -4   6   1 13.9111  2.8049   1
  -4   6   1 17.4462  4.0281   5
   3  -6  -1 133.638  12.677   5
  -3   6   1 167.477  12.298   5
  -3   6   1 127.516  16.670   4
   2  -6  -1 90.0481  9.1657   4
   2  -6  -1 80.3746 20.8891   5
  -2   6   1 89.2022 27.2286   4
  -2   6   1 80.3282  7.2895   1
   1  -6  -1 1588.32  376.52   4
   1  -6  -1 1543.06  162.61   1
  -1   6   1 1374.51  143.16   1
   0  -6  -1 4806.44  527.64   4
   0   6   1 5674.14  370.22   1
  -1  -6  -1 195.309  17.947   4
  -1  -6  -1 199.962  21.317   1
  -1  -6  -1 186.583  17.834   5
   1   6   1 194.777  16.468   1
   1   6   1 203.139  14.628   1
  -2  -6  -1 340.731  39.379   2
   2   6   1 367.406  25.681   1
  -3  -6  -1  3.3696 19.1171   4
  -3  -6  -1 17.9571  9.2397   2
  -3  -6  -1 20.8472  7.9867   1
  -3  -6  -1 5.51603 6.06500   5
   3   6   1 16.1248  5.3953   2
  -4  -6  -1 28.4263  9.9682   2
  -4  -6  -1 36.8153  4.4928   1
  -4  -6  -1 36.1848  9.5283   5
   4   6   1 69.0577 17.2529   4
   4   6   1 46.3884  4.2252   1
   4   6   1 38.8644  4.2176   2
   4   6   1 33.2246 10.2701   1
  -5  -6  -1 168.588  17.489   5
  -5  -6  -1 157.514  13.999   1
   5   6   1 157.828  13.529   2
   5   6   1 176.075  14.569   3
  -6  -6  -1 3450.16  365.81   5
   6   6   1 3371.60  253.19   2
   6   6   1 3627.09  241.20   1
   6   6   1 3654.56  266.58   3
   6   6   1 3465.28  241.20   1
  -7  -6  -1 17.6291 12.5762   1
  -7  -6  -1  4.1326 42.2517   5
   7   6   1 -3.3937 10.4320   1
   7   6   1 1.24676 9.22977   2
  -8  -6  -1 -0.7977  2.4649   1
  -8  -6  -1 -6.5398  4.8023   5
   8   6   1 -2.2398  3.8723   1
   8   6   1 0.40918 8.10527   2
   8   6   1 -3.3172  9.7793   3
   8   6   1 0.69057 2.03782   1
  -9  -6  -1 18.9201  7.1923   5
  -9  -6  -1 23.4721  3.6905   1
   9   6   1 22.9698  3.6994   1
   9   6   1 27.6390  6.4045   1
   9   6   1 34.0400  9.4322   2
   9   6   1 21.8351  9.0269   3
 -10  -6  -1 33.9063  4.1455   1
 -10  -6  -1 24.5875  5.9435   5
  10   6   1 41.0994  7.5709   2
  10   6   1 41.5021 17.3617   3
  10   6   1 30.6760 26.0400   1
 -11  -6  -1 52.8686  5.2000   1
 -11  -6  -1 45.3350  7.6533   5
  11   6   1 42.2790  5.3482   1
  11   6   1 46.9285  9.2315   3
 -12  -6  -1 -3.0480  9.5280   5
  12   6   1 6.80613 6.47100   3
  12   6   1 -9.2364  5.2199   2
 -13  -6  -1 63.1753 16.0764   5
  13   6   1 69.4916  7.9948   1
  13   6   1 82.5922  9.2697   2
  13   6   1 71.3734  8.3991   3
 -14  -6  -1 28.6315  6.0747   5
  14   6   1 28.6168  3.3009   1
 -15  -6  -1 43.1958 14.3970   5
  15   6   1 49.5806  7.8597   3
  16   6   1 9.13697 5.94950   3
 -17  -6  -1 26.1777 10.5871   5
  17   6   1 15.4307  5.1175   3
 -18  -6  -1 74.5135 10.1864   5
  18   6   1 62.2673  9.8671   3
  19   6   1 25.3837  7.9362   3
  20   6   1 19.7922  6.1167   3
 -22   7   1 68.5032 11.9840   4
 -20   7   1 19.4367  8.3142   4
 -18   7   1 1005.08   82.63   4
 -17   7   1 21.5231  6.3310   4
 -16   7   1 142.855  16.310   4
 -15   7   1 -7.0067 14.4057   4
  14  -7  -1 5.48014 2.06384   1
 -14   7   1  4.0585 13.3725   4
  13  -7  -1 587.601  43.151   1
 -13   7   1 675.330  51.404   4
 -13   7   1 593.135  42.999   1
  12  -7  -1 21.4592  3.2729   1
  12  -7  -1 22.6238  3.6774   1
 -12   7   1 17.6986  2.7455   1
 -12   7   1 23.9898 19.4923   4
  11  -7  -1 368.035  25.263   1
  11  -7  -1 319.667  25.052   1
 -11   7   1 354.135  29.839   4
 -11   7   1 359.970  25.022   1
  10  -7  -1 32.9412  3.8774   1
  10  -7  -1 28.4987  3.5745   1
 -10   7   1 26.7889 11.2241   4
 -10   7   1 26.3118  3.5308   1
   9  -7  -1 3.24013 2.51737   1
   9  -7  -1 1.62956 5.74905   1
  -9   7   1 3.00487 2.19425   1
  -9   7   1 4.47683 6.34669   4
   8  -7  -1 25.3388  6.2063   1
   8  -7  -1 39.7435  6.9735   1
  -8   7   1 19.7236 10.7351   4
  -8   7   1 28.2081  3.5300   1
   7  -7  -1 125.296  10.471   1
   7  -7  -1 144.986  20.214   1
  -7   7   1 139.604  26.583   4
  -7   7   1 137.021  13.477   1
  -7   7   1 114.348   9.959   2
   6  -7  -1 2829.73  178.83   1
  -6   7   1 2306.57  223.16   2
   5  -7  -1 131.202  10.910   1
  -5   7   1 137.193  10.713   2
  -5   7   1 193.351  28.522   4
   4  -7  -1 279.115  20.749   1
   4  -7  -1 275.881  20.559   1
  -4   7   1 287.509  20.670   1
   3  -7  -1 23.4540  9.3773   5
   3  -7  -1 37.7109  9.3123   1
  -3   7   1 12.5588 13.5667   4
  -3   7   1 22.5899 10.9071   1
   2  -7  -1 27.2393  4.1600   1
   2  -7  -1 35.5746  9.4546   5
  -2   7   1 17.9793  6.3090   4
  -2   7   1 24.7092  8.3960   1
   1  -7  -1 66.0459 36.8975   1
   1  -7  -1 88.2823 24.9350   5
  -1   7   1 107.403   8.559   1
  -1   7   1 92.4803  9.9216   4
   0  -7  -1 1670.57  132.88   4
   0  -7  -1 1682.11  125.41   5
   0  -7  -1 1577.57  113.47   1
   0   7   1 1657.68  113.41   1
  -1  -7  -1 51.1588 14.5096   4
  -1  -7  -1 34.9656 15.5025   1
  -1  -7  -1 35.9759  9.5175   5
   1   7   1 37.3835 13.2374   1
   1   7   1 35.1982  9.6452   4
  -2  -7  -1 2178.33  235.86   4
  -2  -7  -1 2408.96  184.28   5
  -2  -7  -1 2327.14  165.57   1
   2   7   1 2643.43  203.86   4
  -3  -7  -1 471.216  72.951   5
  -3  -7  -1 367.851  36.490   2
  -3  -7  -1 421.159  35.399   4
   3   7   1 358.524  44.421   4
  -4  -7  -1 1477.30  119.94   5
  -4  -7  -1 1594.82  126.40   4
   4   7   1 1532.63  102.29   1
   4   7   1 1422.23  106.97   2
   4   7   1 1385.83  104.48   1
  -5  -7  -1 174.519  56.521   5
   5   7   1 177.486  19.199   1
   5   7   1 169.045  14.808   1
   5   7   1 197.391  19.550   3
   5   7   1 186.221  16.304   2
  -6  -7  -1 -0.3372 13.7896   5
   6   7   1 3.73717 7.13733   2
   6   7   1 -4.2564  2.1204   1
   6   7   1 -1.7423 11.2078   1
   6   7   1 -2.2266  8.9102   3
  -7  -7  -1 -8.2041  6.4094   5
  -7  -7  -1 7.94713 7.98025   1
   7   7   1  1.4203 10.5130   1
   7   7   1 7.09818 6.89465   2
   7   7   1 0.55606 8.84651   3
   7   7   1 0.51607 1.58350   1
  -8  -7  -1 50.3242  9.6929   5
  -8  -7  -1 46.0208  6.0437   1
   8   7   1 47.1341  6.2717   1
   8   7   1 59.5137  6.6484   2
   8   7   1 44.7916  4.6989   1
  -9  -7  -1 1.66894 2.88531   1
  -9  -7  -1  2.3394 15.0651   5
   9   7   1 -0.9386  9.2694   1
   9   7   1 4.89422 2.10878   1
   9   7   1 2.19627 6.47076   2
   9   7   1 6.39711 4.51391   3
 -10  -7  -1 44.9744  5.1813   1
 -10  -7  -1 34.4534 17.7677   5
  10   7   1 50.5937 10.2144   2
  10   7   1 40.6288  7.3052   1
  10   7   1 51.4543  7.2890   3
 -11  -7  -1 156.802  14.835   1
 -11  -7  -1 133.663  27.846   5
  11   7   1 170.356  15.305   2
  11   7   1 148.264  12.951   1
  11   7   1 143.784  21.968   3
 -12  -7  -1 93.4116 12.0164   5
  12   7   1 100.576   8.836   1
  12   7   1 97.1012 10.9617   3
  12   7   1 120.322  10.967   2
 -13  -7  -1 56.5143  9.7537   5
  13   7   1 72.6028  6.9674   1
  13   7   1 66.2559  8.2291   3
 -14  -7  -1 53.1350 11.4806   5
  14   7   1 55.2798  5.3744   1
  14   7   1 49.9416  8.1397   3
 -15  -7  -1 62.1324 10.8921   5
  15   7   1 65.9849  9.1255   3
 -16  -7  -1 33.6051  8.7192   5
  16   7   1 34.2268  7.6277   3
 -17  -7  -1 11.2887  5.5761   5
  17   7   1 4.33566 6.28756   3
 -18  -7  -1 238.162  21.381   5
  18   7   1 217.564  21.372   3
  19   7   1 -0.2897  4.3194   3
 -23   8   1 -6.0093  8.4768   4
 -22   8   1 0.08841 5.56383   4
 -20   8   1 74.4555 11.0589   4
 -19   8   1 -3.6883  7.5365   4
 -18   8   1 48.5608 13.8587   4
 -17   8   1 -9.4083  8.7125   4
  16  -8  -1 734.362  76.271   1
 -16   8   1 1008.92   73.61   4
  15  -8  -1 298.821  23.666   1
 -15   8   1 370.010  30.084   4
  14  -8  -1 173.390  13.875   1
 -14   8   1 196.425  18.445   4
  13  -8  -1 100.327   8.249   1
 -13   8   1 95.4028  7.7739   1
 -13   8   1 84.2219 11.5246   4
  12  -8  -1 5.30085 3.07318   1
 -12   8   1 -5.6175 14.2854   4
 -12   8   1 0.10625 2.54801   1
  11  -8  -1 99.5902 11.4205   1
 -11   8   1 99.6686  8.5723   1
 -11   8   1 84.8738 26.4322   4
  10  -8  -1 35.4469  4.8712   1
 -10   8   1 38.7871  7.1822   4
 -10   8   1 29.9611  4.0215   1
   9  -8  -1 134.290  11.105   1
   9  -8  -1 135.971  10.643   1
  -9   8   1 117.780  12.714   4
  -9   8   1 138.372  10.624   1
   8  -8  -1 467.911  30.453   1
   8  -8  -1 374.651  29.943   1
   7  -8  -1 368.082  26.995   1
  -7   8   1 364.202  26.513   1
   6  -8  -1 2671.93  163.90   1
  -6   8   1 2244.20  174.79   2
  -6   8   1 2002.96  196.44   4
  -6   8   1 2572.12  163.60   1
   5  -8  -1 359.372  57.492   1
  -5   8   1 203.475  30.675   2
  -5   8   1 328.445  38.369   1
   4  -8  -1 325.781  23.705   1
   4  -8  -1 352.246  25.699   5
  -4   8   1 306.491  23.869   1
  -4   8   1 295.404  31.717   4
   3  -8  -1 540.815  39.303   5
  -3   8   1 482.285  36.357   1
   2  -8  -1 90.1264  8.3811   5
   2  -8  -1 86.1886  7.9772   1
  -2   8   1 85.4124 11.0164   4
  -2   8   1 77.0274  7.4788   1
   1  -8  -1 166.815  25.960   1
   1  -8  -1 119.287  27.358   5
  -1   8   1 128.726  14.927   1
  -1   8   1 152.584  25.006   4
   0  -8  -1 -2.2609  9.7407   1
   0  -8  -1 -1.5079  9.9782   5
   0   8   1 -0.4692  3.3437   2
   0   8   1 -2.5601 11.6894   1
  -1  -8  -1 48.5072 23.7175   1
   1   8   1 34.8608 17.5336   1
  -2  -8  -1 427.336  33.361   5
  -2  -8  -1 415.064  30.782   1
   2   8   1 422.988  39.688   4
  -3  -8  -1 40.5709 19.1033   1
  -3  -8  -1 17.2998  3.8560   2
   3   8   1 33.1208 21.0188   1
   3   8   1 17.0342 14.9105   4
   3   8   1 23.0366  3.6273   2
  -4  -8  -1 1013.05   73.59   5
  -4  -8  -1 937.407  68.375   1
   4   8   1 984.870  71.165   2
  -5  -8  -1 376.916  27.944   1
  -5  -8  -1 352.987  34.293   5
   5   8   1 317.332  27.551   2
   5   8   1 402.079  30.176   4
   5   8   1 400.222  29.856   3
   5   8   1 353.561  26.893   1
  -6  -8  -1  6.4755 15.2126   5
   6   8   1 13.6886  6.9744   1
   6   8   1 11.2584  6.0011   2
   6   8   1 14.9941  5.4342   3
  -7  -8  -1 112.218  29.162   5
  -7  -8  -1 128.426  13.929   1
   7   8   1 102.216  12.198   2
   7   8   1 108.422  13.697   1
   7   8   1 129.014  11.279   3
  -8  -8  -1 221.990  17.029   1
  -8  -8  -1 220.876  30.737   5
   8   8   1 185.562  17.603   2
   8   8   1 234.554  16.707   1
   8   8   1 239.200  19.429   3
  -9  -8  -1 -4.9653 10.4453   5
  -9  -8  -1 -6.7117 10.3230   1
   9   8   1 -0.6915  3.9672   3
   9   8   1 -3.7484  9.6382   2
 -10  -8  -1 1468.38  162.95   1
  10   8   1 1290.46  154.49   1
  10   8   1 1563.58  118.60   3
  10   8   1 1685.07  112.90   2
 -11  -8  -1 -2.5704  9.9526   5
  11   8   1 19.7744  8.3330   1
  11   8   1 19.2785  6.3968   2
  11   8   1 -0.1460  5.8403   3
 -12  -8  -1 77.4454  9.3277   5
  12   8   1 83.4703  8.9481   1
  12   8   1 62.5463  9.0896   3
 -13  -8  -1 0.22996 7.86448   5
 -14  -8  -1 0.67064 6.28560   5
  14   8   1 4.04771 5.50292   3
  14   8   1 4.41112 2.74708   1
  15   8   1 9.69477 6.03407   3
 -16  -8  -1 40.7307  9.8332   5
  16   8   1 35.3274  6.5605   3
 -17  -8  -1 -0.5275  5.9422   5
 -18  -8  -1 25.9511  7.5879   5
  18   8   1 29.5758  6.6321   3
  19   8   1 -6.8229  6.5692   3
 -22   9   1 69.8698 12.1922   4
 -21   9   1 0.06553 7.95534   4
 -20   9   1 191.925  19.952   4
 -19   9   1 27.0093 10.1409   4
 -18   9   1 689.413  58.213   4
  17  -9  -1 0.62275 3.53225   1
  16  -9  -1 483.139  40.574   1
 -16   9   1 662.205  48.590   4
  15  -9  -1 9.49381 3.10898   1
 -15   9   1 15.5344  8.1953   4
  14  -9  -1 214.676  16.754   1
 -14   9   1 229.766  20.809   4
  13  -9  -1 134.610  12.361   1
 -13   9   1 157.993  19.400   4
 -13   9   1 146.094  11.464   1
  12  -9  -1 152.310  12.151   1
 -12   9   1 145.441  15.276   4
 -12   9   1 143.050  11.611   1
  11  -9  -1 -10.531   5.212   1
  11  -9  -1 8.38615 8.37570   1
 -11   9   1 5.21309 6.87779   1
 -11   9   1 -7.0543 13.3202   4
  10  -9  -1 777.915  54.391   1
 -10   9   1 753.760  62.567   4
 -10   9   1 781.005  54.125   1
  -9   9   1 66.3201 40.1735   4
  -9   9   1 59.6768  5.8598   1
   8  -9  -1 -14.206   7.320   1
  -8   9   1 0.67073 3.11700   1
   7  -9  -1 351.242  25.848   1
  -7   9   1 312.610  25.825   2
  -7   9   1 386.137  25.736   1
   6  -9  -1 810.439  49.781   1
  -6   9   1 606.813  64.228   2
  -6   9   1 690.893  49.090   1
  -6   9   1 558.108 107.975   4
  -5   9   1  6.9853 51.4088   4
  -5   9   1 7.39567 6.36048   2
  -5   9   1 -0.8241 27.5745   1
   4  -9  -1 361.060  29.648   1
   4  -9  -1 389.524  40.281   5
  -4   9   1 402.424  99.040   4
  -4   9   1 361.293  27.510   1
   3  -9  -1 55.0516 11.6644   5
  -3   9   1 41.7448  6.6540   1
  -3   9   1 62.9913 16.7757   4
   2  -9  -1 9.28896 4.43370   5
   2  -9  -1 8.69853 9.92100   1
  -2   9   1  9.7501 10.8795   4
  -2   9   1 10.0375 10.4903   1
   1  -9  -1 1039.36   69.33   1
  -1   9   1 939.617  68.916   1
   0  -9  -1 306.247 108.765   5
   0   9   1 195.763  15.281   1
  -1  -9  -1 451.517  36.052   1
  -1  -9  -1 393.284  32.627   5
   1   9   1 396.162  38.176   4
  -2  -9  -1 686.204  52.014   5
   2   9   1 646.947  47.982   1
   2   9   1 710.443  62.176   4
  -3  -9  -1 31.5065 25.4719   1
  -3  -9  -1 4.01317 9.70650   5
   3   9   1 17.4028  3.0545   2
   3   9   1 33.6795 32.1330   1
  -4  -9  -1 741.582  56.026   5
  -4  -9  -1 722.132  51.961   1
  -5  -9  -1 464.520  35.951   1
  -5  -9  -1 368.559  34.921   5
   5   9   1 483.112  36.489   4
   5   9   1 455.197  32.355   1
  -6  -9  -1 115.104  25.817   5
  -6  -9  -1 137.389  11.441   1
   6   9   1 141.637  13.478   3
   6   9   1 114.735  11.121   2
   6   9   1 145.864  11.637   1
  -7  -9  -1 298.738  27.336   5
  -7  -9  -1 282.374  23.843   1
   7   9   1 319.460  24.877   2
   7   9   1 356.032  24.210   1
   7   9   1 350.768  27.022   3
  -8  -9  -1 40.8180 23.9644   5
  -8  -9  -1 57.8248  6.5466   1
   8   9   1 67.1478  6.8785   1
   8   9   1 49.6477  6.5412   2
   8   9   1 62.8549 12.1215   3
  -9  -9  -1  9.1161 28.4670   1
  -9  -9  -1  0.2688 93.3115   5
   9   9   1 24.4328  6.4011   2
   9   9   1 16.8150 27.9242   1
 -10  -9  -1 34.8413  5.2641   1
 -10  -9  -1 37.6226 17.7877   5
  10   9   1 37.7395  5.6803   2
  10   9   1 38.1788  6.4394   1
  10   9   1 41.5166  7.5625   3
 -11  -9  -1 26.9732 13.8517   5
  11   9   1 30.2137  6.9439   3
  11   9   1 29.3843  5.2824   2
  11   9   1 37.6848  6.9934   1
 -12  -9  -1 46.8079 17.8550   5
  12   9   1 48.2854  8.8000   3
  12   9   1 52.1335  6.2936   1
  12   9   1 63.3274  7.7128   2
 -13  -9  -1 15.0328  7.4201   5
  13   9   1 8.58888 5.23243   2
  13   9   1 -3.2629  6.3314   3
  14   9   1 28.3554  4.4116   1
  14   9   1 29.9368  6.0216   3
 -15  -9  -1 10.4333 14.8818   5
  15   9   1 -7.7502  6.3562   3
  16   9   1 12.6396  6.5496   3
 -17  -9  -1 20.6712  7.6905   5
  17   9   1 0.31060 5.47292   3
  18   9   1 35.5489  7.8669   3
 -21  10   1 4.72455 7.93249   4
 -20  10   1 10.2082  7.7034   4
 -18  10   1 201.276  20.950   4
  17 -10  -1 10.7422  3.1189   1
 -17  10   1 6.41908 8.44310   4
 -16  10   1 439.449  38.257   4
  15 -10  -1 81.1432  7.5462   1
 -15  10   1 67.7089 10.7618   4
  14 -10  -1 -3.9734  3.0339   1
 -14  10   1 1.45500 6.53648   4
 -13  10   1 -17.122  14.520   4
  12 -10  -1 1344.73   91.32   1
 -12  10   1 1341.49   90.98   1
 -12  10   1 1245.63  104.78   4
  11 -10  -1 27.8172  8.2579   1
 -11  10   1 22.4616  4.1509   1
 -11  10   1  1.2858 14.1447   4
  10 -10  -1 -0.9279  6.8841   1
 -10  10   1 -0.5636  2.5343   1
 -10  10   1 -4.6596  9.3670   4
  -9  10   1 19.5182 29.8724   4
  -9  10   1 20.2721  8.8484   1
   8 -10  -1 249.742  19.786   1
  -8  10   1 259.125  22.820   4
  -7  10   1 444.943  32.308   1
   6 -10  -1 487.742  36.437   1
  -6  10   1 494.443  41.434   4
  -6  10   1 508.235  36.055   1
   5 -10  -1 1199.14   79.36   1
  -5  10   1 1214.66   79.52   1
  -5  10   1 977.284  90.293   4
   4 -10  -1 -1.9394 10.2525   1
   4 -10  -1 2.14958 4.08942   5
  -4  10   1 -0.8468  2.4821   1
  -4  10   1 3.61831 8.94655   4
   3 -10  -1 39.4109 19.6109   5
   3 -10  -1 56.7816 16.0939   1
  -3  10   1 41.4033 12.4291   1
  -3  10   1 50.2300 28.6201   4
   2 -10  -1 -7.3716  4.8789   5
   2 -10  -1  2.8164 18.4360   1
  -2  10   1 -2.7179  9.4286   4
  -2  10   1 -1.3149  2.9431   1
   1 -10  -1 1566.43  109.24   1
  -1  10   1 1563.82  124.74   4
  -1  10   1 1587.54  108.95   1
   0 -10  -1 147.573  12.084   1
   0 -10  -1 125.065  39.951   5
   0  10   1 122.390  19.365   4
   0  10   1 127.700  14.138   1
  -1 -10  -1 64.7719 10.1658   1
  -1 -10  -1 53.5417  9.3702   5
   1  10   1 69.4374 18.8655   4
   1  10   1 73.3407  8.1851   1
  -2 -10  -1 -4.6468  5.1191   1
  -2 -10  -1 -1.3416 30.7708   5
   2  10   1 -11.647  12.736   1
   2  10   1 2.15417 1.70119   2
   2  10   1 -14.545  11.667   4
  -3 -10  -1 40.2688 21.7222   1
  -3 -10  -1 34.3134 26.1087   5
   3  10   1 48.5712 25.4193   1
   3  10   1 26.1846  4.1804   2
  -4 -10  -1 -5.3712  5.2511   1
  -4 -10  -1 -5.1280 16.7953   5
   4  10   1 -0.1685 12.6771   1
   4  10   1 -4.4684  2.8091   2
  -5 -10  -1 14.8781 18.3786   1
  -5 -10  -1  1.7109 11.7962   5
   5  10   1 -4.0414 22.5354   1
   5  10   1 -6.6763 18.8167   4
   5  10   1 0.45708 9.70448   2
  -6 -10  -1 79.0773 39.5308   5
  -6 -10  -1 48.0116 27.4277   1
   6  10   1 99.3670 10.4643   3
   6  10   1 92.8439 16.4715   1
   6  10   1 84.7158  9.7978   2
  -7 -10  -1 144.626  12.887   1
  -7 -10  -1 136.160  19.738   5
   7  10   1 171.641  22.881   3
   7  10   1 150.855  12.754   2
  -8 -10  -1 1556.55  139.24   1
   8  10   1 1804.22  124.25   2
   8  10   1 1720.04  131.35   3
  -9 -10  -1 17.7768  4.3584   1
  -9 -10  -1 9.05112 7.43779   5
   9  10   1 10.1485  5.0193   2
   9  10   1 17.4889  6.6696   1
 -10 -10  -1 47.4520 17.7671   5
  10  10   1 77.8754  7.8016   1
  10  10   1 64.3145  9.5597   3
  10  10   1 78.3926  8.3235   2
  11  10   1 208.408  20.398   3
  11  10   1 213.764  17.609   1
  11  10   1 253.741  19.325   2
  12  10   1 463.806  38.170   3
  12  10   1 452.117  33.478   1
  13  10   1 147.207  12.691   1
  13  10   1 154.986  15.579   3
 -14 -10  -1 125.066  13.491   5
  14  10   1 117.682  10.444   1
  14  10   1 116.988  13.444   3
 -15 -10  -1 40.1328 17.0800   5
  15  10   1 31.9617  7.3754   3
 -16 -10  -1 52.2642 10.1053   5
  16  10   1 40.5525  8.5874   3
  17  10   1 -5.0304  6.4737   3
 -18 -10  -1 14.5834  7.4089   5
  18  10   1 10.4857  6.0064   3
 -22  11   1 -8.6932  9.2892   4
 -21  11   1 14.5858  8.2143   4
  18 -11  -1 18.5725  3.3929   1
  17 -11  -1 195.978  15.254   1
  16 -11  -1 100.824   9.789   1
 -16  11   1 130.832  14.325   4
  15 -11  -1 2.83002 3.64407   1
 -15  11   1 -8.2174  8.0767   4
 -14  11   1 -11.868   7.544   4
  13 -11  -1 33.7220  5.8797   1
 -13  11   1 32.6585  4.8700   1
 -13  11   1 25.3445 13.9573   4
  12 -11  -1 68.2950  7.7559   1
 -12  11   1 50.0386 15.6874   4
 -12  11   1 67.7267  6.7478   1
  11 -11  -1 184.714  16.269   1
 -11  11   1 142.295  12.798   1
 -11  11   1 163.519  26.452   4
  10 -11  -1 346.645  27.937   1
   9 -11  -1 89.9537 15.4876   1
  -9  11   1 80.5112 14.2848   1
  -9  11   1 56.5199 17.8178   4
   8 -11  -1 90.1203 14.8574   1
  -8  11   1 93.6179 20.7086   4
  -8  11   1 93.4895  8.9988   1
   7 -11  -1 14.8317 11.8641   1
  -7  11   1 12.7928  2.1007   2
  -7  11   1 36.4944 45.6111   4
  -7  11   1 34.0721 10.8649   1
   6 -11  -1 235.578  19.828   1
  -6  11   1 279.254  22.740   1
   5 -11  -1 281.439  27.034   1
  -5  11   1 397.443  50.736   4
  -5  11   1 343.194  24.774   1
   4 -11  -1 105.626  11.279   1
   4 -11  -1 105.308  52.214   5
  -4  11   1 95.1665 13.7888   1
   3 -11  -1 1626.51  108.45   1
   3 -11  -1 1544.24  118.51   5
  -3  11   1 1491.77  123.30   4
   2 -11  -1 269.322  45.470   1
   2 -11  -1 243.456  43.060   5
  -2  11   1 248.229  18.721   1
  -2  11   1 214.992  21.371   4
   1 -11  -1 550.574  41.141   5
  -1  11   1 497.836  37.698   1
   0 -11  -1 37.9372  9.9011   1
   0 -11  -1 17.0427  7.5818   5
   0  11   1 23.3991  4.4343   1
  -1 -11  -1 82.2736 30.9571   5
  -1 -11  -1 102.615  16.011   1
   1  11   1 99.5002 12.5029   1
  -2 -11  -1 214.788  20.882   1
  -2 -11  -1 161.094  25.110   5
   2  11   1 176.274  19.947   4
   2  11   1 183.404  15.973   1
  -3 -11  -1 26.8852  8.8351   1
  -3 -11  -1 23.6802 30.0861   5
   3  11   1 33.3296 20.1909   4
   3  11   1 25.9462 11.2808   1
   3  11   1 23.4221  4.1368   2
  -4 -11  -1 342.523  25.458   1
   4  11   1 299.430  27.438   4
   4  11   1 299.941  22.623   1
   4  11   1 248.036  22.215   2
  -5 -11  -1 84.4277 25.5491   5
  -5 -11  -1 118.064  14.253   1
   5  11   1 108.106  24.146   4
   5  11   1 105.874  11.540   1
   5  11   1 85.2858  8.6565   2
  -6 -11  -1 485.898  51.428   1
   6  11   1 583.845  40.202   1
   6  11   1 471.061  39.317   2
   6  11   1 576.134  52.329   3
  -7 -11  -1 166.717  17.744   1
  -7 -11  -1 154.765  22.546   5
   7  11   1 190.275  16.776   3
   7  11   1 182.723  14.835   2
  -8 -11  -1 113.788  14.468   5
  -8 -11  -1 146.001  12.468   1
   8  11   1 139.300  12.060   2
   8  11   1 129.515  14.460   1
   8  11   1 141.366  14.185   3
  -9 -11  -1 5.99111 9.82732   5
  -9 -11  -1 -3.7593  4.5261   1
   9  11   1 14.2835  9.7795   3
   9  11   1 5.17699 5.24436   2
   9  11   1 15.4857  8.1737   1
 -10 -11  -1 -7.4027  7.7046   5
  10  11   1 0.02801 3.58518   2
  10  11   1 -0.1821  4.1774   1
  10  11   1 6.54453 5.57495   3
 -11 -11  -1 49.1737 11.5207   5
  11  11   1 33.6010  5.9671   1
  11  11   1 34.1600  7.6515   3
  11  11   1 37.8671  6.3886   2
 -12 -11  -1 -3.8177  7.6863   5
  12  11   1 12.3388  4.3583   1
  12  11   1 6.82149 6.17340   3
 -13 -11  -1 153.787  16.091   5
  13  11   1 143.914  15.413   3
  13  11   1 152.364  12.882   1
  14  11   1 36.8000  6.3517   1
  14  11   1 39.8648  7.9084   3
 -15 -11  -1 91.5445 13.1221   5
  15  11   1 67.7156 11.0180   3
 -16 -11  -1 63.7655 10.4967   5
  16  11   1 49.7852  9.9318   3
 -17 -11  -1 -5.6114  8.2422   5
  17  11   1 6.44220 5.33780   3
 -21  12   1 13.3464  7.4338   4
 -20  12   1 272.477  26.752   4
  18 -12  -1 134.313  11.302   1
  16 -12  -1 98.4583 10.0672   1
 -16  12   1 128.136  14.122   4
  15 -12  -1 81.3175  8.7235   1
 -15  12   1 86.9949 11.7059   4
  14 -12  -1 -1.7489  3.9516   1
 -14  12   1 -1.0821  5.3476   4
  13 -12  -1 467.968  34.971   1
 -13  12   1 495.571  41.248   4
 -13  12   1 460.587  34.403   1
  12 -12  -1 668.559  48.936   1
 -12  12   1 692.916  48.573   1
  11 -12  -1 442.381  32.956   1
 -11  12   1 453.839  32.522   1
 -11  12   1 432.623  37.666   4
  10 -12  -1  4.2548 15.9363   1
 -10  12   1 -5.6505 14.3914   4
 -10  12   1 1.98119 3.94675   1
   9 -12  -1 824.118  62.890   1
  -9  12   1 903.997  63.150   1
  -9  12   1 930.324  72.135   4
   8 -12  -1 34.9633 11.4356   1
  -8  12   1 37.8713 15.0672   1
  -8  12   1 27.5960  6.4049   4
  -8  12   1 19.1632  2.6551   2
   7 -12  -1 88.7503 13.2904   1
  -7  12   1 100.515  10.365   1
  -6  12   1 41.6409 14.4700   4
  -6  12   1 14.9091  2.3575   2
  -6  12   1 22.9915 12.9899   1
   5 -12  -1 19.0336  5.8983   5
   5 -12  -1  6.4292 17.1513   1
  -5  12   1 11.1075  2.4267   2
  -5  12   1 27.1078  8.2489   1
   4 -12  -1  51.766 330.764   5
   4 -12  -1  17.179 130.120   1
  -4  12   1 29.0296 21.1955   1
  -4  12   1 43.0976 13.3301   4
   3 -12  -1 790.155  61.403   1
   3 -12  -1 733.386  59.802   5
  -3  12   1 798.262  63.153   4
  -3  12   1 773.339  55.021   1
   2 -12  -1 443.669 173.266   5
   2 -12  -1 334.586 123.334   1
  -2  12   1 287.987 113.464   1
  -2  12   1 474.595  65.110   4
   1 -12  -1  2.8765 24.5682   5
   1 -12  -1 -1.2701 20.9147   1
  -1  12   1 1.12596 1.11198   2
  -1  12   1 14.2240 11.5387   1
  -1  12   1  5.4779 17.6149   4
   0 -12  -1 1342.55   86.00   1
   0  12   1 1049.11   97.76   4
   0  12   1 1266.37   85.38   1
  -1 -12  -1 67.8770 11.1613   1
  -1 -12  -1 41.9422 47.7706   5
   1  12   1 83.0524 10.0757   1
  -2 -12  -1 759.685  53.624   1
   2  12   1 777.987  53.279   1
   2  12   1 690.094  62.940   4
  -3 -12  -1 933.359  63.572   1
   3  12   1 836.089  73.247   4
   3  12   1 894.163  63.058   1
  -4 -12  -1 626.118  41.417   1
   4  12   1 502.249  48.440   4
   4  12   1 548.145  40.717   1
  -5 -12  -1 -4.9598 12.7130   5
  -5 -12  -1 -3.5772  5.1946   1
   5  12   1 -4.6283 11.1480   4
  -6 -12  -1  8.4709 12.4206   5
  -6 -12  -1  1.4651 13.1432   1
   6  12   1 3.95280 8.30483   3
   6  12   1 -0.0959 12.9569   1
  -7 -12  -1 12.5145  4.8650   1
   7  12   1  5.5258 16.1691   3
   7  12   1 4.65654 4.23216   2
   7  12   1 6.30628 4.71104   1
  -8 -12  -1 122.623  11.227   1
  -8 -12  -1 104.824  34.081   5
   8  12   1 115.368  13.314   1
   8  12   1 110.207  10.332   2
   8  12   1 93.7442 12.5297   3
  -9 -12  -1 18.9706  7.6163   5
  -9 -12  -1 31.2915  5.8541   1
   9  12   1 25.8690  7.7480   3
   9  12   1 32.1808  5.3973   2
   9  12   1 36.9718  6.1390   1
  10  12   1 4.96723 4.46063   1
  10  12   1 -4.1543  5.6723   3
 -11 -12  -1  1.3004 11.6621   5
  11  12   1 0.37354 4.08595   1
  11  12   1 1.28197 4.22938   2
 -12 -12  -1 15.9965  7.9734   5
  12  12   1 -11.888  10.000   3
  12  12   1 4.51162 3.61626   1
  13  12   1 2.83827 7.22602   3
  13  12   1 22.0537  4.7507   1
 -14 -12  -1 27.1694  9.3062   5
  14  12   1 21.0485  4.6182   1
  15  12   1 34.9623  9.0787   3
 -21  13   1 4.66297 6.80481   4
 -20  13   1 345.367  32.246   4
  18 -13  -1 65.1474  7.0738   1
  17 -13  -1 -2.9973  4.7145   1
  16 -13  -1 57.2037  7.0914   1
  15 -13  -1 13.3572  4.9031   1
 -14  13   1 -1.0024  6.4000   4
  13 -13  -1 10.6860  8.6585   1
 -13  13   1 25.2236  4.9549   1
 -13  13   1 29.0854  6.4306   4
  12 -13  -1 61.5068  9.2410   1
 -12  13   1 58.5500  6.9229   1
 -12  13   1 57.7263 10.4841   4
  11 -13  -1 210.800  19.495   1
 -11  13   1 216.061  20.772   4
 -11  13   1 225.823  17.542   1
  10 -13  -1 69.5690  8.4528   1
 -10  13   1 94.5040  8.6341   1
 -10  13   1 75.5826 10.8909   4
   9 -13  -1 14.1196  8.2154   1
  -9  13   1 7.15381 9.63173   4
   8 -13  -1 81.8929 32.8507   1
  -8  13   1 74.0114 39.8293   4
  -8  13   1 86.4356  9.3665   1
   7 -13  -1 691.252  51.568   1
  -7  13   1 729.222  51.052   1
   6 -13  -1 50.9747 30.6991   1
  -6  13   1 66.6585 20.4868   1
  -6  13   1 66.6053 37.6652   4
   5 -13  -1 658.023  49.083   1
  -5  13   1 662.703  47.999   1
  -5  13   1 639.514  53.965   4
   4 -13  -1 269.387  26.783   5
   4 -13  -1 283.877  34.444   1
  -4  13   1 262.124  20.883   1
   3 -13  -1 -10.243  22.101   5
   3 -13  -1 -3.6873  6.4104   1
  -3  13   1 -1.9323 23.4285   4
  -3  13   1 4.45181 5.99894   1
   2 -13  -1 144.953  50.232   5
   2 -13  -1 156.541  35.624   1
  -2  13   1 142.122  18.337   1
  -2  13   1 162.240  20.653   4
   1 -13  -1 0.79266 7.09748   1
   1 -13  -1  0.1862 13.2094   5
  -1  13   1 0.36526 8.04383   1
   0 -13  -1 552.387  43.804   1
   0 -13  -1 636.434  47.793   5
   0  13   1 618.141  53.378   4
  -1 -13  -1 41.4308  9.3548   1
  -1 -13  -1 31.7050 16.5861   5
   1  13   1 27.8777  9.0003   1
   1  13   1 29.0449  5.6418   2
  -2 -13  -1 6.19085 6.89712   5
  -2 -13  -1  3.4219 11.1152   1
   2  13   1 8.94941 2.20735   2
   2  13   1 -1.8173 29.8685   4
   2  13   1 5.85517 6.33083   1
   3  13   1 212.732  17.335   2
   3  13   1 268.947  33.366   4
   3  13   1 223.459  18.459   1
  -4 -13  -1 -6.1812 18.6211   5
  -4 -13  -1 3.73428 5.73616   1
   4  13   1 -17.909  35.876   4
   4  13   1 0.20481 3.61843   1
   4  13   1 2.81290 2.32774   2
  -5 -13  -1  6.1810 21.7004   5
  -5 -13  -1 18.6702  5.8526   1
   5  13   1 26.2024  9.2393   4
   5  13   1 15.8444  3.1982   2
   5  13   1 26.2492  5.7651   1
   6  13   1 534.527  46.334   3
   6  13   1 596.875  41.724   1
  -7 -13  -1 52.5440  7.2737   1
  -7 -13  -1 39.7267 11.5951   5
   7  13   1 69.8723 11.0962   3
   7  13   1 63.4648  6.7073   2
  -8 -13  -1 -19.098  16.015   5
   8  13   1 8.71992 5.22878   3
   8  13   1 3.48829 6.28819   1
  -9 -13  -1 64.1571  9.8372   5
   9  13   1 66.0667  7.1907   2
   9  13   1 51.0319  7.6330   1
   9  13   1 48.9683  9.6171   3
 -10 -13  -1 107.281  14.521   5
  10  13   1 120.943  11.300   2
  10  13   1 119.587  11.545   1
  11  13   1 -10.092   7.462   3
  11  13   1 2.62283 4.54383   1
 -12 -13  -1 34.3796  8.8134   5
  12  13   1 29.8453  8.3673   3
 -13 -13  -1 9.60245 8.59106   5
  13  13   1 4.15116 8.74165   3
  13  13   1 0.99367 4.02035   1
 -21  14   1 15.0830  8.3629   4
 -20  14   1 4.06094 6.06504   4
 -19  14   1 6.17299 7.07135   4
  18 -14  -1 110.105  10.356   1
  17 -14  -1 -3.6812  4.1856   1
 -17  14   1 -8.2320  7.0669   4
  16 -14  -1 1.23491 4.75145   1
  15 -14  -1 25.7041  6.0676   1
  14 -14  -1 201.769  17.321   1
 -14  14   1 203.498  20.382   4
  13 -14  -1 54.7240  8.4018   1
 -13  14   1 71.2533  7.8617   1
  12 -14  -1 85.2723 10.1548   1
 -12  14   1 99.1653  9.5362   1
  11 -14  -1 1.88312 3.89739   1
 -11  14   1 5.35115 8.67900   4
 -11  14   1 6.35523 4.32706   1
  10 -14  -1 226.046  19.015   1
 -10  14   1 222.799  21.958   4
 -10  14   1 224.276  18.170   1
   9 -14  -1 120.419  12.508   1
  -9  14   1 127.381  11.749   1
  -9  14   1 137.082  19.331   4
   8 -14  -1 9.86308 9.11480   1
  -8  14   1 8.99654 9.94813   1
  -8  14   1 -0.1518 16.4595   4
   7 -14  -1 5.94446 6.17334   1
  -7  14   1  9.8405 10.0052   1
  -7  14   1 11.9322 20.5998   4
   6 -14  -1 23.4587  6.3685   1
  -6  14   1 42.6040  9.6490   1
   5 -14  -1 29.7007 16.1236   5
   5 -14  -1 42.5782  8.8063   1
  -5  14   1 55.3104  7.4038   1
  -5  14   1 69.7865 20.4751   4
   4 -14  -1 239.887  20.770   1
   4 -14  -1 247.866  88.195   5
  -4  14   1 248.343  65.384   4
  -4  14   1 251.227  19.818   1
   3 -14  -1 114.312  11.571   1
   3 -14  -1 104.666  22.914   5
  -3  14   1 84.0332  9.2637   1
   2 -14  -1 50.1813 23.7713   1
   2 -14  -1 38.3603 14.5421   5
  -2  14   1 50.0686 14.6919   1
   1 -14  -1 77.6247  9.4282   1
   1 -14  -1 76.9336 30.2660   5
  -1  14   1 58.2135  7.6844   1
   0 -14  -1 202.807  18.143   1
   0 -14  -1 143.907  37.474   5
   0  14   1 164.136  15.986   1
   0  14   1 187.465  33.815   4
  -1 -14  -1 -15.253   8.691   1
  -1 -14  -1 -12.405  18.096   5
   1  14   1 -23.876  14.580   1
   1  14   1 -0.0905  1.4331   2
  -2 -14  -1 140.890  14.116   1
   2  14   1 144.755  17.094   1
  -3 -14  -1 67.4546 16.6905   5
  -3 -14  -1 83.5955  9.6341   1
   3  14   1 65.6849  8.6090   1
  -4 -14  -1 89.6594 28.9239   5
   4  14   1 90.5334 35.8167   4
   4  14   1 68.8219  6.5641   2
  -5 -14  -1 117.411  15.694   1
   5  14   1 133.623  12.365   1
   5  14   1 137.165  13.444   4
   5  14   1 99.3985 10.0632   2
  -6 -14  -1 464.994  35.146   1
   6  14   1 402.411  41.816   2
   6  14   1 511.327  39.637   3
  -7 -14  -1 -1.8263  9.9016   1
  -7 -14  -1  5.9766 80.8362   5
   7  14   1 4.24146 9.32823   3
   7  14   1 -2.5903  3.0809   2
   7  14   1 2.63451 5.87932   1
  -8 -14  -1 104.252  14.475   1
  -8 -14  -1 97.2478 38.4542   5
   8  14   1 122.356  10.229   2
   8  14   1 99.6044 12.6410   3
   8  14   1 88.6593 10.3014   1
  -9 -14  -1 73.3598 28.2250   5
   9  14   1 130.579  11.160   2
   9  14   1 108.022  11.449   1
 -10 -14  -1 77.5851 11.6650   5
  10  14   1 97.1976  9.5816   1
  10  14   1 58.7221 12.1515   3
  11  14   1 4.65347 4.77852   1
  11  14   1 -4.8223  6.8904   3
 -12 -14  -1 145.360  17.385   5
  12  14   1 128.621  12.511   1
 -13 -14  -1 -10.213  10.166   5
  13  14   1 4.04595 4.27313   1
  13  14   1 7.70606 7.26327   3
 -14 -14  -1 -8.4590 15.8368   5
  14  14   1 0.78459 3.91723   1
  14  14   1 7.34515 4.97266   3
 -20  15   1 59.0993 10.3324   4
  19 -15  -1 -3.8563  4.2083   1
 -19  15   1 -2.1458  5.8443   4
  18 -15  -1 69.5361  7.9809   1
 -18  15   1 61.5551 10.1479   4
  17 -15  -1 93.3563  9.9068   1
  16 -15  -1 95.6982 11.1793   1
  15 -15  -1 17.4026  5.8828   1
  14 -15  -1 306.701  24.939   1
  13 -15  -1 26.6079  7.7623   1
 -13  15   1 17.9217  4.5476   1
  12 -15  -1 60.0172  9.0736   1
 -12  15   1 66.4916 10.6696   4
 -12  15   1 80.9212  8.5645   1
  11 -15  -1 15.4711  7.6115   1
 -11  15   1 30.4178  8.2542   4
 -11  15   1 23.2859  5.6164   1
  10 -15  -1 55.5262 10.3887   1
 -10  15   1 52.5668  9.6697   4
 -10  15   1 57.0036  7.4896   1
   9 -15  -1 16.9214  6.2475   1
  -9  15   1 24.9117 14.3276   4
  -9  15   1 16.8433  4.3182   1
   8 -15  -1 89.1438 15.4640   1
  -8  15   1 112.425  18.272   4
  -8  15   1 83.5409  9.9588   1
   7 -15  -1 -9.6863  6.0842   1
  -7  15   1 8.35289 7.08264   4
  -7  15   1 1.10904 4.60866   1
  -6  15   1 24.3719  5.7324   1
   5 -15  -1 864.456  59.675   1
  -5  15   1 779.746  67.638   4
   4 -15  -1 42.1517  8.3419   1
  -4  15   1 26.0513 11.5929   4
   3 -15  -1 896.268  79.311   5
   3 -15  -1 1120.79   74.66   1
  -3  15   1 1042.66   73.62   1
  -3  15   1 1098.82   85.34   4
   2 -15  -1 -40.320  53.961   5
   2 -15  -1 -9.5799  6.9129   1
  -2  15   1 13.2598 12.3171   1
   1 -15  -1 488.432  35.200   1
   1 -15  -1 403.699  37.311   5
  -1  15   1 476.814  34.324   1
   0 -15  -1 233.549  19.436   1
   0  15   1 197.778  18.397   1
  -1 -15  -1 0.30459 4.35575   1
   1  15   1 4.40763 5.20426   1
  -2 -15  -1 69.9389 18.2121   5
  -2 -15  -1 86.1262 13.9236   1
   2  15   1 109.673  17.289   4
  -3 -15  -1 8.85993 7.19768   1
  -3 -15  -1 -1.8235 13.2952   5
   3  15   1 -5.7941  4.1227   1
   4  15   1 245.215  24.595   2
   4  15   1 236.352  19.775   1
  -5 -15  -1 -8.7953  4.4632   1
   5  15   1 -2.0966  2.5534   2
   5  15   1 -8.7686  4.8579   4
   5  15   1 -7.2718  5.3757   1
  -6 -15  -1 2287.05  139.78   1
  -6 -15  -1 1708.37  160.45   5
   6  15   1 1658.28  152.79   2
   6  15   1 1809.65  236.38   3
   6  15   1 2249.24  137.88   1
  -7 -15  -1 6.14939 6.75686   1
  -7 -15  -1  2.4020 14.0010   5
   7  15   1 -0.7248  4.9456   1
   7  15   1 -4.8894  9.4409   3
   7  15   1 -2.8509  2.9732   2
   8  15   1 177.323  15.140   2
   8  15   1 156.848  18.159   3
   8  15   1 208.385  16.576   1
   9  15   1 75.3582  8.9748   1
   9  15   1 62.3324 10.5854   3
  10  15   1 -10.505   8.282   3
  10  15   1 -3.1361  5.3328   1
 -11 -15  -1 -4.4312  9.7087   5
  11  15   1 -3.2097 12.9766   3
 -12 -15  -1 68.6294 13.3479   5
  12  15   1 52.9607 10.7511   3
  12  15   1 76.8074  8.6421   1
  13  15   1 20.6790  7.6016   3
  19 -16  -1 5.15076 4.24296   1
  18 -16  -1 17.5898  5.3539   1
 -18  16   1 -2.5457  8.2084   4
  17 -16  -1 0.12461 4.74596   1
 -17  16   1 -7.9808  7.9363   4
  16 -16  -1 12.8309  5.4292   1
 -16  16   1 6.22568 7.60027   4
 -15  16   1 12.4829  7.3952   4
  14 -16  -1 224.561  19.243   1
  13 -16  -1 82.1577 13.1657   1
 -13  16   1 89.9905  9.8956   1
  12 -16  -1 106.756  12.076   1
 -12  16   1 101.588  10.646   1
  11 -16  -1 203.244  18.139   1
 -11  16   1 189.459  16.677   1
  10 -16  -1 2.78931 6.86516   1
 -10  16   1  0.7957 14.2424   4
 -10  16   1 9.21226 4.25104   1
   9 -16  -1 405.069  31.703   1
  -9  16   1 412.013  30.687   1
  -9  16   1 386.225  35.192   4
   8 -16  -1 31.6002 15.5125   1
  -8  16   1 34.0957  6.6340   1
  -8  16   1 39.3509  8.6691   4
   7 -16  -1 -0.5912  9.2053   1
  -7  16   1 -2.1625  7.6747   4
  -7  16   1 -0.2798  5.0939   1
   6 -16  -1 2.10127 9.95325   1
  -6  16   1 6.05350 5.74930   1
   5 -16  -1 292.969  22.436   1
  -5  16   1 238.326  20.937   1
  -5  16   1 255.231  25.564   4
   4 -16  -1 -15.749   9.550   5
   4 -16  -1 2.89433 6.32383   1
  -4  16   1 3.06144 3.92338   1
   3 -16  -1 -8.0275  8.4680   5
   3 -16  -1 -8.1848  6.2874   1
  -3  16   1 -2.1956  5.2724   1
  -3  16   1 -15.586  12.961   4
   2 -16  -1 82.8749 11.7787   5
   2 -16  -1 83.7030 16.0870   1
  -2  16   1 110.044  10.760   1
  -2  16   1 112.225  64.778   4
   1 -16  -1 115.498  13.419   1
   1 -16  -1 82.2321 34.0438   5
  -1  16   1 137.108  12.779   1
  -1  16   1 141.834  23.651   4
   0 -16  -1 372.929  29.807   1
  -1 -16  -1 126.863  35.604   5
  -1 -16  -1 177.302  15.825   1
   1  16   1 128.045  18.179   4
   1  16   1 167.520  14.714   1
  -2 -16  -1  3.2837 18.7527   5
  -3 -16  -1 827.573  59.642   1
   3  16   1 817.418  67.044   4
   3  16   1 787.494  58.640   1
  -4 -16  -1 510.495  39.689   1
   4  16   1 517.736  39.697   1
  -5 -16  -1 120.903  13.409   1
   5  16   1 115.728  12.673   1
  -6 -16  -1 -10.631   8.523   1
  -6 -16  -1 -3.3238  9.6323   5
   6  16   1  0.6110 18.5316   1
   6  16   1 -9.1090 41.4861   3
  -7 -16  -1 97.3216 11.7577   1
   7  16   1 95.2697 13.8450   3
   7  16   1 122.250  12.050   1
   8  16   1 29.2737  7.7012   1
  -9 -16  -1 82.2801 13.7626   5
   9  16   1 61.7270 11.3951   3
  10  16   1 90.7248 10.3404   1
 -11 -16  -1 50.7785 11.5533   5
  11  16   1 30.3314  6.8774   1
  12  16   1 26.1007  8.6457   3
  19 -17  -1 -7.0969  5.2860   1
 -19  17   1 -0.7823  9.1053   4
  18 -17  -1 49.8629  7.7313   1
  17 -17  -1 -1.5611  5.5182   1
  16 -17  -1 5.62747 7.13277   1
  15 -17  -1 180.100  16.901   1
  14 -17  -1 16.2501  7.4841   1
  13 -17  -1 19.1373  7.6521   1
 -12  17   1 48.0412  7.7288   1
  11 -17  -1 219.591  19.730   1
 -11  17   1 209.989  18.277   1
  10 -17  -1 266.146  26.922   1
 -10  17   1 252.678  21.287   1
   9 -17  -1 205.494  23.615   1
  -9  17   1 220.258  18.450   1
  -8  17   1 34.2832  7.4301   1
  -8  17   1 53.1008 14.6567   4
   7 -17  -1 4.31013 5.47124   1
  -7  17   1 0.55769 5.23546   1
  -7  17   1 1.32476 6.91755   4
   6 -17  -1 4.96585 7.32971   1
  -6  17   1 -1.3253  9.5447   1
  -6  17   1 1.11924 7.79804   4
   5 -17  -1 115.013  12.925   1
   5 -17  -1 91.9513 13.6878   5
  -5  17   1 75.7425 13.3163   4
  -5  17   1 106.135  10.950   1
   4 -17  -1 5.44350 7.39578   1
   4 -17  -1 24.7317 16.5375   5
  -4  17   1 -8.7426 19.4475   4
  -4  17   1 15.6343  6.9937   1
   3 -17  -1 5.42645 5.50761   1
   3 -17  -1 -2.6955  8.7414   5
  -3  17   1 1.87941 4.53937   1
   2 -17  -1 66.1177 10.9459   1
  -2  17   1 66.4450 12.9272   4
  -2  17   1 84.6606 10.2671   1
   1 -17  -1 -4.0120  5.5287   1
   1 -17  -1 -27.475  32.888   5
  -1  17   1 -2.1848  4.3967   1
  -1  17   1 -0.6651 13.8620   4
   0 -17  -1  1.2253 10.6735   1
   0 -17  -1 -19.410  47.996   5
  -1 -17  -1 284.948  25.300   1
   1  17   1 265.801  22.733   1
   1  17   1 289.656  27.289   4
  -2 -17  -1 89.9411 16.6898   1
   2  17   1 104.537  14.695   4
   3  17   1 46.8063  8.6316   1
  -4 -17  -1 411.427  37.567   5
   4  17   1 467.889  34.197   1
  -5 -17  -1 10.9204  6.9831   1
   5  17   1 25.7803  7.5455   1
  -6 -17  -1 188.839  18.366   1
   6  17   1 199.710  17.669   1
   7  17   1 95.2787 12.8583   3
   7  17   1 117.629  12.154   1
   8  17   1 128.071  15.717   3
   9  17   1 58.2466  8.8077   1
 -10 -17  -1 -6.5484 10.0945   5
  10  17   1 -11.551   7.583   3
  10  17   1 1.98034 5.72946   1
 -11 -17  -1 -19.187  11.284   5
  11  17   1 -4.1279  4.8789   1
  18 -18  -1 -1.7631  5.3293   1
  17 -18  -1 24.3043  7.2764   1
  16 -18  -1 118.786  13.427   1
  14 -18  -1 9.37628 7.23698   1
  13 -18  -1 21.7729  8.3535   1
  12 -18  -1 270.670  23.432   1
 -12  18   1 246.543  21.280   1
  11 -18  -1 29.6520  8.9859   1
 -11  18   1 12.0713  6.2130   1
 -11  18   1  3.9758 17.5028   4
  10 -18  -1 24.5150  6.9431   1
   9 -18  -1 247.619  20.555   1
  -9  18   1 204.985  18.619   1
   8 -18  -1 17.9189 19.2388   1
  -8  18   1 -1.6203  4.2435   1
  -8  18   1 -5.8060 11.1226   4
   7 -18  -1 309.177  27.345   1
  -7  18   1 333.730  30.544   4
   6 -18  -1 -2.4007  7.7845   1
  -6  18   1 1.49371 8.54264   4
   5 -18  -1 62.8748  9.4868   1
  -5  18   1 62.9774 17.9610   4
  -5  18   1 73.1514  9.6381   1
   4 -18  -1 0.59977 8.54402   1
   3 -18  -1 -1.1768 11.5532   1
   3 -18  -1 -20.798  21.782   5
  -3  18   1 6.44486 5.74638   1
  -3  18   1 -12.232   9.993   4
   2 -18  -1 97.5730 11.7385   1
  -2  18   1 86.1671 10.7982   1
  -1  18   1 43.0881  7.5556   1
   0 -18  -1  1.3230 16.4774   5
   0 -18  -1 11.3095  8.6354   1
   0  18   1 22.3171  6.9635   1
  -1 -18  -1 164.111  17.977   1
   1  18   1 231.392  22.803   4
   1  18   1 207.981  17.885   1
  -2 -18  -1 -15.514  50.266   5
   2  18   1 17.5037  5.7659   1
   3  18   1 59.3560  8.9931   1
  -4 -18  -1 264.450  22.802   1
  -4 -18  -1 214.446  24.278   5
   4  18   1 259.943  21.442   1
  -5 -18  -1 14.1422 30.4622   5
   5  18   1 11.8796  5.9533   1
   6  18   1 38.6373 11.9771   3
   6  18   1 27.7967  6.5062   1
   8  18   1 25.2065  9.2322   3
   8  18   1 34.3553  7.7889   1
  -9 -18  -1 -3.2226 11.0379   5
   9  18   1 13.9689  7.9139   3
  17 -19  -1 13.8904  5.9922   1
  16 -19  -1 89.2302 11.3101   1
  15 -19  -1 12.4658  6.9133   1
 -15  19   1 -0.6001  6.7454   4
  14 -19  -1 53.6334 10.4740   1
  13 -19  -1 29.6815  8.4530   1
  12 -19  -1 -3.2515 12.5948   1
 -12  19   1 3.07357 7.99693   4
  11 -19  -1 39.3610  7.9876   1
 -11  19   1 55.3955  8.2580   1
  10 -19  -1 121.398  13.961   1
 -10  19   1 109.313  11.853   1
  -9  19   1 36.9768  7.8433   1
   8 -19  -1 -1.8029  7.9646   1
  -8  19   1 26.0888  6.8359   1
   7 -19  -1 68.7205 11.3977   1
  -7  19   1 79.3165  9.8927   1
   6 -19  -1 -0.6466  7.9294   1
  -6  19   1 -1.4509  8.9770   4
  -6  19   1 6.09213 6.06891   1
   5 -19  -1 16.5161  8.1912   1
  -5  19   1 -25.101  19.022   4
  -5  19   1 7.39499 4.74954   1
   4 -19  -1 30.1214  7.4528   1
  -4  19   1 47.6607  7.9550   1
   3 -19  -1 110.373  13.483   1
  -3  19   1 113.729  11.617   1
  -3  19   1 74.3001 14.2883   4
   2 -19  -1 11.8071 10.6293   5
   2 -19  -1 -0.7459  7.5266   1
  -2  19   1 4.08037 4.50005   1
  -2  19   1 31.2596 11.5223   4
   1 -19  -1 -16.248  11.505   5
  -1  19   1 -7.7503  8.2528   4
   0 -19  -1 263.717  25.330   1
   0  19   1 347.337  25.514   1
  -1 -19  -1 45.4926 10.7331   1
   1  19   1 46.8282  8.3319   1
  -2 -19  -1 47.2361 10.2898   1
   2  19   1 61.1537  9.4096   1
  -3 -19  -1 -13.496  12.206   5
  -4 -19  -1 25.3221  8.5950   1
  -4 -19  -1 17.5674 10.4200   5
  -5 -19  -1 50.7400  9.9900   1
   5  19   1 52.4043  8.9144   1
   8  19   1 15.9855  8.0914   3
  16 -20  -1 11.7226  7.6425   1
  15 -20  -1 25.0989  9.2542   1
  14 -20  -1 -1.2149  5.3330   1
 -14  20   1 -12.862   8.695   4
  13 -20  -1 1.37480 7.93912   1
 -13  20   1 8.38027 8.98263   4
  12 -20  -1 79.4454 11.1933   1
 -12  20   1 87.1822 10.6040   1
  11 -20  -1 -11.991   8.607   1
 -10  20   1 8.00961 9.50191   4
 -10  20   1 3.67288 5.89143   1
  -9  20   1 21.0959  6.7610   1
   8 -20  -1 2.12017 8.44264   1
  -8  20   1 14.1353  6.4875   1
   7 -20  -1 29.7062  9.1700   1
  -7  20   1 19.9236 10.6018   4
  -7  20   1 19.3412  6.9028   1
   6 -20  -1 -14.155   9.493   1
  -6  20   1 0.29415 6.29095   1
   5 -20  -1 -0.7116  7.8101   1
  -5  20   1 -6.4864  6.1636   1
   4 -20  -1 -4.7753  7.7130   1
   4 -20  -1 -20.917  10.940   5
  -4  20   1 -5.8303  4.9117   1
   3 -20  -1 29.9925  9.1808   1
  -3  20   1 41.0262  7.9272   1
  -3  20   1 11.8109 19.2632   4
   2 -20  -1 100.049  13.674   1
  -2  20   1 102.918  11.727   1
   1 -20  -1 -11.909   7.856   1
   1 -20  -1 -5.1341 11.4209   5
  -1  20   1 2.91416 6.32763   1
   0  20   1 43.4504  7.5253   1
  -1 -20  -1 99.6616 13.5994   1
   1  20   1 111.510  12.594   1
  -2 -20  -1 60.5060 18.7852   5
  -3 -20  -1 3.42280 8.19723   1
  -3 -20  -1 -13.618  13.997   5
  -4 -20  -1 -4.6688  5.7351   1
  -5 -20  -1  6.5726 15.4365   5
  -6 -20  -1 21.7620 19.7461   5
  14 -21  -1 6.67452 8.63734   1
 -13  21   1 166.515  18.757   4
  11 -21  -1 52.2936 11.2202   1
 -11  21   1 49.7598  8.7130   1
 -10  21   1 56.1614  9.3767   1
   9 -21  -1 179.458  17.781   1
  -9  21   1 203.865  17.156   1
  -9  21   1 146.839  18.903   4
   8 -21  -1 -4.8065  6.3487   1
  -8  21   1 -7.9177  9.8015   4
  -8  21   1 -3.7273  6.1300   1
   7 -21  -1 61.7940 10.0788   1
  -7  21   1 70.2201  9.6770   1
  -7  21   1 61.2687 11.6760   4
   6 -21  -1 13.6514 10.7121   1
  -6  21   1 22.2092  7.1008   1
  -6  21   1  0.0898 10.8776   4
   5 -21  -1 12.8093  9.0684   1
  -5  21   1 26.3162  7.0525   1
  -4  21   1 28.2156 14.2332   4
   3 -21  -1 -21.132  11.003   5
   3 -21  -1 4.03159 6.14561   1
   2 -21  -1 -3.8321  9.0732   5
   1 -21  -1  2.2343 10.4902   5
  -1 -21  -1  3.6852 12.1633   5
  -2 -21  -1 -8.9773  6.8371   1
   3  21   1 85.1430 10.7598   1
  -4 -21  -1 12.6934 20.8492   5
  -9  22   1 54.0922  8.2718   1
  -9  22   1 64.7490 13.5472   4
  -8  22   1 1.98521 4.98656   1
  -8  22   1 -8.3503  9.3119   4
  -7  22   1 40.6273 13.2821   4
   6 -22  -1  3.7496 10.7610   1
  -6  22   1 -6.9762 12.0642   4
  -3  22   1 98.4934 11.1696   1
  -1  22   1 16.7761  5.7120   1
  -1 -22  -1 203.181  19.923   1
  -7  23   1  3.9667 10.8975   4
  -6  23   1 -3.2501  5.2429   1
   5 -23  -1 8.89825 7.23865   1
   2 -23  -1 50.4426  9.6579   1
   2 -23   2 43.1368  9.1117   1
   4 -23   2  9.6276 10.7095   5
   5 -23   2 12.4570  6.9688   1
   5 -23   2 22.1259 10.7659   5
  -9  23  -2 7.27208 7.93075   4
  -2 -22   2 -25.497  13.415   5
   1  22  -2 39.7714  7.6937   1
  -1 -22   2 19.8439 24.2352   5
   0 -22   2 38.3571 13.1064   5
   1 -22   2 -0.7703 12.1318   5
   2 -22   2 25.6589  7.9330   1
   4 -22   2 57.5945 13.1039   5
   5 -22   2 -15.269   7.345   1
   5 -22   2 -3.9994  9.6512   5
  -7  22  -2 -10.416  12.859   4
  -8  22  -2 29.6873 10.0107   4
  -9  22  -2 -3.7716  8.5078   4
 -10  22  -2 55.8438 11.2061   4
 -11  22  -2 2.06511 5.91992   4
  12 -22   2 6.15733 6.57548   1
  -5 -21   2 9.66847 9.60647   5
  -4 -21   2 -15.425  14.601   5
  -3 -21   2 87.8263 15.6353   5
   0 -21   2 -8.4559 10.2681   5
   2 -21   2 -16.172  10.776   5
   3 -21   2 91.1411 14.2071   5
   4 -21   2 -9.6256  9.0878   5
   5 -21   2 43.4065  8.6558   1
  -6  21  -2 72.6339 13.1771   4
  -7  21  -2 16.2570  8.8243   4
  -8  21  -2 14.2361 14.6234   4
  -9  21  -2 4.98898 7.90961   4
 -10  21  -2 4.98530 7.81304   4
 -11  21  -2 -1.6470  4.4254   1
 -11  21  -2 3.92325 7.85580   4
 -14  21  -2 5.29521 7.37639   4
  14 -21   2 -4.8874  5.8788   1
  -7 -20   2 -13.390  13.188   5
   6  20  -2 3.05056 5.49536   1
   2  20  -2 6.01110 5.35766   1
  -1 -20   2 1.61268 9.40271   5
  -1 -20   2 10.5694  6.0977   1
   0 -20   2 32.2207  9.4645   5
   1 -20   2  0.5190 10.1335   5
   2 -20   2 224.859  20.448   1
   3 -20   2  6.7766 19.6972   5
   4 -20   2 -5.7925 18.0038   5
  -6  20  -2 9.41359 8.63214   4
  -6  20  -2 21.7750  6.2668   1
   6 -20   2  0.3169 29.6679   5
  -7  20  -2 -18.265  11.018   4
   7 -20   2 -13.696   9.347   1
  -8  20  -2 237.391  19.637   1
   8 -20   2 202.946  20.785   1
  -9  20  -2 -0.9950  5.7001   1
   9 -20   2 0.66685 8.27969   1
 -10  20  -2 15.1159  5.9295   1
  10 -20   2 2.35035 7.71314   1
 -11  20  -2 1.90344 5.05132   1
 -11  20  -2 0.60477 7.85968   4
  11 -20   2 -1.3290  6.7515   1
 -12  20  -2 25.7181  6.9751   1
  12 -20   2 18.1090  8.6735   1
 -13  20  -2 -3.3354  5.8271   4
  13 -20   2 -10.567   7.906   1
  14 -20   2 75.4473 11.2783   1
  15 -20   2 79.4628 11.6550   1
  16 -20   2 1.42985 6.99225   1
  -8 -19   2 -2.6023  9.0584   5
  -7 -19   2 -2.8532  7.5392   5
   5  19  -2 17.2961  6.0011   1
   5  19  -2 17.0665  6.0693   3
  -5 -19   2 2.37118 9.78010   5
   4  19  -2 22.9378  6.9723   1
  -4 -19   2 42.4910  9.2678   1
   3  19  -2 13.8000  6.5291   1
  -3 -19   2 10.7885 10.5788   5
   2  19  -2 -0.8771  4.7892   1
  -2 -19   2 -0.5310  7.0390   1
   1  19  -2 111.935  11.671   1
  -1 -19   2 79.6522 18.7628   5
  -1 -19   2 78.8543 11.2102   1
   0  19  -2 176.368  16.738   1
   0 -19   2 193.351  18.525   1
   1 -19   2  5.5558 10.1988   1
   1 -19   2 2.62154 9.64392   5
  -2  19  -2 17.9457  6.4758   1
   2 -19   2 7.76417 6.17187   1
   2 -19   2 -6.9216 10.3621   5
  -3  19  -2 1.34888 7.42422   4
   3 -19   2 -4.4269 13.7610   1
   3 -19   2  7.0313 29.7833   5
  -4  19  -2 195.207  18.121   1
  -4  19  -2 240.247  22.056   4
   4 -19   2 192.323  19.854   1
  -5  19  -2 20.8213  7.8582   4
  -5  19  -2 23.3188  5.8078   1
   5 -19   2 27.8026  8.0071   1
   5 -19   2 17.3562 23.7713   5
  -6  19  -2 227.670  19.588   1
  -6  19  -2 210.006  23.542   4
   6 -19   2 270.967  27.240   1
  -7  19  -2 65.4519 14.8720   4
   7 -19   2 64.5372 14.5858   1
  -8  19  -2 21.5256  8.4639   4
  -8  19  -2 15.7911  6.4847   1
   8 -19   2  3.3566 13.2424   1
  -9  19  -2 133.676  13.574   1
 -10  19  -2 39.5446  7.1181   1
 -11  19  -2 7.58205 5.88374   1
  11 -19   2 3.12340 5.92151   1
 -12  19  -2 8.53665 7.65864   4
 -12  19  -2 -1.7166  5.6150   1
 -13  19  -2 -0.4036  7.1105   4
  13 -19   2 -2.5137  7.1755   1
  14 -19   2 125.768  14.289   1
 -15  19  -2 -1.4460  7.2968   4
  15 -19   2 6.65963 5.27757   1
 -16  19  -2 -2.7734  5.4530   4
  16 -19   2 9.87181 6.60948   1
  17 -19   2 20.4183  9.3988   1
 -10 -18   2 38.5757 12.1105   5
   8  18  -2 7.24164 6.31701   1
   7  18  -2 192.315  17.741   1
   6  18  -2 47.5092  8.1341   3
   5  18  -2 30.1727  8.3622   3
   4  18  -2 128.270  12.989   1
   3  18  -2 86.5519 10.4477   1
  -2 -18   2 21.0261  8.3191   1
  -1 -18   2 24.3380  7.0253   1
  -1 -18   2 41.5873  9.2581   5
   0  18  -2 4.15049 6.29123   1
   0 -18   2 1.51181 9.01441   1
   0 -18   2 3.95380 6.57170   5
   1 -18   2 9.06617 7.97357   1
   1 -18   2 -5.9450  9.5861   5
  -2  18  -2 76.6332 12.0718   4
  -2  18  -2 101.158  10.810   1
   2 -18   2 101.416  12.440   1
  -3  18  -2 75.3560  9.3703   1
   3 -18   2 63.0446 10.5960   1
  -4  18  -2 59.5000  8.5713   1
  -4  18  -2 68.8973 11.7310   4
   4 -18   2 56.5679 10.2806   1
  -5  18  -2 -5.0001  4.3506   1
  -5  18  -2 9.50034 7.03889   4
   5 -18   2 -6.5521  7.3497   1
  -6  18  -2 88.7305 11.8020   4
  -6  18  -2 79.2065  9.7482   1
   6 -18   2 66.2662 12.4287   5
   6 -18   2 95.6113 14.6941   1
  -7  18  -2 19.4053  8.3254   4
  -8  18  -2 -4.5692  7.8950   4
   8 -18   2  3.9989 13.9795   1
   9 -18   2 -11.725  26.100   1
 -10  18  -2 8.09519 4.71746   1
  10 -18   2 -7.4346  8.4313   1
 -11  18  -2 -11.133   7.799   4
  11 -18   2 5.50061 5.80957   1
 -12  18  -2 41.4611  7.5862   1
  12 -18   2 32.8329 14.4236   1
 -13  18  -2 26.9246  7.1022   4
 -14  18  -2 -10.851   7.844   4
  14 -18   2 -15.462   8.050   1
 -15  18  -2 25.7253  7.3609   4
  15 -18   2 34.6372  8.2730   1
 -16  18  -2 5.41301 8.07236   4
  16 -18   2 12.4510  6.0339   1
 -17  18  -2 7.18527 7.65133   4
  17 -18   2 7.27371 5.35121   1
  18 -18   2 123.198  13.338   1
 -11 -17   2  2.0092 10.3036   5
  10  17  -2 48.1655  8.3096   1
 -10 -17   2 61.3652 12.9382   5
   9  17  -2 28.8996  6.3362   1
   8  17  -2 8.10533 5.92959   3
  -8 -17   2 -18.851  10.680   5
   7  17  -2 22.0496  5.9435   3
   7  17  -2 21.2873  6.4637   1
  -7 -17   2  9.8545 10.2542   5
   6  17  -2 2.35412 6.02283   3
  -6 -17   2 -1.8053  7.6565   5
   5  17  -2 -5.0073  5.0387   3
  -5 -17   2 -5.3090  5.7940   1
   4  17  -2 25.7317  6.8668   1
  -4 -17   2 14.3175  7.1802   1
   3  17  -2 117.400  11.693   1
   2  17  -2 4.19697 4.59373   1
  -2 -17   2 0.56681 6.36950   1
   1  17  -2 104.585  10.610   1
  -1 -17   2 87.4021 17.5111   5
  -1 -17   2 72.0154 10.3129   1
   0  17  -2 50.3053 14.9999   4
   0  17  -2 72.6753  9.1494   1
   0 -17   2 62.2949 13.4366   1
   0 -17   2 52.0529 11.7266   5
  -1  17  -2 45.6222 17.6126   4
  -1  17  -2 55.7104  8.8520   1
   1 -17   2 40.3819 14.6941   1
  -2  17  -2 108.829  13.659   4
  -2  17  -2 109.780  11.388   1
  -3  17  -2 7.71388 8.41175   4
   3 -17   2 4.79500 7.25046   1
  -4  17  -2 24.6707 18.0031   4
   4 -17   2 23.7415 10.4984   1
   4 -17   2 19.5364 10.7114   5
  -5  17  -2 7.56860 4.23961   1
  -5  17  -2  7.5452 16.8840   4
   5 -17   2 15.6162 11.6396   1
  -6  17  -2 36.2292  8.2472   4
  -6  17  -2 42.4733  7.0421   1
   6 -17   2 24.9015  7.2826   5
   6 -17   2 30.6450  8.2051   1
  -7  17  -2 -0.7011  5.4165   1
   7 -17   2  3.8030 11.7010   1
  -8  17  -2 -6.9679  6.0246   1
   8 -17   2 -2.2505  9.2429   1
  -9  17  -2 4.85825 5.38850   1
  -9  17  -2 1.08704 5.40558   4
   9 -17   2 -9.7522  8.7581   1
 -10  17  -2 29.1588  5.6763   1
  10 -17   2 29.1446 12.0736   1
 -11  17  -2 -1.8676  5.2237   1
 -11  17  -2 -13.340  10.751   4
  11 -17   2 4.74857 6.40103   1
 -12  17  -2 93.7099 10.6944   1
  12 -17   2 103.971  15.570   1
 -13  17  -2 1.41367 8.17705   4
 -13  17  -2 -1.2668  4.5655   1
  13 -17   2 -2.4833  4.8526   1
  14 -17   2 13.5307  7.2487   1
  15 -17   2 106.133  12.222   1
  16 -17   2 29.1264  7.5883   1
  17 -17   2 6.51648 5.88977   1
  18 -17   2 13.3454  6.6441   1
  19 -17   2 6.95045 5.24951   1
 -13 -16   2 -12.277  19.705   5
  12  16  -2 0.73173 4.41985   1
 -12 -16   2 -8.8709  9.9194   5
  11  16  -2 89.8511 10.2216   1
 -11 -16   2 112.170  17.378   5
  10  16  -2 149.422  13.977   2
  10  16  -2 137.601  22.529   1
   9  16  -2 33.8750  5.5739   2
   9  16  -2 24.5701  6.4760   3
   9  16  -2 27.9484  6.9660   1
  -9 -16   2  7.4768 14.4494   5
   8  16  -2 33.6285  6.8543   1
   8  16  -2 19.5630  4.8235   2
   7  16  -2 86.3783  8.8740   2
   7  16  -2 99.7950 10.3638   1
   7  16  -2 70.4649 10.1190   3
   6  16  -2 -4.9490  6.4114   1
   6  16  -2 -1.3944  3.5153   2
   5  16  -2 179.901  20.684   3
   5  16  -2 212.872  17.344   1
  -5 -16   2 174.086  17.455   1
   4  16  -2 397.993  33.563   2
  -4 -16   2 428.701  32.508   1
   3  16  -2 162.769  15.048   2
   3  16  -2 222.852  16.721   1
  -3 -16   2 185.574  16.866   1
   2  16  -2 360.844  26.405   1
  -2 -16   2 313.676  26.653   1
   1  16  -2 41.2735 10.9625   4
   1  16  -2 32.0911  6.7704   1
   0  16  -2 24.6846  5.4421   2
   0 -16   2 29.4570  7.1783   5
   0 -16   2 35.4588  7.9348   1
  -1  16  -2 51.4037  7.4233   1
  -1  16  -2 23.2993 49.2048   4
   1 -16   2 37.1787  8.1201   1
  -2  16  -2 251.517  26.292   4
  -2  16  -2 286.033  21.455   1
   2 -16   2 255.554  21.792   1
  -3  16  -2 32.6571  8.5761   2
  -3  16  -2 39.7664 10.3981   4
   3 -16   2 49.6237  9.0593   5
   3 -16   2 38.4738  9.9980   1
  -4  16  -2 -0.4567  9.0452   4
  -4  16  -2 2.06554 2.01926   2
  -4  16  -2 5.37471 4.97102   1
   4 -16   2 -6.0957  6.6808   1
   4 -16   2 6.55125 7.93997   5
  -5  16  -2 1.41774 4.37863   1
   5 -16   2 -17.961  15.768   1
   5 -16   2 -7.7768  7.4285   5
  -6  16  -2 49.8394 17.4525   4
  -6  16  -2 72.5521  8.3581   1
   6 -16   2 55.2237 12.7099   5
   6 -16   2 71.9395 10.7300   1
  -7  16  -2 26.0427  6.4098   1
   7 -16   2 39.8796  9.9318   1
  -8  16  -2 20.8584  5.9682   1
   8 -16   2 26.8272 12.1498   1
  -9  16  -2 20.9852  9.7421   4
   9 -16   2 15.1111  8.6766   1
 -10  16  -2 60.3017  7.7304   1
  10 -16   2 71.8209 10.6781   1
 -11  16  -2 16.5798  5.4547   1
  11 -16   2 19.1979 11.9027   1
 -12  16  -2 530.000  39.104   1
  12 -16   2 523.173  39.858   1
 -13  16  -2 97.4044  9.9838   1
  13 -16   2 70.7994 14.6124   1
 -14  16  -2 -3.9387  8.5395   4
  14 -16   2 15.6741  6.7360   1
 -15  16  -2 56.0698  9.4169   4
  15 -16   2 72.7099  9.5931   1
  16 -16   2 204.999  19.026   1
  17 -16   2 16.6373  5.7806   1
  18 -16   2 88.5805 10.2557   1
  13  15  -2 -2.0573  5.1997   2
  13  15  -2 1.08711 3.77255   1
  12  15  -2 1.81196 6.22620   3
  12  15  -2 1.44183 4.49168   1
 -12 -15   2 1.16334 7.03466   5
  11  15  -2 35.0375  6.5189   1
  11  15  -2 23.9544  7.5961   3
  11  15  -2 40.8832  6.7729   2
 -11 -15   2 32.7206  9.0760   5
  10  15  -2 57.4295  8.2920   1
  10  15  -2 62.5782  7.9356   2
 -10 -15   2 70.8598 12.3289   5
   9  15  -2 5.83501 3.80956   2
   9  15  -2 8.31739 5.33324   3
   8  15  -2 -3.0000  4.7482   3
   8  15  -2 3.58831 4.17219   1
  -8 -15   2 -6.8785  8.2982   5
   7  15  -2 5.57590 5.60197   1
   7  15  -2 9.15077 4.11128   2
   7  15  -2 0.91279 5.16843   3
  -7 -15   2 9.97615 8.92749   5
  -7 -15   2 -1.5422  5.4470   1
   6  15  -2 13.0290  4.2565   2
   6  15  -2 18.5887  6.0344   3
   5  15  -2 111.316  11.462   2
   5  15  -2 141.592  17.460   3
  -5 -15   2 150.671  19.257   1
  -5 -15   2 111.462  23.600   5
  -4 -15   2 127.643  13.415   1
  -3 -15   2 15.1334  5.7586   1
   2  15  -2 17.1468  3.5560   2
  -2 -15   2 29.4084 10.8468   5
   1  15  -2 -4.7153  5.2852   1
   1  15  -2 -0.2580  2.5200   2
  -1 -15   2 -4.1989  4.7951   1
  -1 -15   2  6.9628 10.0706   5
   0  15  -2 43.0151  6.9685   1
   0  15  -2 11.8323 19.7469   4
   0  15  -2 28.8493  3.9865   2
   0 -15   2 38.5296  7.6218   5
   0 -15   2 41.6831 10.2414   1
   1 -15   2 0.36312 7.81790   5
   1 -15   2 10.9944 10.0310   1
  -2  15  -2 529.151  51.499   4
  -3  15  -2 66.0349  7.9834   1
  -3  15  -2 46.0910 10.2070   4
   3 -15   2 49.8705 26.5204   5
   3 -15   2 81.7495 17.4942   1
  -4  15  -2 151.871  12.662   1
   4 -15   2 116.843  12.600   1
   4 -15   2 135.398  16.895   5
  -5  15  -2 13.4792  5.3923   1
  -5  15  -2 33.1973 13.9010   4
   5 -15   2 1.52588 7.57941   5
   5 -15   2 9.68975 7.33234   1
  -6  15  -2 450.957  44.374   4
  -6  15  -2 593.942  39.518   1
   6 -15   2 559.257  40.099   1
  -7  15  -2 81.3098  8.7991   1
  -7  15  -2 61.8001 11.2510   4
   7 -15   2 74.8519 15.2145   1
  -8  15  -2 286.937  26.863   4
  -8  15  -2 301.730  23.544   1
   8 -15   2 313.424  24.405   1
  -9  15  -2 94.5058 11.0592   4
  -9  15  -2 76.9259  9.0286   1
   9 -15   2 78.6642 10.2399   1
 -10  15  -2 62.3880  9.2985   4
 -10  15  -2 40.0644  6.1020   1
  10 -15   2 56.6923  9.0461   1
 -11  15  -2 11.5689  4.8879   1
  11 -15   2 25.1040  6.7451   1
 -12  15  -2 136.887  12.754   1
  12 -15   2 143.866  13.886   1
 -13  15  -2 20.7358  5.2447   1
  13 -15   2 17.1347  6.7911   1
  14 -15   2 29.1819  8.6444   1
  15 -15   2 66.4569  8.2233   1
  16 -15   2 49.0772  7.6251   1
  17 -15   2 95.6718 10.6931   1
  18 -15   2 63.0674  8.1034   1
 -19  15  -2 -0.5548  8.1668   4
  19 -15   2 -2.4457  4.4102   1
 -15 -14   2 12.3093 25.8833   5
  14  14  -2 50.2612  8.2807   2
  13  14  -2 65.4570  8.8843   3
  13  14  -2 68.3694  8.0613   1
  13  14  -2 62.1433  8.6312   2
 -13 -14   2 81.3779 11.6805   5
  12  14  -2 -0.0011  4.1604   1
  12  14  -2 -2.7527  4.0391   3
  12  14  -2 -0.7894  4.8692   2
  11  14  -2 5.74093 4.39450   1
  11  14  -2 4.05400 4.47413   2
  11  14  -2 1.20193 4.35631   3
 -11 -14   2 -14.446   9.354   5
  10  14  -2 12.4722  5.0645   2
  10  14  -2 20.1212  4.9972   1
   9  14  -2 24.7191  5.6854   1
   9  14  -2 22.9621  5.1115   2
   9  14  -2 15.7715  5.8431   3
   8  14  -2 21.5878  6.3647   3
   8  14  -2 28.6176  5.7624   2
   7  14  -2 106.703  11.999   3
   7  14  -2 112.194  10.851   2
   7  14  -2 105.295  11.454   1
  -7 -14   2 134.806  12.262   1
   6  14  -2 256.225  21.173   3
   6  14  -2 275.263  19.909   1
   6  14  -2 226.326  21.265   2
  -6 -14   2 241.182  49.006   5
  -6 -14   2 195.728  19.216   1
   5  14  -2 128.347  13.278   3
   5  14  -2 122.446  11.928   1
  -5 -14   2 133.555  13.040   1
  -5 -14   2 74.6921 27.0910   5
   4  14  -2 0.67842 5.07832   1
   4  14  -2 3.02841 4.28374   2
  -4 -14   2  9.6285 23.3016   5
   3  14  -2 83.0698  7.8080   2
  -3 -14   2 82.8327  9.2836   1
   2  14  -2 -20.550  30.885   4
  -2 -14   2  8.3742 21.7086   5
  -2 -14   2 2.38863 6.06701   1
   1  14  -2 68.8207 10.5482   2
   1  14  -2 71.0191 22.8384   4
  -1 -14   2 76.0582 10.8348   1
  -1 -14   2  85.435 171.672   5
   0  14  -2 2596.33  174.43   1
   0  14  -2 2669.92  212.38   4
   0 -14   2 2306.04  181.52   1
  -1  14  -2  0.1815 10.0471   1
  -1  14  -2 -2.4704  6.5478   2
   1 -14   2 10.6637 16.5949   1
  -2  14  -2 277.617  24.462   4
  -2  14  -2 264.489  43.928   2
  -3  14  -2 120.830  11.726   1
   3 -14   2 87.6358 28.8803   5
   3 -14   2 129.058  12.754   1
  -4  14  -2 -15.245  11.496   4
  -4  14  -2 3.11131 5.00766   1
   4 -14   2 -10.515  20.301   5
   4 -14   2 4.04827 8.85265   1
  -5  14  -2 123.176  11.580   1
  -5  14  -2 103.384  23.802   4
   5 -14   2 117.583  13.626   1
   5 -14   2 124.241  13.685   5
  -6  14  -2 434.307  32.021   1
   6 -14   2 409.735  34.846   5
   6 -14   2 440.028  32.704   1
  -7  14  -2 -17.096  27.719   4
   7 -14   2  9.5651 27.6801   1
   7 -14   2 -8.0403 10.5525   5
  -8  14  -2 200.009  30.036   4
  -8  14  -2 252.487  19.315   1
   8 -14   2 247.651  28.231   1
  -9  14  -2 94.2760  9.4863   1
  -9  14  -2 88.4624 14.0043   4
   9 -14   2 67.1184 12.0508   1
 -10  14  -2 -5.0663 19.9612   4
 -10  14  -2 -0.4092  3.3282   1
  10 -14   2 18.0701  9.0897   1
 -11  14  -2 19.9706 12.9378   4
  11 -14   2 -14.110  11.070   1
 -12  14  -2 124.385  11.905   1
 -12  14  -2 152.308  15.051   4
  12 -14   2 130.941  15.656   1
 -13  14  -2 187.975  15.724   1
  13 -14   2 183.814  19.260   1
  14 -14   2 325.742  25.701   1
 -15  14  -2 -2.7009  6.3910   4
  15 -14   2 -6.0738  5.2713   1
 -16  14  -2 78.8941 11.3762   4
  16 -14   2 95.5496 10.1798   1
 -17  14  -2 320.365  29.627   4
 -18  14  -2 -3.7609  6.2261   4
  18 -14   2 -4.2443  6.3508   1
 -19  14  -2 34.8159  8.6381   4
  19 -14   2 47.1851  6.3025   1
 -21  14  -2 -2.3516  9.5418   4
 -15 -13   2 -10.276  17.494   5
  14  13  -2 25.3672  6.5868   2
  14  13  -2 7.58803 5.14544   3
  13  13  -2 1.08025 4.78690   3
  13  13  -2 -1.6024  4.1192   1
  13  13  -2 5.07244 5.69893   2
  12  13  -2 4.03238 4.03128   1
 -12 -13   2 -1.1649  8.4632   5
  11  13  -2 -0.4826  3.9189   1
  11  13  -2 4.51263 4.63746   2
  11  13  -2 -9.1614  5.4731   3
  10  13  -2 237.314  23.218   3
  10  13  -2 305.658  22.692   2
  10  13  -2 263.860  21.222   1
   9  13  -2 71.3084  9.2383   3
   9  13  -2 81.1650  9.0708   1
   9  13  -2 85.7796  9.1173   2
   8  13  -2 56.6174  8.8476   2
   8  13  -2 46.3557  7.9723   3
   8  13  -2 51.2920 10.3624   1
  -8 -13   2 42.6325 22.6290   5
  -8 -13   2 48.7854  8.0325   1
   7  13  -2 221.240  19.644   3
   7  13  -2 230.048  18.463   2
  -7 -13   2 217.719  18.544   1
   6  13  -2 48.2954  6.6343   2
   6  13  -2 54.2002  7.7375   3
  -6 -13   2 66.7140  7.9998   1
  -6 -13   2 47.1166 14.1021   5
   5  13  -2 92.8270  8.9523   1
   5  13  -2 70.0478  7.7983   2
  -5 -13   2 69.8054 14.6167   5
   4  13  -2 308.896  28.332   4
   4  13  -2 340.011  24.852   1
  -4 -13   2 351.939  25.430   1
  -4 -13   2 289.024  26.904   5
   3  13  -2 11.6840  5.6953   2
   3  13  -2 21.9117  5.4555   1
  -3 -13   2 10.3693  4.5286   1
  -3 -13   2 -0.5960  9.3737   5
   2  13  -2 579.802  46.311   4
   2  13  -2 464.190  37.196   1
   2  13  -2 521.282  38.676   2
  -2 -13   2 489.292  37.744   1
   1  13  -2 18.0382  4.7123   1
   1  13  -2 4.89640 9.35619   2
  -1 -13   2 13.1403  5.8975   1
  -1 -13   2 31.3874 13.8990   5
   0  13  -2 392.740  33.032   4
   0 -13   2 316.882  27.568   1
   0 -13   2 389.806  30.090   5
  -1  13  -2 108.763  13.409   4
  -1  13  -2 78.8076  7.7715   2
   1 -13   2 114.986  87.356   5
  -2  13  -2 1939.32  135.43   1
  -2  13  -2 1916.84  154.35   4
   2 -13   2 2008.64  135.90   1
  -3  13  -2 11.2872 16.1004   4
  -3  13  -2 11.2949 11.7321   1
   3 -13   2 -0.3046  5.8540   1
   3 -13   2 -11.252  11.107   5
  -4  13  -2 406.829  31.145   1
  -4  13  -2 488.281  38.685   4
   4 -13   2 433.626  31.960   1
   4 -13   2 367.147  33.877   5
  -5  13  -2 107.891  10.611   1
  -5  13  -2 109.579  20.488   4
   5 -13   2 102.743  25.682   5
   5 -13   2 89.3848 13.4794   1
  -6  13  -2 0.36578 6.53234   1
  -6  13  -2 -4.1698  4.7664   4
   6 -13   2 -6.1455 18.2457   1
   6 -13   2 -10.699  10.427   5
  -7  13  -2 61.2635 37.0699   4
  -7  13  -2 68.8325 14.2761   1
   7 -13   2 61.1654  8.9690   1
  -8  13  -2 276.614  30.078   1
   8 -13   2 333.583  24.783   1
  -9  13  -2 169.019  14.286   1
   9 -13   2 158.109  15.331   1
 -10  13  -2 111.713  10.771   1
  10 -13   2 123.662  12.130   1
 -11  13  -2 76.8761  9.7880   4
 -11  13  -2 78.5729  8.0915   1
  11 -13   2 61.9061  8.5993   1
 -12  13  -2 76.5926 10.5090   4
 -12  13  -2 65.8985  7.4004   1
  12 -13   2 72.1281 10.0757   1
 -13  13  -2 7.90271 3.94354   1
 -13  13  -2 2.78432 6.30261   4
  13 -13   2 7.06946 5.57617   1
 -14  13  -2  2.7079 10.5482   4
  14 -13   2 1.06125 5.48714   1
  15 -13   2 67.0099  8.9167   1
  16 -13   2 29.9792  5.7977   1
  17 -13   2 48.1608  6.6835   1
  18 -13   2 53.8834  6.7720   1
 -21  13  -2 5.40548 8.64947   4
  16  12  -2 -4.6593  5.5161   2
  16  12  -2 3.45651 5.19379   3
  15  12  -2 39.7424  7.4135   3
 -15 -12   2 55.8592 10.9174   5
  14  12  -2 2.86253 5.42255   3
  14  12  -2 -1.5544  3.4166   1
  14  12  -2 -3.7821  5.7384   2
  13  12  -2 -3.0617  5.2677   2
  13  12  -2 2.84614 4.88056   3
 -13 -12   2 -6.4811  8.8063   5
  12  12  -2 10.2575  5.1478   3
 -12 -12   2 13.5478  8.2726   5
  11  12  -2 4.87358 5.49844   3
  11  12  -2 -2.3037  3.9825   1
 -11 -12   2 -0.3197  6.2731   5
  10  12  -2 161.053  16.601   3
  10  12  -2 189.845  15.186   1
  10  12  -2 191.770  16.487   2
   9  12  -2 25.0735  5.4410   1
   9  12  -2 21.9703  5.5437   2
   8  12  -2 210.930  17.860   2
   7  12  -2 -1.5132  4.8724   3
   7  12  -2 -6.6906  4.6859   1
  -7 -12   2 -9.3353 21.0772   5
   6  12  -2 7.54708 5.01703   1
   6  12  -2 7.68271 4.30663   2
  -6 -12   2  2.6200 16.4159   5
   5  12  -2 5.15666 4.14960   2
   5  12  -2 9.73444 3.72935   1
  -5 -12   2 12.0340  5.9447   5
   4  12  -2 433.732  31.962   1
   4  12  -2 402.751  35.693   4
  -4 -12   2 462.615  32.585   1
   3  12  -2 421.938  36.001   2
   3  12  -2 515.295  41.367   4
   3  12  -2 516.548  36.029   1
   2  12  -2 50.6060  8.2777   1
   2  12  -2 65.6800  8.8160   2
  -2 -12   2 87.6426 26.3112   5
   1  12  -2 195.071  15.348   1
   1  12  -2 185.908  15.104   2
   0  12  -2 1233.72   95.51   4
   0 -12   2 1160.34   84.00   1
  -1  12  -2 15.3957 10.0438   2
  -1  12  -2  1.2973 12.3558   4
   1 -12   2 31.7153 25.0102   5
   1 -12   2 10.7632  6.4713   1
  -2  12  -2 240.243  22.532   1
  -2  12  -2 257.427  24.805   4
   2 -12   2 243.437  23.433   1
   2 -12   2 194.922  32.103   5
  -3  12  -2 102.338  12.390   1
  -3  12  -2 123.688  17.004   4
   3 -12   2 149.724  15.768   1
   3 -12   2 156.455  23.375   5
  -4  12  -2 863.179  65.838   4
  -4  12  -2 801.893  57.630   1
   4 -12   2 818.870  58.201   1
   4 -12   2 774.090  63.022   5
  -5  12  -2 40.5568 13.8636   4
   5 -12   2 35.0655 13.7863   5
   5 -12   2 37.8004 10.0432   1
  -6  12  -2 297.273  25.684   1
   6 -12   2 419.859 142.545   5
   6 -12   2 336.033  24.706   1
  -7  12  -2  3.5467 39.3658   4
  -7  12  -2 20.8266 11.2303   1
   7 -12   2  5.4855 19.1777   1
  -8  12  -2 688.456  46.379   1
   8 -12   2 597.318  47.448   1
  -9  12  -2 97.6433  9.4504   1
  -9  12  -2 67.7597 18.8987   4
   9 -12   2 94.9786 20.9420   1
 -10  12  -2 538.732  39.041   1
  10 -12   2 541.031  39.546   1
 -11  12  -2 22.3690  7.8824   1
 -11  12  -2 23.2730 12.5203   4
  11 -12   2 19.3322  5.8608   1
 -12  12  -2 13.7228 20.9748   1
 -12  12  -2  4.3144 13.2034   4
  12 -12   2 11.7250  8.4585   1
 -13  12  -2 191.176  19.680   4
 -13  12  -2 187.775  15.214   1
  13 -12   2 177.793  15.583   1
 -14  12  -2 27.8806 13.8975   4
  14 -12   2 19.4893  6.1623   1
  15 -12   2 29.8418  5.3489   1
  16 -12   2 223.155  17.951   1
  17 -12   2 48.0777  6.2742   1
  18 -12   2 33.4021  5.2360   1
 -19  12  -2 -4.1657  8.9013   4
 -20  12  -2 -6.1143  6.3053   4
 -21  12  -2 -4.8944  8.9278   4
 -17 -11   2 8.41858 7.22155   5
  16  11  -2 0.35882 9.15165   3
 -16 -11   2 26.9041 15.6153   5
  15  11  -2 -5.5385  5.3627   3
  15  11  -2 -2.3067  5.9969   2
 -15 -11   2 -4.1931  7.9381   5
  14  11  -2 50.8248  6.8361   1
  14  11  -2 44.5909  7.3128   3
  13  11  -2 24.4899  5.9275   3
  13  11  -2 15.9458  4.0908   1
  13  11  -2 25.8374  5.5079   2
 -13 -11   2 12.5484  6.2375   5
  12  11  -2 47.7465  6.4965   1
  12  11  -2 69.8016  8.7423   2
  12  11  -2 61.6204  8.3402   3
 -12 -11   2 61.1956 12.9040   5
  11  11  -2 68.5747  7.6990   1
  11  11  -2 86.1124  9.4965   2
  11  11  -2 64.4892  8.9812   3
 -11 -11   2 65.1897 21.3824   5
  10  11  -2 39.8535  6.8225   3
  10  11  -2 37.0262  6.5638   2
  10  11  -2 51.1754  6.0572   1
 -10 -11   2 15.9106 15.3983   5
   9  11  -2 235.361  18.066   2
   9  11  -2 179.815  16.452   1
   9  11  -2 209.627  18.343   3
  -9 -11   2 167.476  33.988   5
  -9 -11   2 214.250  16.893   1
   8  11  -2 97.1036  9.6145   1
   8  11  -2 100.855  11.344   3
   8  11  -2 91.8815  9.9666   2
  -8 -11   2 113.798  10.196   1
  -8 -11   2 94.7747 30.9619   5
   7  11  -2 14.6215  4.8089   3
   7  11  -2 2.92435 4.90424   2
   7  11  -2 8.34110 6.23544   1
  -7 -11   2 4.60269 9.10513   5
  -7 -11   2 9.67602 4.72634   1
   6  11  -2 385.914  30.748   1
   6  11  -2 409.243  32.153   2
  -6 -11   2 481.489  31.579   1
  -6 -11   2 402.825  33.914   5
   5  11  -2 6.34011 5.61581   3
   5  11  -2  8.5168 16.0926   1
   5  11  -2 7.70236 7.46728   2
  -5 -11   2 -0.0539  3.3805   4
  -5 -11   2 -20.505  20.685   5
  -5 -11   2 -4.2270  3.4334   1
   4  11  -2 186.412  16.025   4
   4  11  -2 182.772  19.187   1
  -4 -11   2 190.441  21.247   1
  -4 -11   2 152.599  27.398   5
   3  11  -2 231.689  48.156   2
   3  11  -2 371.900  30.366   1
  -3 -11   2 324.418  35.513   5
  -3 -11   2 263.646  37.809   4
  -3 -11   2 250.486  36.426   1
   2  11  -2 553.981  50.670   2
   2  11  -2 499.241  40.455   1
   2  11  -2 649.302  47.745   4
   1  11  -2 -0.1958  4.5116   1
  -1 -11   2 -8.6742 54.2855   5
  -1 -11   2 -3.9900  6.7719   1
   0  11  -2 1276.91   80.28   1
   0  11  -2 1054.60  114.41   2
   0  11  -2 1061.26  102.41   4
  -1  11  -2 234.465  23.402   4
   1 -11   2 238.150  21.019   5
   1 -11   2 246.691  20.147   1
  -2  11  -2 3.33981 7.71602   4
  -2  11  -2 4.95205 9.06838   1
   2 -11   2 1.23220 8.59870   1
   2 -11   2 -12.881   9.895   5
  -3  11  -2 144.375  16.574   1
  -3  11  -2 129.162  25.577   4
   3 -11   2 112.098  15.542   5
   3 -11   2 137.328  24.406   1
  -4  11  -2 15.2536  5.8708   4
  -4  11  -2  7.5654 10.9720   1
   4 -11   2 -0.0434 12.7081   5
   4 -11   2 19.4512  8.0583   1
  -5  11  -2 22.9449 20.8578   4
  -5  11  -2 19.9730  8.5777   1
   5 -11   2 -3.6702  6.7234   5
   5 -11   2  6.6589 28.9597   1
  -6  11  -2 599.277  42.871   1
  -6  11  -2 592.111  48.603   4
   6 -11   2 603.131  48.053   1
   6 -11   2 573.741  45.689   5
  -7  11  -2 161.929  21.781   4
  -7  11  -2 168.029  15.162   1
   7 -11   2 162.739  14.685   1
  -8  11  -2  2.1745 42.0662   1
  -8  11  -2 -0.7076  9.5223   4
   8 -11   2  9.8687 19.2144   1
  -9  11  -2 3.88994 9.49054   1
  -9  11  -2 5.90821 9.91775   4
   9 -11   2 12.8578 10.7931   1
 -10  11  -2 32.2817  5.1594   1
 -10  11  -2 30.4783 12.1416   4
  10 -11   2 22.0085  9.8334   1
 -11  11  -2 1.24975 9.24080   1
 -11  11  -2 -16.095  14.841   4
 -12  11  -2 21.9154  7.6126   4
  12 -11   2 27.4038  5.3728   1
 -13  11  -2 19.2659  9.6700   4
 -13  11  -2 10.7896  3.6498   1
  13 -11   2 14.2603 12.9446   1
 -14  11  -2 191.675  18.857   4
  14 -11   2 169.798  14.689   1
  15 -11   2 249.222  19.426   1
 -16  11  -2  2.2343 11.2056   4
  16 -11   2 1.73959 3.79116   1
 -17  11  -2 2.02268 5.70974   4
  17 -11   2 4.24943 3.48036   1
 -18  11  -2 -1.1166 15.9217   4
  18 -11   2 -2.3686  3.0508   1
 -21  11  -2 -0.9693  9.6494   4
 -22  11  -2 -8.1023  8.1071   4
  17  10  -2 -6.0968  5.3935   3
  17  10  -2 -0.1717  6.8854   2
 -17 -10   2 -8.2330  8.6553   5
  16  10  -2 0.27834 4.74000   3
  16  10  -2 18.5857  6.4814   2
 -16 -10   2 8.24881 5.89027   5
  15  10  -2 9.56892 5.34984   2
 -15 -10   2 9.43146 7.89995   5
  14  10  -2 48.4400  8.6966   3
  14  10  -2 48.1060  7.4577   1
 -14 -10   2 63.1654  9.5636   5
  13  10  -2 -5.2849  3.1931   1
  13  10  -2 -7.3602  5.6318   2
  13  10  -2 -3.5471  4.9913   3
 -13 -10   2 -10.158  12.353   5
  12  10  -2 74.5545  8.0803   1
  12  10  -2 99.3691  9.7600   3
 -12 -10   2 90.7593 18.0180   5
  11  10  -2 18.8408  4.5665   3
  11  10  -2 19.4051  4.2254   1
  11  10  -2 11.9260  4.4512   2
  10  10  -2 439.146  34.387   1
  10  10  -2 515.687  38.557   3
   9  10  -2 237.973  17.671   1
   9  10  -2 221.136  18.790   2
   9  10  -2 214.320  19.223   3
  -9 -10   2 214.847  17.457   1
   8  10  -2 1324.74   90.83   1
   8  10  -2 1347.83   95.59   2
   8  10  -2 1304.30  100.96   3
  -8 -10   2 1147.17  144.64   1
   7  10  -2 33.4792  8.6378   2
   7  10  -2 46.1571 10.2517   1
  -7 -10   2 36.8402  9.3434   5
  -7 -10   2 22.8258  6.2422   4
  -7 -10   2 26.0174  9.5653   1
   6  10  -2 556.902  47.038   2
  -6 -10   2 532.756 192.008   4
  -6 -10   2 615.703  50.211   1
   5  10  -2 72.0236  8.0345   2
   5  10  -2 107.299  12.073   1
  -5 -10   2 86.6831  8.8710   1
  -5 -10   2 82.8775  9.6320   5
   4  10  -2 358.067  29.011   4
   4  10  -2 321.768  27.023   2
   4  10  -2 376.440  26.449   1
  -4 -10   2 397.999  26.852   1
  -4 -10   2 324.628  28.880   5
   3  10  -2 101.012  10.803   2
  -3 -10   2 104.462  37.792   5
  -3 -10   2 92.9620  9.4168   1
   2  10  -2 68.6105 10.0885   2
   2  10  -2 73.5975 14.7850   4
   2  10  -2 84.0864 14.2359   1
  -2 -10   2 55.1178  6.2325   4
  -2 -10   2 94.0889 21.5840   5
   1  10  -2 4.01998 5.98599   2
  -1 -10   2 1.37035 3.00460   4
  -1 -10   2 -3.3223  4.6307   5
   0  10  -2 324.062  24.311   1
   0 -10   2 349.250  24.792   1
   0 -10   2 312.156  26.289   5
  -1  10  -2 140.443  58.047   4
  -1  10  -2 99.5597 16.8191   1
   1 -10   2 82.5594 14.0233   1
   1 -10   2 80.4976 25.7225   5
  -2  10  -2 206.032  19.910   4
  -2  10  -2 245.960  21.681   1
   2 -10   2 253.143  23.477   1
   2 -10   2 243.059  21.070   5
  -3  10  -2 172.482  18.094   1
   3 -10   2 171.820  18.211   5
  -4  10  -2 1707.91  123.45   1
  -4  10  -2 1931.48  141.22   4
   4 -10   2 1724.47  162.73   5
   4 -10   2 1774.58  123.82   1
  -5  10  -2 54.5206 18.9985   1
  -5  10  -2 69.2447 33.8741   4
   5 -10   2 68.0012 24.1774   1
   5 -10   2 66.9937 18.0731   5
  -6  10  -2 696.059  56.416   4
  -6  10  -2 625.178  45.277   1
   6 -10   2 601.086  46.881   1
   6 -10   2 638.526  48.811   5
  -7  10  -2 65.9192 14.9941   4
  -7  10  -2 51.4052 20.2513   1
   7 -10   2 73.5798 23.2696   1
  -8  10  -2 46.9332 14.0379   4
  -8  10  -2 50.5431  7.9918   1
   8 -10   2 43.5046 14.1324   1
  -9  10  -2 -3.4262  6.5624   4
  -9  10  -2 7.55862 3.55109   1
   9 -10   2 -2.4493  4.7293   1
 -10  10  -2  3.8003 12.4675   4
 -11  10  -2 3.91547 6.18961   1
 -11  10  -2 12.3915 19.9551   4
  11 -10   2 10.3385  4.3139   1
 -12  10  -2 698.587  55.420   4
 -12  10  -2 608.461  47.190   1
  12 -10   2 699.095  47.800   1
 -13  10  -2 11.1930 22.9391   4
 -13  10  -2 -2.5509  3.7078   1
  13 -10   2 4.13357 6.23972   1
 -14  10  -2 39.3335 15.4267   4
  14 -10   2 52.1492  6.2186   1
 -15  10  -2 4.67052 7.09518   4
  16 -10   2 273.994  20.687   1
  17 -10   2 97.9288  8.7238   1
  18 -10   2 137.333  11.126   1
 -20  10  -2 -0.9964 11.9277   4
  18   9  -2 -1.3109  5.3797   2
  18   9  -2 -9.2368  5.9217   3
 -18  -9   2 0.81756 7.36734   5
  17   9  -2 20.6145  5.7623   3
  16   9  -2 12.0095  6.8113   2
 -16  -9   2 17.4477  8.2550   5
  15   9  -2 50.9867  8.5686   2
  15   9  -2 35.8268  7.0218   3
  14   9  -2 110.391  12.271   3
 -14  -9   2 139.305  16.557   5
  13   9  -2 -7.8669  4.9041   3
  13   9  -2 4.24974 5.54912   2
 -13  -9   2 -1.6746  7.1610   5
  12   9  -2 40.7119  6.7465   2
  12   9  -2 41.9059  6.5671   3
  12   9  -2 37.1593  4.9329   1
  11   9  -2 9.57802 5.71787   2
 -11  -9   2 5.16330 6.97545   5
  10   9  -2 -2.0277  7.0112   2
  10   9  -2 -1.6264  6.3752   1
 -10  -9   2  0.7071 29.5194   5
 -10  -9   2  1.3046 38.6909   1
   9   9  -2 215.215  18.484   1
   9   9  -2 213.266  17.624   2
   9   9  -2 183.529  18.846   3
  -9  -9   2 169.811  24.161   5
  -9  -9   2 201.966  16.652   1
   8   9  -2 1430.53  106.01   2
   8   9  -2 1211.03  118.77   1
  -8  -9   2 1477.66  151.18   1
   7   9  -2 0.82793 8.44394   1
   7   9  -2 -6.5037 13.4759   3
   7   9  -2 -10.439  12.709   2
  -7  -9   2 3.53579 8.95033   1
   6   9  -2 921.937  67.378   2
   6   9  -2 918.452  70.583   3
   6   9  -2 906.747  64.093   1
  -6  -9   2 913.333  64.243   1
   5   9  -2 29.9083  5.4623   2
  -5  -9   2 15.0710 32.4052   5
  -5  -9   2 22.6442  9.6717   4
  -5  -9   2 35.4573  9.1905   1
   4   9  -2 1949.41  145.88   4
   4   9  -2 1536.83  134.40   2
   4   9  -2 1800.85  124.53   1
  -4  -9   2 1926.98  124.87   1
   3   9  -2 259.418  22.544   2
   3   9  -2 316.650  24.655   4
  -3  -9   2 310.780  26.767   5
  -3  -9   2 297.218  25.358   1
   2   9  -2 67.8573 42.4185   4
   2   9  -2 78.9791  9.7219   1
   2   9  -2 71.4346  6.6459   2
  -2  -9   2 61.6683  6.5977   4
  -2  -9   2 86.0927 12.6377   1
  -2  -9   2 78.3102 11.9982   5
   1   9  -2 402.935  33.271   4
   1   9  -2 338.735  27.892   2
  -1  -9   2 326.347  45.336   4
  -1  -9   2 448.703  29.872   5
  -1  -9   2 334.874  27.161   1
   0   9  -2 25.2534  8.1494   2
   0   9  -2 26.1705  5.9689   4
   0   9  -2 17.8171  6.6516   1
   0  -9   2 26.9454  3.5618   4
   0  -9   2 35.1838  9.5589   5
   0  -9   2 18.4621  6.8726   1
  -1   9  -2 87.8184 16.6210   4
  -1   9  -2 90.3858 14.4601   1
   1  -9   2 100.257  17.881   5
   1  -9   2 84.7543 12.2628   1
   1  -9   2 99.1359 10.5769   4
  -2   9  -2 940.296  68.504   4
  -2   9  -2 847.345  60.134   1
   2  -9   2 840.924  60.361   1
   2  -9   2 808.188  67.297   5
   3  -9   2  7.6994 10.0885   5
   3  -9   2 13.1615 19.0909   1
  -4   9  -2 574.860  36.687   1
  -4   9  -2 454.604  41.347   4
   4  -9   2 445.928  36.308   1
   4  -9   2 568.409  39.139   5
  -5   9  -2 141.265  25.241   4
   5  -9   2 155.541  13.115   5
  -6   9  -2 645.852  46.252   1
   6  -9   2 612.368  46.493   1
   6  -9   2 716.140  52.017   5
  -7   9  -2 -8.4794 10.7829   1
   7  -9   2 -5.8359 14.2160   1
  -8   9  -2 -2.3208  2.7949   1
  -8   9  -2  5.2480 14.2205   4
   8  -9   2 -2.3216  5.6005   1
  -9   9  -2 424.470  29.611   1
  -9   9  -2 386.086  34.270   4
   9  -9   2 414.479  31.503   1
 -10   9  -2 169.037  13.081   1
 -10   9  -2 166.859  28.928   4
  10  -9   2 156.290  13.421   1
 -11   9  -2 105.384  18.807   4
 -11   9  -2 136.141  10.547   1
  11  -9   2 138.456  12.452   1
  11  -9   2 112.590  12.541   1
 -12   9  -2 342.927  29.814   4
 -12   9  -2 319.653  24.648   1
  12  -9   2 351.382  25.116   1
 -13   9  -2 74.2048  8.0073   1
 -13   9  -2 98.2927 21.3398   4
  13  -9   2 69.8122 14.2084   1
 -14   9  -2 63.9011 10.7685   4
  14  -9   2 62.9655  6.6686   1
 -15   9  -2 115.324  12.660   4
  15  -9   2 96.5888  8.9663   1
 -16   9  -2 12.3431  7.6027   4
 -17   9  -2 -8.2954 10.8538   4
 -22   9  -2 -4.8266  7.2738   4
  19   8  -2 7.59546 6.33075   3
 -19  -8   2 -6.5949  7.9478   5
  18   8  -2 2.16852 4.47532   3
 -18  -8   2  7.5652 18.1499   5
  17   8  -2 48.1218  8.8132   2
  17   8  -2 30.1610  7.2976   3
 -17  -8   2 39.1201  8.2979   5
  16   8  -2 51.4760  8.3570   3
  15   8  -2 1.80969 6.11028   2
 -15  -8   2 -10.527   7.426   5
  14   8  -2 43.1885  6.9489   3
  14   8  -2 32.2879  6.9767   2
 -14  -8   2 28.5140  6.7108   5
  13   8  -2 6.85204 3.60486   1
  12   8  -2 -2.6534  4.5621   3
  12   8  -2 0.72266 4.90384   1
  12   8  -2 0.65405 5.05210   2
 -12  -8   2 -6.7802  6.1217   5
  11   8  -2 31.4390  7.4438   1
  11   8  -2 31.6198  5.2291   3
  11   8  -2 29.5403  8.9868   2
  10   8  -2 901.141  66.511   1
  10   8  -2 1005.24   74.12   3
  10   8  -2 982.722  71.164   2
 -10  -8   2 881.607 125.885   1
   9   8  -2 12.6217  8.5028   3
   9   8  -2 18.4906  5.5669   2
   9   8  -2 23.8442  5.7043   1
  -9  -8   2  9.6327 16.5893   5
  -9  -8   2 17.6501  4.2302   1
   8   8  -2 107.613   9.574   2
   8   8  -2 78.8430  8.2449   1
   8   8  -2 100.362  10.405   3
   8   8  -2 91.7836  7.7177   1
  -8  -8   2 74.1935 12.2690   5
  -8  -8   2 85.3497  8.5537   1
   7   8  -2 4.42132 2.17901   1
   7   8  -2 -11.622   7.667   2
   7   8  -2 -2.4689  7.0534   1
   7   8  -2 -2.2777  6.9021   3
  -7  -8   2  0.8844 13.9085   5
  -7  -8   2 -2.3228  2.6937   1
  -7  -8   2 9.85989 7.30856   4
   6   8  -2 772.588  51.044   1
   6   8  -2 617.934  53.631   2
   6   8  -2 689.516  51.060   1
   6   8  -2 844.208  56.529   3
  -6  -8   2 709.785  55.282   5
  -6  -8   2 732.384  51.250   1
   5   8  -2 359.828  26.654   1
   5   8  -2 389.954  27.157   1
   5   8  -2 364.437  28.142   2
   5   8  -2 385.552  29.311   3
  -5  -8   2 339.192  29.433   5
  -5  -8   2 375.134  27.048   1
   4   8  -2 752.679  52.254   1
   4   8  -2 779.481  58.650   4
  -4  -8   2 766.300  52.411   1
  -4  -8   2 668.800  59.408   5
   3   8  -2 1214.89  113.96   2
   3   8  -2 1538.87  122.97   4
   3   8  -2 1364.85   97.42   1
  -3  -8   2 1534.43   97.79   1
  -3  -8   2 1382.17  105.56   5
   2   8  -2 418.236  30.916   2
   2   8  -2 370.877  45.454   4
  -2  -8   2 396.412  28.442   1
  -2  -8   2 332.376  63.013   4
   1   8  -2 161.641  20.775   1
   1   8  -2 140.727  13.121   2
  -1  -8   2 186.584  16.502   1
  -1  -8   2 176.090  23.343   5
   0   8  -2 210.413  60.872   4
   0   8  -2 203.199  18.878   1
   0  -8   2 197.545  16.880   5
   0  -8   2 159.115  15.605   4
   0  -8   2 199.962  14.917   1
  -1   8  -2 482.713  52.769   4
  -1   8  -2 489.654  35.243   1
   1  -8   2 532.695  35.554   1
   1  -8   2 493.731  43.605   4
   1  -8   2 472.611  37.569   5
  -2   8  -2 910.541  83.263   4
  -2   8  -2 919.318  65.669   1
   2  -8   2 957.936  65.952   1
   2  -8   2 987.695  70.359   5
  -3   8  -2 17.3778  3.2826   1
   3  -8   2 20.4077 13.4964   1
   3  -8   2 26.4197  4.8131   5
  -4   8  -2 1063.41   76.56   1
   4  -8   2 1139.02   84.01   5
   4  -8   2 1114.44   77.72   1
  -5   8  -2 223.794  18.837   1
  -5   8  -2 259.874  19.270   5
   5  -8   2 259.536  19.770   5
  -6   8  -2 40.7140 19.7126   4
  -6   8  -2 35.9026  6.8870   5
   6  -8   2 27.5946  7.1692   1
  -7   8  -2  4.4787 15.9302   4
  -7   8  -2 4.85125 2.08329   5
   7  -8   2 3.78129 3.63793   1
  -8   8  -2 185.164  14.454   1
  -8   8  -2 193.897  17.353   4
  -8   8  -2 198.199  15.016   5
   8  -8   2 181.607  14.721   1
  -9   8  -2 313.938  27.327   4
  -9   8  -2 240.192  20.626   1
  -9   8  -2 293.135  21.832   5
   9  -8   2 300.655  22.609   1
   9  -8   2 279.947  21.017   1
 -10   8  -2 739.792  68.240   5
 -10   8  -2 758.861  60.818   4
 -10   8  -2 720.163  50.533   1
  10  -8   2 682.524  50.556   1
  10  -8   2 710.647  50.714   1
 -11   8  -2 216.078  17.340   5
 -11   8  -2 215.627  16.682   1
  11  -8   2 233.399  17.293   1
 -12   8  -2 254.740  19.916   1
 -12   8  -2 294.051  21.206   5
  12  -8   2 261.494  21.905   1
 -13   8  -2 292.255  20.400   1
 -13   8  -2 241.208  26.767   4
  13  -8   2 287.170  22.863   1
 -14   8  -2 167.925  17.080   4
  14  -8   2 162.458  12.849   1
 -15   8  -2 105.227  12.913   4
  15  -8   2 85.2608  7.8597   1
 -16   8  -2 79.3474 10.8722   4
  16  -8   2 56.8275  5.8127   1
  17  -8   2 43.9278  7.3104   1
 -18   8  -2 8.83663 8.64114   4
 -22   8  -2 75.6411 11.9610   4
  20   7  -2 61.1724  9.8020   3
  19   7  -2 2.21823 4.93052   3
 -19  -7   2 5.05474 6.85794   5
  18   7  -2 35.4810  7.9099   3
 -18  -7   2 41.5462  9.1089   5
  17   7  -2 29.4703  7.1482   3
  17   7  -2 32.4783  8.0758   2
 -17  -7   2 25.1633  8.1472   5
  16   7  -2 145.440  14.720   3
 -16  -7   2 158.787  19.732   5
  15   7  -2 1.89841 6.18751   2
  15   7  -2 0.84643 5.15529   3
 -15  -7   2 -0.2846  5.2927   5
  14   7  -2 124.186  12.014   3
  14   7  -2 95.8393  8.7684   1
  14   7  -2 131.199  12.156   2
 -14  -7   2 116.582  14.410   5
  13   7  -2 21.7540  4.0762   1
  13   7  -2 26.1408  5.7525   3
  12   7  -2 58.3834  7.0746   1
  12   7  -2 71.6833  7.5689   3
 -12  -7   2 57.3659 15.5614   5
  11   7  -2  8.9969 13.4829   2
  11   7  -2 10.9480  5.9186   1
  11   7  -2 8.43139 9.10482   3
 -11  -7   2 2.17542 5.16513   5
  10   7  -2 441.245  30.842   2
  10   7  -2 382.573  31.310   3
  10   7  -2 300.160  42.226   1
 -10  -7   2 387.428  74.501   1
 -10  -7   2 377.271  54.869   5
   9   7  -2 182.127  17.048   1
   9   7  -2 219.517  17.168   2
   9   7  -2 200.097  18.340   3
   9   7  -2 210.869  15.096   1
  -9  -7   2 187.917  25.149   5
  -9  -7   2 198.325  15.335   1
   8   7  -2 391.862  30.190   1
   8   7  -2 435.362  33.621   3
   8   7  -2 445.019  30.151   1
   8   7  -2 460.015  32.631   2
  -8  -7   2 399.152  30.216   1
  -8  -7   2 405.984  33.593   5
   7   7  -2 15.3099  9.7797   1
   7   7  -2 25.9113  3.3234   1
   7   7  -2 19.5268  7.5259   3
   7   7  -2 24.3744  6.9195   2
  -7  -7   2 17.9873  5.6792   1
  -7  -7   2 18.3174 16.3453   5
  -7  -7   2 18.5213  9.0356   4
   6   7  -2 19.4791  5.6040   2
   6   7  -2 21.6537  6.8684   1
   6   7  -2 22.8879  4.0008   3
  -6  -7   2 23.5591  4.7880   5
  -6  -7   2 16.1647  3.0783   1
   5   7  -2 963.033  69.504   1
   5   7  -2 1008.59   73.23   2
   5   7  -2 961.944  69.396   1
   5   7  -2 1105.10   76.77   3
  -5  -7   2 1056.83   70.24   1
  -5  -7   2 644.031 213.422   4
  -5  -7   2 972.931  75.006   5
   4   7  -2 7.55683 7.40147   1
   4   7  -2 9.42325 2.51474   1
   4   7  -2 11.6538  8.7391   3
  -4  -7   2 4.20077 9.30714   5
  -4  -7   2 17.1357  5.6542   1
   3   7  -2 438.725  31.847   1
   3   7  -2 427.278  31.909   1
  -3  -7   2 414.909 119.522   5
  -3  -7   2 486.408  32.541   1
   2   7  -2 5548.92  382.03   1
  -2  -7   2 5641.00  384.32   1
   1   7  -2 145.426  46.069   4
   1   7  -2 112.232  10.155   1
  -1  -7   2 145.018  10.555   1
  -1  -7   2 147.317  31.580   4
   0   7  -2 1940.37  137.70   1
   0  -7   2 2069.74  137.92   1
   0  -7   2 2007.33  147.40   5
  -1   7  -2 68.9029 16.1658   1
  -1   7  -2 58.3334 25.0487   4
   1  -7   2 50.0324 17.9155   5
   1  -7   2 59.2468  6.1641   4
   1  -7   2 61.4541  8.6785   1
  -2   7  -2 4582.37  317.24   1
   2  -7   2 4671.61  317.87   1
   2  -7   2 4680.79  349.21   5
  -3   7  -2 142.664  17.018   4
   3  -7   2 154.387  20.001   1
   3  -7   2 140.134  12.248   5
  -4   7  -2 4690.38  313.51   5
  -4   7  -2 3835.12  285.90   1
   4  -7   2 4009.01  286.10   1
   4  -7   2 4238.19  356.39   5
  -5   7  -2 5.99576 9.26816   4
  -5   7  -2 11.6769  2.6824   5
  -5   7  -2 10.8142  2.5837   1
   5  -7   2 16.3241  3.2787   1
   5  -7   2 7.49025 2.64052   1
  -6   7  -2 899.230  63.100   5
  -6   7  -2 896.069  66.230   4
   6  -7   2 759.810  56.365   1
   6  -7   2 695.339  56.308   1
  -7   7  -2 1.16663 2.91572   1
  -7   7  -2  5.5172 13.9355   4
   7  -7   2 -5.9073  6.4646   1
  -8   7  -2 595.225  40.432   1
   8  -7   2 554.272  40.509   1
  -9   7  -2 313.734  21.841   1
  -9   7  -2 311.306  25.942   4
   9  -7   2 263.864  21.778   1
   9  -7   2 315.470  21.949   1
 -10   7  -2 197.489  23.382   4
 -10   7  -2 156.714  12.511   1
  10  -7   2 152.432  12.620   1
  10  -7   2 173.113  13.516   1
 -11   7  -2 35.1054  5.7558   1
 -11   7  -2 34.7598 25.6643   4
 -11   7  -2 53.8794  5.2932   5
  11  -7   2 40.3458  8.0389   1
 -12   7  -2 2294.73  172.97   4
 -12   7  -2 2286.30  150.05   1
  12  -7   2 2151.23  150.06   1
  12  -7   2 1910.24  192.95   1
 -13   7  -2 176.328  13.767   1
 -13   7  -2 167.750  38.945   4
  13  -7   2 187.335  17.638   1
 -14   7  -2 -2.5190  6.8543   4
 -15   7  -2 4.23449 7.41175   4
  15  -7   2 1.18841 2.07223   1
  16  -7   2 12.6947  2.3494   1
  17  -7   2 23.2352  3.7068   1
 -19   7  -2 -6.8123  7.0438   4
 -20   7  -2 -1.9279 10.4320   4
 -23   7  -2 2.48571 7.02396   4
  20   6  -2 -8.8072  4.7828   3
  19   6  -2 2.74698 6.05702   3
 -19  -6   2 -9.4353  8.2842   5
  18   6  -2 60.9620  9.3797   3
 -18  -6   2 72.0401 12.5837   5
  17   6  -2 18.8782  6.4308   3
  17   6  -2 6.90655 7.26701   2
  16   6  -2 17.0822 10.3296   3
  16   6  -2  9.0058 13.1527   2
 -16  -6   2   3.387 139.299   5
  15   6  -2 132.874  12.771   2
  15   6  -2 114.884  12.469   3
 -15  -6   2 110.551  17.272   5
  14   6  -2 117.168  12.055   2
  14   6  -2 112.068  11.727   3
  13   6  -2 -0.9694  5.3002   2
  13   6  -2 -3.6469  5.6902   3
  13   6  -2 1.62869 1.71387   1
 -13  -6   2 -11.549   6.419   5
  12   6  -2 65.5207 22.8922   1
  12   6  -2 102.892  10.218   3
 -12  -6   2 86.7295 11.0644   5
  11   6  -2 438.768  34.880   3
  11   6  -2 332.099  28.271   1
  11   6  -2 397.912  30.479   2
 -11  -6   2 309.309  35.774   1
 -11  -6   2 436.024  31.758   5
  10   6  -2 -11.452   7.318   2
  10   6  -2 -2.0517  5.2672   3
  10   6  -2 -1.7581  1.5895   1
  10   6  -2 1.14936 2.25675   1
 -10  -6   2 4.18916 7.79398   1
 -10  -6   2  9.5349 13.0049   5
   9   6  -2 21.8183  3.6195   1
   9   6  -2 21.5134  5.1477   2
   9   6  -2 30.4659  7.5399   1
   9   6  -2 18.4718  8.7950   3
  -9  -6   2 27.5453 13.3203   5
  -9  -6   2 16.1834  5.5273   1
   8   6  -2 21.5934  5.6953   3
   8   6  -2 20.4926  2.6450   1
   8   6  -2 22.1880  7.6862   2
   8   6  -2 18.8779  4.6992   1
  -8  -6   2 19.3645  3.2243   1
  -8  -6   2 18.0685  3.8211   4
  -8  -6   2 10.8702  9.0643   5
   7   6  -2 587.052  42.756   1
   7   6  -2 627.906  47.558   3
   7   6  -2 660.943  45.829   2
   7   6  -2 630.829  42.770   1
  -7  -6   2 599.373  50.763   5
  -7  -6   2 563.027  60.849   4
  -7  -6   2 596.879  42.835   1
   6   6  -2 2248.42  159.83   1
   6   6  -2 2496.10  167.97   2
   6   6  -2 2413.87  176.19   3
   6   6  -2 2297.47  159.31   1
  -6  -6   2 2360.75  181.28   5
  -6  -6   2 1884.10  297.64   4
  -6  -6   2 2312.87  162.33   1
   5   6  -2 846.190  60.819   1
   5   6  -2 990.713  67.353   3
   5   6  -2 780.182  64.204   2
   5   6  -2 832.838  60.947   1
  -5  -6   2 959.987  66.296   5
  -5  -6   2 723.482 134.347   4
  -5  -6   2 904.671  61.099   1
   4   6  -2 857.392  62.186   3
   4   6  -2 801.368  55.167   1
   4   6  -2 796.311  55.221   1
  -4  -6   2 731.315  55.194   1
  -4  -6   2 786.324  59.546   5
   3   6  -2 483.393  33.228   1
   3   6  -2 503.868  37.246   4
   3   6  -2 503.505  35.903   2
  -3  -6   2 417.498  33.256   1
  -3  -6   2 449.551  35.972   5
   2   6  -2 315.691  22.000   1
   2   6  -2 291.888  24.809   4
  -2  -6   2 295.526  22.081   1
  -2  -6   2 323.501  23.860   5
   1   6  -2 9.76919 3.09676   2
   1   6  -2 9.61234 5.27861   1
   1   6  -2 17.0941  8.3624   4
   1   6  -2 17.1705  2.3835   1
  -1  -6   2 22.4487 14.0356   5
  -1  -6   2 13.8209  4.3604   4
  -1  -6   2 12.7712  5.0566   1
   0   6  -2 278.083  22.729   1
   0   6  -2 301.633  21.010   1
   0  -6   2 279.827  22.861   5
   0  -6   2 307.115  22.364   1
  -1   6  -2 130.594  10.227   1
  -1   6  -2 107.246  15.179   1
   1  -6   2 127.591  21.764   5
   1  -6   2 152.063  21.118   1
  -2   6  -2 348.139  33.942   1
  -2   6  -2 359.824  40.114   4
  -3   6  -2 11.9820 10.6948   4
  -3   6  -2 15.9123 13.1679   1
  -3   6  -2 29.6989  6.3834   5
   3  -6   2 20.3090  5.4098   5
   3  -6   2 27.6026 10.4484   1
   4  -6   2 3960.08  270.82   1
  -5   6  -2 317.795  23.966   1
  -5   6  -2 383.131  25.391   5
  -5   6  -2 281.378  27.585   4
   5  -6   2 326.760  25.212   1
   5  -6   2 367.780  24.344   1
  -6   6  -2 137.714  10.369   5
  -6   6  -2 137.006  13.573   1
   6  -6   2 110.901  13.804   1
  -7   6  -2 293.136  22.729   1
   7  -6   2 366.446  24.822   1
   7  -6   2 301.372  22.889   1
  -8   6  -2 22.6193  5.7949   1
   8  -6   2 5.34069 5.70975   1
  -9   6  -2 286.223  20.023   1
   9  -6   2 264.341  20.272   1
   9  -6   2 280.662  20.112   1
 -10   6  -2 659.940  45.003   1
  10  -6   2 630.433  45.080   1
  10  -6   2 642.743  45.106   1
 -11   6  -2 0.61455 2.20475   1
  11  -6   2 6.03814 2.29423   1
  11  -6   2 3.69596 7.38512   1
 -12   6  -2 81.4602  6.6186   1
  12  -6   2 77.2099 12.8646   1
  12  -6   2 76.0813  6.7393   1
  12  -6   2 69.5977 13.2486   3
 -13   6  -2 438.277  30.606   1
  13  -6   2 461.664  36.989   3
  13  -6   2 402.922  30.632   1
  14  -6   2 82.2752  7.3669   1
  14  -6   2 104.290  11.084   3
 -15   6  -2 180.603  13.687   5
  15  -6   2 188.447  16.758   3
  15  -6   2 150.220  12.605   1
 -16   6  -2 8.66552 8.21078   4
 -17   6  -2  4.0778 10.3488   4
 -18   6  -2 186.588  20.062   4
 -19   6  -2 83.1466 12.0849   4
 -20   6  -2 7.15800 9.84763   4
 -21   6  -2 -10.127   7.916   4
 -22   6  -2 -9.2452  8.8621   4
  21   5  -2 23.7089  6.8770   3
  20   5  -2 -1.0912  6.1070   3
  19   5  -2 1.92364 6.10368   3
 -19  -5   2 14.2783  7.2592   5
  18   5  -2 33.7255  8.0537   3
  17   5  -2 8.05802 7.15553   2
  16   5  -2 64.8570 10.6703   2
  16   5  -2 70.2878  8.9341   3
 -16  -5   2 70.8174 18.5050   5
  15   5  -2 32.4350  6.4209   3
  14   5  -2 89.4565  9.8233   2
  14   5  -2 81.6544  9.6868   3
 -14  -5   2 76.5687 10.2672   5
  13   5  -2 -0.8261  5.0547   3
  13   5  -2 -12.133   6.146   2
 -13  -5   2 -15.706  10.407   5
  12   5  -2 51.5012  7.5567   3
  12   5  -2 59.9974 14.0301   2
  12   5  -2 29.8907 21.6862   1
 -12  -5   2 54.0825  9.3533   5
  11   5  -2 740.690  59.707   3
  11   5  -2 754.172  57.468   2
 -11  -5   2 803.285  58.530   5
  10   5  -2 30.2787  4.9987   3
  10   5  -2 19.9114  3.2055   1
  10   5  -2 22.2132  6.1362   2
 -10  -5   2 21.1625  3.3197   1
 -10  -5   2 20.3233 13.6418   5
   9   5  -2 175.595  13.452   1
   9   5  -2 185.983  16.805   2
   9   5  -2 184.679  13.763   1
   9   5  -2 214.155  17.733   3
  -9  -5   2 192.100  27.858   5
  -9  -5   2 154.409  13.726   1
   8   5  -2 113.896  12.300   2
   8   5  -2 107.406  10.563   3
   8   5  -2 116.434   8.074   1
   8   5  -2 98.0831  8.6182   1
  -8  -5   2 96.9649 11.1288   5
  -8  -5   2 96.1907 17.2557   4
  -8  -5   2 90.1237  7.9984   1
   7   5  -2 31.1871  6.5818   1
   7   5  -2 35.8892  8.5344   2
   7   5  -2 37.0864  5.0112   1
   7   5  -2 25.4872  6.3603   3
  -7  -5   2 36.0376  7.5392   4
  -7  -5   2 32.7713  5.5901   5
  -7  -5   2 38.1591  4.7266   1
   6   5  -2 49.0478 14.9700   2
   6   5  -2 35.3898  7.4955   1
   6   5  -2 51.9956 10.6266   3
   6   5  -2 50.4118  5.0708   1
  -6  -5   2 50.6841 13.7892   5
  -6  -5   2 54.6876  6.2106   4
  -6  -5   2 45.3930  4.5595   1
   5   5  -2 50.6778  8.6529   1
   5   5  -2 54.7261  7.3421   1
   5   5  -2 54.2461  9.0565   2
   5   5  -2 65.7094 10.6912   3
  -5  -5   2 76.2863  8.7164   5
  -5  -5   2 77.3587  5.8717   1
   4   5  -2 234.957  19.769   2
   4   5  -2 178.877  16.239   1
   4   5  -2 232.930  17.428   3
   4   5  -2 223.557  15.862   1
  -4  -5   2 229.927  17.532   5
  -4  -5   2 216.191  15.993   1
   3   5  -2 202.374  15.617   4
   3   5  -2 191.202  14.163   1
   3   5  -2 184.517  14.288   1
   3   5  -2 198.612  16.260   3
  -3  -5   2 194.814  29.325   5
   2   5  -2 1635.76  167.67   4
   2   5  -2 1809.50  133.83   1
   2   5  -2 2085.60  133.94   1
  -2  -5   2 2108.92  146.17   5
  -2  -5   2 2092.49  134.04   1
   1   5  -2 499.751  39.265   1
   1   5  -2 553.242  39.349   1
  -1  -5   2 610.628  42.339   5
  -1  -5   2 628.552  39.582   1
  -1  -5   2 534.625  39.371   1
   0   5  -2 275.583  19.423   1
   0   5  -2 258.740  28.410   4
   0   5  -2 268.417  19.390   1
   0  -5   2 272.720  27.011   4
   0  -5   2 279.012  19.445   1
  -1   5  -2 13.3471  2.7131   5
  -1   5  -2  7.0359 16.5726   1
  -1   5  -2 15.5754 21.7870   1
  -1   5  -2  3.4877 14.5887   4
   1  -5   2 20.2168 31.4267   1
   1  -5   2 17.7488  5.6010   5
  -3   5  -2 133.851  10.111   1
  -3   5  -2 120.606  13.350   4
   3  -5   2 139.720  10.661   5
   3  -5   2 135.645  13.383   1
   4  -5   2 4103.61  276.80   1
   4  -5   2 3989.58  281.57   1
  -5   5  -2 1118.41   76.56   5
  -5   5  -2 936.051  68.142   1
   5  -5   2 942.001  68.212   1
   5  -5   2 968.705  68.707   1
  -6   5  -2 735.213  51.122   1
   6  -5   2 727.356  50.800   1
  -7   5  -2 2.68595 2.36517   1
  -7   5  -2 -0.4779  2.9212   5
   7  -5   2 2.61266 8.27802   1
   7  -5   2 -0.6763  5.2375   1
  -8   5  -2 357.658  24.276   1
   8  -5   2 315.717  24.182   1
   8  -5   2 368.484  24.387   1
   8  -5   2 290.138  51.842   3
  -9   5  -2 0.57003 2.10710   1
   9  -5   2 4.77898 4.77070   1
   9  -5   2 -1.2233  4.0513   1
   9  -5   2 -1.1385 12.4848   3
 -10   5  -2 97.2313  7.7559   1
  10  -5   2 100.276   9.826   1
  10  -5   2 95.1203  7.8516   1
  10  -5   2 102.268  12.848   3
 -11   5  -2 183.670  13.806   1
  11  -5   2 202.429  20.256   3
  11  -5   2 185.218  13.951   1
 -12   5  -2 544.987  39.642   1
  12  -5   2 549.762  40.386   1
  12  -5   2 616.076  46.830   3
 -13   5  -2 54.0841  4.6696   1
 -13   5  -2 51.1726  5.0375   5
  13  -5   2 51.7269  8.4767   1
  13  -5   2 33.4931 24.2242   3
 -14   5  -2 8.06135 3.52957   5
  14  -5   2 -10.381   7.505   3
  14  -5   2 6.24243 2.77959   1
 -15   5  -2 98.5031  8.0567   5
  15  -5   2 77.6766  6.9780   1
  15  -5   2 107.754  10.934   3
 -16   5  -2 10.9547  2.5690   5
 -18   5  -2 14.4068  9.5878   4
  18  -5   2 24.8143  7.1498   3
 -19   5  -2 -11.969   6.701   4
 -20   5  -2 4.11495 7.37419   4
 -21   5  -2 29.0838  9.3346   4
 -22   5  -2 -3.6050  8.4818   4
 -23   5  -2 17.9865  9.4398   4
  21   4  -2 34.3442  8.5159   3
  20   4  -2 18.9341  7.4837   3
  19   4  -2 57.5182  9.4325   3
 -19  -4   2 49.4483  8.6204   5
 -18  -4   2 -8.3713 10.7386   5
  17   4  -2 21.5941  6.8048   3
  17   4  -2 11.4218  7.6604   2
 -17  -4   2 5.01108 5.89815   4
 -17  -4   2 14.1087  6.5330   5
  16   4  -2 -1.1604  5.7484   3
  16   4  -2 8.30744 7.00121   2
 -16  -4   2 -0.9889  8.6068   5
  15   4  -2 4.68469 6.99196   2
  15   4  -2 -3.2855  4.6368   3
 -15  -4   2 4.29867 6.65557   5
  14   4  -2 93.4136 10.9506   3
  14   4  -2 118.390  11.371   2
 -14  -4   2 108.203  10.981   5
  13   4  -2 386.703  32.963   3
  13   4  -2 423.673  32.384   2
 -13  -4   2 405.122  32.499   5
  12   4  -2 568.928  40.781   2
  12   4  -2 496.159  41.413   3
 -12  -4   2 497.134  40.641   5
  11   4  -2 4.48641 3.59637   1
  11   4  -2 3.91855 3.39954   3
  11   4  -2  7.9835 10.9934   2
 -11  -4   2  6.5820 11.6620   5
 -11  -4   2 0.81098 1.76166   1
  10   4  -2 5.52330 9.10343   2
  10   4  -2  2.3491 10.0964   3
  10   4  -2 4.42900 4.22668   1
 -10  -4   2 2.91711 6.00348   5
   9   4  -2 479.989  37.620   3
   9   4  -2 450.724  33.381   1
   9   4  -2 515.546  37.282   2
  -9  -4   2 395.407  46.314   1
  -9  -4   2 520.672  38.396   5
   8   4  -2 304.200  24.668   3
   8   4  -2 308.816  21.555   1
   8   4  -2 310.855  25.940   2
  -8  -4   2 301.571  25.355   5
   6   4  -2 712.845  50.137   3
   6   4  -2 563.738  44.892   1
   6   4  -2 696.356  49.459   2
   6   4  -2 662.243  44.949   1
  -6  -4   2 681.879  48.848   5
  -6  -4   2 582.000  45.587   1
   5   4  -2 42.6083  6.5746   1
   5   4  -2 58.8297  4.7915   1
   5   4  -2 53.1898  6.1432   3
  -5  -4   2 58.4075  5.5683   4
  -5  -4   2 63.2919  7.0759   1
  -5  -4   2 57.6388 13.7212   5
   4   4  -2 43.1932  4.1354   1
   4   4  -2 33.5112  9.6235   1
   4   4  -2 42.0973 10.3298   2
   4   4  -2 42.2372  6.1570   3
  -4  -4   2 32.0856  6.0692   1
  -4  -4   2 50.2679  5.3777   2
  -4  -4   2 45.7428 15.5774   5
  -4  -4   2 36.9117  4.6592   4
   3   4  -2 84.8130 37.1082   2
   3   4  -2 81.1173  7.4356   3
   3   4  -2 44.5314 41.8077   1
   3   4  -2 76.0606  6.4893   5
   3   4  -2 64.0168  5.8678   1
  -3  -4   2 47.2334 38.7353   1
  -3  -4   2 84.6357  7.6094   5
  -3  -4   2 47.4739 39.7718   2
   2   4  -2 1.13041 4.70097   1
   2   4  -2 -2.9201 13.0938   2
   2   4  -2 0.97022 6.41079   5
   2   4  -2 4.26933 1.90224   1
  -2  -4   2 -0.4268  4.1799   1
  -2  -4   2 -5.0261  8.1491   5
  -2  -4   2 1.11329 3.57316   1
   1   4  -2 176.682  12.280   1
  -1  -4   2 160.945  12.193   1
   0   4  -2 343.335  25.915   1
   0  -4   2 371.305  26.723   5
   0  -4   2 326.485  24.585   1
  -1   4  -2 60.3088  7.9542   5
  -1   4  -2 43.4264 20.4122   1
  -1   4  -2 32.6923 29.8908   4
   1  -4   2 42.5339 44.2969   1
   1  -4   2 59.7882  5.9596   5
   1  -4   2 70.4546  5.9753   1
  -2   4  -2 163.720  13.352   5
  -2   4  -2 141.876  11.023   1
  -2   4  -2 137.656  11.614   1
   2  -4   2 119.746  13.701   1
   2  -4   2 140.658  11.660   5
   2  -4   2 115.311  21.648   1
  -3   4  -2 -3.3367 19.6155   1
  -3   4  -2 -0.8521  6.1138   5
  -3   4  -2 -4.1904  7.1598   1
  -3   4  -2 -4.7277  5.2840   3
   3  -4   2 -4.8436 97.0248   1
   3  -4   2 -6.8106  6.9948   5
   3  -4   2 -1.9504 99.5081   1
  -4   4  -2 1446.00  102.45   5
  -4   4  -2 1336.98   98.18   3
   4  -4   2 1206.23  118.39   1
   4  -4   2 1154.78   88.56   1
  -5   4  -2 435.167  67.069   1
  -5   4  -2 452.213  93.969   1
  -5   4  -2 464.227  36.727   3
   5  -4   2 429.107 124.187   1
  -6   4  -2 116.051  12.024   1
   6  -4   2 130.158  23.209   3
   6  -4   2 109.137  11.880   1
   6  -4   2 123.781  14.269   1
  -7   4  -2 107.108   8.682   1
   7  -4   2 119.420  10.082   1
   7  -4   2 135.642  16.324   3
   7  -4   2 111.878  12.941   1
   8  -4   2 3821.52  289.40   3
  -9   4  -2 70.4302  5.4835   1
   9  -4   2 74.8297 22.5716   3
   9  -4   2 62.3701  9.1055   1
   9  -4   2 59.9422  8.2966   1
 -10   4  -2 2255.25  147.96   1
  10  -4   2 1799.88  196.76   1
  10  -4   2 2243.45  164.71   3
  10  -4   2 2200.65  147.81   1
 -11   4  -2 124.004   9.165   1
  11  -4   2 123.867  10.374   1
  11  -4   2 111.648  13.464   3
  11  -4   2 122.894   9.537   1
 -12   4  -2 102.222   7.745   1
 -12   4  -2 103.068  12.708   5
  12  -4   2 101.174   9.083   1
  12  -4   2 94.8945 14.3328   3
 -13   4  -2 173.078  12.905   1
 -13   4  -2 184.646  14.121   5
  13  -4   2 176.535  13.022   1
  13  -4   2 187.190  24.513   3
  14  -4   2 1025.19   80.32   3
 -15   4  -2 96.0417  8.3752   5
  15  -4   2 94.2290 10.8475   3
 -16   4  -2 56.7073  5.4327   5
  16  -4   2 38.4610  8.8875   3
  17  -4   2 94.2211 11.2147   3
  18  -4   2 -11.859   9.742   3
 -19   4  -2 5.89094 6.83649   4
  19  -4   2 -1.9930  5.4289   3
 -21   4  -2 19.5481  7.8855   4
  21  -4   2 20.6326  8.4507   3
 -23   4  -2 9.66262 8.45742   4
  21   3  -2 41.1502  8.9948   3
  20   3  -2 12.3323  6.9470   3
  19   3  -2 33.1235  8.1953   3
  18   3  -2 29.7285  8.4265   3
 -18  -3   2 13.9838 32.1082   4
 -18  -3   2 20.2728 21.8525   5
  17   3  -2 15.0922  7.1554   2
 -17  -3   2 1.13694 5.28555   5
 -17  -3   2 -4.3881  5.0065   4
  16   3  -2 200.854  18.330   2
  16   3  -2 191.977  18.905   3
 -16  -3   2 174.102  16.770   5
  15   3  -2 -5.3896  6.4240   2
  15   3  -2 -4.5860  7.5352   3
  14   3  -2 28.7443  7.0973   2
  14   3  -2 35.2284  9.8421   3
 -14  -3   2 33.7471  5.8244   5
  13   3  -2 69.9628 12.1029   3
  13   3  -2 77.7251  9.0827   2
 -13  -3   2 89.6085 15.7127   5
  12   3  -2 174.770  16.879   3
  12   3  -2 198.778  17.244   2
 -12  -3   2 197.999  16.811   5
  11   3  -2 20.6122 15.9331   2
  11   3  -2 15.8955  3.8594   3
 -11  -3   2 22.6000  7.7144   5
  10   3  -2 1143.81   81.34   2
  10   3  -2 1055.32   84.77   3
 -10  -3   2 1111.65   82.25   5
   9   3  -2 0.90473 1.70889   1
   9   3  -2 1.92508 8.13634   2
  -9  -3   2 -3.9785  4.7079   5
  -9  -3   2 -0.4652  0.9366   1
   8   3  -2 287.515  22.297   2
   8   3  -2 289.970  22.966   3
  -8  -3   2 289.652  25.915   5
  -8  -3   2 273.563  19.875   1
   7   3  -2 46.9356  5.3760   3
   7   3  -2 32.3583  5.2387   1
   7   3  -2 35.8326  4.6630   2
  -7  -3   2 34.0662  4.8654   1
  -7  -3   2 41.6123  5.6454   5
  -7  -3   2 34.5028  4.8694   1
   6   3  -2 1587.43  112.79   1
   6   3  -2 1682.32  125.27   3
   6   3  -2 1625.59  119.40   2
  -6  -3   2 1616.65  114.56   1
  -6  -3   2 1768.62  132.35   3
  -6  -3   2 1629.57  121.35   5
   5   3  -2 418.654  30.950   3
   5   3  -2 389.000  27.681   1
   5   3  -2 391.551  27.646   1
   5   3  -2 424.551  29.876   2
  -5  -3   2 354.034  27.595   1
  -5  -3   2 358.411  27.658   1
  -5  -3   2 386.090  86.600   5
  -5  -3   2 442.868  31.022   3
   3   3  -2 1120.14   80.74   1
   3   3  -2 1117.33   79.18   1
   3   3  -2 1158.51   84.91   5
   3   3  -2 1312.49   83.68   2
  -3  -3   2 1044.49   83.62   2
  -3  -3   2 1146.61   98.98   4
  -3  -3   2 1165.95   87.82   5
  -3  -3   2 1186.16   94.11   1
  -2  -3   2 2473.67  184.33   1
  -2  -3   2 2840.85  194.61   5
   1   3  -2 2.35162 2.63305   5
   1   3  -2  0.7342 10.4508   1
   1   3  -2 1.08869 3.60092   1
  -1  -3   2 -0.4878  9.3242   5
  -1  -3   2 -1.4443 11.5386   1
  -1  -3   2 2.00830 2.40780   1
   0   3  -2 97.0056 14.5906   1
   0   3  -2 88.1738  8.7100   1
   0  -3   2 83.6482  9.9772   1
   0  -3   2 109.426  12.677   5
   0  -3   2 93.8371  7.1858   1
  -1   3  -2 17.8171  2.5606   1
   1  -3   2 10.8647 11.0397   1
   1  -3   2 17.3875  3.1309   5
   1  -3   2 9.53430 3.48795   1
  -3   3  -2 38.7738  9.6370   1
  -3   3  -2 42.2004  8.0146   1
   3  -3   2 26.3818  3.5961   1
   3  -3   2 26.0075 13.8380   3
   3  -3   2 14.4774  8.9566   1
  -5   3  -2 192.346  15.868   1
  -5   3  -2 240.611  19.155   1
   5  -3   2 212.611  20.623   1
   5  -3   2 225.005  15.618   1
   5  -3   2 244.774  30.982   3
  -6   3  -2 2909.31  244.01   1
  -6   3  -2 3312.35  224.41   1
   6  -3   2 3281.95  224.42   1
   6  -3   2 3588.27  248.85   3
  -7   3  -2 13.8387  2.1433   1
  -7   3  -2 13.1291  3.8784   1
   7  -3   2 16.6610  2.2754   1
   7  -3   2 13.6002  6.0329   1
   7  -3   2 13.6334  6.4936   3
  -8   3  -2 1352.88   90.17   1
   8  -3   2 1357.98  100.66   3
   8  -3   2 1152.63  102.38   1
   8  -3   2 1365.96   90.19   1
  -9   3  -2 29.7136  4.1298   1
   9  -3   2 33.2600  6.9601   1
   9  -3   2 33.8182  6.6281   3
   9  -3   2 28.4289  4.7915   1
 -10   3  -2 1915.57  163.18   5
 -10   3  -2 1979.45  155.12   1
  10  -3   2 2105.50  154.09   3
  10  -3   2 2053.65  138.87   1
 -11   3  -2 53.3990  4.5652   1
 -11   3  -2 52.4996  8.5215   5
  11  -3   2 51.5084 15.2778   3
  11  -3   2 54.8147  5.4988   1
 -12   3  -2 62.9429  5.2051   1
 -12   3  -2 69.6312  5.9259   5
  12  -3   2 57.9906  7.7150   1
  12  -3   2 67.6505 15.3271   3
 -13   3  -2 1.33127 1.04772   1
 -13   3  -2 -0.7441  2.0992   5
  13  -3   2 0.95903 1.25537   1
  13  -3   2 -11.632   7.085   3
 -14   3  -2 89.7026  7.8030   5
  14  -3   2 82.3730 13.2503   3
 -15   3  -2 519.097  37.227   5
  15  -3   2 462.333  40.345   3
 -16   3  -2 210.616  17.097   5
  16  -3   2 215.646  20.221   3
  17  -3   2 118.104  13.563   3
  18  -3   2 112.473  12.791   3
  19  -3   2 17.6006  7.7709   3
 -20   3  -2 2.22349 7.72264   4
  20  -3   2 24.7093  8.4998   3
 -21   3  -2 8.20008 7.32665   4
  21  -3   2 7.19844 5.77986   3
 -22   3  -2 3.20748 8.17068   4
  22  -3   2 18.8682  8.5739   3
  22   2  -2 12.8948  7.3759   3
  21   2  -2 23.0803  8.1379   3
  20   2  -2 -7.1131  7.1471   3
  19   2  -2 2.94676 6.59135   3
  18   2  -2 22.9666  7.7457   3
  18   2  -2 2.50985 6.56440   2
 -18  -2   2 -1.0778 16.8801   4
  17   2  -2 29.6291  7.6545   2
  17   2  -2 30.2941  6.8429   3
  16   2  -2 110.230  12.536   3
  16   2  -2 126.964  13.254   2
 -16  -2   2 109.441  12.616   4
 -16  -2   2 123.823  12.235   5
  15   2  -2 104.783  11.056   3
  15   2  -2 117.320  11.979   2
 -15  -2   2 88.0605 10.1815   5
  14   2  -2 82.5471  9.0231   3
  14   2  -2 88.4448 15.3677   2
 -14  -2   2 68.2773 11.7538   5
  13   2  -2 3.76467 5.81087   2
 -13  -2   2 -3.5234 12.1772   5
  12   2  -2 96.0770 14.5344   2
  12   2  -2 93.1300 10.6957   3
 -12  -2   2 96.3114 14.9756   5
  11   2  -2 170.090  14.933   3
  11   2  -2 169.640  14.617   2
 -11  -2   2 158.077  15.663   5
  10   2  -2 1086.40   87.10   3
  10   2  -2 1197.13   83.49   2
 -10  -2   2 1118.77   84.30   5
   9   2  -2 163.514  13.833   2
   9   2  -2 158.393  16.545   3
  -9  -2   2 159.615  13.575   5
   8   2  -2 6900.51  485.28   2
  -8  -2   2 6617.69  495.28   5
   7   2  -2 -2.6252  7.8205   3
   7   2  -2 0.39018 2.76626   1
   7   2  -2 -3.0016 10.2711   2
  -7  -2   2 -0.6043  0.6403   1
  -7  -2   2 -7.9568 10.3533   5
   6   2  -2 674.719  49.384   3
   6   2  -2 727.730  47.537   2
   6   2  -2 540.131  44.998   1
  -6  -2   2 580.397  47.833   1
  -6  -2   2 673.253  47.901   5
   5   2  -2 200.410  14.421   2
   5   2  -2 191.317  14.739   3
   5   2  -2 158.087  12.793   1
  -5  -2   2 182.521  12.802   1
  -5  -2   2 189.645  63.048   5
   3   2  -2 497.647  44.248   1
   3   2  -2 469.468  36.338   1
   3   2  -2 576.295  38.724   2
   3   2  -2 544.229  40.031   3
  -3  -2   2 527.797  38.510   2
  -3  -2   2 457.336  36.037   1
  -3  -2   2 483.982  36.422   1
  -3  -2   2 593.955  40.097   3
  -3  -2   2 500.864 252.700   5
   1   2  -2 68.0835  6.0181   5
   1   2  -2 63.1081  5.7420   1
   1   2  -2 73.6152  5.6449   1
  -1  -2   2  59.859 111.691   5
  -1  -2   2 70.5952  6.0666   1
  -1  -2   2 64.2191  5.5552   1
  -1   2  -2  6.9667 12.9282   1
  -1   2  -2 10.4672  9.6692   1
  -1   2  -2  7.6305 10.3848   5
  -1   2  -2 11.3638 16.9404   3
   1  -2   2 14.0934 12.7486   5
   1  -2   2  2.3885 11.7466   1
   1  -2   2  8.1612 11.2754   3
   1  -2   2  3.5380 35.9948   1
  -3   2  -2 41.3336  4.7903   1
  -3   2  -2 45.8017  3.6707   1
  -3   2  -2 47.5796  4.9360   3
   3  -2   2 41.9859  6.4028   1
   3  -2   2  43.884 159.196   1
   3  -2   2 50.2127  6.6836   3
  -5   2  -2 44.5608  4.4713   3
  -5   2  -2 40.3492  4.2336   1
  -5   2  -2 44.0689  3.6595   1
   5  -2   2 46.6551  4.9032   3
   5  -2   2 50.9418  7.4197   1
   5  -2   2 41.3335  5.1897   1
  -6   2  -2 282.276  23.016   5
  -6   2  -2 347.348  21.843   1
   6  -2   2 341.859  22.193   1
   6  -2   2 275.405  22.264   1
  -7   2  -2 539.766  37.908   1
   7  -2   2 577.126  37.957   1
   7  -2   2 473.074  40.938   1
   7  -2   2 598.079  42.859   3
  -8   2  -2 1211.40  124.23   5
  -8   2  -2 1372.02  155.14   1
   8  -2   2 1461.64   92.42   1
   8  -2   2 1238.08  161.72   1
  -9   2  -2 32.6911  6.3052   5
  -9   2  -2 35.6047  3.0601   1
   9  -2   2 33.2115  3.8901   1
   9  -2   2 31.0483 10.7467   3
 -10   2  -2 511.973  36.082   5
 -10   2  -2 436.603  33.383   1
  10  -2   2 460.111  33.357   1
  10  -2   2 526.480  40.759   3
 -11   2  -2 231.801  18.696   1
 -11   2  -2 284.676  20.490   5
  11  -2   2 265.923  18.777   1
  11  -2   2 291.847  22.998   3
 -12   2  -2 13.1934  2.9595   5
 -12   2  -2 14.3334  1.6588   1
  12  -2   2 11.5463  2.6105   1
  12  -2   2 10.3433 25.5426   3
  12  -2   2 14.7342  1.7237   1
 -13   2  -2 372.564  27.793   5
  13  -2   2 354.604  30.137   3
 -14   2  -2 26.9678  5.4778   5
  14  -2   2 42.6469 11.3186   3
 -15   2  -2 49.4594 10.7652   5
  15  -2   2 39.7331  8.1502   3
 -16   2  -2 16.1659  3.7237   5
  16  -2   2 13.8546  5.6442   3
  17  -2   2 16.7711  7.4730   3
  18  -2   2 90.6757 12.1713   3
  19  -2   2 18.6176  7.2683   3
  20  -2   2 57.5434  9.2904   3
 -21   2  -2 38.2561 10.0843   4
  21  -2   2 34.5550  8.9375   3
  22  -2   2 58.5412 11.4498   3
  22   1  -2 57.4682 10.4666   3
  21   1  -2 44.5108  9.1348   3
  20   1  -2 -3.6939  6.6815   3
 -20  -1   2 -0.6751  5.5699   4
  18   1  -2 69.8203  9.3731   3
 -18  -1   2 69.8796 10.6931   5
 -18  -1   2 73.7843 10.2212   4
  17   1  -2 2.30050 5.57093   3
  17   1  -2 4.67071 6.46985   2
 -17  -1   2 1.70775 4.93775   5
 -17  -1   2 3.11021 4.96156   4
  16   1  -2 55.4842  8.4250   3
  16   1  -2 42.2465  8.0627   2
 -16  -1   2 33.0154  7.1764   4
 -16  -1   2 50.1375  6.7004   5
  15   1  -2 367.660  31.816   3
  15   1  -2 406.998  31.004   2
 -15  -1   2 365.314  32.581   4
 -15  -1   2 388.374  30.429   5
  14   1  -2 52.6244  7.4084   2
  14   1  -2 58.6300  8.2792   3
 -14  -1   2 55.2390  8.0248   5
  13   1  -2 52.3781  7.1777   2
  13   1  -2 61.2128  7.3438   3
 -13  -1   2 58.5528  7.3597   5
  12   1  -2 418.790  36.535   3
  12   1  -2 408.989  32.825   2
 -12  -1   2 425.853  32.407   5
  11   1  -2 561.310  43.418   2
  11   1  -2 571.310  45.130   3
 -11  -1   2 579.542  43.432   5
  10   1  -2 284.837  24.014   2
  10   1  -2 278.762  26.496   3
 -10  -1   2 260.181  24.444   5
   9   1  -2 408.997  33.091   3
   9   1  -2 426.128  31.982   2
  -9  -1   2 421.603  32.695   5
   8   1  -2 1204.68   92.72   3
   8   1  -2 1218.61   88.48   2
  -8  -1   2 1215.35   89.59   5
   7   1  -2 379.653  30.000   3
   7   1  -2 382.241  28.854   2
  -7  -1   2 384.053  29.591   5
   5   1  -2 526.453  38.946   2
   5   1  -2 513.365  40.667   3
   5   1  -2 508.498  36.237   1
  -5  -1   2 478.683  38.075   1
  -5  -1   2 567.137  40.833   3
  -5  -1   2 518.622  36.224   1
  -5  -1   2 588.291  39.050   2
   3   1  -2 11.2057  3.9468   2
   3   1  -2 12.8299  1.7969   1
   3   1  -2 14.0764  1.9418   3
  -3  -1   2 13.6408  1.7701   4
  -3  -1   2 10.1713  2.0911   3
  -3  -1   2 13.9242  2.7573   2
  -3  -1   2 12.6387  1.6418   1
  -3  -1   2 12.2265  1.4993   1
  -3   1  -2 217.979  16.453   1
  -3   1  -2 211.628  18.317   3
  -3   1  -2 251.108  16.700   1
   3  -1   2 267.152  18.528   3
   3  -1   2 222.318  24.698   1
  -4   1  -2 1919.07  140.94   1
  -4   1  -2 1758.66  152.55   1
  -4   1  -2 2130.18  152.86   3
   4  -1   2 1963.69  137.85   1
   4  -1   2 2275.52  153.10   3
  -5   1  -2 532.109  38.214   1
  -5   1  -2 513.292  42.362   1
  -5   1  -2 652.666  41.552   5
  -5   1  -2 505.986  40.447   2
   5  -1   2 589.263  38.311   1
   5  -1   2 530.911  39.709   1
  -6   1  -2 150.148  48.888   1
  -6   1  -2 204.449  32.102   1
  -6   1  -2 183.774  15.085   5
   6  -1   2 188.014  28.192   1
   6  -1   2 157.653  14.928   1
  -7   1  -2 143.377  11.100   1
  -7   1  -2 150.147  11.079   1
   7  -1   2 140.185  11.170   1
   7  -1   2 163.804  11.844   1
   7  -1   2 184.505  13.346   3
  -8   1  -2 519.865  41.400   1
  -8   1  -2 505.580  62.221   1
   8  -1   2 495.470  38.057   1
  -9   1  -2 116.729   9.685   5
   9  -1   2 122.500  10.755   3
   9  -1   2 96.2936  8.0159   1
 -10   1  -2 1238.26   83.71   5
  10  -1   2 1202.48   87.76   3
  10  -1   2 970.186  77.723   1
 -11   1  -2 414.560  29.199   5
 -11   1  -2 377.381  26.645   1
  11  -1   2 327.485  38.148   1
  11  -1   2 405.682  31.471   3
  11  -1   2 372.147  26.623   1
 -12   1  -2 267.748  20.071   5
  12  -1   2 243.631  21.837   3
 -13   1  -2 132.860  11.232   5
  13  -1   2 131.595  13.029   3
 -14   1  -2 231.462  23.683   5
  14  -1   2 281.551  25.720   3
 -15   1  -2 102.227   9.828   5
  15  -1   2 122.223  12.620   3
 -16   1  -2 40.4147  5.3639   5
  16  -1   2 47.8072  8.6521   3
 -17   1  -2 3.49883 3.03398   5
  17  -1   2 6.58137 6.52640   3
  18  -1   2 42.0857  7.9607   3
  19  -1   2 56.1726  8.4074   3
  20  -1   2 -0.9471  6.4418   3
  21  -1   2 -13.507   7.757   3
 -22   1  -2 47.8221 10.1470   4
  22   0  -2 17.2478  7.8959   3
  21   0  -2 8.04411 7.21147   3
 -21   0   2 9.18320 6.07274   4
  20   0  -2 147.753  15.552   3
 -20   0   2 119.146  14.559   4
  19   0  -2 11.4451  5.1297   3
 -19   0   2 18.8681  5.6817   5
 -19   0   2 23.3585  6.6494   4
  18   0  -2 20.0590  7.5169   3
  17   0  -2 2.22555 6.64889   2
 -17   0   2 3.36050 4.39664   5
 -17   0   2 -0.6498  4.9674   4
  16   0  -2 1.26523 7.09790   3
  16   0  -2 5.28047 6.19539   2
 -16   0   2 1.18554 5.69612   4
 -16   0   2 12.2962  5.1599   5
  15   0  -2 322.146  27.298   2
  15   0  -2 315.200  28.010   3
 -15   0   2 323.738  28.759   4
 -15   0   2 361.720  26.833   5
  14   0  -2 120.081  12.864   2
  14   0  -2 115.116  12.625   3
 -14   0   2 128.597  11.290   5
 -14   0   2 119.195  12.629   4
  13   0  -2 33.6584  6.5179   2
  13   0  -2 22.6541  5.2068   3
  12   0  -2 97.4094 23.0437   2
  12   0  -2 91.2138 24.8814   3
  11   0  -2 4.44863 7.65243   3
 -11   0   2 -0.1208  3.6981   5
  10   0  -2 1722.76  126.71   2
  10   0  -2 1767.19  133.02   3
 -10   0   2 1737.24  128.28   5
   9   0  -2 40.7785  5.3362   2
   9   0  -2 30.5342  4.4409   3
   8   0  -2 22.0421 17.6594   2
   8   0  -2 22.9043 13.8216   3
   7   0  -2 357.302  28.173   3
   7   0  -2 355.923  27.093   2
  -6   0   2 4529.66  347.43   3
   5   0  -2 393.813  32.069   3
   5   0  -2 423.632  30.775   2
  -5   0   2 409.594  33.120   4
  -5   0   2 437.789  30.716   2
  -5   0   2 408.414  32.126   3
   4   0  -2 143.462  11.284   3
   4   0  -2 142.623  10.279   1
  -4   0   2 133.673   9.973   1
  -4   0   2 131.981  11.881   1
   3   0  -2 8.62947 2.22681   3
   3   0  -2 9.35509 1.68262   2
   3   0  -2 6.06255 2.09933   1
   3   0  -2 4.86021 1.68439   4
  -3   0   2 7.40707 0.90651   1
  -3   0   2 7.29345 5.67679   4
  -3   0   2 5.72009 3.65637   2
  -3   0   2 8.11543 0.98789   1
  -2   0  -2 1631.82  133.46   3
  -2   0  -2 1608.71  145.18   1
  -2   0  -2 1614.68  144.79   1
   2   0   2 1840.11  136.19   3
   2   0   2 1613.49  128.06   1
   2   0   2 1598.55  140.17   1
  -3   0  -2 173.390  12.802   3
  -3   0  -2 143.329  11.973   1
  -3   0  -2 170.658  12.249   1
   3   0   2 140.705  11.651   1
   3   0   2 175.301  11.990   5
   3   0   2 148.201  12.815   1
   3   0   2 168.150  13.404   3
  -4   0  -2 2994.85  221.95   2
  -5   0  -2 953.538 108.718   1
  -5   0  -2 1088.74   83.52   1
  -5   0  -2 1116.95   81.90   2
   5   0   2 1181.81   82.97   5
   5   0   2 1236.35   86.41   3
   5   0   2 1073.83   96.34   1
   5   0   2 1170.32   78.13   1
  -6   0  -2 2287.75  224.74   1
  -6   0  -2 2296.35  301.65   1
   6   0   2 2590.00  254.80   1
   6   0   2 2495.02  183.17   1
  -7   0  -2 25.6056  2.8455   1
  -7   0  -2 24.4260  2.5065   1
   7   0   2 34.3815  6.6949   1
   7   0   2 30.8676  5.3885   1
   7   0   2 32.5308  7.6115   3
  -8   0  -2 27.5029  4.1001   5
  -8   0  -2 23.5124  4.3778   1
  -8   0  -2 24.0083  4.1018   1
   8   0   2 28.6383 13.1196   3
   8   0   2 24.1402  4.1116   1
  -9   0  -2 9.51392 2.46117   5
  -9   0  -2 8.21068 1.47104   1
   9   0   2 11.8591  1.5876   1
   9   0   2 11.8254  9.4930   3
 -10   0  -2 19.2651  5.2871   5
 -10   0  -2 12.9883  2.9719   1
  10   0   2 28.1555 12.5092   3
 -11   0  -2 124.549  10.732   5
  11   0   2 114.531   8.501   1
  11   0   2 96.4441  7.9499   1
  11   0   2 110.181  10.674   3
 -12   0  -2 346.638  26.702   5
  12   0   2 342.388  29.259   3
 -13   0  -2 517.420  40.450   5
  13   0   2 532.726  42.195   3
 -14   0  -2 483.694  38.534   5
  14   0   2 515.598  40.706   3
 -15   0  -2 1.47835 3.01876   5
 -16   0  -2 55.1204  7.5912   5
 -17   0  -2 15.3414  4.0044   5
  17   0   2 17.5441  6.8444   3
  19   0   2 -8.3732  6.8281   3
  20   0   2 21.9419  7.9586   3
  21   0   2 2.74422 7.02961   3
 -22   0  -2 20.2256  9.0949   4
  22   0   2 22.1022  9.0280   3
  21  -1  -2 5.85399 7.32723   3
 -21   1   2 6.50021 6.37393   4
 -20   1   2 35.6109  8.3334   4
  19  -1  -2 36.7449  8.4375   3
 -19   1   2 27.2204  7.4443   4
 -19   1   2 40.9907  6.5657   5
 -18   1   2 72.4109  9.6511   4
 -18   1   2 77.7265  8.9540   5
  17  -1  -2 56.1145  8.1132   3
 -17   1   2 66.8061  9.2856   4
 -17   1   2 59.0544  7.6448   5
  16  -1  -2 136.567  14.011   3
  16  -1  -2 130.939  16.605   2
 -16   1   2 127.273  12.094   5
 -16   1   2 104.108  13.815   4
  15  -1  -2 -11.091   6.993   2
  15  -1  -2 7.88820 5.97185   3
 -15   1   2 -3.2541  4.3041   5
 -15   1   2 -6.7562  4.8944   4
  14  -1  -2 10.5845  7.1937   2
  14  -1  -2 20.0995 10.9242   3
 -14   1   2 17.2938  6.8994   4
 -14   1   2 19.8094  4.5460   5
  13  -1  -2 114.001  12.010   2
  13  -1  -2 121.995  11.808   3
 -13   1   2 117.065  12.283   4
 -13   1   2 128.250  11.139   5
  12  -1  -2 49.6576 20.8342   2
  12  -1  -2 78.0697 21.2223   3
 -12   1   2 37.4445  7.5271   5
 -12   1   2 40.3570 15.2322   4
  11  -1  -2 19.8743 12.5726   3
 -11   1   2 -0.9412  5.6919   4
  10  -1  -2 319.900  31.505   3
  10  -1  -2 297.672  27.398   2
 -10   1   2 286.814  25.162   4
   9  -1  -2 808.395  59.021   2
   9  -1  -2 785.421  61.873   3
  -9   1   2 806.578  63.840   4
   8  -1  -2 2901.31  211.98   2
   8  -1  -2 2920.85  222.91   3
  -8   1   2 3003.58  230.43   4
   7  -1  -2 346.587  26.168   2
   7  -1  -2 337.281  27.279   3
  -7   1   2 354.385  28.176   4
   6  -1  -2 857.091  60.670   2
   6  -1  -2 909.000  63.803   3
  -6   1   2 770.356  63.627   3
  -6   1   2 783.546  67.650   4
   5  -1  -2 49.2932  4.9954   1
   5  -1  -2 38.0023  4.9146   3
   5  -1  -2 49.8374  4.8407   2
  -5   1   2 47.2131  3.4517   1
  -5   1   2 46.8490  4.7842   4
  -5   1   2 49.4681  4.7038   3
  -5   1   2 48.8829  3.5888   1
  -5   1   2 45.3243  4.5188   2
   3  -1  -2 131.154  10.242   2
   3  -1  -2 129.460   9.402   1
   3  -1  -2 138.868  11.182   4
   3  -1  -2 126.909   9.623   1
  -3   1   2 133.193  11.155   4
  -3   1   2 138.699  10.223   2
  -3   1   2 133.205   9.400   1
  -3   1   2 132.495   9.397   1
  -3   1   2 137.684  10.722   3
   2  -1  -2 64.6425 28.6991   4
   2  -1  -2 92.7891  7.3416   2
   2  -1  -2 81.8196  6.8524   1
   2  -1  -2 84.0068  6.6842   1
  -2   1   2 77.8673 60.8533   4
  -2   1   2 96.1736  7.2179   2
  -1  -1  -2 145.445  23.819   5
  -1  -1  -2 112.539  28.663   1
  -1  -1  -2 105.463  20.550   4
  -1  -1  -2 102.673  13.898   1
   1   1   2 111.663  36.734   1
   1   1   2 122.670  12.249   4
   1   1   2 115.735  31.136   5
   1   1   2 123.550  10.436   1
  -3  -1  -2 7.81636 3.03213   1
  -3  -1  -2 4.99917 4.38903   1
  -3  -1  -2 6.05774 1.82198   3
  -3  -1  -2 5.43315 2.18275   5
  -3  -1  -2 3.10305 2.06596   2
   3   1   2  7.5602 18.8421   1
   3   1   2 8.98312 2.81349   3
   3   1   2 4.64266 3.94225   1
   3   1   2 8.88825 3.32059   5
  -4  -1  -2 279.510  20.794   1
  -4  -1  -2 289.257  21.395   1
  -4  -1  -2 342.155  25.996   3
   4   1   2 337.885  33.134   3
   4   1   2 316.750  23.171   5
   4   1   2 264.813  22.052   1
   4   1   2 268.655  22.994   1
  -5  -1  -2 246.658  20.388   2
  -5  -1  -2 237.246  19.106   1
   5   1   2 281.857  19.206   1
   5   1   2 290.076  20.504   5
   5   1   2 309.114  21.856   3
  -6  -1  -2 246.631  17.736   1
  -6  -1  -2 224.299  18.914   1
   6   1   2 264.687  18.982   5
   6   1   2 232.918  18.694   1
   6   1   2 282.398  17.825   1
  -7  -1  -2 97.3963  8.2528   1
  -7  -1  -2 99.1212  8.3373   1
   7   1   2 131.989   8.520   1
   7   1   2 108.117   8.381   1
   7   1   2 131.036   9.151   5
  -8  -1  -2 1422.36   93.47   5
  -8  -1  -2 1191.84   93.00   1
   8   1   2 961.438 127.532   1
   8   1   2 1322.97   92.88   3
   8   1   2 1007.96   90.76   1
  -9  -1  -2 25.3335  2.5226   1
   9   1   2 24.0353  3.2104   1
 -10  -1  -2 54.4711  4.5028   1
  10   1   2 55.9319  4.7970   1
  10   1   2 89.1921 21.0071   3
 -11  -1  -2 184.839  18.766   1
  11   1   2 185.547  13.159   1
 -12  -1  -2 -4.5576  7.3668   5
  12   1   2 15.8359  5.4487   1
  12   1   2 5.25324 4.46349   1
 -13  -1  -2 137.034  12.238   5
  13   1   2 138.350  13.475   3
  14   1   2 22.1280 16.9732   3
 -15  -1  -2 -1.7802  3.4603   5
  15   1   2 -8.2972  5.7870   3
 -16  -1  -2 12.4264  4.2110   5
  16   1   2 16.9751  6.9113   3
 -17  -1  -2 32.3010  5.4219   5
  17   1   2 37.8687  7.9359   3
  18   1   2 2.18743 6.57377   3
  19   1   2 25.4096  7.4383   3
  20   1   2 20.7637  7.7420   3
  21   1   2 -10.311   7.090   3
  22   1   2 6.84358 8.04727   3
 -22   2   2 75.0251 11.6334   4
  19  -2  -2 5.12796 6.93311   3
 -19   2   2 -1.1054  6.2269   4
 -19   2   2 -1.1448  4.3570   5
 -18   2   2 25.6970  7.3986   5
 -18   2   2 24.3372  8.5557   4
  17  -2  -2 -6.8322  6.5025   3
 -17   2   2 0.87133 3.50522   5
 -17   2   2 -4.4882  4.7460   4
  16  -2  -2 198.966  19.480   2
  16  -2  -2 217.363  20.422   3
 -16   2   2 243.455  23.463   4
 -16   2   2 242.284  19.551   5
  15  -2  -2 48.5744  8.2242   3
  15  -2  -2 53.1035  7.2812   2
 -15   2   2 53.9476  7.7385   4
 -15   2   2 50.6300  6.4142   5
  14  -2  -2 126.022  15.703   2
  14  -2  -2 180.788  25.604   3
 -14   2   2 174.465  15.805   4
 -14   2   2 139.985  13.526   5
  13  -2  -2 86.6992  9.6795   3
  13  -2  -2 85.5869 10.2512   2
 -13   2   2 100.324  10.337   4
  12  -2  -2 136.559  13.704   3
  12  -2  -2 137.527  22.435   2
 -12   2   2 169.324  20.451   4
  11  -2  -2 791.135  62.991   3
  11  -2  -2 775.026  60.017   2
 -11   2   2 860.439  65.244   4
  10  -2  -2 2920.52  220.16   2
  10  -2  -2 2976.00  231.59   3
 -10   2   2 3261.36  239.56   4
   9  -2  -2 6.96594 3.61530   2
   9  -2  -2 0.14890 9.25527   3
  -9   2   2 7.75125 3.44084   4
   8  -2  -2 875.377  68.019   3
   8  -2  -2 859.258  64.732   2
  -8   2   2 917.907  70.389   4
   7  -2  -2 940.287  63.533   1
   7  -2  -2 914.980  71.093   3
   7  -2  -2 907.551  67.552   2
  -7   2   2 965.865  73.536   4
  -7   2   2 890.882  63.387   1
  -7   2   2 943.561  63.387   1
   6  -2  -2 1534.44  111.95   2
   6  -2  -2 1541.64  106.18   1
  -6   2   2 1516.25  112.87   2
  -6   2   2 1610.28  124.38   4
   5  -2  -2 113.975   9.753   2
   5  -2  -2 126.135   9.817   1
  -5   2   2 128.100  10.608   3
  -5   2   2 124.956   8.864   1
  -5   2   2 122.498   9.794   2
  -5   2   2 128.172   8.897   1
  -5   2   2 127.164  10.898   4
   3  -2  -2 -0.5312  3.2697   1
   3  -2  -2 -4.2955 10.0989   1
   3  -2  -2 -2.4271  1.7725   2
   3  -2  -2 -0.3220  1.9385   4
  -3   2   2 -2.0950  1.1732   2
  -3   2   2 -0.2630  2.3225   4
  -3   2   2 -2.1788  1.0520   1
  -3   2   2 -3.7430 20.1843   1
   1  -2  -2 -1.8908  3.1878   1
   1  -2  -2 3.66270 3.57011   4
   1  -2  -2  0.3848 70.5275   1
  -1   2   2  1.7209 14.1456   1
  -1   2   2 -0.1100  6.0396   4
  -1  -2  -2 -1.4596 15.0903   5
  -1  -2  -2 3.17965 3.76462   1
  -1  -2  -2  3.7600 12.2443   1
  -1  -2  -2 5.37387 5.77653   4
   1   2   2 -0.2045 44.2779   1
   1   2   2 8.37901 4.65912   5
   1   2   2 -5.1761  8.2333   4
   1   2   2 5.87583 4.59366   1
  -3  -2  -2 4.59728 5.09997   1
  -3  -2  -2 8.23761 1.87405   2
  -3  -2  -2 8.94627 2.80259   4
   3   2   2 8.90200 3.05721   3
   3   2   2 7.36460 1.44896   5
   3   2   2 9.91181 5.30668   1
   3   2   2 1.96114 7.76402   1
  -5  -2  -2 171.375  16.868   2
  -5  -2  -2 170.901  13.794   1
  -5  -2  -2 226.815  77.464   5
   5   2   2 177.616  14.336   1
   5   2   2 214.305  15.094   2
   5   2   2 212.460  16.508   3
   5   2   2 208.939  14.962   5
  -6  -2  -2 2008.53  277.47   1
  -6  -2  -2 2049.06  254.11   1
  -6  -2  -2 2777.39  193.14   5
   6   2   2 2733.08  189.89   2
   6   2   2 2771.31  203.46   3
  -7  -2  -2 5.00648 2.18513   1
  -7  -2  -2 9.19909 3.82125   5
   7   2   2 9.76627 5.32424   2
   7   2   2 4.45480 4.59749   1
   7   2   2 8.31314 8.81678   3
   7   2   2 2.28230 3.35855   1
   7   2   2 8.60758 1.89130   5
  -8  -2  -2 330.384  24.268   1
  -8  -2  -2 365.565  26.402   5
   8   2   2 360.320  24.135   1
   8   2   2 299.117  24.042   1
   8   2   2 348.844  26.218   2
   8   2   2 353.363  28.424   3
  -9  -2  -2 306.674  27.125   1
   9   2   2 301.532  23.948   1
   9   2   2 286.371  22.672   1
 -10  -2  -2 2172.83  162.93   5
 -10  -2  -2 1638.75  234.09   1
  10   2   2 2162.45  158.31   3
 -11  -2  -2 81.4287  6.2195   1
  11   2   2 75.6319  7.2723   1
 -12  -2  -2 739.492  76.881   1
 -12  -2  -2 802.008  63.672   5
  12   2   2 746.634  62.726   1
  12   2   2 834.812  60.066   3
  12   2   2 674.311  55.228   1
 -13  -2  -2 481.784  38.434   5
  13   2   2 511.891  40.255   3
 -14  -2  -2 241.715  20.629   5
  14   2   2 267.219  23.032   3
 -15  -2  -2 62.1076  9.6932   5
  15   2   2 66.0073  8.5222   3
 -16  -2  -2 32.2244  5.7026   5
  16   2   2 28.8740  6.0796   3
  17   2   2 10.2764  6.1599   3
  18   2   2 7.02331 9.60580   3
  19   2   2 -11.927   7.172   3
  20   2   2 31.5497  8.5154   3
 -23   3   2 12.5928  7.3326   4
 -22   3   2 7.28162 7.85445   4
 -21   3   2 56.4378  9.7836   4
 -20   3   2 7.03314 6.85566   4
 -19   3   2 58.7622  9.6889   4
 -18   3   2 36.7700  8.6962   4
 -18   3   2 40.2423  5.9525   5
  17  -3  -2 14.0931  5.3633   3
 -17   3   2 14.4818  4.4497   5
  16  -3  -2 203.991  22.717   3
 -16   3   2 177.954  16.980   5
 -16   3   2 242.920  24.416   4
  15  -3  -2 88.4415 10.1448   2
  15  -3  -2 99.8166 11.3962   3
 -15   3   2 100.695   9.645   5
 -15   3   2 107.231  11.070   4
  14  -3  -2 63.5254  9.7458   2
  14  -3  -2 71.3520 18.8014   3
 -14   3   2 71.1443 13.4080   4
  13  -3  -2 -0.9044 12.0897   3
  13  -3  -2 -0.6179  9.4475   2
  12  -3  -2 184.633  17.376   3
  12  -3  -2 153.560  22.664   2
 -12   3   2 201.203  17.898   4
  11  -3  -2 389.311  31.549   2
  11  -3  -2 406.534  35.944   3
 -11   3   2 436.713  34.873   4
  10  -3  -2 37.6472 16.5965   3
  10  -3  -2 30.6177  7.3661   2
   9  -3  -2 779.917  51.873   1
   9  -3  -2 684.534  55.522   1
   9  -3  -2 741.627  55.627   2
  -9   3   2 780.405  51.823   1
  -9   3   2 744.014  53.963   1
  -9   3   2 797.473  60.684   4
   8  -3  -2 500.665  38.964   2
   8  -3  -2 517.352  36.264   1
  -8   3   2 501.469  37.437   1
  -8   3   2 628.418  54.781   4
  -8   3   2 518.333  36.209   1
   7  -3  -2 15.3925  3.8585   1
   7  -3  -2 18.6894  3.3338   2
  -7   3   2 11.9151  5.9070   4
  -7   3   2 17.5447  1.8031   1
  -7   3   2 17.6046  1.7614   1
   6  -3  -2 3233.17  236.48   2
  -6   3   2 3455.02  257.25   4
  -6   3   2 3172.09  238.68   2
   5  -3  -2 215.246  16.292   4
   5  -3  -2 178.366  14.437   2
   5  -3  -2 181.522  13.535   1
   5  -3  -2 186.588  13.754   1
  -5   3   2 181.986  13.512   1
  -5   3   2 198.240  15.579   3
  -5   3   2 184.788  13.515   1
  -5   3   2 208.364  16.261   4
  -5   3   2 178.002  14.382   2
   4  -3  -2 1894.34  151.39   2
   4  -3  -2 2303.55  165.33   4
  -4   3   2 2218.66  165.42   4
  -4   3   2 2097.62  144.11   1
  -4   3   2 2020.30  151.42   2
   3  -3  -2 663.723  47.664   1
   3  -3  -2 765.460  54.854   4
   3  -3  -2 683.406  47.709   1
  -3   3   2 762.544  54.863   4
  -3   3   2 701.005  47.691   1
  -3   3   2 626.427  47.610   1
  -3   3   2 608.759  49.836   2
   2  -3  -2 53.4270 10.2706   1
   2  -3  -2 49.4256  9.8125   1
   2  -3  -2 49.8634 16.9284   4
  -2   3   2 78.7169  7.0691   1
  -2   3   2 117.552  68.572   4
  -2   3   2 68.7719  5.9249   1
   1  -3  -2 216.145  15.938   1
   1  -3  -2 208.917  15.094   1
  -1   3   2 219.802  15.168   1
  -1   3   2 210.652  15.120   1
  -1   3   2 194.793  18.996   4
   0  -3  -2 1143.22   78.43   1
   0  -3  -2 1073.06   89.76   4
   0   3   2 1144.70   91.68   4
   0   3   2 1197.20   78.45   1
  -1  -3  -2 13.9892  3.6300   5
  -1  -3  -2 18.0375  7.3702   1
  -1  -3  -2 26.9991 30.0330   4
   1   3   2 15.8911  2.7061   5
   1   3   2 15.2649 26.4004   4
   1   3   2 18.8700  2.6229   1
  -3  -3  -2 53.2018  6.2784   1
  -3  -3  -2 62.0622  5.7705   4
  -3  -3  -2 65.5183 24.1468   5
  -3  -3  -2 56.5786  8.4981   1
   3   3   2 60.9616  5.3363   5
   3   3   2 57.3052  5.1540   2
   3   3   2 55.0007  8.5669   1
   3   3   2 54.4768  5.4514   1
   3   3   2 67.8001  7.6429   4
  -4  -3  -2 2651.33  248.17   4
  -4  -3  -2 2639.64  203.11   1
  -4  -3  -2 2976.31  218.21   5
   4   3   2 2800.23  202.12   5
   4   3   2 2580.77  196.21   2
  -5  -3  -2 1159.87   85.08   1
  -5  -3  -2 1080.98   97.74   4
  -5  -3  -2 1306.43  131.47   5
   5   3   2 1170.09   83.01   1
   5   3   2 1236.28   88.88   5
   5   3   2 1294.52   92.50   3
   5   3   2 1183.81   83.28   1
   5   3   2 1256.76   87.49   2
  -6  -3  -2 619.228  45.261   5
   6   3   2 534.627  42.937   1
   6   3   2 585.228  40.464   1
   6   3   2 579.339  43.651   2
  -7  -3  -2 121.526  10.119   5
   7   3   2 108.725   8.831   1
   7   3   2 104.706   8.615   1
   7   3   2 106.969  15.685   3
   7   3   2 127.064  10.028   2
  -8  -3  -2 10.1771  9.0168   5
  -8  -3  -2 17.0818  4.3390   1
   8   3   2 14.3869  8.3559   2
   8   3   2 18.0477  3.9204   1
   8   3   2  9.0058 12.3292   3
   8   3   2 17.0684  5.0580   1
  -9  -3  -2 294.606  24.199   1
  -9  -3  -2 332.358  25.441   5
   9   3   2 302.409  22.958   1
   9   3   2 355.572  26.673   3
   9   3   2 366.348  25.502   2
   9   3   2 302.322  23.051   1
 -10  -3  -2 1638.11  125.95   5
 -10  -3  -2 1301.49  189.15   1
  10   3   2 1775.73  112.88   1
  10   3   2 1444.75  129.08   1
  10   3   2 1717.56  124.24   3
 -11  -3  -2 78.9280  6.7309   1
 -11  -3  -2 98.5264 13.3069   5
  11   3   2 82.9080  6.7766   1
 -12  -3  -2 563.926  70.310   1
 -12  -3  -2 611.486  47.615   5
  12   3   2 604.859  43.242   1
  12   3   2 683.378  49.889   3
 -13  -3  -2 74.8171  8.4316   5
  13   3   2 62.6302  5.5553   1
  13   3   2 85.1417  9.2261   3
 -14  -3  -2 19.9073 10.4857   5
 -15  -3  -2 97.2993 10.4158   5
  15   3   2 114.672  12.017   3
 -16  -3  -2 275.734  23.540   5
  16   3   2 293.111  25.059   3
  18   3   2 111.547  13.060   3
  19   3   2 25.9579  7.7643   3
  20   3   2 20.9337  7.8187   3
  21   3   2 15.5620  7.6627   3
 -23   4   2 42.6602 10.2344   4
 -22   4   2 -13.183   7.973   4
 -20   4   2 1.95762 7.21381   4
 -19   4   2 8.76804 6.55560   4
 -18   4   2 5.99331 7.73940   4
 -17   4   2 30.9976  5.0070   5
 -17   4   2 24.4832  7.3984   4
 -16   4   2 112.473  13.752   4
 -15   4   2 428.313  36.474   4
 -14   4   2 116.321  14.804   4
  13  -4  -2 201.799  18.475   2
 -13   4   2 234.440  20.252   4
  12  -4  -2 409.752  35.743   2
 -12   4   2 512.928  53.689   4
  11  -4  -2 25.7418  2.5749   1
  11  -4  -2 23.0263  4.7429   1
  11  -4  -2 14.6589 10.6152   2
 -11   4   2 27.9313  6.9409   4
 -11   4   2 24.4493  2.2209   1
  10  -4  -2 414.078  30.246   1
  10  -4  -2 421.770  33.046   2
 -10   4   2 482.398  36.584   4
 -10   4   2 428.052  30.176   1
   9  -4  -2 76.0214  7.1629   2
   9  -4  -2 71.6436  7.5434   1
  -9   4   2 81.7258  5.8133   1
  -9   4   2 70.3451  8.3722   4
   8  -4  -2 3958.20  299.56   2
  -8   4   2 4382.99  326.32   4
   7  -4  -2 38.7517  8.7311   1
   7  -4  -2 41.1667  3.7636   1
   7  -4  -2 37.7008  9.8367   2
  -7   4   2 39.2366 11.0387   4
  -7   4   2 45.0710  3.7139   1
   5  -4  -2 171.129  15.325   1
   5  -4  -2 152.901  13.053   2
   5  -4  -2 165.772  12.615   1
  -5   4   2 177.910  16.294   4
  -5   4   2 169.150  13.066   2
  -5   4   2 180.846  12.566   1
  -5   4   2 180.364  12.562   1
   3  -4  -2 604.267  47.407   1
   3  -4  -2 691.722  48.349   1
   3  -4  -2 726.028  54.829   4
  -3   4   2 717.607  54.519   4
  -3   4   2 691.457  47.500   1
   1  -4  -2 29.0336 11.1467   5
   1  -4  -2 19.2111  5.2472   1
   1  -4  -2 11.7137  4.1546   1
   1  -4  -2 17.3488  7.1254   4
  -1   4   2 13.2813  7.8501   4
  -1   4   2 19.9210  7.9317   1
  -1   4   2 12.4334  2.8956   1
  -1  -4  -2 42.6038 12.8203   4
  -1  -4  -2 47.5883 13.7913   5
  -1  -4  -2 41.8285 25.0800   1
  -1  -4  -2 43.5586  5.7206   1
   1   4   2 32.5097 12.6863   4
   1   4   2 49.3757  4.3937   5
   1   4   2 38.3263 10.8912   1
  -2  -4  -2 2616.77  165.18   1
  -2  -4  -2 2317.60  165.29   1
  -2  -4  -2 2601.46  177.34   5
   2   4   2 2532.05  165.08   1
   2   4   2 2213.34  173.60   2
   2   4   2 2066.70  193.09   4
   2   4   2 2525.14  165.13   1
  -3  -4  -2 602.589  44.528   5
  -3  -4  -2 579.615  41.962   1
   3   4   2 617.294  44.307   5
   3   4   2 634.336  47.617   4
   3   4   2 577.130  41.354   1
   3   4   2 600.195  41.495   1
   3   4   2 552.036  43.238   2
  -4  -4  -2 15.3399  3.8168   5
  -4  -4  -2 14.4792  2.9412   4
  -4  -4  -2 18.5488  4.1524   1
   4   4   2 17.7076  2.9152   2
   4   4   2 11.0401  9.4331   1
  -5  -4  -2 1139.60   77.03   5
  -5  -4  -2 899.682  92.586   4
  -5  -4  -2 985.870  73.619   1
   5   4   2 1095.55   75.39   2
   5   4   2 1086.71   71.59   1
   5   4   2 1094.25   81.30   3
   5   4   2 932.448  72.549   1
  -6  -4  -2 87.1874  8.4435   5
  -6  -4  -2 82.2914  9.1051   1
   6   4   2 98.8985 12.5992   1
   6   4   2 87.5347 26.1559   3
   6   4   2 93.8949 10.6968   2
   6   4   2 77.4285  8.6402   1
  -7  -4  -2 455.317  32.711   5
  -7  -4  -2 369.033  31.102   1
   7   4   2 451.024  29.971   1
   7   4   2 378.380  31.738   2
   7   4   2 466.863  33.655   3
  -8  -4  -2 272.790  21.923   5
  -8  -4  -2 240.596  19.299   1
   8   4   2 246.051  19.177   1
   8   4   2 288.802  23.142   3
   8   4   2 221.250  50.755   1
   8   4   2 304.194  21.555   2
  -9  -4  -2 1.83735 4.18744   5
  -9  -4  -2 0.12221 3.56340   1
   9   4   2 -2.1670  2.5150   1
   9   4   2 3.20277 3.39227   2
   9   4   2  0.6387 10.2500   3
   9   4   2 3.00360 1.61164   1
 -10  -4  -2 154.818  11.939   1
 -10  -4  -2 151.388  16.605   5
  10   4   2 139.113  17.208   1
  10   4   2 146.925  11.661   1
  10   4   2 188.730  17.255   3
 -11  -4  -2 5.35707 5.30669   5
 -11  -4  -2 9.59628 2.47563   1
  11   4   2  7.1177 12.7060   3
  11   4   2 13.7950  2.1850   1
 -12  -4  -2 -0.0734  4.8637   5
  12   4   2  1.4748 13.1704   3
  12   4   2 -3.9718  2.6623   1
 -13  -4  -2  2.2571 11.2560   5
  13   4   2 0.57373 1.77509   1
  13   4   2 -10.694   8.199   3
 -14  -4  -2 377.810  33.582   5
  14   4   2 402.531  32.390   3
 -15  -4  -2 175.414  18.220   5
  15   4   2 182.760  17.259   3
 -16  -4  -2 -2.2663  7.9269   5
  16   4   2 2.64105 7.15778   3
 -17  -4  -2 56.8623  7.8947   5
  17   4   2 48.2242  7.6326   3
  18   4   2 132.790  14.462   3
  19   4   2 0.17187 6.06278   3
  20   4   2 28.6775  8.0217   3
  21   4   2 35.5130  8.0706   3
 -23   5   2 3.03340 7.31858   4
 -22   5   2 9.27540 8.36493   4
 -21   5   2 -7.2142  7.1962   4
 -20   5   2 4.91311 9.79850   4
 -19   5   2 0.48664 6.94817   4
 -18   5   2 24.5666 14.8467   4
 -18   5   2 35.6460  5.5857   5
 -17   5   2 133.568  15.111   4
 -16   5   2 84.3898 11.6919   4
 -15   5   2 18.9507  8.4421   4
 -14   5   2 615.882  50.948   4
 -13   5   2 79.6968 10.8789   4
  12  -5  -2 140.746  11.606   1
 -12   5   2 145.401  11.099   1
 -12   5   2 150.627  17.351   4
  11  -5  -2 122.942  14.315   2
  11  -5  -2 112.677   9.758   1
 -11   5   2 130.303  12.467   4
 -11   5   2 120.123   8.905   1
 -10   5   2 78.0229  6.1909   1
   9  -5  -2 104.142  11.944   2
   9  -5  -2 128.259   9.331   1
   9  -5  -2 121.212   9.129   1
  -9   5   2 122.615   9.092   1
  -9   5   2 122.446  11.921   4
   8  -5  -2 4293.63  337.56   2
   8  -5  -2 4846.87  322.57   1
  -8   5   2 4926.33  366.79   4
   7  -5  -2 -2.6319  2.3866   1
   7  -5  -2 -0.2523  6.7771   1
   7  -5  -2 0.75996 2.47882   2
  -7   5   2 4.63961 2.72122   1
  -7   5   2 4.12956 4.05017   4
   6  -5  -2 215.434  15.053   1
   6  -5  -2 193.521  14.251   1
   6  -5  -2 201.138  14.771   2
  -6   5   2 183.333  14.110   1
  -6   5   2 164.689  14.557   2
   5  -5  -2 17.3647  2.8246   1
   5  -5  -2 20.0171 11.5068   1
  -5   5   2 20.4250 13.7684   4
  -5   5   2 19.5897  4.6437   1
  -5   5   2 17.4624  2.1450   2
   4  -5  -2 1547.00  107.02   1
  -4   5   2 1474.96  106.88   1
  -4   5   2 1653.19  124.64   4
   3  -5  -2 44.9056 83.4563   4
   3  -5  -2 42.4481 86.7234   1
  -3   5   2 91.5566 73.9455   4
  -3   5   2 60.2530 57.7248   1
   1  -5  -2 51.7079 28.4730   5
   1  -5  -2 43.3381 14.7050   1
   1  -5  -2 48.1340 33.6564   4
   1  -5  -2 51.6093  9.7809   1
  -1   5   2 50.2200 23.9639   1
  -1   5   2 69.4469  9.2502   5
  -1   5   2 34.9704 20.3792   4
  -1   5   2 53.0858  5.0124   1
   0  -5  -2 1806.11  114.48   1
   0  -5  -2 1384.50  155.39   4
   0  -5  -2 1771.49  125.61   5
   0  -5  -2 1570.97  115.81   1
   0   5   2 1689.77  114.35   1
   0   5   2 1455.48  496.17   4
   0   5   2 1707.38  114.78   1
  -1  -5  -2 1256.64  145.62   4
  -1  -5  -2 1017.24  223.05   2
   1   5   2 1197.39  127.59   2
   1   5   2 1324.42   90.28   1
   1   5   2 1279.11  101.00   1
  -2  -5  -2 102.964  10.848   4
   2   5   2 135.012   9.308   2
   2   5   2 121.028  11.789   4
  -3  -5  -2 66.8805 11.5977   1
  -3  -5  -2 65.1083 12.1678   4
   3   5   2 74.9440 14.2771   4
   3   5   2 49.6663  5.6313   2
   3   5   2 67.8786  8.3176   1
   3   5   2 57.9374  6.0338   1
  -4  -5  -2 104.231   9.099   2
  -4  -5  -2 124.549  19.526   4
  -4  -5  -2 123.662  12.266   5
   4   5   2 118.028  17.126   1
   4   5   2 106.485  15.530   4
   4   5   2 116.207   9.257   2
  -5  -5  -2 36.6172  4.3429   1
  -5  -5  -2 29.6010  5.6335   5
   5   5   2 38.9356  4.2754   2
   5   5   2 32.5619  3.7984   1
   5   5   2 37.4805  5.7232   3
   5   5   2 33.7319  7.4733   1
  -6  -5  -2 -0.3325  5.7683   5
   6   5   2 -1.1030 14.3165   1
   6   5   2 2.56314 4.68430   2
   6   5   2 0.67900 3.88434   1
  -7  -5  -2 141.829  21.193   5
   7   5   2 92.9895 13.8277   1
   7   5   2 136.334  13.318   2
   7   5   2 132.864  11.392   3
   7   5   2 123.007  10.011   1
  -8  -5  -2 1090.95   86.36   1
  -8  -5  -2 1108.46   92.98   5
   8   5   2 1169.11   82.30   2
   8   5   2 1133.25   77.69   1
   8   5   2 1179.44   86.65   3
   8   5   2 1056.09   78.74   1
  -9  -5  -2 45.7035  8.3704   1
   9   5   2 30.7989 14.5404   2
   9   5   2 23.6751  9.1364   1
   9   5   2 29.3475  3.4982   1
   9   5   2 17.2974 15.4754   3
 -10  -5  -2 1584.82  210.32   5
 -10  -5  -2 1564.82  166.13   1
  10   5   2 1846.81  123.99   2
  10   5   2 1673.85  122.54   1
  10   5   2 1649.55  124.65   1
  10   5   2 1736.36  130.19   3
 -11  -5  -2 48.1290  5.0135   1
 -11  -5  -2 54.3823  7.7183   5
  11   5   2 64.1628 10.7363   3
  11   5   2 40.3640  5.6603   1
 -12  -5  -2 719.103  66.079   5
  12   5   2 786.568  57.658   3
  12   5   2 670.953  54.575   1
  13   5   2 2.53206 2.17063   1
  13   5   2 5.24571 4.82798   3
 -14  -5  -2 63.7728 10.6523   5
  14   5   2 63.7913 10.9797   3
  14   5   2 48.0689  4.7075   1
 -15  -5  -2 0.92051 5.43001   5
  15   5   2 18.3552  6.5784   3
 -16  -5  -2 27.2605  6.6835   5
  16   5   2 41.5125  7.6773   3
 -17  -5  -2 70.3956  9.1536   5
  17   5   2 59.4326  8.5319   3
  20   5   2 2.70931 6.06467   3
 -23   6   2 -14.781   8.601   4
 -22   6   2 -0.1622  6.5186   4
 -21   6   2 91.9729 13.2333   4
 -20   6   2 23.2379  7.3174   4
 -19   6   2 -11.697   7.773   4
 -18   6   2 12.8202  6.8492   4
 -17   6   2 12.6206  7.0022   4
 -16   6   2 30.7453  8.1379   4
 -15   6   2 93.2640 11.5577   4
  14  -6  -2 63.2575  5.4082   1
 -14   6   2 75.5325 10.7317   4
  13  -6  -2 1.96051 3.45861   1
 -13   6   2 -1.8346  8.1816   4
  12  -6  -2 221.546  17.182   1
  12  -6  -2 221.096  16.893   1
 -12   6   2 269.022  23.681   4
 -12   6   2 231.407  16.703   1
  11  -6  -2 141.915  14.098   1
 -11   6   2 152.750  11.139   1
 -11   6   2 152.735  17.132   4
  10  -6  -2 692.797  55.789   1
  10  -6  -2 844.318  55.844   1
 -10   6   2 868.337  69.682   4
 -10   6   2 815.976  55.640   1
   9  -6  -2 -2.6269  5.7582   1
   9  -6  -2 -3.7584  8.4150   1
  -9   6   2 -6.4108 28.4465   4
  -9   6   2 -2.9721  1.6540   1
   8  -6  -2 111.070   9.570   1
   8  -6  -2 121.475   9.105   1
  -8   6   2 129.942  27.479   4
  -8   6   2 109.518   9.357   1
   7  -6  -2 186.070  18.537   1
   7  -6  -2 163.784  13.011   1
  -7   6   2 171.265  13.508   2
  -7   6   2 185.150  27.566   4
  -7   6   2 180.174  13.036   1
   6  -6  -2 807.196  58.150   1
   6  -6  -2 832.021  58.117   1
  -6   6   2 784.241  57.979   1
  -6   6   2 840.474  60.697   2
  -6   6   2 940.902  75.114   4
   5  -6  -2 -11.697   8.772   1
   5  -6  -2 -4.6914  4.1246   1
  -5   6   2 -0.3749  2.8607   2
  -5   6   2 -0.0655  2.4968   1
  -5   6   2 -7.1813 15.7115   4
   4  -6  -2 1874.61  126.95   1
   4  -6  -2 1815.49  126.97   1
   3  -6  -2 4.53639 3.00962   1
  -3   6   2 -0.7591  4.8934   4
  -3   6   2 5.77519 5.69272   1
   2  -6  -2 3887.29  296.31   1
   2  -6  -2 4720.23  316.03   5
   2  -6  -2 4186.29  291.70   1
   1  -6  -2 30.3030 23.6446   5
  -1   6   2 31.4547 15.3009   1
  -1   6   2  34.451 118.131   4
   0  -6  -2 2806.26  173.16   1
   0  -6  -2 2048.26  256.65   4
   0  -6  -2 2640.08  185.39   5
   0   6   2 2630.94  174.11   1
   0   6   2 2288.01  212.44   4
  -1  -6  -2 2076.87  144.50   5
  -1  -6  -2 1966.94  134.87   1
   1   6   2 1832.59  154.27   4
  -2  -6  -2 2192.66  139.49   1
  -2  -6  -2 2022.12  177.60   5
  -2  -6  -2 1893.12  172.52   4
   2   6   2 1937.61  139.15   1
   2   6   2 2078.19  159.63   4
   2   6   2 2019.82  139.29   1
  -3  -6  -2 276.641  30.576   4
  -3  -6  -2 384.792  84.472   5
  -3  -6  -2 325.095  22.646   1
   3   6   2 330.129  22.462   1
   3   6   2 293.075  22.976   2
  -4  -6  -2 127.709  11.481   5
  -4  -6  -2 134.262  10.233   1
   4   6   2 139.568   9.992   1
   4   6   2 119.417  12.622   1
   4   6   2 116.297  10.011   2
   4   6   2 92.5498 18.8910   4
  -5  -6  -2 26.3404 14.9195   1
   5   6   2 8.82080 7.59003   2
[truncated: 1,977,925 more chars]
